# Supplementary material for: Tumor-Promoting vs. Protective Immune Phenotypes in Stage III Colorectal Cancer: A Mendelian Randomization Study on Chemotherapy Outcomes
Source: Research Square preprint supplement (doi:10.21203/rs.3.rs-6756503/v1), 2025-06-17
Supplement: Supplementary file 1 [file b5ec5242e54073def6d07a4f.xlsx]

## Sheet: Supplement Table1
Supplement Table 1 SNP details for 731 Plasma Immune Cells
SNP	chr.exposure	pos.exposure	effect_allele.exposure	other_allele.exposure	eaf.exposure	beta.exposure	se.exposure	pval.exposure	exposure	samplesize.exposure
rs72757888	1	233045963	T	C	0.01	0.5864	0.1201	1.086e-06	IgD+ B cell %B cell || id:ebi-a-GCST90001391	3658
rs138919897	3	106834795	G	A	0.0019	1.402	0.2997	2.986e-06	IgD+ B cell %B cell || id:ebi-a-GCST90001391	3658
rs4691917	4	164344795	G	A	0.9956	0.9378	0.1877	6.10394e-07	IgD+ B cell %B cell || id:ebi-a-GCST90001391	3658
rs17405603	5	144608340	T	A	0.284	0.1542	0.02757	2.38298e-08	IgD+ B cell %B cell || id:ebi-a-GCST90001391	3658
rs72952600	6	114522609	G	C	0.0142	0.49	0.1045	2.83302e-06	IgD+ B cell %B cell || id:ebi-a-GCST90001391	3658
rs9265870	6	31312892	G	A	0.4718	0.1454	0.03049	1.92398e-06	IgD+ B cell %B cell || id:ebi-a-GCST90001391	3658
rs10226722	7	68025695	C	T	0.6006	0.1184	0.0256	3.83698e-06	IgD+ B cell %B cell || id:ebi-a-GCST90001391	3658
rs2450220	8	119323401	T	C	0.816	-0.152	0.03167	1.65299e-06	IgD+ B cell %B cell || id:ebi-a-GCST90001391	3658
rs140191306	9	2570753	T	C	0.0179	0.4421	0.09364	2.427e-06	IgD+ B cell %B cell || id:ebi-a-GCST90001391	3658
rs11068290	12	110228055	T	C	0.0231	0.3904	0.08097	1.486e-06	IgD+ B cell %B cell || id:ebi-a-GCST90001391	3658
rs73426855	17	77637123	C	T	0.1471	-0.174	0.03482	6.07995e-07	IgD+ B cell %B cell || id:ebi-a-GCST90001391	3658
rs148496020	17	51092001	A	T	0.0193	-0.4088	0.08921	4.74799e-06	IgD+ B cell %B cell || id:ebi-a-GCST90001391	3658
rs116285595	1	200858159	T	C	0.0068	0.6503	0.1415	4.44396e-06	IgD+ CD38+ B cell Absolute Count || id:ebi-a-GCST90001392	3656
rs12036556	1	99149370	T	C	0.0265	0.3487	0.07421	2.714e-06	IgD+ CD38+ B cell Absolute Count || id:ebi-a-GCST90001392	3656
rs1294253	1	233503875	C	T	0.7254	-0.1382	0.02658	2.1e-07	IgD+ CD38+ B cell Absolute Count || id:ebi-a-GCST90001392	3656
rs146959444	1	167027268	C	T	0.0023	1.249	0.2574	1.287e-06	IgD+ CD38+ B cell Absolute Count || id:ebi-a-GCST90001392	3656
rs733555	2	16464227	T	G	0.2637	-0.1396	0.02714	2.85299e-07	IgD+ CD38+ B cell Absolute Count || id:ebi-a-GCST90001392	3656
rs78188887	2	155636739	G	A	0.0014	1.533	0.3206	1.80198e-06	IgD+ CD38+ B cell Absolute Count || id:ebi-a-GCST90001392	3656
rs140380950	2	105587803	C	T	0.0368	-0.3568	0.06296	1.567e-08	IgD+ CD38+ B cell Absolute Count || id:ebi-a-GCST90001392	3656
rs374727947	3	163801921	G	T	0.0098	0.6111	0.1307	3.02197e-06	IgD+ CD38+ B cell Absolute Count || id:ebi-a-GCST90001392	3656
rs76112278	4	15915069	A	G	0.0194	-0.4579	0.08605	1.09099e-07	IgD+ CD38+ B cell Absolute Count || id:ebi-a-GCST90001392	3656
rs7667070	4	38379833	C	T	0.0361	-0.2956	0.06254	2.36298e-06	IgD+ CD38+ B cell Absolute Count || id:ebi-a-GCST90001392	3656
rs80330977	5	158276610	A	G	0.0814	-0.2576	0.04422	6.158e-09	IgD+ CD38+ B cell Absolute Count || id:ebi-a-GCST90001392	3656
rs78658073	5	498773	A	G	0.001	1.665	0.362	4.385e-06	IgD+ CD38+ B cell Absolute Count || id:ebi-a-GCST90001392	3656
rs143397127	7	12847391	C	T	0.0157	-0.4626	0.09576	1.41599e-06	IgD+ CD38+ B cell Absolute Count || id:ebi-a-GCST90001392	3656
rs1695681	8	118255950	A	C	0.5309	-0.1256	0.02413	2.05698e-07	IgD+ CD38+ B cell Absolute Count || id:ebi-a-GCST90001392	3656
rs16868356	8	102770464	C	T	0.0198	0.4146	0.08532	1.226e-06	IgD+ CD38+ B cell Absolute Count || id:ebi-a-GCST90001392	3656
rs2395904	8	130617819	G	T	0.2657	-0.1279	0.02666	1.69001e-06	IgD+ CD38+ B cell Absolute Count || id:ebi-a-GCST90001392	3656
rs61878035	11	15328898	A	G	0.1886	0.1453	0.03068	2.24202e-06	IgD+ CD38+ B cell Absolute Count || id:ebi-a-GCST90001392	3656
rs11159480	14	81466662	T	G	0.8166	-0.1526	0.0323	2.399e-06	IgD+ CD38+ B cell Absolute Count || id:ebi-a-GCST90001392	3656
rs76608654	16	55450479	C	T	0.0494	0.2489	0.05423	4.56405e-06	IgD+ CD38+ B cell Absolute Count || id:ebi-a-GCST90001392	3656
rs12939565	17	38038389	T	A	0.4267	-0.1364	0.02672	3.47496e-07	IgD+ CD38+ B cell Absolute Count || id:ebi-a-GCST90001392	3656
rs6835759	4	170328209	G	A	0.4701	0.1189	0.02486	1.79498e-06	IgD+ CD38dim B cell %B cell || id:ebi-a-GCST90001393	3657
rs2301101	5	83420407	G	T	0.1097	-0.187	0.03994	2.93501e-06	IgD+ CD38dim B cell %B cell || id:ebi-a-GCST90001393	3657
rs546147740	8	4318676	C	T	0.0051	0.763	0.1665	4.75499e-06	IgD+ CD38dim B cell %B cell || id:ebi-a-GCST90001393	3657
rs61912200	12	1637126	A	T	0.0022	1.216	0.2655	4.81903e-06	IgD+ CD38dim B cell %B cell || id:ebi-a-GCST90001393	3657
rs78269238	14	65673804	T	C	0.0582	-0.2771	0.05349	2.34498e-07	IgD+ CD38dim B cell %B cell || id:ebi-a-GCST90001393	3657
rs34157595	17	49200947	C	T	0.3154	0.1327	0.02673	7.23303e-07	IgD+ CD38dim B cell %B cell || id:ebi-a-GCST90001393	3657
rs329966	19	53070617	G	A	0.5425	-0.1265	0.02461	2.90402e-07	IgD+ CD38dim B cell %B cell || id:ebi-a-GCST90001393	3657
rs4811007	20	48839604	G	A	0.4837	0.1261	0.02461	3.12702e-07	IgD+ CD38dim B cell %B cell || id:ebi-a-GCST90001393	3657
rs78958229	21	39363957	T	C	0.044	0.2934	0.0591	7.21705e-07	IgD+ CD38dim B cell %B cell || id:ebi-a-GCST90001393	3657
rs147207149	5	128786753	G	A	0.0075	0.6732	0.1407	1.78398e-06	IgD+ CD38dim B cell Absolute Count || id:ebi-a-GCST90001394	3656
rs17056318	5	158285953	C	T	0.081	-0.2225	0.04431	5.37403e-07	IgD+ CD38dim B cell Absolute Count || id:ebi-a-GCST90001394	3656
rs1510970	5	118216738	A	G	0.087	-0.1966	0.04234	3.57001e-06	IgD+ CD38dim B cell Absolute Count || id:ebi-a-GCST90001394	3656
rs141880653	5	166970737	T	C	0.001	1.849	0.3979	3.49004e-06	IgD+ CD38dim B cell Absolute Count || id:ebi-a-GCST90001394	3656
rs12197153	6	100821460	A	G	0.0007	2.216	0.4431	5.95895e-07	IgD+ CD38dim B cell Absolute Count || id:ebi-a-GCST90001394	3656
rs143397127	7	12847391	C	T	0.0157	-0.4549	0.09626	2.37602e-06	IgD+ CD38dim B cell Absolute Count || id:ebi-a-GCST90001394	3656
rs2395904	8	130617819	G	T	0.2657	-0.1253	0.0268	3.02503e-06	IgD+ CD38dim B cell Absolute Count || id:ebi-a-GCST90001394	3656
rs283340	8	70193536	C	T	0.5621	0.1175	0.02409	1.128e-06	IgD+ CD38dim B cell Absolute Count || id:ebi-a-GCST90001394	3656
rs116851238	10	33792014	T	C	0.0176	-0.4319	0.08996	1.64399e-06	IgD+ CD38dim B cell Absolute Count || id:ebi-a-GCST90001394	3656
rs12799241	11	119980729	A	G	0.2619	0.13	0.0273	1.99301e-06	IgD+ CD38dim B cell Absolute Count || id:ebi-a-GCST90001394	3656
rs75474045	13	72428296	A	G	0.0126	0.5528	0.1063	2.08502e-07	IgD+ CD38dim B cell Absolute Count || id:ebi-a-GCST90001394	3656
rs12906621	15	37177413	A	G	0.1091	0.1764	0.03817	3.91102e-06	IgD+ CD38dim B cell Absolute Count || id:ebi-a-GCST90001394	3656
rs143176410	16	84305239	C	G	0.001	1.912	0.3929	1.185e-06	IgD+ CD38dim B cell Absolute Count || id:ebi-a-GCST90001394	3656
rs12939566	17	38038390	T	A	0.4148	-0.1486	0.02725	5.30603e-08	IgD+ CD38dim B cell Absolute Count || id:ebi-a-GCST90001394	3656
rs4792571	17	14931234	T	G	0.4699	0.1093	0.02377	4.41804e-06	IgD+ CD38dim B cell Absolute Count || id:ebi-a-GCST90001394	3656
rs655580	19	53039110	A	G	0.4571	0.1183	0.0239	7.70495e-07	IgD+ CD38dim B cell Absolute Count || id:ebi-a-GCST90001394	3656
rs34764986	20	59926554	C	T	0.0699	-0.2175	0.04671	3.31497e-06	IgD+ CD38dim B cell Absolute Count || id:ebi-a-GCST90001394	3656
rs1512044	3	188624425	A	G	0.1084	0.202	0.03882	2.07e-07	IgD+ CD38- B cell %B cell || id:ebi-a-GCST90001395	3657
rs78009119	5	136421498	G	T	0.0137	-0.4914	0.1063	3.88401e-06	IgD+ CD38- B cell %B cell || id:ebi-a-GCST90001395	3657
rs2621369	6	32768285	T	C	0.2901	0.1498	0.03155	2.13098e-06	IgD+ CD38- B cell %B cell || id:ebi-a-GCST90001395	3657
rs113398446	6	161871755	C	A	0.1687	0.1793	0.03256	3.91201e-08	IgD+ CD38- B cell %B cell || id:ebi-a-GCST90001395	3657
rs80032720	6	32384933	A	G	0.0734	0.2539	0.05434	3.08901e-06	IgD+ CD38- B cell %B cell || id:ebi-a-GCST90001395	3657
rs10254361	7	119564205	T	G	0.2404	0.1333	0.02899	4.40099e-06	IgD+ CD38- B cell %B cell || id:ebi-a-GCST90001395	3657
rs77762131	14	96205838	C	G	0.045	0.3388	0.05748	4.101e-09	IgD+ CD38- B cell %B cell || id:ebi-a-GCST90001395	3657
rs10444793	15	44517689	A	G	0.018	-0.4608	0.09102	4.34901e-07	IgD+ CD38- B cell %B cell || id:ebi-a-GCST90001395	3657
rs11150426	16	81986583	C	G	0.5386	-0.1169	0.02444	1.78098e-06	IgD+ CD38- B cell %B cell || id:ebi-a-GCST90001395	3657
rs181771926	16	52294553	A	G	0.0126	-0.5276	0.1101	1.73002e-06	IgD+ CD38- B cell %B cell || id:ebi-a-GCST90001395	3657
rs329966	19	53070617	G	A	0.5425	0.1246	0.02445	3.62702e-07	IgD+ CD38- B cell %B cell || id:ebi-a-GCST90001395	3657
rs73909843	20	49554764	C	T	0.0764	-0.2138	0.04629	4.00904e-06	IgD+ CD38- B cell %B cell || id:ebi-a-GCST90001395	3657
rs79207264	3	96406408	A	G	0.1184	0.1854	0.03946	2.73602e-06	IgD+ CD38- B cell Absolute Count || id:ebi-a-GCST90001396	3656
rs146127735	5	502938	A	G	0.0383	0.3025	0.06424	2.59298e-06	IgD+ CD38- B cell Absolute Count || id:ebi-a-GCST90001396	3656
rs1158784	6	32758761	T	A	0.1554	0.174	0.03801	4.88405e-06	IgD+ CD38- B cell Absolute Count || id:ebi-a-GCST90001396	3656
rs12216018	6	130514590	T	C	0.1415	-0.1686	0.03603	2.988e-06	IgD+ CD38- B cell Absolute Count || id:ebi-a-GCST90001396	3656
rs146687492	11	125619694	T	G	0.0291	-0.3372	0.07361	4.76903e-06	IgD+ CD38- B cell Absolute Count || id:ebi-a-GCST90001396	3656
rs12874404	13	108993494	G	A	0.3256	0.1363	0.02669	3.41602e-07	IgD+ CD38- B cell Absolute Count || id:ebi-a-GCST90001396	3656
rs77762131	14	96205838	C	G	0.045	0.3229	0.05806	2.85299e-08	IgD+ CD38- B cell Absolute Count || id:ebi-a-GCST90001396	3656
rs1529727	19	11164067	G	T	0.5581	0.1176	0.02521	3.20701e-06	IgD+ CD38- B cell Absolute Count || id:ebi-a-GCST90001396	3656
rs62235484	21	41083050	A	G	0.0175	0.4628	0.09388	8.58005e-07	IgD+ CD38- B cell Absolute Count || id:ebi-a-GCST90001396	3656
rs146430312	1	236060214	T	G	0.0027	1.017	0.2222	4.87203e-06	Unswitched memory B cell %B cell || id:ebi-a-GCST90001397	3657
rs75766272	1	8009985	T	C	0.0201	-0.4409	0.08695	4.15002e-07	Unswitched memory B cell %B cell || id:ebi-a-GCST90001397	3657
rs77201712	2	157311822	C	T	0.0392	0.2907	0.06322	4.38995e-06	Unswitched memory B cell %B cell || id:ebi-a-GCST90001397	3657
rs17006489	2	28304630	G	A	0.1354	-0.1728	0.03779	4.976e-06	Unswitched memory B cell %B cell || id:ebi-a-GCST90001397	3657
rs72844588	2	138420154	A	G	0.0913	0.2054	0.04341	2.31398e-06	Unswitched memory B cell %B cell || id:ebi-a-GCST90001397	3657
rs45608038	2	73679013	G	A	0.0421	0.294	0.06266	2.80698e-06	Unswitched memory B cell %B cell || id:ebi-a-GCST90001397	3657
rs73032183	6	169456830	C	T	0.1509	0.1675	0.03506	1.852e-06	Unswitched memory B cell %B cell || id:ebi-a-GCST90001397	3657
rs4710879	6	170426027	T	C	0.5621	-0.1204	0.0253	2.03301e-06	Unswitched memory B cell %B cell || id:ebi-a-GCST90001397	3657
rs12539793	7	25971860	T	C	0.0115	-0.5404	0.1145	2.47002e-06	Unswitched memory B cell %B cell || id:ebi-a-GCST90001397	3657
rs1679013	9	22206987	T	C	0.5945	-0.1252	0.02555	9.97103e-07	Unswitched memory B cell %B cell || id:ebi-a-GCST90001397	3657
rs1930922	9	93297086	G	A	0.2419	-0.137	0.0295	3.54797e-06	Unswitched memory B cell %B cell || id:ebi-a-GCST90001397	3657
rs143553941	12	109368119	C	G	0.013	0.5187	0.1092	2.093e-06	Unswitched memory B cell %B cell || id:ebi-a-GCST90001397	3657
rs7322292	13	51370899	T	C	0.3275	-0.1256	0.02669	2.61403e-06	Unswitched memory B cell %B cell || id:ebi-a-GCST90001397	3657
rs73192651	13	50212885	T	C	0.02	0.5551	0.08989	7.31493e-10	Unswitched memory B cell %B cell || id:ebi-a-GCST90001397	3657
rs77762131	14	96205838	C	G	0.045	0.3067	0.05822	1.457e-07	Unswitched memory B cell %B cell || id:ebi-a-GCST90001397	3657
rs143666202	14	77579227	A	G	0.0503	0.2759	0.0579	1.957e-06	Unswitched memory B cell %B cell || id:ebi-a-GCST90001397	3657
rs1596383	18	7993103	A	G	0.6259	0.1208	0.02585	3.06302e-06	Unswitched memory B cell %B cell || id:ebi-a-GCST90001397	3657
rs1883832	20	44746982	C	T	0.6318	-0.1236	0.02682	4.23701e-06	Unswitched memory B cell %B cell || id:ebi-a-GCST90001397	3657
rs138380722	20	56790125	A	G	0.0007	-1.906	0.4167	4.94197e-06	Unswitched memory B cell %B cell || id:ebi-a-GCST90001397	3657
rs4076316	6	167859623	A	T	0.3005	-0.1331	0.02714	9.72904e-07	Unswitched memory B cell Absolute Count || id:ebi-a-GCST90001398	3656
rs118092259	8	89432719	G	T	0.0414	-0.2912	0.06306	4.00101e-06	Unswitched memory B cell Absolute Count || id:ebi-a-GCST90001398	3656
rs112839090	12	119727983	A	G	0.1972	-0.1468	0.03096	2.18902e-06	Unswitched memory B cell Absolute Count || id:ebi-a-GCST90001398	3656
rs12874404	13	108993494	G	A	0.3256	0.1523	0.02639	8.62303e-09	Unswitched memory B cell Absolute Count || id:ebi-a-GCST90001398	3656
rs557577736	13	46224092	G	A	0.001	1.924	0.3849	6.08793e-07	Unswitched memory B cell Absolute Count || id:ebi-a-GCST90001398	3656
rs145371905	13	70325772	T	G	0.0194	0.4126	0.08871	3.42997e-06	Unswitched memory B cell Absolute Count || id:ebi-a-GCST90001398	3656
rs73192651	13	50212885	T	C	0.02	0.4968	0.08845	2.09402e-08	Unswitched memory B cell Absolute Count || id:ebi-a-GCST90001398	3656
rs77762131	14	96205838	C	G	0.045	0.3067	0.05723	8.86605e-08	Unswitched memory B cell Absolute Count || id:ebi-a-GCST90001398	3656
rs143666202	14	77579227	A	G	0.0502	0.268	0.05703	2.711e-06	Unswitched memory B cell Absolute Count || id:ebi-a-GCST90001398	3656
rs8014978	14	94936964	C	T	0.5737	-0.123	0.02471	6.71104e-07	Unswitched memory B cell Absolute Count || id:ebi-a-GCST90001398	3656
rs11657118	17	2714118	C	T	0.475	-0.1112	0.02412	4.20998e-06	Unswitched memory B cell Absolute Count || id:ebi-a-GCST90001398	3656
rs12461001	19	14885525	A	G	0.6291	0.1184	0.02528	2.94802e-06	Unswitched memory B cell Absolute Count || id:ebi-a-GCST90001398	3656
rs6032660	20	44730245	A	G	0.6359	-0.1345	0.02641	3.65797e-07	Unswitched memory B cell Absolute Count || id:ebi-a-GCST90001398	3656
rs116473015	2	147859010	T	C	0.029	0.3455	0.07401	3.14101e-06	IgD- CD27- B cell %B cell || id:ebi-a-GCST90001399	3657
rs35574803	3	32533246	C	T	0.0562	-0.3526	0.05371	5.92243e-11	IgD- CD27- B cell %B cell || id:ebi-a-GCST90001399	3657
rs79430021	4	25037515	A	G	0.006	0.7602	0.1642	3.80697e-06	IgD- CD27- B cell %B cell || id:ebi-a-GCST90001399	3657
rs35661323	7	44284783	T	C	0.5505	0.1158	0.02527	4.73097e-06	IgD- CD27- B cell %B cell || id:ebi-a-GCST90001399	3657
rs2250246	12	6553016	G	A	0.5339	0.1466	0.02442	2.12501e-09	IgD- CD27- B cell %B cell || id:ebi-a-GCST90001399	3657
rs7224129	17	38075426	A	G	0.4751	-0.1297	0.02756	2.61e-06	IgD- CD27- B cell %B cell || id:ebi-a-GCST90001399	3657
rs11658240	17	80484139	G	A	0.1362	-0.1678	0.03574	2.76599e-06	IgD- CD27- B cell %B cell || id:ebi-a-GCST90001399	3657
rs72897237	18	37553257	C	T	0.0161	0.4671	0.09743	1.69699e-06	IgD- CD27- B cell %B cell || id:ebi-a-GCST90001399	3657
rs4810485	20	44747947	G	T	0.6314	0.3898	0.02585	7.1978e-50	IgD- CD27- B cell %B cell || id:ebi-a-GCST90001399	3657
rs6073079	20	42024537	A	G	0.12	0.1776	0.03746	2.21299e-06	IgD- CD27- B cell %B cell || id:ebi-a-GCST90001399	3657
rs11086984	20	44511627	T	C	0.1514	-0.1811	0.03498	2.36799e-07	IgD- CD27- B cell %B cell || id:ebi-a-GCST90001399	3657
rs71615254	4	178658413	C	A	0.0406	-0.3043	0.06135	7.40406e-07	IgD+ B cell Absolute Count || id:ebi-a-GCST90001400	3657
rs12197153	6	100821460	A	G	0.0007	2.08	0.4491	3.74498e-06	IgD+ B cell Absolute Count || id:ebi-a-GCST90001400	3657
rs9354413	6	67039330	C	T	0.2963	0.1254	0.02726	4.385e-06	IgD+ B cell Absolute Count || id:ebi-a-GCST90001400	3657
rs150663332	8	2044843	T	C	0.0839	-0.2314	0.04374	1.28399e-07	IgD+ B cell Absolute Count || id:ebi-a-GCST90001400	3657
rs701839	10	102955294	G	A	0.7123	0.1309	0.02785	2.713e-06	IgD+ B cell Absolute Count || id:ebi-a-GCST90001400	3657
rs189761842	10	125485345	T	C	0.0055	0.8269	0.1697	1.15199e-06	IgD+ B cell Absolute Count || id:ebi-a-GCST90001400	3657
rs4145212	13	108960188	A	T	0.5405	0.1284	0.02442	1.52901e-07	IgD+ B cell Absolute Count || id:ebi-a-GCST90001400	3657
rs3811215	14	22954777	T	G	0.3033	-0.1332	0.02679	6.85993e-07	IgD+ B cell Absolute Count || id:ebi-a-GCST90001400	3657
rs11638959	15	25171150	A	G	0.1557	0.1525	0.03281	3.46801e-06	IgD+ B cell Absolute Count || id:ebi-a-GCST90001400	3657
rs11653761	17	2716535	T	G	0.5919	-0.1212	0.02449	7.76998e-07	IgD+ B cell Absolute Count || id:ebi-a-GCST90001400	3657
rs62067029	17	38038391	T	A	0.4148	-0.1669	0.0285	5.11505e-09	IgD+ B cell Absolute Count || id:ebi-a-GCST90001400	3657
rs12461001	19	14885525	A	G	0.6292	0.1175	0.02527	3.43202e-06	IgD+ B cell Absolute Count || id:ebi-a-GCST90001400	3657
rs61786059	1	29035758	T	G	0.3135	-0.1238	0.02692	4.44601e-06	IgD- CD27- B cell Absolute Count || id:ebi-a-GCST90001401	3656
rs7518494	1	217233446	A	G	0.9334	0.2278	0.04884	3.211e-06	IgD- CD27- B cell Absolute Count || id:ebi-a-GCST90001401	3656
rs185621536	1	113524501	T	C	0.0312	-0.3205	0.07004	4.89396e-06	IgD- CD27- B cell Absolute Count || id:ebi-a-GCST90001401	3656
rs72953104	1	41379583	G	C	0.0643	0.2313	0.05018	4.17503e-06	IgD- CD27- B cell Absolute Count || id:ebi-a-GCST90001401	3656
rs11688492	2	64865804	C	T	0.5196	-0.1216	0.02504	1.243e-06	IgD- CD27- B cell Absolute Count || id:ebi-a-GCST90001401	3656
rs114551034	2	66709035	A	G	0.0509	-0.2787	0.05695	1.033e-06	IgD- CD27- B cell Absolute Count || id:ebi-a-GCST90001401	3656
rs35574803	3	32533246	C	T	0.0562	-0.2808	0.05393	2.01999e-07	IgD- CD27- B cell Absolute Count || id:ebi-a-GCST90001401	3656
rs144306835	8	96356983	A	G	0.0234	0.3826	0.07964	1.617e-06	IgD- CD27- B cell Absolute Count || id:ebi-a-GCST90001401	3656
rs112432445	9	4162626	A	G	0.0528	0.2796	0.05583	5.767e-07	IgD- CD27- B cell Absolute Count || id:ebi-a-GCST90001401	3656
rs2250246	12	6553016	G	A	0.5341	0.1359	0.02451	3.12903e-08	IgD- CD27- B cell Absolute Count || id:ebi-a-GCST90001401	3656
rs421516	17	63135589	A	C	0.9583	-0.2897	0.0627	3.96798e-06	IgD- CD27- B cell Absolute Count || id:ebi-a-GCST90001401	3656
rs406298	19	16409903	G	C	0.5327	0.1135	0.0244	3.38602e-06	IgD- CD27- B cell Absolute Count || id:ebi-a-GCST90001401	3656
rs77126700	20	47313887	C	T	0.0239	0.3825	0.08026	1.95101e-06	IgD- CD27- B cell Absolute Count || id:ebi-a-GCST90001401	3656
rs4239702	20	44749251	C	T	0.6002	0.2841	0.02593	1.6421e-27	IgD- CD27- B cell Absolute Count || id:ebi-a-GCST90001401	3656
rs9615714	22	48376963	G	A	0.1421	-0.1733	0.03486	6.94592e-07	IgD- CD27- B cell Absolute Count || id:ebi-a-GCST90001401	3656
rs72757888	1	233045963	T	C	0.01	-0.5733	0.1213	2.36701e-06	Switched memory B cell %B cell || id:ebi-a-GCST90001402	3657
rs11204752	1	150958133	C	T	0.5387	0.1189	0.02561	3.58501e-06	Switched memory B cell %B cell || id:ebi-a-GCST90001402	3657
rs55658041	4	164291862	T	G	0.0037	1.008	0.2105	1.75102e-06	Switched memory B cell %B cell || id:ebi-a-GCST90001402	3657
rs17405603	5	144608340	T	A	0.2841	-0.1414	0.02795	4.40301e-07	Switched memory B cell %B cell || id:ebi-a-GCST90001402	3657
rs9265880	6	31313054	C	T	0.4717	-0.1543	0.0316	1.096e-06	Switched memory B cell %B cell || id:ebi-a-GCST90001402	3657
rs2450220	8	119323401	T	C	0.816	0.1522	0.03212	2.24698e-06	Switched memory B cell %B cell || id:ebi-a-GCST90001402	3657
rs140191306	9	2570753	T	C	0.0179	-0.4624	0.09477	1.11199e-06	Switched memory B cell %B cell || id:ebi-a-GCST90001402	3657
rs11068290	12	110228055	T	C	0.0231	-0.407	0.08203	7.305e-07	Switched memory B cell %B cell || id:ebi-a-GCST90001402	3657
rs114917376	17	51764168	G	A	0.0958	0.1985	0.04285	3.74197e-06	Switched memory B cell %B cell || id:ebi-a-GCST90001402	3657
rs73426855	17	77637123	C	T	0.1471	0.1769	0.03524	5.427e-07	Switched memory B cell %B cell || id:ebi-a-GCST90001402	3657
rs115414430	2	36720835	G	C	0.0286	0.3537	0.07458	2.19599e-06	Switched memory B cell Absolute Count || id:ebi-a-GCST90001403	3656
rs1519526	2	136967396	C	T	0.1957	0.1511	0.03122	1.34999e-06	Switched memory B cell Absolute Count || id:ebi-a-GCST90001403	3656
rs7595246	2	238554657	C	T	0.1893	0.1458	0.03118	3.01502e-06	Switched memory B cell Absolute Count || id:ebi-a-GCST90001403	3656
rs115218350	3	104146883	A	T	0.0008	-1.838	0.4006	4.61403e-06	Switched memory B cell Absolute Count || id:ebi-a-GCST90001403	3656
rs80076964	4	94935625	C	G	0.0141	0.481	0.1008	1.88499e-06	Switched memory B cell Absolute Count || id:ebi-a-GCST90001403	3656
rs4076316	6	167859623	A	T	0.3005	-0.1251	0.02725	4.53503e-06	Switched memory B cell Absolute Count || id:ebi-a-GCST90001403	3656
rs60508745	7	40554169	C	T	0.5137	-0.1161	0.02496	3.37202e-06	Switched memory B cell Absolute Count || id:ebi-a-GCST90001403	3656
rs11777835	8	144986103	C	T	0.5715	-0.1238	0.02489	6.82606e-07	Switched memory B cell Absolute Count || id:ebi-a-GCST90001403	3656
rs62521107	8	118851954	T	C	0.058	-0.2543	0.05357	2.146e-06	Switched memory B cell Absolute Count || id:ebi-a-GCST90001403	3656
rs2454536	10	53764740	C	T	0.283	-0.1356	0.02771	1.02301e-06	Switched memory B cell Absolute Count || id:ebi-a-GCST90001403	3656
rs192544457	13	42337460	A	G	0.006	0.7964	0.161	7.87209e-07	Switched memory B cell Absolute Count || id:ebi-a-GCST90001403	3656
rs73178168	13	47809629	T	C	0.1703	0.16	0.03344	1.77599e-06	Switched memory B cell Absolute Count || id:ebi-a-GCST90001403	3656
rs9520836	13	108957063	G	A	0.5044	0.1323	0.02454	7.42694e-08	Switched memory B cell Absolute Count || id:ebi-a-GCST90001403	3656
rs11653761	17	2716535	T	G	0.592	-0.1273	0.02469	2.65497e-07	Switched memory B cell Absolute Count || id:ebi-a-GCST90001403	3656
rs421516	17	63135589	A	C	0.9583	-0.2923	0.06252	3.03103e-06	Switched memory B cell Absolute Count || id:ebi-a-GCST90001403	3656
rs77741094	21	42362418	G	C	0.0126	-0.5466	0.1111	9.03192e-07	Switched memory B cell Absolute Count || id:ebi-a-GCST90001403	3656
rs187723151	1	242186219	A	G	0.004	-0.9069	0.1924	2.52e-06	Plasma Blast-Plasma Cell %B cell || id:ebi-a-GCST90001404	3658
rs2792563	1	213100225	A	G	0.5671	-0.1287	0.02511	3.14702e-07	Plasma Blast-Plasma Cell %B cell || id:ebi-a-GCST90001404	3658
rs79423067	4	143873369	T	A	0.0149	0.4869	0.1059	4.44795e-06	Plasma Blast-Plasma Cell %B cell || id:ebi-a-GCST90001404	3658
rs78804535	4	144419847	T	C	0.0316	0.3286	0.07069	3.46897e-06	Plasma Blast-Plasma Cell %B cell || id:ebi-a-GCST90001404	3658
rs140642786	5	148927495	A	G	0.1223	0.1711	0.03733	4.75499e-06	Plasma Blast-Plasma Cell %B cell || id:ebi-a-GCST90001404	3658
rs2019885	5	163177849	C	T	0.1211	-0.1749	0.03747	3.15798e-06	Plasma Blast-Plasma Cell %B cell || id:ebi-a-GCST90001404	3658
rs34629	5	60527506	A	G	0.0633	-0.2427	0.05008	1.31299e-06	Plasma Blast-Plasma Cell %B cell || id:ebi-a-GCST90001404	3658
rs61294310	6	5266557	G	A	0.0124	0.5	0.1092	4.853e-06	Plasma Blast-Plasma Cell %B cell || id:ebi-a-GCST90001404	3658
rs78370279	7	71338898	G	A	0.0104	0.5592	0.1204	3.54103e-06	Plasma Blast-Plasma Cell %B cell || id:ebi-a-GCST90001404	3658
rs74326785	8	24549984	C	T	0.0279	0.3429	0.07479	4.69397e-06	Plasma Blast-Plasma Cell %B cell || id:ebi-a-GCST90001404	3658
rs138542577	8	16074805	C	G	0.0376	0.3534	0.06406	3.708e-08	Plasma Blast-Plasma Cell %B cell || id:ebi-a-GCST90001404	3658
rs4458909	8	118447297	A	G	0.3324	-0.1199	0.02567	3.09599e-06	Plasma Blast-Plasma Cell %B cell || id:ebi-a-GCST90001404	3658
rs12412378	10	130483163	A	C	0.1607	-0.1669	0.0328	3.77798e-07	Plasma Blast-Plasma Cell %B cell || id:ebi-a-GCST90001404	3658
rs185836310	10	73504848	C	T	0.051	-0.257	0.05578	4.23e-06	Plasma Blast-Plasma Cell %B cell || id:ebi-a-GCST90001404	3658
rs55728331	11	117526440	A	G	0.0015	1.708	0.3449	7.60694e-07	Plasma Blast-Plasma Cell %B cell || id:ebi-a-GCST90001404	3658
rs10849436	12	6409619	A	G	0.1595	0.1576	0.0337	3.01599e-06	Plasma Blast-Plasma Cell %B cell || id:ebi-a-GCST90001404	3658
rs62012610	15	34006114	C	G	0.0381	0.2879	0.06268	4.51898e-06	Plasma Blast-Plasma Cell %B cell || id:ebi-a-GCST90001404	3658
rs12709039	16	59861376	A	C	0.7365	-0.1407	0.02784	4.57499e-07	Plasma Blast-Plasma Cell %B cell || id:ebi-a-GCST90001404	3658
rs186329	19	56065534	C	T	0.1706	0.154	0.03221	1.79999e-06	Plasma Blast-Plasma Cell %B cell || id:ebi-a-GCST90001404	3658
rs11089305	22	19729361	G	A	0.2881	0.1338	0.02685	6.51793e-07	Plasma Blast-Plasma Cell %B cell || id:ebi-a-GCST90001404	3658
rs80297308	1	102294391	T	C	0.0015	1.467	0.3075	1.911e-06	Plasma Blast-Plasma Cell Absolute Count || id:ebi-a-GCST90001405	3657
rs74458303	2	121699864	A	G	0.0004	2.692	0.5745	2.89701e-06	Plasma Blast-Plasma Cell Absolute Count || id:ebi-a-GCST90001405	3657
rs148362575	2	187165335	T	A	0.0008	2.566	0.5486	3.02998e-06	Plasma Blast-Plasma Cell Absolute Count || id:ebi-a-GCST90001405	3657
rs62353585	4	168102710	C	T	0.0227	0.3653	0.07865	3.53403e-06	Plasma Blast-Plasma Cell Absolute Count || id:ebi-a-GCST90001405	3657
rs76709581	5	179574693	C	T	0.1061	-0.1773	0.03843	4.06097e-06	Plasma Blast-Plasma Cell Absolute Count || id:ebi-a-GCST90001405	3657
rs61294310	6	5266557	G	A	0.0124	0.5137	0.1072	1.736e-06	Plasma Blast-Plasma Cell Absolute Count || id:ebi-a-GCST90001405	3657
rs74565954	8	24520468	T	C	0.0135	0.4919	0.1035	2.10199e-06	Plasma Blast-Plasma Cell Absolute Count || id:ebi-a-GCST90001405	3657
rs62519719	8	118376967	A	G	0.2815	-0.1239	0.02639	2.791e-06	Plasma Blast-Plasma Cell Absolute Count || id:ebi-a-GCST90001405	3657
rs12412378	10	130483163	A	C	0.1608	-0.16	0.03222	7.18704e-07	Plasma Blast-Plasma Cell Absolute Count || id:ebi-a-GCST90001405	3657
rs17765677	16	65999760	C	T	0.0304	-0.3422	0.07069	1.34499e-06	Plasma Blast-Plasma Cell Absolute Count || id:ebi-a-GCST90001405	3657
rs6014246	20	53613034	A	G	0.3112	-0.1186	0.02577	4.30299e-06	Plasma Blast-Plasma Cell Absolute Count || id:ebi-a-GCST90001405	3657
rs4820558	22	21022887	G	C	0.466	0.1172	0.02408	1.19399e-06	Plasma Blast-Plasma Cell Absolute Count || id:ebi-a-GCST90001405	3657
rs75766272	1	8009985	T	C	0.0201	-0.468	0.08646	6.601e-08	Memory B cell %B cell || id:ebi-a-GCST90001406	3657
rs4658141	1	89814066	C	T	0.3805	-0.1354	0.02587	1.73201e-07	Memory B cell %B cell || id:ebi-a-GCST90001406	3657
rs7412746	1	150860471	T	C	0.5153	-0.138	0.02542	6.03295e-08	Memory B cell %B cell || id:ebi-a-GCST90001406	3657
rs72635970	2	73868977	G	T	0.0444	0.3572	0.06109	5.44703e-09	Memory B cell %B cell || id:ebi-a-GCST90001406	3657
rs72844588	2	138420154	A	G	0.0913	0.2178	0.04314	4.671e-07	Memory B cell %B cell || id:ebi-a-GCST90001406	3657
rs55710170	3	16416145	A	G	0.1181	-0.1745	0.03783	4.11604e-06	Memory B cell %B cell || id:ebi-a-GCST90001406	3657
rs35698683	4	11590243	G	A	0.0447	-0.2768	0.05925	3.09899e-06	Memory B cell %B cell || id:ebi-a-GCST90001406	3657
rs77312528	4	36385921	G	T	0.0107	-0.6233	0.1256	7.26993e-07	Memory B cell %B cell || id:ebi-a-GCST90001406	3657
rs895377	5	58050530	A	G	0.3683	-0.1351	0.02599	2.13e-07	Memory B cell %B cell || id:ebi-a-GCST90001406	3657
rs690488	5	40183220	A	C	0.8588	0.1701	0.03602	2.43703e-06	Memory B cell %B cell || id:ebi-a-GCST90001406	3657
rs115405874	5	119742816	G	A	0.0037	0.9926	0.2014	8.60994e-07	Memory B cell %B cell || id:ebi-a-GCST90001406	3657
rs62398379	6	37585447	C	T	0.4032	0.1256	0.0259	1.28301e-06	Memory B cell %B cell || id:ebi-a-GCST90001406	3657
rs9270558	6	32560667	A	G	0.5249	-0.1488	0.03249	4.79899e-06	Memory B cell %B cell || id:ebi-a-GCST90001406	3657
rs9492229	6	129409652	C	T	0.9556	0.3141	0.06101	2.74998e-07	Memory B cell %B cell || id:ebi-a-GCST90001406	3657
rs145123647	10	26959594	T	C	0.003	-1.082	0.2244	1.48898e-06	Memory B cell %B cell || id:ebi-a-GCST90001406	3657
rs112570989	12	2866164	T	C	0.0149	-0.4739	0.1022	3.63203e-06	Memory B cell %B cell || id:ebi-a-GCST90001406	3657
rs9584780	13	98901269	C	T	0.0257	0.3691	0.07708	1.754e-06	Memory B cell %B cell || id:ebi-a-GCST90001406	3657
rs76477280	13	50147180	G	A	0.0206	0.4292	0.08807	1.14301e-06	Memory B cell %B cell || id:ebi-a-GCST90001406	3657
rs116844769	14	65713895	A	G	0.0662	0.2839	0.05066	2.26199e-08	Memory B cell %B cell || id:ebi-a-GCST90001406	3657
rs77762131	14	96205838	C	G	0.045	0.2733	0.05819	2.73401e-06	Memory B cell %B cell || id:ebi-a-GCST90001406	3657
rs16867231	2	181050023	A	G	0.0108	0.538	0.1157	3.44897e-06	Memory B cell Absolute Count || id:ebi-a-GCST90001407	3656
rs17708396	5	148410250	A	C	0.0005	2.504	0.522	1.67699e-06	Memory B cell Absolute Count || id:ebi-a-GCST90001407	3656
rs2879633	10	53757050	A	G	0.2884	-0.1301	0.02775	2.84302e-06	Memory B cell Absolute Count || id:ebi-a-GCST90001407	3656
rs557577736	13	46224092	G	A	0.001	1.829	0.3891	2.68701e-06	Memory B cell Absolute Count || id:ebi-a-GCST90001407	3656
rs12874404	13	108993494	G	A	0.3256	0.173	0.02661	9.13903e-11	Memory B cell Absolute Count || id:ebi-a-GCST90001407	3656
rs61997631	14	104600920	G	C	0.0432	-0.2972	0.06141	1.357e-06	Memory B cell Absolute Count || id:ebi-a-GCST90001407	3656
rs77762131	14	96205838	C	G	0.045	0.2713	0.05795	2.94503e-06	Memory B cell Absolute Count || id:ebi-a-GCST90001407	3656
rs139196765	15	24733764	G	A	0.0025	1.204	0.2523	1.89802e-06	Memory B cell Absolute Count || id:ebi-a-GCST90001407	3656
rs11653761	17	2716535	T	G	0.592	-0.1161	0.02478	2.93799e-06	Memory B cell Absolute Count || id:ebi-a-GCST90001407	3656
rs144295598	22	45164171	A	G	0.0103	0.6102	0.1207	4.46303e-07	Memory B cell Absolute Count || id:ebi-a-GCST90001407	3656
rs9614226	22	44688150	G	T	0.9792	-0.4235	0.08713	1.22101e-06	Memory B cell Absolute Count || id:ebi-a-GCST90001407	3656
rs4658141	1	89814066	C	T	0.3805	0.1371	0.0259	1.28499e-07	Naive-mature B cell %B cell || id:ebi-a-GCST90001408	3657
rs7412746	1	150860471	T	C	0.5153	0.1312	0.02547	2.74802e-07	Naive-mature B cell %B cell || id:ebi-a-GCST90001408	3657
rs75766272	1	8009985	T	C	0.0201	0.463	0.0866	9.55103e-08	Naive-mature B cell %B cell || id:ebi-a-GCST90001408	3657
rs72844588	2	138420154	A	G	0.0913	-0.2131	0.04321	8.50492e-07	Naive-mature B cell %B cell || id:ebi-a-GCST90001408	3657
rs13421263	2	169182294	T	C	0.0528	0.2616	0.05638	3.61801e-06	Naive-mature B cell %B cell || id:ebi-a-GCST90001408	3657
rs72635970	2	73868977	G	T	0.0444	-0.3399	0.06121	3.01301e-08	Naive-mature B cell %B cell || id:ebi-a-GCST90001408	3657
rs77312528	4	36385921	G	T	0.0107	0.6035	0.1258	1.68101e-06	Naive-mature B cell %B cell || id:ebi-a-GCST90001408	3657
rs115405874	5	119742816	G	A	0.0037	-1.013	0.2016	5.36896e-07	Naive-mature B cell %B cell || id:ebi-a-GCST90001408	3657
rs690488	5	40183220	A	C	0.8588	-0.1667	0.03608	3.98502e-06	Naive-mature B cell %B cell || id:ebi-a-GCST90001408	3657
rs895377	5	58050530	A	G	0.3683	0.1314	0.02603	4.65297e-07	Naive-mature B cell %B cell || id:ebi-a-GCST90001408	3657
rs62398379	6	37585447	C	T	0.4032	-0.1251	0.02593	1.46201e-06	Naive-mature B cell %B cell || id:ebi-a-GCST90001408	3657
rs9492229	6	129409652	C	T	0.9556	-0.3012	0.06111	8.684e-07	Naive-mature B cell %B cell || id:ebi-a-GCST90001408	3657
rs145123647	10	26959594	T	C	0.003	1.077	0.2247	1.71902e-06	Naive-mature B cell %B cell || id:ebi-a-GCST90001408	3657
rs2334904	11	132133144	A	G	0.114	0.1801	0.03937	4.91405e-06	Naive-mature B cell %B cell || id:ebi-a-GCST90001408	3657
rs112570989	12	2866164	T	C	0.0149	0.4852	0.1023	2.19099e-06	Naive-mature B cell %B cell || id:ebi-a-GCST90001408	3657
rs76477280	13	50147180	G	A	0.0206	-0.4222	0.08821	1.76498e-06	Naive-mature B cell %B cell || id:ebi-a-GCST90001408	3657
rs9584780	13	98901269	C	T	0.0257	-0.388	0.07717	5.199e-07	Naive-mature B cell %B cell || id:ebi-a-GCST90001408	3657
rs77762131	14	96205838	C	G	0.045	-0.2722	0.05828	3.10099e-06	Naive-mature B cell %B cell || id:ebi-a-GCST90001408	3657
rs974368	14	63009549	A	G	0.5141	-0.1154	0.025	4.08e-06	Naive-mature B cell %B cell || id:ebi-a-GCST90001408	3657
rs116844769	14	65713895	A	G	0.0662	-0.2677	0.05076	1.41599e-07	Naive-mature B cell %B cell || id:ebi-a-GCST90001408	3657
rs139077655	2	132741527	T	C	0.382	-0.1159	0.02519	4.36697e-06	Naive-mature B cell Absolute Count || id:ebi-a-GCST90001409	3656
rs17056318	5	158285953	C	T	0.081	-0.2366	0.0457	2.36499e-07	Naive-mature B cell Absolute Count || id:ebi-a-GCST90001409	3656
rs35607968	7	67653879	T	C	0.1536	0.1584	0.03419	3.71304e-06	Naive-mature B cell Absolute Count || id:ebi-a-GCST90001409	3656
rs2390504	7	21321670	A	G	0.0486	-0.2668	0.05743	3.51002e-06	Naive-mature B cell Absolute Count || id:ebi-a-GCST90001409	3656
rs143397127	7	12847391	C	T	0.0157	-0.4624	0.09926	3.298e-06	Naive-mature B cell Absolute Count || id:ebi-a-GCST90001409	3656
rs2395904	8	130617819	G	T	0.2657	-0.1445	0.02761	1.74e-07	Naive-mature B cell Absolute Count || id:ebi-a-GCST90001409	3656
rs283340	8	70193536	C	T	0.5621	0.1251	0.02477	4.59505e-07	Naive-mature B cell Absolute Count || id:ebi-a-GCST90001409	3656
rs189761842	10	125485345	T	C	0.0055	0.7902	0.1709	3.91796e-06	Naive-mature B cell Absolute Count || id:ebi-a-GCST90001409	3656
rs12799241	11	119980729	A	G	0.2619	0.138	0.02805	9.06797e-07	Naive-mature B cell Absolute Count || id:ebi-a-GCST90001409	3656
rs58114937	12	67638132	G	A	0.1302	0.1702	0.0363	2.84499e-06	Naive-mature B cell Absolute Count || id:ebi-a-GCST90001409	3656
rs9564767	13	71534535	G	A	0.6075	-0.1163	0.02507	3.62602e-06	Naive-mature B cell Absolute Count || id:ebi-a-GCST90001409	3656
rs77983244	17	7316027	A	G	0.0325	-0.3088	0.06711	4.341e-06	Naive-mature B cell Absolute Count || id:ebi-a-GCST90001409	3656
rs62067029	17	38038391	T	A	0.4148	-0.1605	0.02868	2.34601e-08	Naive-mature B cell Absolute Count || id:ebi-a-GCST90001409	3656
rs62115322	19	53848484	G	C	0.2083	0.1382	0.02968	3.31002e-06	Naive-mature B cell Absolute Count || id:ebi-a-GCST90001409	3656
rs34764986	20	59926554	C	T	0.0699	-0.2347	0.04805	1.08201e-06	Naive-mature B cell Absolute Count || id:ebi-a-GCST90001409	3656
rs2792563	1	213100225	A	G	0.567	-0.1407	0.02479	1.494e-08	IgD- CD38+ B cell %B cell || id:ebi-a-GCST90001410	3657
rs12636371	3	125894785	A	G	0.4619	0.1185	0.02414	9.60993e-07	IgD- CD38+ B cell %B cell || id:ebi-a-GCST90001410	3657
rs12493961	3	11244825	G	A	0.0219	0.3884	0.08136	1.883e-06	IgD- CD38+ B cell %B cell || id:ebi-a-GCST90001410	3657
rs76912165	5	92965344	G	A	0.0209	0.4094	0.08778	3.21699e-06	IgD- CD38+ B cell %B cell || id:ebi-a-GCST90001410	3657
rs139843122	6	107939307	T	A	0.0123	-0.5032	0.1082	3.39899e-06	IgD- CD38+ B cell %B cell || id:ebi-a-GCST90001410	3657
rs148377259	7	106306631	C	T	0.034	-0.3437	0.06603	2.037e-07	IgD- CD38+ B cell %B cell || id:ebi-a-GCST90001410	3657
rs10270812	7	68026886	C	T	0.5103	-0.118	0.0244	1.38599e-06	IgD- CD38+ B cell %B cell || id:ebi-a-GCST90001410	3657
rs138542577	8	16074805	C	G	0.0376	0.3227	0.06331	3.63898e-07	IgD- CD38+ B cell %B cell || id:ebi-a-GCST90001410	3657
rs137930158	8	109663198	C	G	0.007	-0.6636	0.1413	2.76102e-06	IgD- CD38+ B cell %B cell || id:ebi-a-GCST90001410	3657
rs478251	11	127827727	C	A	0.1333	0.1745	0.03499	6.44496e-07	IgD- CD38+ B cell %B cell || id:ebi-a-GCST90001410	3657
rs238926	11	113975210	A	G	0.369	-0.1152	0.02506	4.39805e-06	IgD- CD38+ B cell %B cell || id:ebi-a-GCST90001410	3657
rs7185719	16	59859266	G	C	0.732	-0.1257	0.02735	4.43803e-06	IgD- CD38+ B cell %B cell || id:ebi-a-GCST90001410	3657
rs11705673	22	45016637	G	C	0.12	0.1701	0.0368	3.95103e-06	IgD- CD38+ B cell %B cell || id:ebi-a-GCST90001410	3657
rs75766272	1	8009985	T	C	0.0201	-0.4552	0.08737	1.99402e-07	IgD+ CD24+ B cell %B cell || id:ebi-a-GCST90001411	3657
rs34418535	6	32553200	G	A	0.064	0.4368	0.09069	1.52398e-06	IgD+ CD24+ B cell %B cell || id:ebi-a-GCST90001411	3657
rs9369326	6	42013868	C	T	0.3121	-0.1237	0.02675	3.92103e-06	IgD+ CD24+ B cell %B cell || id:ebi-a-GCST90001411	3657
rs62562996	9	21576571	A	G	0.0172	-0.4312	0.09145	2.51102e-06	IgD+ CD24+ B cell %B cell || id:ebi-a-GCST90001411	3657
rs112570989	12	2866164	T	C	0.0149	-0.4808	0.1031	3.23601e-06	IgD+ CD24+ B cell %B cell || id:ebi-a-GCST90001411	3657
rs12874404	13	108993494	G	A	0.3257	0.1313	0.027	1.20301e-06	IgD+ CD24+ B cell %B cell || id:ebi-a-GCST90001411	3657
rs7988851	13	51367583	T	C	0.3266	-0.1353	0.02683	4.79204e-07	IgD+ CD24+ B cell %B cell || id:ebi-a-GCST90001411	3657
rs76477280	13	50147180	G	A	0.0206	0.4747	0.08918	1.07999e-07	IgD+ CD24+ B cell %B cell || id:ebi-a-GCST90001411	3657
rs77762131	14	96205838	C	G	0.045	0.2816	0.05855	1.567e-06	IgD+ CD24+ B cell %B cell || id:ebi-a-GCST90001411	3657
rs17256322	16	4127619	A	T	0.3234	0.1207	0.02634	4.73097e-06	IgD+ CD24+ B cell %B cell || id:ebi-a-GCST90001411	3657
rs7586359	2	237195419	G	T	0.8907	-0.1868	0.03837	1.16899e-06	IgD+ CD24+ B cell Absolute Count || id:ebi-a-GCST90001412	3656
rs13132141	4	156739300	A	G	0.6385	-0.1191	0.02557	3.304e-06	IgD+ CD24+ B cell Absolute Count || id:ebi-a-GCST90001412	3656
rs147556975	5	148456360	T	C	0.039	-0.3012	0.06251	1.508e-06	IgD+ CD24+ B cell Absolute Count || id:ebi-a-GCST90001412	3656
rs4702913	5	4700587	C	A	0.9123	0.197	0.04215	3.07999e-06	IgD+ CD24+ B cell Absolute Count || id:ebi-a-GCST90001412	3656
rs183466766	13	108710731	A	G	0.0402	0.3121	0.06005	2.14299e-07	IgD+ CD24+ B cell Absolute Count || id:ebi-a-GCST90001412	3656
rs139981802	13	108488351	C	T	0.0418	0.3005	0.05978	5.22998e-07	IgD+ CD24+ B cell Absolute Count || id:ebi-a-GCST90001412	3656
rs557577736	13	46224092	G	A	0.001	1.819	0.3815	1.91898e-06	IgD+ CD24+ B cell Absolute Count || id:ebi-a-GCST90001412	3656
rs145371905	13	70325772	T	G	0.0194	0.4292	0.08767	1.02101e-06	IgD+ CD24+ B cell Absolute Count || id:ebi-a-GCST90001412	3656
rs9314892	13	114873368	G	A	0.8553	-0.1608	0.03478	3.926e-06	IgD+ CD24+ B cell Absolute Count || id:ebi-a-GCST90001412	3656
rs12874404	13	108993494	G	A	0.3256	0.1963	0.02601	5.61824e-14	IgD+ CD24+ B cell Absolute Count || id:ebi-a-GCST90001412	3656
rs73192651	13	50212885	T	C	0.02	0.4428	0.08724	4.05005e-07	IgD+ CD24+ B cell Absolute Count || id:ebi-a-GCST90001412	3656
rs8014978	14	94936964	C	T	0.5737	-0.1136	0.02446	3.565e-06	IgD+ CD24+ B cell Absolute Count || id:ebi-a-GCST90001412	3656
rs77762131	14	96205838	C	G	0.045	0.291	0.05685	3.22404e-07	IgD+ CD24+ B cell Absolute Count || id:ebi-a-GCST90001412	3656
rs880312	16	8963501	A	G	0.1034	-0.1821	0.03971	4.67897e-06	IgD+ CD24+ B cell Absolute Count || id:ebi-a-GCST90001412	3656
rs11653761	17	2716535	T	G	0.592	-0.125	0.02429	2.83302e-07	IgD+ CD24+ B cell Absolute Count || id:ebi-a-GCST90001412	3656
rs9614226	22	44688150	G	T	0.9792	-0.4122	0.08546	1.46501e-06	IgD+ CD24+ B cell Absolute Count || id:ebi-a-GCST90001412	3656
rs111237501	1	163272701	C	T	0.003	1.055	0.2248	2.813e-06	IgD- CD24- B cell %B cell || id:ebi-a-GCST90001413	3657
rs13020544	2	217809198	A	G	0.0004	-2.752	0.5674	1.287e-06	IgD- CD24- B cell %B cell || id:ebi-a-GCST90001413	3657
rs145137909	2	215618238	A	G	0.0004	-2.77	0.5672	1.087e-06	IgD- CD24- B cell %B cell || id:ebi-a-GCST90001413	3657
rs114209430	4	83018399	C	T	0.0085	-0.6384	0.136	2.75797e-06	IgD- CD24- B cell %B cell || id:ebi-a-GCST90001413	3657
rs17044633	4	113331648	G	A	0.0286	0.3561	0.07517	2.256e-06	IgD- CD24- B cell %B cell || id:ebi-a-GCST90001413	3657
rs183821560	5	62072324	A	G	0.0016	-1.841	0.3885	2.25102e-06	IgD- CD24- B cell %B cell || id:ebi-a-GCST90001413	3657
rs9398107	6	107155687	G	A	0.0555	0.2678	0.0552	1.274e-06	IgD- CD24- B cell %B cell || id:ebi-a-GCST90001413	3657
rs76377003	8	112881828	G	A	0.0219	-0.3971	0.08574	3.76296e-06	IgD- CD24- B cell %B cell || id:ebi-a-GCST90001413	3657
rs112898282	10	28462184	C	T	0.0152	0.4712	0.1007	2.97201e-06	IgD- CD24- B cell %B cell || id:ebi-a-GCST90001413	3657
rs7966251	12	103731395	A	G	0.1349	0.1908	0.03619	1.43199e-07	IgD- CD24- B cell %B cell || id:ebi-a-GCST90001413	3657
rs8109503	19	19073798	A	T	0.0919	-0.2029	0.04406	4.27297e-06	IgD- CD24- B cell %B cell || id:ebi-a-GCST90001413	3657
rs6073000	20	41777449	C	T	0.959	-0.3098	0.06272	8.163e-07	IgD- CD24- B cell %B cell || id:ebi-a-GCST90001413	3657
rs72953104	1	41379583	G	C	0.0643	0.2344	0.05087	4.19701e-06	IgD- CD24- B cell Absolute Count || id:ebi-a-GCST90001414	3656
rs111237501	1	163272701	C	T	0.003	1.052	0.2261	3.34703e-06	IgD- CD24- B cell Absolute Count || id:ebi-a-GCST90001414	3656
rs4697616	4	25767183	A	G	0.6779	0.1246	0.02682	3.53403e-06	IgD- CD24- B cell Absolute Count || id:ebi-a-GCST90001414	3656
rs74356874	5	22936562	A	G	0.0066	0.6821	0.1488	4.73598e-06	IgD- CD24- B cell Absolute Count || id:ebi-a-GCST90001414	3656
rs145638783	6	1238442	A	G	0.0033	-0.9851	0.2144	4.469e-06	IgD- CD24- B cell Absolute Count || id:ebi-a-GCST90001414	3656
rs7982713	13	71376322	G	A	0.2157	-0.1482	0.03033	1.068e-06	IgD- CD24- B cell Absolute Count || id:ebi-a-GCST90001414	3656
rs191543445	14	31505138	G	A	0.031	0.3337	0.07236	4.14295e-06	IgD- CD24- B cell Absolute Count || id:ebi-a-GCST90001414	3656
rs496760	15	54695686	A	G	0.6422	0.1331	0.02656	5.69102e-07	IgD- CD24- B cell Absolute Count || id:ebi-a-GCST90001414	3656
rs421516	17	63135589	A	C	0.9583	-0.2921	0.06361	4.54496e-06	IgD- CD24- B cell Absolute Count || id:ebi-a-GCST90001414	3656
rs451367	19	16412842	C	T	0.7674	-0.146	0.0296	8.51805e-07	IgD- CD24- B cell Absolute Count || id:ebi-a-GCST90001414	3656
rs11184230	1	105159724	T	C	0.1095	-0.1946	0.03983	1.083e-06	IgD+ CD24- B cell %B cell || id:ebi-a-GCST90001415	3657
rs7412746	1	150860471	T	C	0.5153	0.1263	0.02588	1.11199e-06	IgD+ CD24- B cell %B cell || id:ebi-a-GCST90001415	3657
rs75766272	1	8009985	T	C	0.0201	0.483	0.08768	3.86002e-08	IgD+ CD24- B cell %B cell || id:ebi-a-GCST90001415	3657
rs45608038	2	73679013	G	A	0.0421	-0.2927	0.06326	3.85496e-06	IgD+ CD24- B cell %B cell || id:ebi-a-GCST90001415	3657
rs56335940	3	106579815	A	G	0.1326	-0.1728	0.03773	4.83905e-06	IgD+ CD24- B cell %B cell || id:ebi-a-GCST90001415	3657
rs533239981	8	75515052	C	G	0.0387	0.3029	0.06589	4.42802e-06	IgD+ CD24- B cell %B cell || id:ebi-a-GCST90001415	3657
rs7870388	9	8660693	G	C	0.7737	-0.142	0.03034	2.97303e-06	IgD+ CD24- B cell %B cell || id:ebi-a-GCST90001415	3657
rs140191306	9	2570753	T	C	0.0179	0.4404	0.09513	3.804e-06	IgD+ CD24- B cell %B cell || id:ebi-a-GCST90001415	3657
rs116844769	14	65713895	A	G	0.0662	-0.2773	0.0514	7.29693e-08	IgD+ CD24- B cell %B cell || id:ebi-a-GCST90001415	3657
rs73426855	17	77637123	C	T	0.1471	-0.1632	0.03539	4.13904e-06	IgD+ CD24- B cell %B cell || id:ebi-a-GCST90001415	3657
rs2159343	17	49451837	G	A	0.6266	-0.1247	0.02639	2.37197e-06	IgD+ CD24- B cell %B cell || id:ebi-a-GCST90001415	3657
rs71615254	4	178658413	C	A	0.0406	-0.2989	0.06147	1.21099e-06	IgD+ CD24- B cell Absolute Count || id:ebi-a-GCST90001416	3656
rs17056318	5	158285953	C	T	0.081	-0.2103	0.04553	3.98602e-06	IgD+ CD24- B cell Absolute Count || id:ebi-a-GCST90001416	3656
rs12197153	6	100821460	A	G	0.0007	2.118	0.4501	2.63099e-06	IgD+ CD24- B cell Absolute Count || id:ebi-a-GCST90001416	3656
rs9354413	6	67039330	C	T	0.2964	0.138	0.02729	4.42099e-07	IgD+ CD24- B cell Absolute Count || id:ebi-a-GCST90001416	3656
rs34910780	7	77469688	T	A	0.048	-0.2677	0.05716	2.94198e-06	IgD+ CD24- B cell Absolute Count || id:ebi-a-GCST90001416	3656
rs2395904	8	130617819	G	T	0.2657	-0.1335	0.0275	1.26e-06	IgD+ CD24- B cell Absolute Count || id:ebi-a-GCST90001416	3656
rs117190494	8	75563339	A	G	0.022	0.4148	0.08139	3.642e-07	IgD+ CD24- B cell Absolute Count || id:ebi-a-GCST90001416	3656
rs12799241	11	119980729	A	G	0.2619	0.132	0.02794	2.391e-06	IgD+ CD24- B cell Absolute Count || id:ebi-a-GCST90001416	3656
rs34771848	12	14302579	T	C	0.023	-0.3693	0.08033	4.43598e-06	IgD+ CD24- B cell Absolute Count || id:ebi-a-GCST90001416	3656
rs3811215	14	22954777	T	G	0.3032	-0.1264	0.02685	2.59801e-06	IgD+ CD24- B cell Absolute Count || id:ebi-a-GCST90001416	3656
rs73426855	17	77637123	C	T	0.1469	-0.1616	0.03458	3.09699e-06	IgD+ CD24- B cell Absolute Count || id:ebi-a-GCST90001416	3656
rs62067029	17	38038391	T	A	0.4148	-0.1593	0.02856	2.61198e-08	IgD+ CD24- B cell Absolute Count || id:ebi-a-GCST90001416	3656
rs7412746	1	150860471	T	C	0.5153	-0.1301	0.02547	3.41099e-07	CD24+ CD27+ B cell %B cell || id:ebi-a-GCST90001417	3657
rs72758947	1	207087053	G	A	0.0641	-0.2365	0.05101	3.67401e-06	CD24+ CD27+ B cell %B cell || id:ebi-a-GCST90001417	3657
rs4658141	1	89814066	C	T	0.3805	-0.1269	0.02592	1.009e-06	CD24+ CD27+ B cell %B cell || id:ebi-a-GCST90001417	3657
rs75766272	1	8009985	T	C	0.0201	-0.4865	0.08656	2.04899e-08	CD24+ CD27+ B cell %B cell || id:ebi-a-GCST90001417	3657
rs45608038	2	73679013	G	A	0.0421	0.3527	0.0624	1.71002e-08	CD24+ CD27+ B cell %B cell || id:ebi-a-GCST90001417	3657
rs72844588	2	138420154	A	G	0.0913	0.2066	0.04322	1.826e-06	CD24+ CD27+ B cell %B cell || id:ebi-a-GCST90001417	3657
rs145442262	3	186702869	A	G	0.0906	-0.2083	0.04276	1.15001e-06	CD24+ CD27+ B cell %B cell || id:ebi-a-GCST90001417	3657
rs35698683	4	11590243	G	A	0.0447	-0.293	0.05931	8.17504e-07	CD24+ CD27+ B cell %B cell || id:ebi-a-GCST90001417	3657
rs115405874	5	119742816	G	A	0.0037	0.9325	0.2017	3.925e-06	CD24+ CD27+ B cell %B cell || id:ebi-a-GCST90001417	3657
rs681014	5	140636323	C	T	0.9966	0.9614	0.207	3.52298e-06	CD24+ CD27+ B cell %B cell || id:ebi-a-GCST90001417	3657
rs10743163	11	11033950	A	G	0.4035	-0.1205	0.02541	2.20699e-06	CD24+ CD27+ B cell %B cell || id:ebi-a-GCST90001417	3657
rs76477280	13	50147180	G	A	0.0206	0.4892	0.08811	3.02803e-08	CD24+ CD27+ B cell %B cell || id:ebi-a-GCST90001417	3657
rs77762131	14	96205838	C	G	0.045	0.2675	0.05828	4.59896e-06	CD24+ CD27+ B cell %B cell || id:ebi-a-GCST90001417	3657
rs116844769	14	65713895	A	G	0.0662	0.2482	0.05078	1.064e-06	CD24+ CD27+ B cell %B cell || id:ebi-a-GCST90001417	3657
rs7221794	17	76979729	A	G	0.1574	-0.1563	0.03395	4.29903e-06	CD24+ CD27+ B cell %B cell || id:ebi-a-GCST90001417	3657
rs75766272	1	8009985	T	C	0.0201	-0.4055	0.08609	2.56998e-06	CD24+ CD27+ B cell Absolute Count || id:ebi-a-GCST90001418	3656
rs17708396	5	148410250	A	C	0.0005	2.539	0.5201	1.09499e-06	CD24+ CD27+ B cell Absolute Count || id:ebi-a-GCST90001418	3656
rs56033406	6	41084740	T	C	0.0349	0.312	0.06692	3.22901e-06	CD24+ CD27+ B cell Absolute Count || id:ebi-a-GCST90001418	3656
rs4076316	6	167859623	A	T	0.3005	-0.1404	0.02729	2.83798e-07	CD24+ CD27+ B cell Absolute Count || id:ebi-a-GCST90001418	3656
rs118092259	8	89432719	G	T	0.0414	-0.2901	0.06345	4.97898e-06	CD24+ CD27+ B cell Absolute Count || id:ebi-a-GCST90001418	3656
rs10762541	10	53790461	T	C	0.772	0.1488	0.02978	6.08695e-07	CD24+ CD27+ B cell Absolute Count || id:ebi-a-GCST90001418	3656
rs138329462	12	11634360	A	G	0.0174	-0.4374	0.09365	3.10799e-06	CD24+ CD27+ B cell Absolute Count || id:ebi-a-GCST90001418	3656
rs557577736	13	46224092	G	A	0.001	1.818	0.3878	2.869e-06	CD24+ CD27+ B cell Absolute Count || id:ebi-a-GCST90001418	3656
rs12874404	13	108993494	G	A	0.3256	0.1691	0.02653	2.04202e-10	CD24+ CD27+ B cell Absolute Count || id:ebi-a-GCST90001418	3656
rs73192651	13	50212885	T	C	0.02	0.4411	0.08893	7.38193e-07	CD24+ CD27+ B cell Absolute Count || id:ebi-a-GCST90001418	3656
rs77762131	14	96205838	C	G	0.045	0.2815	0.05774	1.12699e-06	CD24+ CD27+ B cell Absolute Count || id:ebi-a-GCST90001418	3656
rs11653761	17	2716535	T	G	0.592	-0.118	0.0247	1.84001e-06	CD24+ CD27+ B cell Absolute Count || id:ebi-a-GCST90001418	3656
rs144295598	22	45164171	A	G	0.0103	0.5664	0.1203	2.59902e-06	CD24+ CD27+ B cell Absolute Count || id:ebi-a-GCST90001418	3656
rs529500582	1	11620068	A	G	0.0254	-0.4047	0.08262	1.009e-06	CD20- B cell %B cell || id:ebi-a-GCST90001419	3658
rs187723151	1	242186219	A	G	0.004	-0.9447	0.1934	1.07999e-06	CD20- B cell %B cell || id:ebi-a-GCST90001419	3658
rs58352426	3	154090291	A	G	0.2246	0.1401	0.02947	2.07998e-06	CD20- B cell %B cell || id:ebi-a-GCST90001419	3658
rs316122	5	93014071	C	G	0.0372	0.2993	0.06479	3.971e-06	CD20- B cell %B cell || id:ebi-a-GCST90001419	3658
rs9270911	6	32572202	T	C	0.6083	0.1364	0.02871	2.10499e-06	CD20- B cell %B cell || id:ebi-a-GCST90001419	3658
rs118084343	11	17687837	G	A	0.0547	-0.2663	0.0544	1.02901e-06	CD20- B cell %B cell || id:ebi-a-GCST90001419	3658
rs4244568	15	39319915	G	T	0.3414	-0.1233	0.02622	2.67399e-06	CD20- B cell %B cell || id:ebi-a-GCST90001419	3658
rs140134875	15	80306120	A	C	0.0011	-1.694	0.3528	1.639e-06	CD20- B cell %B cell || id:ebi-a-GCST90001419	3658
rs2107459	16	74140113	A	C	0.0853	0.2021	0.04383	4.17503e-06	CD20- B cell %B cell || id:ebi-a-GCST90001419	3658
rs7265879	20	6103341	G	C	0.0778	-0.2182	0.04616	2.35798e-06	CD20- B cell %B cell || id:ebi-a-GCST90001419	3658
rs115156019	1	168227395	T	C	0.0081	-0.6197	0.1242	6.33199e-07	IgD- CD38+ B cell Absolute Count || id:ebi-a-GCST90001420	3656
rs138158989	2	204476635	A	G	0.0018	-1.339	0.2832	2.33099e-06	IgD- CD38+ B cell Absolute Count || id:ebi-a-GCST90001420	3656
rs148362575	2	187165335	T	A	0.0008	2.541	0.5292	1.64101e-06	IgD- CD38+ B cell Absolute Count || id:ebi-a-GCST90001420	3656
rs66491584	3	20980398	A	G	0.1991	-0.1466	0.02957	7.43293e-07	IgD- CD38+ B cell Absolute Count || id:ebi-a-GCST90001420	3656
rs138058221	7	132571443	T	C	0.0068	-0.6658	0.1449	4.47497e-06	IgD- CD38+ B cell Absolute Count || id:ebi-a-GCST90001420	3656
rs10815908	9	8537763	T	G	0.0511	0.2526	0.0538	2.75797e-06	IgD- CD38+ B cell Absolute Count || id:ebi-a-GCST90001420	3656
rs912755	10	7484185	C	G	0.9996	-2.494	0.5255	2.16202e-06	IgD- CD38+ B cell Absolute Count || id:ebi-a-GCST90001420	3656
rs478251	11	127827727	C	A	0.1332	0.1689	0.03431	8.85503e-07	IgD- CD38+ B cell Absolute Count || id:ebi-a-GCST90001420	3656
rs147319637	11	111211623	A	G	0.0094	-0.5657	0.1224	3.92401e-06	IgD- CD38+ B cell Absolute Count || id:ebi-a-GCST90001420	3656
rs17037450	12	106098314	A	G	0.0264	-0.3311	0.07236	4.90501e-06	IgD- CD38+ B cell Absolute Count || id:ebi-a-GCST90001420	3656
rs2075365	12	31092966	A	G	0.6518	-0.1142	0.02477	4.14801e-06	IgD- CD38+ B cell Absolute Count || id:ebi-a-GCST90001420	3656
rs74011406	15	47631034	A	G	0.093	0.1928	0.04113	2.869e-06	IgD- CD38+ B cell Absolute Count || id:ebi-a-GCST90001420	3656
rs57641238	2	75536553	C	G	0.2252	-0.1546	0.02937	1.47999e-07	CD20- B cell Absolute Count || id:ebi-a-GCST90001421	3657
rs36123742	3	133253719	T	A	0.6555	0.1193	0.02587	4.11396e-06	CD20- B cell Absolute Count || id:ebi-a-GCST90001421	3657
rs74786971	4	90909176	C	G	0.0645	0.2348	0.04935	2.031e-06	CD20- B cell Absolute Count || id:ebi-a-GCST90001421	3657
rs116699251	5	142419461	A	G	0.0446	-0.2732	0.05861	3.24399e-06	CD20- B cell Absolute Count || id:ebi-a-GCST90001421	3657
rs7773849	6	128553518	G	A	0.0018	1.508	0.2808	8.31209e-08	CD20- B cell Absolute Count || id:ebi-a-GCST90001421	3657
rs9273241	6	32614025	T	C	0.5975	0.177	0.03455	3.17001e-07	CD20- B cell Absolute Count || id:ebi-a-GCST90001421	3657
rs38182	7	15900650	T	C	0.1693	-0.1541	0.03305	3.21203e-06	CD20- B cell Absolute Count || id:ebi-a-GCST90001421	3657
rs6586822	8	19139514	C	T	0.6508	-0.1182	0.02568	4.34901e-06	CD20- B cell Absolute Count || id:ebi-a-GCST90001421	3657
rs16936840	11	19531128	T	C	0.102	0.1881	0.04049	3.49897e-06	CD20- B cell Absolute Count || id:ebi-a-GCST90001421	3657
rs77553819	13	24882401	C	G	0.2863	-0.1249	0.0269	3.51901e-06	CD20- B cell Absolute Count || id:ebi-a-GCST90001421	3657
rs71431666	14	95266847	C	G	0.0946	-0.1932	0.04158	3.49398e-06	CD20- B cell Absolute Count || id:ebi-a-GCST90001421	3657
rs2637364	17	32078878	C	T	0.6221	-0.1164	0.02513	3.75301e-06	CD20- B cell Absolute Count || id:ebi-a-GCST90001421	3657
rs6029245	20	39267990	C	T	0.0358	0.3071	0.06585	3.23102e-06	CD20- B cell Absolute Count || id:ebi-a-GCST90001421	3657
rs75839951	2	34491589	G	T	0.0585	-0.2476	0.05192	1.92801e-06	CD20- CD38- B cell %B cell || id:ebi-a-GCST90001422	3659
rs182720746	4	113092883	T	C	0.0089	0.6255	0.1314	2.014e-06	CD20- CD38- B cell %B cell || id:ebi-a-GCST90001422	3659
rs2215848	4	25065221	A	G	0.0118	0.524	0.1121	3.06902e-06	CD20- CD38- B cell %B cell || id:ebi-a-GCST90001422	3659
rs2339996	5	173070505	A	G	0.7803	-0.1471	0.0287	3.11602e-07	CD20- CD38- B cell %B cell || id:ebi-a-GCST90001422	3659
rs72492305	6	32509333	T	C	0.6663	0.2125	0.04192	4.18803e-07	CD20- CD38- B cell %B cell || id:ebi-a-GCST90001422	3659
rs55767134	10	17048435	C	G	0.1838	-0.1463	0.03122	2.90202e-06	CD20- CD38- B cell %B cell || id:ebi-a-GCST90001422	3659
rs34666228	11	123385425	T	G	0.2346	0.1355	0.02809	1.45902e-06	CD20- CD38- B cell %B cell || id:ebi-a-GCST90001422	3659
rs78301150	12	82233392	A	G	0.0033	-1.069	0.2213	1.42099e-06	CD20- CD38- B cell %B cell || id:ebi-a-GCST90001422	3659
rs55897487	12	261706	T	C	0.0016	-1.342	0.2897	3.73104e-06	CD20- CD38- B cell %B cell || id:ebi-a-GCST90001422	3659
rs117308259	14	31993501	C	T	0.0066	-0.8348	0.1494	2.48199e-08	CD20- CD38- B cell %B cell || id:ebi-a-GCST90001422	3659
rs17099538	14	33254318	C	T	0.0559	-0.2409	0.05156	3.093e-06	CD20- CD38- B cell %B cell || id:ebi-a-GCST90001422	3659
rs16955339	17	52971060	T	G	0.0377	0.293	0.06221	2.56803e-06	CD20- CD38- B cell %B cell || id:ebi-a-GCST90001422	3659
rs6125184	20	46576714	A	G	0.5914	-0.1186	0.02463	1.547e-06	CD20- CD38- B cell %B cell || id:ebi-a-GCST90001422	3659
rs62311900	4	74145187	T	C	0.1736	-0.1537	0.03175	1.33801e-06	CD20- CD38- B cell Absolute Count || id:ebi-a-GCST90001423	3658
rs2339996	5	173070505	A	G	0.7802	-0.1438	0.02887	6.60496e-07	CD20- CD38- B cell Absolute Count || id:ebi-a-GCST90001423	3658
rs72492305	6	32509333	T	C	0.6662	0.2112	0.04169	4.25402e-07	CD20- CD38- B cell Absolute Count || id:ebi-a-GCST90001423	3658
rs6906886	6	85038851	A	T	0.903	0.1893	0.04063	3.29299e-06	CD20- CD38- B cell Absolute Count || id:ebi-a-GCST90001423	3658
rs11203884	8	17516564	T	C	0.1643	-0.1548	0.03269	2.26898e-06	CD20- CD38- B cell Absolute Count || id:ebi-a-GCST90001423	3658
rs10988372	9	132193568	C	G	0.2045	0.139	0.03012	4.08602e-06	CD20- CD38- B cell Absolute Count || id:ebi-a-GCST90001423	3658
rs118073973	9	19948908	A	T	0.0402	0.2899	0.06184	2.87303e-06	CD20- CD38- B cell Absolute Count || id:ebi-a-GCST90001423	3658
rs75609575	11	97639659	A	G	0.0349	-0.3072	0.06608	3.45096e-06	CD20- CD38- B cell Absolute Count || id:ebi-a-GCST90001423	3658
rs308820	11	88142031	C	T	0.7571	-0.1305	0.02844	4.63095e-06	CD20- CD38- B cell Absolute Count || id:ebi-a-GCST90001423	3658
rs61906277	11	123384801	G	A	0.2347	0.1435	0.02825	3.99098e-07	CD20- CD38- B cell Absolute Count || id:ebi-a-GCST90001423	3658
rs117308259	14	31993501	C	T	0.0066	-0.6917	0.1504	4.39896e-06	CD20- CD38- B cell Absolute Count || id:ebi-a-GCST90001423	3658
rs16955339	17	52971060	T	G	0.0377	0.3095	0.06249	7.67397e-07	CD20- CD38- B cell Absolute Count || id:ebi-a-GCST90001423	3658
rs143109147	1	40387371	C	T	0.0004	2.746	0.5892	3.27198e-06	IgD+ B cell %Lymphocyte || id:ebi-a-GCST90001424	3657
rs16837671	2	206655953	G	T	0.0494	-0.2827	0.05702	7.43207e-07	IgD+ B cell %Lymphocyte || id:ebi-a-GCST90001424	3657
rs76845048	5	115785493	C	A	0.0357	-0.3021	0.06594	4.76299e-06	IgD+ B cell %Lymphocyte || id:ebi-a-GCST90001424	3657
rs4361609	6	31240635	C	G	0.1131	-0.2101	0.04223	6.78297e-07	IgD+ B cell %Lymphocyte || id:ebi-a-GCST90001424	3657
rs73078428	7	20106029	A	T	0.1318	-0.1651	0.03606	4.854e-06	IgD+ B cell %Lymphocyte || id:ebi-a-GCST90001424	3657
rs34910780	7	77469688	T	A	0.0481	-0.2739	0.05642	1.25101e-06	IgD+ B cell %Lymphocyte || id:ebi-a-GCST90001424	3657
rs2395904	8	130617819	G	T	0.2657	-0.1285	0.02712	2.243e-06	IgD+ B cell %Lymphocyte || id:ebi-a-GCST90001424	3657
rs1977295	10	7188484	A	G	0.5273	0.1101	0.02357	3.11401e-06	IgD+ B cell %Lymphocyte || id:ebi-a-GCST90001424	3657
rs116906133	13	100023905	G	A	0.0037	-1.032	0.2178	2.22398e-06	IgD+ B cell %Lymphocyte || id:ebi-a-GCST90001424	3657
rs12874404	13	108993494	G	A	0.3257	0.1898	0.02599	3.43084e-13	IgD+ B cell %Lymphocyte || id:ebi-a-GCST90001424	3657
rs2402519	14	95373465	C	G	0.1523	0.1596	0.03359	2.10402e-06	IgD+ B cell %Lymphocyte || id:ebi-a-GCST90001424	3657
rs11657531	17	2731370	T	C	0.4882	-0.1468	0.0236	5.52497e-10	IgD+ B cell %Lymphocyte || id:ebi-a-GCST90001424	3657
rs12939565	17	38038389	T	A	0.4267	-0.142	0.02747	2.45499e-07	IgD+ B cell %Lymphocyte || id:ebi-a-GCST90001424	3657
rs55658072	19	14873284	G	A	0.6218	0.1165	0.02499	3.23601e-06	IgD+ B cell %Lymphocyte || id:ebi-a-GCST90001424	3657
rs6131010	20	44724305	G	A	0.6172	-0.1212	0.02568	2.47098e-06	IgD+ B cell %Lymphocyte || id:ebi-a-GCST90001424	3657
rs970081	1	213101844	A	G	0.6517	-0.1191	0.02482	1.64801e-06	IgD- CD38+ B cell %lymphocyte || id:ebi-a-GCST90001425	3656
rs78196740	1	63802723	C	T	0.0929	0.192	0.04079	2.59998e-06	IgD- CD38+ B cell %lymphocyte || id:ebi-a-GCST90001425	3656
rs148362575	2	187165335	T	A	0.0008	2.567	0.5384	1.93299e-06	IgD- CD38+ B cell %lymphocyte || id:ebi-a-GCST90001425	3656
rs138158989	2	204476635	A	G	0.0018	-1.324	0.2808	2.49799e-06	IgD- CD38+ B cell %lymphocyte || id:ebi-a-GCST90001425	3656
rs66491584	3	20980398	A	G	0.1991	-0.1404	0.02948	1.97702e-06	IgD- CD38+ B cell %lymphocyte || id:ebi-a-GCST90001425	3656
rs79812543	3	157649504	A	G	0.0197	0.3801	0.08244	4.16198e-06	IgD- CD38+ B cell %lymphocyte || id:ebi-a-GCST90001425	3656
rs151009998	3	11712287	A	G	0.0379	0.2925	0.06183	2.32498e-06	IgD- CD38+ B cell %lymphocyte || id:ebi-a-GCST90001425	3656
rs76624801	6	41935797	C	A	0.0007	-2.09	0.45	3.53199e-06	IgD- CD38+ B cell %lymphocyte || id:ebi-a-GCST90001425	3656
rs187459109	6	40333488	A	G	0.0008	-1.987	0.4026	8.31706e-07	IgD- CD38+ B cell %lymphocyte || id:ebi-a-GCST90001425	3656
rs75346886	7	127285830	T	G	0.0294	0.3296	0.06986	2.48199e-06	IgD- CD38+ B cell %lymphocyte || id:ebi-a-GCST90001425	3656
rs148377259	7	106306631	C	T	0.0341	-0.311	0.06449	1.47001e-06	IgD- CD38+ B cell %lymphocyte || id:ebi-a-GCST90001425	3656
rs12340211	9	8531036	G	C	0.0518	0.2558	0.05361	1.907e-06	IgD- CD38+ B cell %lymphocyte || id:ebi-a-GCST90001425	3656
rs7294591	12	52932031	T	C	0.5412	0.1168	0.02391	1.086e-06	IgD- CD38+ B cell %lymphocyte || id:ebi-a-GCST90001425	3656
rs11609248	12	14317207	G	A	0.1916	-0.1438	0.02996	1.64801e-06	IgD- CD38+ B cell %lymphocyte || id:ebi-a-GCST90001425	3656
rs72686093	14	22129890	T	C	0.0382	0.2941	0.06126	1.64101e-06	IgD- CD38+ B cell %lymphocyte || id:ebi-a-GCST90001425	3656
rs4785074	16	59885737	T	C	0.635	-0.1289	0.02471	1.91898e-07	IgD- CD38+ B cell %lymphocyte || id:ebi-a-GCST90001425	3656
rs72834736	16	81821361	C	G	0.0248	0.3562	0.07723	4.11604e-06	IgD- CD38+ B cell %lymphocyte || id:ebi-a-GCST90001425	3656
rs76348547	22	31013921	T	G	0.0207	0.3941	0.0823	1.74699e-06	IgD- CD38+ B cell %lymphocyte || id:ebi-a-GCST90001425	3656
rs143785715	1	19500582	T	C	0.0027	1.034	0.2251	4.55302e-06	IgD- CD38dim B cell %lymphocyte || id:ebi-a-GCST90001426	3656
rs10922490	1	89286072	C	T	0.0164	0.516	0.1044	8.15793e-07	IgD- CD38dim B cell %lymphocyte || id:ebi-a-GCST90001426	3656
rs11687597	2	136926146	G	A	0.2069	0.1644	0.03007	4.86004e-08	IgD- CD38dim B cell %lymphocyte || id:ebi-a-GCST90001426	3656
rs7595246	2	238554657	C	T	0.1893	0.1571	0.03041	2.509e-07	IgD- CD38dim B cell %lymphocyte || id:ebi-a-GCST90001426	3656
rs71612685	4	100279851	G	A	0.0126	0.5092	0.1088	2.94002e-06	IgD- CD38dim B cell %lymphocyte || id:ebi-a-GCST90001426	3656
rs17405603	5	144608340	T	A	0.2842	-0.1275	0.02694	2.27898e-06	IgD- CD38dim B cell %lymphocyte || id:ebi-a-GCST90001426	3656
rs146936090	6	41401285	T	C	0.0008	1.843	0.3841	1.66498e-06	IgD- CD38dim B cell %lymphocyte || id:ebi-a-GCST90001426	3656
rs6972846	7	22048853	T	G	0.3885	-0.1185	0.02475	1.736e-06	IgD- CD38dim B cell %lymphocyte || id:ebi-a-GCST90001426	3656
rs78027513	7	154618679	T	G	0.0414	0.2746	0.05995	4.77595e-06	IgD- CD38dim B cell %lymphocyte || id:ebi-a-GCST90001426	3656
rs7840395	8	144984956	G	A	0.5715	-0.1408	0.02438	8.25296e-09	IgD- CD38dim B cell %lymphocyte || id:ebi-a-GCST90001426	3656
rs72816858	10	22940992	C	G	0.0172	0.4384	0.09254	2.24099e-06	IgD- CD38dim B cell %lymphocyte || id:ebi-a-GCST90001426	3656
rs12298227	12	54786414	C	T	0.1013	-0.2055	0.04122	6.51193e-07	IgD- CD38dim B cell %lymphocyte || id:ebi-a-GCST90001426	3656
rs9520836	13	108957063	G	A	0.5044	0.1281	0.02404	1.05201e-07	IgD- CD38dim B cell %lymphocyte || id:ebi-a-GCST90001426	3656
rs118086652	15	76646870	G	A	0.0213	0.38	0.08281	4.61095e-06	IgD- CD38dim B cell %lymphocyte || id:ebi-a-GCST90001426	3656
rs11653761	17	2716535	T	G	0.592	-0.1257	0.02411	1.93201e-07	IgD- CD38dim B cell %lymphocyte || id:ebi-a-GCST90001426	3656
rs61790670	1	84127219	A	C	0.23	0.1517	0.02904	1.83802e-07	IgD- CD38- B cell %lymphocyte || id:ebi-a-GCST90001427	3656
rs12128328	1	59700800	C	T	0.2113	0.1428	0.0306	3.17497e-06	IgD- CD38- B cell %lymphocyte || id:ebi-a-GCST90001427	3656
rs6723786	2	238550072	G	A	0.2924	0.1403	0.02729	2.84302e-07	IgD- CD38- B cell %lymphocyte || id:ebi-a-GCST90001427	3656
rs114551034	2	66709035	A	G	0.0509	-0.2723	0.05703	1.86698e-06	IgD- CD38- B cell %lymphocyte || id:ebi-a-GCST90001427	3656
rs72942964	4	134727496	T	C	0.0021	-1.231	0.2689	4.85601e-06	IgD- CD38- B cell %lymphocyte || id:ebi-a-GCST90001427	3656
rs17405603	5	144608340	T	A	0.2842	-0.1322	0.0277	1.88599e-06	IgD- CD38- B cell %lymphocyte || id:ebi-a-GCST90001427	3656
rs11777835	8	144986103	C	T	0.5715	-0.1246	0.02505	6.83392e-07	IgD- CD38- B cell %lymphocyte || id:ebi-a-GCST90001427	3656
rs190799514	8	55620993	C	T	0.0272	0.391	0.07669	3.59104e-07	IgD- CD38- B cell %lymphocyte || id:ebi-a-GCST90001427	3656
rs814418	8	9936753	T	C	0.0907	0.204	0.04436	4.40099e-06	IgD- CD38- B cell %lymphocyte || id:ebi-a-GCST90001427	3656
rs12426629	12	54797571	G	C	0.0989	-0.1952	0.04268	4.95199e-06	IgD- CD38- B cell %lymphocyte || id:ebi-a-GCST90001427	3656
rs9514859	13	109144845	C	G	0.4402	0.1207	0.025	1.43999e-06	IgD- CD38- B cell %lymphocyte || id:ebi-a-GCST90001427	3656
rs12874404	13	108993494	G	A	0.3256	0.1408	0.02668	1.378e-07	IgD- CD38- B cell %lymphocyte || id:ebi-a-GCST90001427	3656
rs11653761	17	2716535	T	G	0.592	-0.1169	0.0249	2.77997e-06	IgD- CD38- B cell %lymphocyte || id:ebi-a-GCST90001427	3656
rs7236090	18	60947111	C	T	0.5922	0.1163	0.02497	3.33096e-06	IgD- CD38- B cell %lymphocyte || id:ebi-a-GCST90001427	3656
rs77741094	21	42362418	G	C	0.0126	-0.5436	0.1119	1.24e-06	IgD- CD38- B cell %lymphocyte || id:ebi-a-GCST90001427	3656
rs112904733	1	214958496	T	G	0.0956	0.1953	0.04221	3.85496e-06	IgD- CD38dim B cell %B cell || id:ebi-a-GCST90001428	3657
rs9424499	1	233050029	C	G	0.0109	-0.5857	0.1138	2.81002e-07	IgD- CD38dim B cell %B cell || id:ebi-a-GCST90001428	3657
rs16832731	2	136864703	A	G	0.1987	0.1484	0.03147	2.48599e-06	IgD- CD38dim B cell %B cell || id:ebi-a-GCST90001428	3657
rs73205209	3	106275239	C	T	0.0334	0.3323	0.07083	2.81799e-06	IgD- CD38dim B cell %B cell || id:ebi-a-GCST90001428	3657
rs111854570	3	8695105	A	G	0.0388	-0.2872	0.06245	4.40697e-06	IgD- CD38dim B cell %B cell || id:ebi-a-GCST90001428	3657
rs17405749	5	144609363	T	C	0.2374	-0.1389	0.02884	1.51098e-06	IgD- CD38dim B cell %B cell || id:ebi-a-GCST90001428	3657
rs75273600	6	125594743	A	G	0.0093	0.6398	0.1253	3.46497e-07	IgD- CD38dim B cell %B cell || id:ebi-a-GCST90001428	3657
rs2397752	10	132983821	T	C	0.248	-0.136	0.02815	1.41101e-06	IgD- CD38dim B cell %B cell || id:ebi-a-GCST90001428	3657
rs80216562	11	128322602	A	G	0.029	-0.3698	0.07231	3.31002e-07	IgD- CD38dim B cell %B cell || id:ebi-a-GCST90001428	3657
rs10743163	11	11033950	A	G	0.4035	-0.1167	0.02529	4.11396e-06	IgD- CD38dim B cell %B cell || id:ebi-a-GCST90001428	3657
rs4038038	13	19499423	A	G	0.359	0.1177	0.02529	3.36202e-06	IgD- CD38dim B cell %B cell || id:ebi-a-GCST90001428	3657
rs11548656	16	81916912	G	A	0.1288	-0.1701	0.0366	3.48097e-06	IgD- CD38dim B cell %B cell || id:ebi-a-GCST90001428	3657
rs75659776	17	49605668	T	C	0.0515	0.2621	0.05581	2.73697e-06	IgD- CD38dim B cell %B cell || id:ebi-a-GCST90001428	3657
rs11682311	2	16464977	C	T	0.3243	-0.1278	0.02599	9.105e-07	IgD+ CD38+ B cell %lymphocyte || id:ebi-a-GCST90001429	3656
rs140380950	2	105587803	C	T	0.0368	-0.3597	0.06402	2.067e-08	IgD+ CD38+ B cell %lymphocyte || id:ebi-a-GCST90001429	3656
rs76112278	4	15915069	A	G	0.0194	-0.4243	0.08741	1.25901e-06	IgD+ CD38+ B cell %lymphocyte || id:ebi-a-GCST90001429	3656
rs78658073	5	498773	A	G	0.001	1.792	0.3659	1.011e-06	IgD+ CD38+ B cell %lymphocyte || id:ebi-a-GCST90001429	3656
rs80330977	5	158276610	A	G	0.0814	-0.2327	0.04501	2.46598e-07	IgD+ CD38+ B cell %lymphocyte || id:ebi-a-GCST90001429	3656
rs76660971	5	18919526	A	G	0.2299	-0.1368	0.02874	2.02502e-06	IgD+ CD38+ B cell %lymphocyte || id:ebi-a-GCST90001429	3656
rs117772462	7	48791017	A	T	0.0159	-0.4644	0.09659	1.58599e-06	IgD+ CD38+ B cell %lymphocyte || id:ebi-a-GCST90001429	3656
rs11185560	7	190115	A	G	0.9375	-0.2347	0.05014	2.95597e-06	IgD+ CD38+ B cell %lymphocyte || id:ebi-a-GCST90001429	3656
rs10103048	8	130602281	C	A	0.7321	0.126	0.02692	2.988e-06	IgD+ CD38+ B cell %lymphocyte || id:ebi-a-GCST90001429	3656
rs1695681	8	118255950	A	C	0.5309	-0.1213	0.02451	7.75908e-07	IgD+ CD38+ B cell %lymphocyte || id:ebi-a-GCST90001429	3656
rs10832409	11	15377699	A	G	0.1722	0.1495	0.03227	3.73603e-06	IgD+ CD38+ B cell %lymphocyte || id:ebi-a-GCST90001429	3656
rs11068290	12	110228055	T	C	0.0231	0.3875	0.07937	1.08901e-06	IgD+ CD38+ B cell %lymphocyte || id:ebi-a-GCST90001429	3656
rs59879144	12	75564449	A	C	0.0161	-0.4624	0.09688	1.88599e-06	IgD+ CD38+ B cell %lymphocyte || id:ebi-a-GCST90001429	3656
rs3811315	14	22499870	A	T	0.1157	0.1771	0.03756	2.503e-06	IgD+ CD38+ B cell %lymphocyte || id:ebi-a-GCST90001429	3656
rs2216762	16	84759446	C	T	0.8141	-0.1525	0.03097	8.88403e-07	IgD+ CD38+ B cell %lymphocyte || id:ebi-a-GCST90001429	3656
rs60521331	17	8639905	A	G	0.5022	0.1158	0.02425	1.86299e-06	IgD+ CD38+ B cell %lymphocyte || id:ebi-a-GCST90001429	3656
rs143109147	1	40387371	C	T	0.0004	2.959	0.5843	4.27701e-07	IgD+ CD38dim B cell %lymphocyte || id:ebi-a-GCST90001430	3656
rs28399382	3	115393238	T	C	0.1982	0.1411	0.0308	4.74395e-06	IgD+ CD38dim B cell %lymphocyte || id:ebi-a-GCST90001430	3656
rs6831487	4	170331972	G	T	0.4702	0.1165	0.02467	2.42298e-06	IgD+ CD38dim B cell %lymphocyte || id:ebi-a-GCST90001430	3656
rs12516105	5	160198880	C	T	0.1737	0.1502	0.03243	3.75301e-06	IgD+ CD38dim B cell %lymphocyte || id:ebi-a-GCST90001430	3656
rs62474511	7	123275484	T	A	0.0927	0.2018	0.04179	1.417e-06	IgD+ CD38dim B cell %lymphocyte || id:ebi-a-GCST90001430	3656
rs7840067	8	130582787	C	T	0.1978	-0.1537	0.03026	3.95704e-07	IgD+ CD38dim B cell %lymphocyte || id:ebi-a-GCST90001430	3656
rs533239981	8	75515052	C	G	0.0387	0.3011	0.06365	2.32199e-06	IgD+ CD38dim B cell %lymphocyte || id:ebi-a-GCST90001430	3656
rs60953943	8	60077245	A	G	0.0204	-0.4228	0.08863	1.91298e-06	IgD+ CD38dim B cell %lymphocyte || id:ebi-a-GCST90001430	3656
rs76400856	10	56638876	C	A	0.0639	0.2233	0.0485	4.30299e-06	IgD+ CD38dim B cell %lymphocyte || id:ebi-a-GCST90001430	3656
rs74151247	10	97801073	A	C	0.0302	0.348	0.07127	1.09199e-06	IgD+ CD38dim B cell %lymphocyte || id:ebi-a-GCST90001430	3656
rs75319860	12	110312229	C	T	0.0249	0.3651	0.07896	3.91201e-06	IgD+ CD38dim B cell %lymphocyte || id:ebi-a-GCST90001430	3656
rs75474045	13	72428296	A	G	0.0126	0.503	0.1077	3.125e-06	IgD+ CD38dim B cell %lymphocyte || id:ebi-a-GCST90001430	3656
rs12874404	13	108993494	G	A	0.3256	0.1366	0.02617	1.89601e-07	IgD+ CD38dim B cell %lymphocyte || id:ebi-a-GCST90001430	3656
rs116844769	14	65713895	A	G	0.0662	-0.2347	0.04969	2.40099e-06	IgD+ CD38dim B cell %lymphocyte || id:ebi-a-GCST90001430	3656
rs16974449	16	84754964	A	C	0.4851	0.1233	0.02445	4.77903e-07	IgD+ CD38dim B cell %lymphocyte || id:ebi-a-GCST90001430	3656
rs60521331	17	8639905	A	G	0.5022	0.1214	0.02433	6.26095e-07	IgD+ CD38dim B cell %lymphocyte || id:ebi-a-GCST90001430	3656
rs11657531	17	2731370	T	C	0.4884	-0.1167	0.0237	8.83894e-07	IgD+ CD38dim B cell %lymphocyte || id:ebi-a-GCST90001430	3656
rs655580	19	53039110	A	G	0.4571	0.1258	0.02423	2.18902e-07	IgD+ CD38dim B cell %lymphocyte || id:ebi-a-GCST90001430	3656
rs6131010	20	44724305	G	A	0.6172	-0.1184	0.02588	4.94698e-06	IgD+ CD38dim B cell %lymphocyte || id:ebi-a-GCST90001430	3656
rs55708924	21	16767346	G	A	0.0185	-0.4222	0.08736	1.39801e-06	IgD+ CD38dim B cell %lymphocyte || id:ebi-a-GCST90001430	3656
rs142838362	21	47606966	T	C	0.0577	0.2463	0.05243	2.72101e-06	IgD+ CD38dim B cell %lymphocyte || id:ebi-a-GCST90001430	3656
rs35088452	3	8847483	A	C	0.7471	-0.1352	0.02849	2.15899e-06	IgD+ CD38- B cell %lymphocyte || id:ebi-a-GCST90001431	3656
rs6895553	5	114821667	C	T	0.0946	-0.199	0.04272	3.304e-06	IgD+ CD38- B cell %lymphocyte || id:ebi-a-GCST90001431	3656
rs78009119	5	136421498	G	T	0.0137	-0.5085	0.1078	2.49902e-06	IgD+ CD38- B cell %lymphocyte || id:ebi-a-GCST90001431	3656
rs77055472	5	157655991	A	T	0.0495	-0.2682	0.05762	3.36001e-06	IgD+ CD38- B cell %lymphocyte || id:ebi-a-GCST90001431	3656
rs12197754	6	130521070	C	T	0.2014	-0.1427	0.03115	4.74996e-06	IgD+ CD38- B cell %lymphocyte || id:ebi-a-GCST90001431	3656
rs12146653	11	21411891	C	T	0.0964	0.1892	0.04126	4.66305e-06	IgD+ CD38- B cell %lymphocyte || id:ebi-a-GCST90001431	3656
rs12829274	12	129349167	G	A	0.0618	-0.2515	0.05194	1.33999e-06	IgD+ CD38- B cell %lymphocyte || id:ebi-a-GCST90001431	3656
rs3730631	12	69228178	C	T	0.1288	-0.1789	0.03729	1.66399e-06	IgD+ CD38- B cell %lymphocyte || id:ebi-a-GCST90001431	3656
rs12874404	13	108993494	G	A	0.3256	0.1714	0.02663	1.385e-10	IgD+ CD38- B cell %lymphocyte || id:ebi-a-GCST90001431	3656
rs77762131	14	96205838	C	G	0.045	0.3532	0.058	1.24701e-09	IgD+ CD38- B cell %lymphocyte || id:ebi-a-GCST90001431	3656
rs72706301	14	94852219	A	G	0.0179	0.448	0.09406	1.98299e-06	IgD+ CD38- B cell %lymphocyte || id:ebi-a-GCST90001431	3656
rs10444793	15	44517689	A	G	0.0181	-0.4323	0.09225	2.88602e-06	IgD+ CD38- B cell %lymphocyte || id:ebi-a-GCST90001431	3656
rs28594458	17	2728777	G	C	0.4918	-0.1135	0.02418	2.76599e-06	IgD+ CD38- B cell %lymphocyte || id:ebi-a-GCST90001431	3656
rs62235484	21	41083050	A	G	0.0175	0.4662	0.09386	7.13608e-07	IgD+ CD38- B cell %lymphocyte || id:ebi-a-GCST90001431	3656
rs78007261	22	45666517	T	C	0.0379	-0.3003	0.06556	4.80895e-06	IgD+ CD38- B cell %lymphocyte || id:ebi-a-GCST90001431	3656
rs75766272	1	8009985	T	C	0.0201	-0.3961	0.08527	3.51901e-06	Unswitched memory B cell %lymphocyte || id:ebi-a-GCST90001432	3656
rs6557137	6	150197022	T	C	0.1838	-0.1494	0.03221	3.62001e-06	Unswitched memory B cell %lymphocyte || id:ebi-a-GCST90001432	3656
rs2956955	8	1552537	C	T	0.9661	-0.3254	0.06746	1.47099e-06	Unswitched memory B cell %lymphocyte || id:ebi-a-GCST90001432	3656
rs141247883	8	144986071	G	A	0.0319	-0.3185	0.06842	3.34503e-06	Unswitched memory B cell %lymphocyte || id:ebi-a-GCST90001432	3656
rs11794578	9	808529	G	T	0.4521	0.1189	0.02437	1.12101e-06	Unswitched memory B cell %lymphocyte || id:ebi-a-GCST90001432	3656
rs143553941	12	109368119	C	G	0.013	0.501	0.107	2.95801e-06	Unswitched memory B cell %lymphocyte || id:ebi-a-GCST90001432	3656
rs12829274	12	129349167	G	A	0.0618	-0.2536	0.0511	7.30601e-07	Unswitched memory B cell %lymphocyte || id:ebi-a-GCST90001432	3656
rs73192651	13	50212885	T	C	0.02	0.5455	0.08807	6.53597e-10	Unswitched memory B cell %lymphocyte || id:ebi-a-GCST90001432	3656
rs12874404	13	108993494	G	A	0.3256	0.1827	0.02625	4.02346e-12	Unswitched memory B cell %lymphocyte || id:ebi-a-GCST90001432	3656
rs557577736	13	46224092	G	A	0.001	1.799	0.3838	2.857e-06	Unswitched memory B cell %lymphocyte || id:ebi-a-GCST90001432	3656
rs77762131	14	96205838	C	G	0.045	0.3287	0.05701	8.74903e-09	Unswitched memory B cell %lymphocyte || id:ebi-a-GCST90001432	3656
rs8014978	14	94936964	C	T	0.5737	-0.1203	0.02463	1.08201e-06	Unswitched memory B cell %lymphocyte || id:ebi-a-GCST90001432	3656
rs112135308	16	86794463	G	C	0.0174	0.416	0.08833	2.57099e-06	Unswitched memory B cell %lymphocyte || id:ebi-a-GCST90001432	3656
rs11657759	17	2715961	C	A	0.4903	-0.1271	0.02394	1.16099e-07	Unswitched memory B cell %lymphocyte || id:ebi-a-GCST90001432	3656
rs7254039	19	14993354	A	G	0.0435	-0.2695	0.05778	3.20797e-06	Unswitched memory B cell %lymphocyte || id:ebi-a-GCST90001432	3656
rs6032660	20	44730245	A	G	0.6359	-0.1525	0.02629	7.19797e-09	Unswitched memory B cell %lymphocyte || id:ebi-a-GCST90001432	3656
rs55712190	22	22613458	T	C	0.074	0.2264	0.04694	1.467e-06	Unswitched memory B cell %lymphocyte || id:ebi-a-GCST90001432	3656
rs2789568	1	217179038	C	T	0.0706	-0.2462	0.04816	3.32897e-07	IgD- CD27- B cell %lymphocyte || id:ebi-a-GCST90001433	3656
rs113442137	1	160254955	A	G	0.0472	-0.2734	0.0574	1.97301e-06	IgD- CD27- B cell %lymphocyte || id:ebi-a-GCST90001433	3656
rs185621536	1	113524501	T	C	0.0312	-0.3248	0.07016	3.79997e-06	IgD- CD27- B cell %lymphocyte || id:ebi-a-GCST90001433	3656
rs7606024	2	56616595	A	T	0.7882	-0.1469	0.03041	1.42498e-06	IgD- CD27- B cell %lymphocyte || id:ebi-a-GCST90001433	3656
rs35574803	3	32533246	C	T	0.0562	-0.3044	0.05397	1.83101e-08	IgD- CD27- B cell %lymphocyte || id:ebi-a-GCST90001433	3656
rs78756830	4	99437210	C	T	0.0194	0.4221	0.08746	1.45301e-06	IgD- CD27- B cell %lymphocyte || id:ebi-a-GCST90001433	3656
rs12654363	5	84064142	T	C	0.9301	-0.2241	0.04812	3.31398e-06	IgD- CD27- B cell %lymphocyte || id:ebi-a-GCST90001433	3656
rs191610741	6	4201348	T	C	0.0257	-0.3731	0.08152	4.87304e-06	IgD- CD27- B cell %lymphocyte || id:ebi-a-GCST90001433	3656
rs78763642	9	25294308	A	G	0.0279	-0.3442	0.07449	3.96798e-06	IgD- CD27- B cell %lymphocyte || id:ebi-a-GCST90001433	3656
rs2250246	12	6553016	G	A	0.5341	0.1325	0.02454	7.13296e-08	IgD- CD27- B cell %lymphocyte || id:ebi-a-GCST90001433	3656
rs4941188	18	60857029	A	G	0.6726	-0.1285	0.02642	1.20401e-06	IgD- CD27- B cell %lymphocyte || id:ebi-a-GCST90001433	3656
rs111407982	19	8814367	T	C	0.1551	-0.1612	0.03377	1.87499e-06	IgD- CD27- B cell %lymphocyte || id:ebi-a-GCST90001433	3656
rs7260348	19	15011442	C	T	0.0722	-0.2227	0.04722	2.49799e-06	IgD- CD27- B cell %lymphocyte || id:ebi-a-GCST90001433	3656
rs77126700	20	47313887	C	T	0.0239	0.3695	0.08021	4.22698e-06	IgD- CD27- B cell %lymphocyte || id:ebi-a-GCST90001433	3656
rs4810485	20	44747947	G	T	0.6313	0.317	0.02622	4.97966e-33	IgD- CD27- B cell %lymphocyte || id:ebi-a-GCST90001433	3656
rs7595246	2	238554657	C	T	0.1893	0.1684	0.03143	8.91908e-08	Switched memory B cell %lymphocyte || id:ebi-a-GCST90001434	3656
rs1519526	2	136967396	C	T	0.1957	0.1674	0.03168	1.341e-07	Switched memory B cell %lymphocyte || id:ebi-a-GCST90001434	3656
rs7640978	3	32533010	T	C	0.1493	0.1649	0.0355	3.535e-06	Switched memory B cell %lymphocyte || id:ebi-a-GCST90001434	3656
rs17405603	5	144608340	T	A	0.2842	-0.1343	0.02781	1.44202e-06	Switched memory B cell %lymphocyte || id:ebi-a-GCST90001434	3656
rs190799514	8	55620993	C	T	0.0272	0.3656	0.07711	2.20298e-06	Switched memory B cell %lymphocyte || id:ebi-a-GCST90001434	3656
rs7840395	8	144984956	G	A	0.5715	-0.1437	0.02516	1.21099e-08	Switched memory B cell %lymphocyte || id:ebi-a-GCST90001434	3656
rs118076634	11	94589940	T	C	0.0025	1.115	0.2283	1.083e-06	Switched memory B cell %lymphocyte || id:ebi-a-GCST90001434	3656
rs12426629	12	54797571	G	C	0.0989	-0.2182	0.04316	4.52397e-07	Switched memory B cell %lymphocyte || id:ebi-a-GCST90001434	3656
rs9520836	13	108957063	G	A	0.5044	0.1567	0.02479	2.91199e-10	Switched memory B cell %lymphocyte || id:ebi-a-GCST90001434	3656
rs11653761	17	2716535	T	G	0.592	-0.1491	0.02489	2.298e-09	Switched memory B cell %lymphocyte || id:ebi-a-GCST90001434	3656
rs141365416	1	102236814	T	C	0.0005	2.328	0.4961	2.79402e-06	Plasma Blast-Plasma Cell %lymphocyte || id:ebi-a-GCST90001435	3657
rs148362575	2	187165335	T	A	0.0008	2.608	0.5526	2.46598e-06	Plasma Blast-Plasma Cell %lymphocyte || id:ebi-a-GCST90001435	3657
rs116540222	3	117331256	T	C	0.0011	1.756	0.3749	2.922e-06	Plasma Blast-Plasma Cell %lymphocyte || id:ebi-a-GCST90001435	3657
rs7449190	5	1297918	C	T	0.7401	0.1298	0.028	3.66902e-06	Plasma Blast-Plasma Cell %lymphocyte || id:ebi-a-GCST90001435	3657
rs61294310	6	5266557	G	A	0.0124	0.5223	0.1088	1.65299e-06	Plasma Blast-Plasma Cell %lymphocyte || id:ebi-a-GCST90001435	3657
rs13244540	7	151002534	T	G	0.0447	0.2681	0.05848	4.69505e-06	Plasma Blast-Plasma Cell %lymphocyte || id:ebi-a-GCST90001435	3657
rs74326785	8	24549984	C	T	0.0279	0.351	0.07464	2.65497e-06	Plasma Blast-Plasma Cell %lymphocyte || id:ebi-a-GCST90001435	3657
rs3138500	9	92219945	T	C	0.0678	-0.2314	0.04918	2.62398e-06	Plasma Blast-Plasma Cell %lymphocyte || id:ebi-a-GCST90001435	3657
rs12412378	10	130483163	A	C	0.1608	-0.1755	0.03276	9.03795e-08	Plasma Blast-Plasma Cell %lymphocyte || id:ebi-a-GCST90001435	3657
rs55728331	11	117526440	A	G	0.0015	1.624	0.3466	2.90603e-06	Plasma Blast-Plasma Cell %lymphocyte || id:ebi-a-GCST90001435	3657
rs4785074	16	59885737	T	C	0.6349	-0.1403	0.02562	4.61998e-08	Plasma Blast-Plasma Cell %lymphocyte || id:ebi-a-GCST90001435	3657
rs7255292	19	49529379	C	T	0.853	-0.1601	0.035	4.94903e-06	Plasma Blast-Plasma Cell %lymphocyte || id:ebi-a-GCST90001435	3657
rs11089305	22	19729361	G	A	0.2882	0.1295	0.02684	1.45301e-06	Plasma Blast-Plasma Cell %lymphocyte || id:ebi-a-GCST90001435	3657
rs75766272	1	8009985	T	C	0.0201	-0.3971	0.08543	3.46003e-06	Memory B cell %lymphocyte || id:ebi-a-GCST90001436	3656
rs12636848	3	147613080	G	T	0.3031	0.1242	0.02655	2.98401e-06	Memory B cell %lymphocyte || id:ebi-a-GCST90001436	3656
rs143003356	4	142016471	A	G	0.0115	-0.5299	0.1157	4.78597e-06	Memory B cell %lymphocyte || id:ebi-a-GCST90001436	3656
rs17708396	5	148410250	A	C	0.0005	2.518	0.5212	1.41198e-06	Memory B cell %lymphocyte || id:ebi-a-GCST90001436	3656
rs74505387	6	101891742	C	T	0.1057	-0.2033	0.03964	3.08496e-07	Memory B cell %lymphocyte || id:ebi-a-GCST90001436	3656
rs34173062	8	145158607	A	G	0.2153	0.1453	0.02991	1.242e-06	Memory B cell %lymphocyte || id:ebi-a-GCST90001436	3656
rs12763172	10	85447519	C	T	0.7213	0.132	0.02749	1.637e-06	Memory B cell %lymphocyte || id:ebi-a-GCST90001436	3656
rs10791220	11	132145598	G	A	0.1134	-0.1793	0.03894	4.27602e-06	Memory B cell %lymphocyte || id:ebi-a-GCST90001436	3656
rs557577736	13	46224092	G	A	0.001	1.799	0.3851	3.10699e-06	Memory B cell %lymphocyte || id:ebi-a-GCST90001436	3656
rs12874404	13	108993494	G	A	0.3256	0.2221	0.0262	3.31284e-17	Memory B cell %lymphocyte || id:ebi-a-GCST90001436	3656
rs73192651	13	50212885	T	C	0.02	0.442	0.08807	5.43801e-07	Memory B cell %lymphocyte || id:ebi-a-GCST90001436	3656
rs77762131	14	96205838	C	G	0.045	0.3049	0.05737	1.13201e-07	Memory B cell %lymphocyte || id:ebi-a-GCST90001436	3656
rs974368	14	63009549	A	G	0.5141	0.1136	0.02464	4.17004e-06	Memory B cell %lymphocyte || id:ebi-a-GCST90001436	3656
rs139196765	15	24733764	G	A	0.0025	1.237	0.2495	7.49307e-07	Memory B cell %lymphocyte || id:ebi-a-GCST90001436	3656
rs11653761	17	2716535	T	G	0.592	-0.1359	0.02451	3.17497e-08	Memory B cell %lymphocyte || id:ebi-a-GCST90001436	3656
rs7254039	19	14993354	A	G	0.0435	-0.2668	0.05819	4.68004e-06	Memory B cell %lymphocyte || id:ebi-a-GCST90001436	3656
rs551529415	19	1157330	T	C	0.01	-0.5751	0.124	3.62001e-06	Memory B cell %lymphocyte || id:ebi-a-GCST90001436	3656
rs3810559	20	3207749	G	T	0.5444	-0.1132	0.02457	4.24004e-06	Memory B cell %lymphocyte || id:ebi-a-GCST90001436	3656
rs4640493	22	45387786	T	A	0.83	0.1493	0.03234	4.01301e-06	Memory B cell %lymphocyte || id:ebi-a-GCST90001436	3656
rs115204570	5	135756457	T	G	0.0161	-0.479	0.1028	3.26701e-06	Naive-mature B cell %lymphocyte || id:ebi-a-GCST90001437	3656
rs17056318	5	158285953	C	T	0.081	-0.2266	0.04592	8.38591e-07	Naive-mature B cell %lymphocyte || id:ebi-a-GCST90001437	3656
rs35607968	7	67653879	T	C	0.1536	0.1611	0.03434	2.82703e-06	Naive-mature B cell %lymphocyte || id:ebi-a-GCST90001437	3656
rs140197720	7	108191234	T	C	0.0153	0.4648	0.1016	4.93799e-06	Naive-mature B cell %lymphocyte || id:ebi-a-GCST90001437	3656
rs2395904	8	130617819	G	T	0.2657	-0.1504	0.02772	6.15106e-08	Naive-mature B cell %lymphocyte || id:ebi-a-GCST90001437	3656
rs533239981	8	75515052	C	G	0.0387	0.3348	0.06479	2.50098e-07	Naive-mature B cell %lymphocyte || id:ebi-a-GCST90001437	3656
rs2978582	8	35485504	C	T	0.1969	0.1509	0.0316	1.84599e-06	Naive-mature B cell %lymphocyte || id:ebi-a-GCST90001437	3656
rs74151247	10	97801073	A	C	0.0302	0.3341	0.07265	4.39097e-06	Naive-mature B cell %lymphocyte || id:ebi-a-GCST90001437	3656
rs74397782	12	25018659	A	G	0.0343	-0.3176	0.06621	1.679e-06	Naive-mature B cell %lymphocyte || id:ebi-a-GCST90001437	3656
rs78433555	12	107821321	A	C	0.0501	0.2756	0.05706	1.42498e-06	Naive-mature B cell %lymphocyte || id:ebi-a-GCST90001437	3656
rs116844769	14	65713895	A	G	0.0662	-0.2342	0.05066	3.92202e-06	Naive-mature B cell %lymphocyte || id:ebi-a-GCST90001437	3656
rs112850074	14	103229069	G	A	0.031	0.3445	0.07141	1.46299e-06	Naive-mature B cell %lymphocyte || id:ebi-a-GCST90001437	3656
rs4805840	19	33468482	G	A	0.823	-0.1599	0.03309	1.41501e-06	Naive-mature B cell %lymphocyte || id:ebi-a-GCST90001437	3656
rs77848220	1	61251434	T	C	0.0219	0.405	0.08232	9.04191e-07	IgD- CD38dim B cell Absolute Count || id:ebi-a-GCST90001438	3656
rs7595246	2	238554657	C	T	0.1893	0.14	0.03035	4.08602e-06	IgD- CD38dim B cell Absolute Count || id:ebi-a-GCST90001438	3656
rs115414430	2	36720835	G	C	0.0286	0.3388	0.07271	3.29102e-06	IgD- CD38dim B cell Absolute Count || id:ebi-a-GCST90001438	3656
rs1519524	2	136934125	A	T	0.2246	0.141	0.02892	1.12499e-06	IgD- CD38dim B cell Absolute Count || id:ebi-a-GCST90001438	3656
rs141352577	3	8492010	T	C	0.0235	0.3656	0.07671	1.95501e-06	IgD- CD38dim B cell Absolute Count || id:ebi-a-GCST90001438	3656
rs7840395	8	144984956	G	A	0.5715	-0.1267	0.02425	1.85498e-07	IgD- CD38dim B cell Absolute Count || id:ebi-a-GCST90001438	3656
rs16925715	10	53772842	C	T	0.2824	-0.1298	0.02698	1.556e-06	IgD- CD38dim B cell Absolute Count || id:ebi-a-GCST90001438	3656
rs149006488	11	67523715	G	C	0.1496	-0.1579	0.03413	3.83804e-06	IgD- CD38dim B cell Absolute Count || id:ebi-a-GCST90001438	3656
rs61910510	11	130557122	T	C	0.0295	0.3355	0.07014	1.79498e-06	IgD- CD38dim B cell Absolute Count || id:ebi-a-GCST90001438	3656
rs4936106	11	130360402	G	C	0.0289	0.3309	0.07134	3.62602e-06	IgD- CD38dim B cell Absolute Count || id:ebi-a-GCST90001438	3656
rs73178168	13	47809629	T	C	0.1703	0.1583	0.03258	1.23501e-06	IgD- CD38dim B cell Absolute Count || id:ebi-a-GCST90001438	3656
rs192544457	13	42337460	A	G	0.006	0.8492	0.1563	5.91698e-08	IgD- CD38dim B cell Absolute Count || id:ebi-a-GCST90001438	3656
rs9520836	13	108957063	G	A	0.5044	0.1117	0.02394	3.14398e-06	IgD- CD38dim B cell Absolute Count || id:ebi-a-GCST90001438	3656
rs11653761	17	2716535	T	G	0.592	-0.1121	0.02405	3.28897e-06	IgD- CD38dim B cell Absolute Count || id:ebi-a-GCST90001438	3656
rs78893742	20	36100011	A	G	0.0081	0.6139	0.1321	3.47696e-06	IgD- CD38dim B cell Absolute Count || id:ebi-a-GCST90001438	3656
rs75766272	1	8009985	T	C	0.0201	-0.4103	0.08583	1.81899e-06	IgD+ CD24+ B cell %lymphocyte || id:ebi-a-GCST90001439	3656
rs2015983	2	237150166	C	A	0.8771	-0.1746	0.03658	1.874e-06	IgD+ CD24+ B cell %lymphocyte || id:ebi-a-GCST90001439	3656
rs183466766	13	108710731	A	G	0.0402	0.2998	0.06089	8.89693e-07	IgD+ CD24+ B cell %lymphocyte || id:ebi-a-GCST90001439	3656
rs12874404	13	108993494	G	A	0.3256	0.2335	0.02632	1.09295e-18	IgD+ CD24+ B cell %lymphocyte || id:ebi-a-GCST90001439	3656
rs73192651	13	50212885	T	C	0.02	0.4819	0.08877	6.07393e-08	IgD+ CD24+ B cell %lymphocyte || id:ebi-a-GCST90001439	3656
rs77762131	14	96205838	C	G	0.045	0.3082	0.05742	8.52491e-08	IgD+ CD24+ B cell %lymphocyte || id:ebi-a-GCST90001439	3656
rs11657118	17	2714118	C	T	0.475	-0.1428	0.02416	3.70101e-09	IgD+ CD24+ B cell %lymphocyte || id:ebi-a-GCST90001439	3656
rs55756125	1	59740965	C	T	0.2289	0.1417	0.0299	2.21702e-06	IgD- CD24- B cell %lymphocyte || id:ebi-a-GCST90001440	3656
rs72990172	2	238526279	A	G	0.1711	0.1576	0.03306	1.92699e-06	IgD- CD24- B cell %lymphocyte || id:ebi-a-GCST90001440	3656
rs807894	6	164610887	G	T	0.5868	0.1202	0.02568	2.99799e-06	IgD- CD24- B cell %lymphocyte || id:ebi-a-GCST90001440	3656
rs9398107	6	107155687	G	A	0.0555	0.2699	0.05578	1.36301e-06	IgD- CD24- B cell %lymphocyte || id:ebi-a-GCST90001440	3656
rs75464772	6	19788226	T	C	0.0325	-0.328	0.07098	3.94003e-06	IgD- CD24- B cell %lymphocyte || id:ebi-a-GCST90001440	3656
rs73277142	12	11974332	T	C	0.0555	0.2673	0.05558	1.58099e-06	IgD- CD24- B cell %lymphocyte || id:ebi-a-GCST90001440	3656
rs75150138	16	49238584	A	T	0.0517	-0.2581	0.05593	4.05303e-06	IgD- CD24- B cell %lymphocyte || id:ebi-a-GCST90001440	3656
rs11862268	16	81239867	A	G	0.0187	0.4267	0.09042	2.464e-06	IgD- CD24- B cell %lymphocyte || id:ebi-a-GCST90001440	3656
rs58904842	16	3463156	A	C	0.4768	-0.1174	0.02499	2.72101e-06	IgD- CD24- B cell %lymphocyte || id:ebi-a-GCST90001440	3656
rs30146	16	14342183	C	T	0.0198	-0.4244	0.09112	3.30697e-06	IgD- CD24- B cell %lymphocyte || id:ebi-a-GCST90001440	3656
rs8098848	18	60857793	T	C	0.6704	-0.1264	0.02668	2.243e-06	IgD- CD24- B cell %lymphocyte || id:ebi-a-GCST90001440	3656
rs16837671	2	206655953	G	T	0.0494	-0.2649	0.05732	3.95103e-06	IgD+ CD24- B cell %lymphocyte || id:ebi-a-GCST90001441	3656
rs34712193	3	1814140	T	A	0.1644	0.1567	0.03246	1.44501e-06	IgD+ CD24- B cell %lymphocyte || id:ebi-a-GCST90001441	3656
rs140523784	6	16887609	T	C	0.1864	0.1447	0.03153	4.58205e-06	IgD+ CD24- B cell %lymphocyte || id:ebi-a-GCST90001441	3656
rs9354413	6	67039330	C	T	0.2964	0.1258	0.02705	3.44096e-06	IgD+ CD24- B cell %lymphocyte || id:ebi-a-GCST90001441	3656
rs4361609	6	31240635	C	G	0.1131	-0.2163	0.04242	3.57298e-07	IgD+ CD24- B cell %lymphocyte || id:ebi-a-GCST90001441	3656
rs111830700	7	121332400	A	G	0.0377	0.2933	0.0634	3.85896e-06	IgD+ CD24- B cell %lymphocyte || id:ebi-a-GCST90001441	3656
rs34910780	7	77469688	T	A	0.048	-0.282	0.05676	7.03105e-07	IgD+ CD24- B cell %lymphocyte || id:ebi-a-GCST90001441	3656
rs12542190	8	130594761	C	A	0.1943	-0.1572	0.03051	2.72402e-07	IgD+ CD24- B cell %lymphocyte || id:ebi-a-GCST90001441	3656
rs533239981	8	75515052	C	G	0.0387	0.3428	0.06378	8.19502e-08	IgD+ CD24- B cell %lymphocyte || id:ebi-a-GCST90001441	3656
rs76578043	13	105214810	A	G	0.0298	0.3251	0.06938	2.89601e-06	IgD+ CD24- B cell %lymphocyte || id:ebi-a-GCST90001441	3656
rs2994690	14	95363646	C	G	0.2462	0.1312	0.02819	3.38197e-06	IgD+ CD24- B cell %lymphocyte || id:ebi-a-GCST90001441	3656
rs116844769	14	65713895	A	G	0.0662	-0.232	0.04979	3.28103e-06	IgD+ CD24- B cell %lymphocyte || id:ebi-a-GCST90001441	3656
rs9900847	17	2717218	C	T	0.6041	-0.1133	0.02454	4.05602e-06	IgD+ CD24- B cell %lymphocyte || id:ebi-a-GCST90001441	3656
rs12939565	17	38038389	T	A	0.4267	-0.1318	0.02761	1.87098e-06	IgD+ CD24- B cell %lymphocyte || id:ebi-a-GCST90001441	3656
rs4805840	19	33468482	G	A	0.823	-0.152	0.03242	2.85503e-06	IgD+ CD24- B cell %lymphocyte || id:ebi-a-GCST90001441	3656
rs6131010	20	44724305	G	A	0.6172	-0.1285	0.0258	6.64003e-07	IgD+ CD24- B cell %lymphocyte || id:ebi-a-GCST90001441	3656
rs75766272	1	8009985	T	C	0.0201	-0.4263	0.08511	5.73099e-07	CD24+ CD27+ B cell %lymphocyte || id:ebi-a-GCST90001442	3656
rs112542522	2	4031340	A	G	0.0082	0.6143	0.1326	3.72804e-06	CD24+ CD27+ B cell %lymphocyte || id:ebi-a-GCST90001442	3656
rs12636848	3	147613080	G	T	0.3031	0.1237	0.02646	3.02601e-06	CD24+ CD27+ B cell %lymphocyte || id:ebi-a-GCST90001442	3656
rs4689417	4	4392393	A	C	0.2961	-0.1241	0.02671	3.50598e-06	CD24+ CD27+ B cell %lymphocyte || id:ebi-a-GCST90001442	3656
rs17708396	5	148410250	A	C	0.0005	2.517	0.5195	1.31899e-06	CD24+ CD27+ B cell %lymphocyte || id:ebi-a-GCST90001442	3656
rs4076316	6	167859623	A	T	0.3005	-0.1287	0.027	1.95799e-06	CD24+ CD27+ B cell %lymphocyte || id:ebi-a-GCST90001442	3656
rs74505387	6	101891742	C	T	0.1057	-0.1838	0.03954	3.47896e-06	CD24+ CD27+ B cell %lymphocyte || id:ebi-a-GCST90001442	3656
rs144625305	7	7871676	T	C	0.0086	0.6284	0.1342	2.94999e-06	CD24+ CD27+ B cell %lymphocyte || id:ebi-a-GCST90001442	3656
rs6997704	8	140978857	G	A	0.4707	0.1127	0.02386	2.41102e-06	CD24+ CD27+ B cell %lymphocyte || id:ebi-a-GCST90001442	3656
rs4763704	12	11698759	A	G	0.9772	0.3787	0.08058	2.69699e-06	CD24+ CD27+ B cell %lymphocyte || id:ebi-a-GCST90001442	3656
rs12829274	12	129349167	G	A	0.0618	-0.2708	0.05111	1.24099e-07	CD24+ CD27+ B cell %lymphocyte || id:ebi-a-GCST90001442	3656
rs12874404	13	108993494	G	A	0.3256	0.2114	0.02614	8.08537e-16	CD24+ CD27+ B cell %lymphocyte || id:ebi-a-GCST90001442	3656
rs557577736	13	46224092	G	A	0.001	1.814	0.3838	2.37099e-06	CD24+ CD27+ B cell %lymphocyte || id:ebi-a-GCST90001442	3656
rs73192651	13	50212885	T	C	0.02	0.5056	0.08768	8.74601e-09	CD24+ CD27+ B cell %lymphocyte || id:ebi-a-GCST90001442	3656
rs9578529	13	23613190	G	A	0.2676	-0.1323	0.02804	2.48502e-06	CD24+ CD27+ B cell %lymphocyte || id:ebi-a-GCST90001442	3656
rs77762131	14	96205838	C	G	0.045	0.3074	0.05717	8.06102e-08	CD24+ CD27+ B cell %lymphocyte || id:ebi-a-GCST90001442	3656
rs11657759	17	2715961	C	A	0.4903	-0.1352	0.02397	1.80701e-08	CD24+ CD27+ B cell %lymphocyte || id:ebi-a-GCST90001442	3656
rs7254039	19	14993354	A	G	0.0435	-0.2739	0.05798	2.398e-06	CD24+ CD27+ B cell %lymphocyte || id:ebi-a-GCST90001442	3656
rs6712095	2	205623497	T	G	0.0246	0.3643	0.07946	4.70901e-06	CD20- B cell %lymphocyte || id:ebi-a-GCST90001443	3657
rs186229706	4	2029089	T	G	0.0142	0.4826	0.1045	3.96598e-06	CD20- B cell %lymphocyte || id:ebi-a-GCST90001443	3657
rs9273241	6	32614025	T	C	0.5975	0.179	0.0341	1.60801e-07	CD20- B cell %lymphocyte || id:ebi-a-GCST90001443	3657
rs7773849	6	128553518	G	A	0.0018	1.534	0.2821	5.81099e-08	CD20- B cell %lymphocyte || id:ebi-a-GCST90001443	3657
rs72825207	10	62909955	A	T	0.0149	0.513	0.1061	1.37899e-06	CD20- B cell %lymphocyte || id:ebi-a-GCST90001443	3657
rs147937648	12	82008771	T	C	0.0059	-0.7403	0.1583	3.01703e-06	CD20- B cell %lymphocyte || id:ebi-a-GCST90001443	3657
rs77553819	13	24882401	C	G	0.2863	-0.1257	0.02688	2.99999e-06	CD20- B cell %lymphocyte || id:ebi-a-GCST90001443	3657
rs12432015	14	49052782	C	T	0.118	-0.1712	0.0373	4.56899e-06	CD20- B cell %lymphocyte || id:ebi-a-GCST90001443	3657
rs4244568	15	39319915	G	T	0.3414	-0.1244	0.02611	1.98701e-06	CD20- B cell %lymphocyte || id:ebi-a-GCST90001443	3657
rs4782702	16	85477299	G	A	0.9802	0.4085	0.0875	3.145e-06	CD20- B cell %lymphocyte || id:ebi-a-GCST90001443	3657
rs6052993	20	4944838	G	C	0.4371	-0.1132	0.02459	4.25197e-06	CD20- B cell %lymphocyte || id:ebi-a-GCST90001443	3657
rs75839951	2	34491589	G	T	0.0585	-0.2457	0.05199	2.38199e-06	CD20- CD38- B cell %lymphocyte || id:ebi-a-GCST90001444	3658
rs182720746	4	113092883	T	C	0.0089	0.6295	0.1319	1.88599e-06	CD20- CD38- B cell %lymphocyte || id:ebi-a-GCST90001444	3658
rs2339996	5	173070505	A	G	0.7802	-0.1476	0.02879	3.12299e-07	CD20- CD38- B cell %lymphocyte || id:ebi-a-GCST90001444	3658
rs72492305	6	32509333	T	C	0.6662	0.2022	0.0416	1.21899e-06	CD20- CD38- B cell %lymphocyte || id:ebi-a-GCST90001444	3658
rs118073973	9	19948908	A	T	0.0402	0.2924	0.06168	2.20999e-06	CD20- CD38- B cell %lymphocyte || id:ebi-a-GCST90001444	3658
rs55767134	10	17048435	C	G	0.1837	-0.1443	0.03132	4.19402e-06	CD20- CD38- B cell %lymphocyte || id:ebi-a-GCST90001444	3658
rs34666228	11	123385425	T	G	0.2346	0.1512	0.02817	8.46292e-08	CD20- CD38- B cell %lymphocyte || id:ebi-a-GCST90001444	3658
rs78301150	12	82233392	A	G	0.0033	-1.031	0.2228	3.84698e-06	CD20- CD38- B cell %lymphocyte || id:ebi-a-GCST90001444	3658
rs117308259	14	31993501	C	T	0.0066	-0.7613	0.1499	4.02096e-07	CD20- CD38- B cell %lymphocyte || id:ebi-a-GCST90001444	3658
rs16955339	17	52971060	T	G	0.0377	0.3075	0.06234	8.46292e-07	CD20- CD38- B cell %lymphocyte || id:ebi-a-GCST90001444	3658
rs77510701	18	34838106	A	C	0.0484	-0.2605	0.05636	3.92103e-06	CD20- CD38- B cell %lymphocyte || id:ebi-a-GCST90001444	3658
rs80339814	19	53396009	C	T	0.0794	-0.2259	0.04752	2.07501e-06	CD20- CD38- B cell %lymphocyte || id:ebi-a-GCST90001444	3658
rs6125184	20	46576714	A	G	0.5914	-0.1164	0.02472	2.60699e-06	CD20- CD38- B cell %lymphocyte || id:ebi-a-GCST90001444	3658
rs36071180	20	765164	A	G	0.1597	0.1556	0.03334	3.19198e-06	CD20- CD38- B cell %lymphocyte || id:ebi-a-GCST90001444	3658
rs4691920	4	164351901	C	G	0.9962	-0.9757	0.207	2.53303e-06	IgD- CD38- B cell %B cell || id:ebi-a-GCST90001445	3657
rs7726548	5	116807553	G	T	0.103	-0.1903	0.04045	2.64503e-06	IgD- CD38- B cell %B cell || id:ebi-a-GCST90001445	3657
rs17405603	5	144608340	T	A	0.2841	-0.1414	0.02769	3.47296e-07	IgD- CD38- B cell %B cell || id:ebi-a-GCST90001445	3657
rs62417843	6	91779902	C	T	0.0502	-0.2629	0.05605	2.82299e-06	IgD- CD38- B cell %B cell || id:ebi-a-GCST90001445	3657
rs9265864	6	31312747	T	C	0.4642	-0.1444	0.03125	3.97997e-06	IgD- CD38- B cell %B cell || id:ebi-a-GCST90001445	3657
rs2450220	8	119323401	T	C	0.816	0.1668	0.03177	1.60801e-07	IgD- CD38- B cell %B cell || id:ebi-a-GCST90001445	3657
rs140191306	9	2570753	T	C	0.0179	-0.4466	0.09399	2.09701e-06	IgD- CD38- B cell %B cell || id:ebi-a-GCST90001445	3657
rs11068290	12	110228055	T	C	0.0231	-0.3746	0.0813	4.21105e-06	IgD- CD38- B cell %B cell || id:ebi-a-GCST90001445	3657
rs7994585	13	111083495	C	G	0.4839	-0.1137	0.02485	4.94504e-06	IgD- CD38- B cell %B cell || id:ebi-a-GCST90001445	3657
rs7215243	17	78261805	G	A	0.1328	0.1743	0.03642	1.77501e-06	IgD- CD38- B cell %B cell || id:ebi-a-GCST90001445	3657
rs77146037	1	178195174	G	A	0.0472	-0.2726	0.05953	4.81903e-06	IgD- CD38- B cell Absolute Count || id:ebi-a-GCST90001446	3656
rs61790670	1	84127219	A	C	0.23	0.142	0.0294	1.409e-06	IgD- CD38- B cell Absolute Count || id:ebi-a-GCST90001446	3656
rs114551034	2	66709035	A	G	0.0509	-0.2926	0.05767	4.08404e-07	IgD- CD38- B cell Absolute Count || id:ebi-a-GCST90001446	3656
rs115218350	3	104146883	A	T	0.0008	-1.898	0.408	3.408e-06	IgD- CD38- B cell Absolute Count || id:ebi-a-GCST90001446	3656
rs56741207	4	134733663	G	C	0.0018	-1.445	0.2907	7.03704e-07	IgD- CD38- B cell Absolute Count || id:ebi-a-GCST90001446	3656
rs4697617	4	25771115	A	G	0.7103	0.1401	0.02742	3.38602e-07	IgD- CD38- B cell Absolute Count || id:ebi-a-GCST90001446	3656
rs62521107	8	118851954	T	C	0.058	-0.2685	0.05455	8.90902e-07	IgD- CD38- B cell Absolute Count || id:ebi-a-GCST90001446	3656
rs421516	17	63135589	A	C	0.9583	-0.3138	0.06366	8.60399e-07	IgD- CD38- B cell Absolute Count || id:ebi-a-GCST90001446	3656
rs77741094	21	42362418	G	C	0.0126	-0.627	0.1131	3.13899e-08	IgD- CD38- B cell Absolute Count || id:ebi-a-GCST90001446	3656
rs144295598	22	45164171	A	G	0.0103	0.5677	0.1226	3.77703e-06	IgD- CD38- B cell Absolute Count || id:ebi-a-GCST90001446	3656
rs74907325	1	218429679	T	A	0.0666	0.2307	0.04822	1.793e-06	IgD+ CD38+ B cell %B cell || id:ebi-a-GCST90001447	3657
rs16867231	2	181050023	A	G	0.0108	-0.547	0.1138	1.60199e-06	IgD+ CD38+ B cell %B cell || id:ebi-a-GCST90001447	3657
rs140380950	2	105587803	C	T	0.0368	-0.3401	0.06356	9.31001e-08	IgD+ CD38+ B cell %B cell || id:ebi-a-GCST90001447	3657
rs76112278	4	15915069	A	G	0.0194	-0.4136	0.08735	2.26699e-06	IgD+ CD38+ B cell %B cell || id:ebi-a-GCST90001447	3657
rs28393044	4	157437839	G	C	0.0334	0.3089	0.06706	4.24502e-06	IgD+ CD38+ B cell %B cell || id:ebi-a-GCST90001447	3657
rs78658073	5	498773	A	G	0.001	1.714	0.3719	4.15796e-06	IgD+ CD38+ B cell %B cell || id:ebi-a-GCST90001447	3657
rs139996875	5	78010341	T	A	0.0063	0.6715	0.1465	4.689e-06	IgD+ CD38+ B cell %B cell || id:ebi-a-GCST90001447	3657
rs13196511	6	44643196	A	G	0.0913	-0.2113	0.04244	6.72094e-07	IgD+ CD38+ B cell %B cell || id:ebi-a-GCST90001447	3657
rs2362966	10	125560687	C	G	0.0556	-0.2556	0.05243	1.137e-06	IgD+ CD38+ B cell %B cell || id:ebi-a-GCST90001447	3657
rs35060907	10	132636158	T	G	0.1036	-0.1953	0.04025	1.277e-06	IgD+ CD38+ B cell %B cell || id:ebi-a-GCST90001447	3657
rs59879144	12	75564449	A	C	0.0161	-0.4658	0.09637	1.39801e-06	IgD+ CD38+ B cell %B cell || id:ebi-a-GCST90001447	3657
rs4903967	14	81485149	A	G	0.6906	-0.1368	0.02733	5.77697e-07	IgD+ CD38+ B cell %B cell || id:ebi-a-GCST90001447	3657
rs79487320	14	43717096	G	C	0.0074	-0.6854	0.1392	8.87708e-07	IgD+ CD38+ B cell %B cell || id:ebi-a-GCST90001447	3657
rs2216762	16	84759446	C	T	0.8141	-0.1464	0.03092	2.26199e-06	IgD+ CD38+ B cell %B cell || id:ebi-a-GCST90001447	3657
rs8059803	16	81603001	A	G	0.6504	-0.122	0.02577	2.28802e-06	IgD+ CD38+ B cell %B cell || id:ebi-a-GCST90001447	3657
rs72927038	18	51760939	T	C	0.0335	-0.33	0.06793	1.237e-06	IgD+ CD38+ B cell %B cell || id:ebi-a-GCST90001447	3657
rs114693598	1	161500712	T	G	0.1422	-0.1756	0.03803	4.05602e-06	CD11c+ monocyte Absolute Count || id:ebi-a-GCST90001448	3020
rs2404849	1	224272792	G	T	0.7464	0.1562	0.03041	2.98003e-07	CD11c+ monocyte Absolute Count || id:ebi-a-GCST90001448	3020
rs72724781	1	89327063	G	A	0.0041	0.9648	0.2024	1.95299e-06	CD11c+ monocyte Absolute Count || id:ebi-a-GCST90001448	3020
rs3040901	2	79926958	T	C	0.2225	-0.1552	0.03359	3.97796e-06	CD11c+ monocyte Absolute Count || id:ebi-a-GCST90001448	3020
rs2587473	10	72515785	T	C	0.2432	-0.1429	0.0311	4.55198e-06	CD11c+ monocyte Absolute Count || id:ebi-a-GCST90001448	3020
rs9894233	17	45778747	A	T	0.0268	-0.3991	0.08574	3.38197e-06	CD11c+ monocyte Absolute Count || id:ebi-a-GCST90001448	3020
rs113451095	17	9975038	C	T	0.0472	-0.2994	0.06307	2.16601e-06	CD11c+ monocyte Absolute Count || id:ebi-a-GCST90001448	3020
rs150248455	21	46373171	A	G	0.0674	0.25	0.05201	1.59901e-06	CD11c+ monocyte Absolute Count || id:ebi-a-GCST90001448	3020
rs191730825	1	46613239	G	A	0.0292	0.4346	0.08042	7.006e-08	CD11c+ monocyte %monocyte || id:ebi-a-GCST90001449	3043
rs115058278	3	101915678	A	T	0.0168	0.4772	0.1021	3.10699e-06	CD11c+ monocyte %monocyte || id:ebi-a-GCST90001449	3043
rs74610143	3	172744541	T	C	0.0125	0.6366	0.1245	3.36597e-07	CD11c+ monocyte %monocyte || id:ebi-a-GCST90001449	3043
rs35237330	4	182768743	A	G	0.0971	-0.2147	0.04484	1.76901e-06	CD11c+ monocyte %monocyte || id:ebi-a-GCST90001449	3043
rs13241407	7	153684820	G	A	0.0483	-0.28	0.06121	4.94698e-06	CD11c+ monocyte %monocyte || id:ebi-a-GCST90001449	3043
rs11766273	7	22775663	A	G	0.0115	0.591	0.1283	4.23399e-06	CD11c+ monocyte %monocyte || id:ebi-a-GCST90001449	3043
rs73073066	7	23486970	T	C	0.023	0.4148	0.08775	2.377e-06	CD11c+ monocyte %monocyte || id:ebi-a-GCST90001449	3043
rs11610005	12	27966210	G	C	0.4358	-0.124	0.02698	4.532e-06	CD11c+ monocyte %monocyte || id:ebi-a-GCST90001449	3043
rs57566659	12	42973243	C	G	0.0462	0.3158	0.06253	4.66702e-07	CD11c+ monocyte %monocyte || id:ebi-a-GCST90001449	3043
rs76968110	14	31160823	A	G	0.0189	-0.4763	0.0957	6.82402e-07	CD11c+ monocyte %monocyte || id:ebi-a-GCST90001449	3043
rs117909439	14	29918210	T	C	0.0089	-0.6761	0.1414	1.81201e-06	CD11c+ monocyte %monocyte || id:ebi-a-GCST90001449	3043
rs8065103	17	45062476	G	A	0.7212	0.1465	0.02963	8.10793e-07	CD11c+ monocyte %monocyte || id:ebi-a-GCST90001449	3043
rs35149557	20	5421681	C	T	0.198	0.1579	0.03301	1.79602e-06	CD11c+ monocyte %monocyte || id:ebi-a-GCST90001449	3043
rs4656708	1	169701466	C	A	0.0459	-0.3696	0.0647	1.21801e-08	CD62L- monocyte Absolute Count || id:ebi-a-GCST90001450	3019
rs4987369	1	169662742	T	G	0.2774	0.2378	0.03006	3.6116e-15	CD62L- monocyte Absolute Count || id:ebi-a-GCST90001450	3019
rs62167331	2	56524393	A	G	0.0341	-0.347	0.07464	3.47896e-06	CD62L- monocyte Absolute Count || id:ebi-a-GCST90001450	3019
rs13068785	3	74703663	T	C	0.0581	0.269	0.05861	4.61604e-06	CD62L- monocyte Absolute Count || id:ebi-a-GCST90001450	3019
rs11935230	4	136447876	C	G	0.1686	0.1842	0.03607	3.498e-07	CD62L- monocyte Absolute Count || id:ebi-a-GCST90001450	3019
rs11249570	5	177033794	A	G	0.4581	-0.1525	0.02632	7.66302e-09	CD62L- monocyte Absolute Count || id:ebi-a-GCST90001450	3019
rs79930588	5	6308011	G	T	0.0015	1.724	0.3525	1.048e-06	CD62L- monocyte Absolute Count || id:ebi-a-GCST90001450	3019
rs528135834	7	41362245	G	T	0.0056	0.859	0.1829	2.75201e-06	CD62L- monocyte Absolute Count || id:ebi-a-GCST90001450	3019
rs4484736	8	66059237	A	G	0.7173	-0.1386	0.03012	4.36797e-06	CD62L- monocyte Absolute Count || id:ebi-a-GCST90001450	3019
rs530377	9	135337621	C	T	0.2211	0.1627	0.03256	6.12506e-07	CD62L- monocyte Absolute Count || id:ebi-a-GCST90001450	3019
rs143153359	9	76145588	T	C	0.0013	2.05	0.4039	4.11898e-07	CD62L- monocyte Absolute Count || id:ebi-a-GCST90001450	3019
rs4899265	14	69321561	C	A	0.3475	0.139	0.02858	1.213e-06	CD62L- monocyte Absolute Count || id:ebi-a-GCST90001450	3019
rs149543954	20	15302488	T	G	0.0517	0.295	0.06108	1.434e-06	CD62L- monocyte Absolute Count || id:ebi-a-GCST90001450	3019
rs4987360	1	169664867	G	A	0.2763	0.3359	0.02969	4.36918e-29	CD62L- monocyte %monocyte || id:ebi-a-GCST90001451	3042
rs4656708	1	169701466	C	A	0.0457	-0.3294	0.06481	3.93496e-07	CD62L- monocyte %monocyte || id:ebi-a-GCST90001451	3042
rs9859349	3	31661754	A	G	0.1205	0.227	0.04151	4.89204e-08	CD62L- monocyte %monocyte || id:ebi-a-GCST90001451	3042
rs36141595	4	32848987	G	A	0.2516	-0.1512	0.03196	2.34002e-06	CD62L- monocyte %monocyte || id:ebi-a-GCST90001451	3042
rs1816932	4	56771414	A	G	0.2855	0.1467	0.02962	7.76694e-07	CD62L- monocyte %monocyte || id:ebi-a-GCST90001451	3042
rs17624563	5	110456263	G	C	0.0569	-0.2904	0.05766	5.01695e-07	CD62L- monocyte %monocyte || id:ebi-a-GCST90001451	3042
rs11249570	5	177033794	A	G	0.4578	-0.1315	0.02634	6.29506e-07	CD62L- monocyte %monocyte || id:ebi-a-GCST90001451	3042
rs2399610	5	5737796	G	A	0.4988	-0.1315	0.02718	1.37101e-06	CD62L- monocyte %monocyte || id:ebi-a-GCST90001451	3042
rs530377	9	135337621	C	T	0.2206	0.1614	0.03252	7.28199e-07	CD62L- monocyte %monocyte || id:ebi-a-GCST90001451	3042
rs7139370	13	109976273	T	C	0.0676	0.2947	0.0539	4.96295e-08	CD62L- monocyte %monocyte || id:ebi-a-GCST90001451	3042
rs117309559	14	31030304	G	A	0.013	0.5719	0.1203	2.071e-06	CD62L- monocyte %monocyte || id:ebi-a-GCST90001451	3042
rs4899389	14	71667863	A	G	0.132	-0.1913	0.03943	1.281e-06	CD62L- monocyte %monocyte || id:ebi-a-GCST90001451	3042
rs45487297	14	30153119	A	T	0.0135	0.6623	0.1201	3.74498e-08	CD62L- monocyte %monocyte || id:ebi-a-GCST90001451	3042
rs7150584	14	58316355	T	C	0.1624	-0.1787	0.03646	9.95497e-07	CD62L- monocyte %monocyte || id:ebi-a-GCST90001451	3042
rs9807014	17	76108637	T	C	0.1333	-0.2057	0.0397	2.34498e-07	CD62L- monocyte %monocyte || id:ebi-a-GCST90001451	3042
rs2404849	1	224272792	G	T	0.7463	0.1532	0.03003	3.597e-07	CD11c+ CD62L- monocyte Absolute Count || id:ebi-a-GCST90001452	3017
rs55971447	1	161515326	T	C	0.231	-0.1809	0.03084	4.94698e-09	CD11c+ CD62L- monocyte Absolute Count || id:ebi-a-GCST90001452	3017
rs72660177	1	34019363	T	C	0.1018	-0.2006	0.04321	3.60903e-06	CD11c+ CD62L- monocyte Absolute Count || id:ebi-a-GCST90001452	3017
rs72724781	1	89327063	G	A	0.0041	0.9448	0.2002	2.46899e-06	CD11c+ CD62L- monocyte Absolute Count || id:ebi-a-GCST90001452	3017
rs3040901	2	79926958	T	C	0.2224	-0.1559	0.03322	2.80802e-06	CD11c+ CD62L- monocyte Absolute Count || id:ebi-a-GCST90001452	3017
rs75220521	6	81660130	G	T	0.002	-1.36	0.2904	2.947e-06	CD11c+ CD62L- monocyte Absolute Count || id:ebi-a-GCST90001452	3017
rs11772116	7	23594922	C	G	0.0766	0.225	0.04872	4.02402e-06	CD11c+ CD62L- monocyte Absolute Count || id:ebi-a-GCST90001452	3017
rs76524078	12	26355696	A	G	0.0023	1.307	0.2836	4.24004e-06	CD11c+ CD62L- monocyte Absolute Count || id:ebi-a-GCST90001452	3017
rs113800324	12	69766606	T	C	0.05	0.3099	0.05911	1.68298e-07	CD11c+ CD62L- monocyte Absolute Count || id:ebi-a-GCST90001452	3017
rs17474599	13	100593548	T	C	0.0146	-0.5233	0.1093	1.76498e-06	CD11c+ CD62L- monocyte Absolute Count || id:ebi-a-GCST90001452	3017
rs4359381	15	61748527	C	G	0.06	0.2509	0.0547	4.70002e-06	CD11c+ CD62L- monocyte Absolute Count || id:ebi-a-GCST90001452	3017
rs12708874	16	66062093	T	A	0.7957	-0.1526	0.03262	3.00898e-06	CD11c+ CD62L- monocyte Absolute Count || id:ebi-a-GCST90001452	3017
rs9894233	17	45778747	A	T	0.0268	-0.4108	0.08485	1.355e-06	CD11c+ CD62L- monocyte Absolute Count || id:ebi-a-GCST90001452	3017
rs150248455	21	46373171	A	G	0.0673	0.2439	0.05149	2.273e-06	CD11c+ CD62L- monocyte Absolute Count || id:ebi-a-GCST90001452	3017
rs80087840	1	17966505	A	G	0.0105	-0.6187	0.1345	4.36999e-06	CD11c+ CD62L- monocyte %monocyte || id:ebi-a-GCST90001453	3040
rs191730825	1	46613239	G	A	0.0293	0.3846	0.08124	2.30399e-06	CD11c+ CD62L- monocyte %monocyte || id:ebi-a-GCST90001453	3040
rs10924239	1	245721841	A	G	0.0993	0.207	0.04455	3.51601e-06	CD11c+ CD62L- monocyte %monocyte || id:ebi-a-GCST90001453	3040
rs114693598	1	161500712	T	G	0.1418	-0.195	0.03862	4.68296e-07	CD11c+ CD62L- monocyte %monocyte || id:ebi-a-GCST90001453	3040
rs74610143	3	172744541	T	C	0.0125	0.5956	0.1263	2.52203e-06	CD11c+ CD62L- monocyte %monocyte || id:ebi-a-GCST90001453	3040
rs138567833	4	182783833	A	G	0.0895	-0.2161	0.0466	3.68697e-06	CD11c+ CD62L- monocyte %monocyte || id:ebi-a-GCST90001453	3040
rs73073066	7	23486970	T	C	0.0229	0.4544	0.08893	3.42997e-07	CD11c+ CD62L- monocyte %monocyte || id:ebi-a-GCST90001453	3040
rs1469503	11	112076693	T	A	0.9564	0.2989	0.06464	3.90796e-06	CD11c+ CD62L- monocyte %monocyte || id:ebi-a-GCST90001453	3040
rs57566659	12	42973243	C	G	0.0462	0.3077	0.06328	1.21599e-06	CD11c+ CD62L- monocyte %monocyte || id:ebi-a-GCST90001453	3040
rs1800973	12	69744014	A	C	0.0831	0.25	0.04806	2.10999e-07	CD11c+ CD62L- monocyte %monocyte || id:ebi-a-GCST90001453	3040
rs11610005	12	27966210	G	C	0.4359	-0.1298	0.02728	2.053e-06	CD11c+ CD62L- monocyte %monocyte || id:ebi-a-GCST90001453	3040
rs62002392	15	37200279	G	A	0.1118	0.1991	0.04263	3.12097e-06	CD11c+ CD62L- monocyte %monocyte || id:ebi-a-GCST90001453	3040
rs4468691	17	45064678	G	A	0.7286	0.1484	0.03016	9.12998e-07	CD11c+ CD62L- monocyte %monocyte || id:ebi-a-GCST90001453	3040
rs28680389	11	134566275	A	G	0.0747	0.2396	0.04966	1.47299e-06	CD62L- HLA DR++ monocyte Absolute Count || id:ebi-a-GCST90001454	3018
rs938447	12	108746427	C	T	0.6473	0.1364	0.02743	6.93905e-07	CD62L- HLA DR++ monocyte Absolute Count || id:ebi-a-GCST90001454	3018
rs148420500	13	76034172	A	G	0.0209	-0.4212	0.08981	2.86398e-06	CD62L- HLA DR++ monocyte Absolute Count || id:ebi-a-GCST90001454	3018
rs4899265	14	69321561	C	A	0.3474	0.1267	0.02759	4.52699e-06	CD62L- HLA DR++ monocyte Absolute Count || id:ebi-a-GCST90001454	3018
rs139554006	14	53831558	A	G	0.0255	0.3934	0.08287	2.16501e-06	CD62L- HLA DR++ monocyte Absolute Count || id:ebi-a-GCST90001454	3018
rs117545845	22	25622885	T	C	0.1209	0.1995	0.03962	5.04696e-07	CD62L- HLA DR++ monocyte Absolute Count || id:ebi-a-GCST90001454	3018
rs4668750	2	12351867	A	G	0.0524	0.2764	0.05873	2.63299e-06	CD62L- HLA DR++ monocyte %monocyte || id:ebi-a-GCST90001455	3041
rs2955643	3	9386094	A	G	0.4513	0.1248	0.02633	2.23501e-06	CD62L- HLA DR++ monocyte %monocyte || id:ebi-a-GCST90001455	3041
rs12485444	3	188135783	A	T	0.4742	0.1287	0.02682	1.67302e-06	CD62L- HLA DR++ monocyte %monocyte || id:ebi-a-GCST90001455	3041
rs151240896	3	9228763	G	A	0.0702	-0.2473	0.0512	1.42699e-06	CD62L- HLA DR++ monocyte %monocyte || id:ebi-a-GCST90001455	3041
rs189575603	4	83340880	C	T	0.0059	-0.8168	0.1726	2.31499e-06	CD62L- HLA DR++ monocyte %monocyte || id:ebi-a-GCST90001455	3041
rs1969797	9	85828008	A	T	0.0064	0.807	0.1756	4.49097e-06	CD62L- HLA DR++ monocyte %monocyte || id:ebi-a-GCST90001455	3041
rs35079623	14	31868358	C	T	0.0344	0.3488	0.07433	2.80899e-06	CD62L- HLA DR++ monocyte %monocyte || id:ebi-a-GCST90001455	3041
rs765044	19	2560423	G	T	0.2292	0.1523	0.03151	1.40101e-06	CD62L- HLA DR++ monocyte %monocyte || id:ebi-a-GCST90001455	3041
rs5761319	22	26322953	T	A	0.479	0.1333	0.02676	6.65503e-07	CD62L- HLA DR++ monocyte %monocyte || id:ebi-a-GCST90001455	3041
rs561934182	1	103631826	G	C	0.0035	1.163	0.2505	3.61302e-06	CD11c+ HLA DR++ monocyte Absolute Count || id:ebi-a-GCST90001456	3019
rs2404849	1	224272792	G	T	0.7464	0.1466	0.03065	1.79602e-06	CD11c+ HLA DR++ monocyte Absolute Count || id:ebi-a-GCST90001456	3019
rs6808893	3	188133439	T	C	0.5711	-0.1285	0.02714	2.31201e-06	CD11c+ HLA DR++ monocyte Absolute Count || id:ebi-a-GCST90001456	3019
rs548306594	3	87446622	C	T	0.0187	-0.502	0.1059	2.231e-06	CD11c+ HLA DR++ monocyte Absolute Count || id:ebi-a-GCST90001456	3019
rs74610143	3	172744541	T	C	0.0124	0.5811	0.1256	3.83902e-06	CD11c+ HLA DR++ monocyte Absolute Count || id:ebi-a-GCST90001456	3019
rs55651060	6	67292748	T	G	0.0157	-0.5072	0.1058	1.71498e-06	CD11c+ HLA DR++ monocyte Absolute Count || id:ebi-a-GCST90001456	3019
rs2295270	6	47216562	A	G	0.19	0.1631	0.03419	1.91898e-06	CD11c+ HLA DR++ monocyte Absolute Count || id:ebi-a-GCST90001456	3019
rs151194174	7	20995778	A	G	0.0305	-0.3754	0.07868	1.91898e-06	CD11c+ HLA DR++ monocyte Absolute Count || id:ebi-a-GCST90001456	3019
rs2587473	10	72515785	T	C	0.2433	-0.1584	0.03131	4.46601e-07	CD11c+ HLA DR++ monocyte Absolute Count || id:ebi-a-GCST90001456	3019
rs12277397	11	134569102	T	G	0.1179	0.1863	0.04033	4e-06	CD11c+ HLA DR++ monocyte Absolute Count || id:ebi-a-GCST90001456	3019
rs117545845	22	25622885	T	C	0.1211	0.189	0.04018	2.678e-06	CD11c+ HLA DR++ monocyte Absolute Count || id:ebi-a-GCST90001456	3019
rs77361483	1	56892198	T	C	0.0661	0.2544	0.05533	4.45502e-06	CD11c+ HLA DR++ monocyte %monocyte || id:ebi-a-GCST90001457	3042
rs191730825	1	46613239	G	A	0.0293	0.3732	0.08142	4.74799e-06	CD11c+ HLA DR++ monocyte %monocyte || id:ebi-a-GCST90001457	3042
rs6808893	3	188133439	T	C	0.5717	-0.1582	0.02739	8.47208e-09	CD11c+ HLA DR++ monocyte %monocyte || id:ebi-a-GCST90001457	3042
rs74610143	3	172744541	T	C	0.0125	0.6697	0.1264	1.26101e-07	CD11c+ HLA DR++ monocyte %monocyte || id:ebi-a-GCST90001457	3042
rs35237330	4	182768743	A	G	0.0971	-0.2309	0.04538	3.82402e-07	CD11c+ HLA DR++ monocyte %monocyte || id:ebi-a-GCST90001457	3042
rs78175301	7	23629053	G	A	0.0251	0.4043	0.0873	3.78504e-06	CD11c+ HLA DR++ monocyte %monocyte || id:ebi-a-GCST90001457	3042
rs11785252	8	117400280	A	C	0.7429	-0.1459	0.03084	2.32097e-06	CD11c+ HLA DR++ monocyte %monocyte || id:ebi-a-GCST90001457	3042
rs1469503	11	112076693	T	A	0.9564	0.304	0.06476	2.80498e-06	CD11c+ HLA DR++ monocyte %monocyte || id:ebi-a-GCST90001457	3042
rs7101558	11	115387449	G	A	0.044	-0.3015	0.06462	3.21299e-06	CD11c+ HLA DR++ monocyte %monocyte || id:ebi-a-GCST90001457	3042
rs76968110	14	31160823	A	G	0.0189	-0.447	0.0967	3.95303e-06	CD11c+ HLA DR++ monocyte %monocyte || id:ebi-a-GCST90001457	3042
rs9897015	17	45202758	A	G	0.3922	-0.1267	0.02729	3.58798e-06	CD11c+ HLA DR++ monocyte %monocyte || id:ebi-a-GCST90001457	3042
rs76376209	17	35215045	T	C	0.1418	-0.1798	0.03753	1.749e-06	CD11c+ HLA DR++ monocyte %monocyte || id:ebi-a-GCST90001457	3042
rs141320646	1	73622958	A	G	0.005	0.8749	0.1843	2.14501e-06	Myeloid Dendritic Cell Absolute Count || id:ebi-a-GCST90001458	3387
rs115805162	1	161410253	T	C	0.2083	-0.2265	0.03229	2.75296e-12	Myeloid Dendritic Cell Absolute Count || id:ebi-a-GCST90001458	3387
rs71632979	1	161526397	G	A	0.2449	0.6546	0.02797	2.29087e-112	Myeloid Dendritic Cell Absolute Count || id:ebi-a-GCST90001458	3387
rs147678401	1	161035780	A	G	0.0437	0.319	0.06262	3.69199e-07	Myeloid Dendritic Cell Absolute Count || id:ebi-a-GCST90001458	3387
rs569911	1	160798209	C	T	0.4349	0.1529	0.02614	5.432e-09	Myeloid Dendritic Cell Absolute Count || id:ebi-a-GCST90001458	3387
rs142472859	2	40026310	C	T	0.0061	0.7935	0.1634	1.25401e-06	Myeloid Dendritic Cell Absolute Count || id:ebi-a-GCST90001458	3387
rs17017403	2	112435483	C	T	0.0977	-0.2007	0.04301	3.18002e-06	Myeloid Dendritic Cell Absolute Count || id:ebi-a-GCST90001458	3387
rs72794768	2	40472950	A	C	0.012	0.5531	0.1168	2.27002e-06	Myeloid Dendritic Cell Absolute Count || id:ebi-a-GCST90001458	3387
rs62504404	8	38806068	A	G	0.4846	0.1205	0.0252	1.81301e-06	Myeloid Dendritic Cell Absolute Count || id:ebi-a-GCST90001458	3387
rs16938204	8	73348626	T	C	0.2938	0.1297	0.02755	2.60898e-06	Myeloid Dendritic Cell Absolute Count || id:ebi-a-GCST90001458	3387
rs6048352	20	22780354	G	A	0.6811	-0.1264	0.02708	3.16701e-06	Myeloid Dendritic Cell Absolute Count || id:ebi-a-GCST90001458	3387
rs147431504	20	2470273	G	C	0.0038	0.9423	0.2032	3.642e-06	Myeloid Dendritic Cell Absolute Count || id:ebi-a-GCST90001458	3387
rs143140559	1	160972255	T	C	0.0094	0.6438	0.1286	5.78496e-07	Myeloid Dendritic Cell %Dendritic Cell || id:ebi-a-GCST90001459	3410
rs71639910	1	161937774	A	G	0.0688	0.2526	0.05138	9.21998e-07	Myeloid Dendritic Cell %Dendritic Cell || id:ebi-a-GCST90001459	3410
rs71632979	1	161526397	G	A	0.2447	0.6258	0.0287	8.46058e-99	Myeloid Dendritic Cell %Dendritic Cell || id:ebi-a-GCST90001459	3410
rs74341264	1	161561151	A	G	0.1218	-0.2585	0.0396	7.62255e-11	Myeloid Dendritic Cell %Dendritic Cell || id:ebi-a-GCST90001459	3410
rs66730637	2	65193712	T	C	0.0839	-0.2154	0.04634	3.478e-06	Myeloid Dendritic Cell %Dendritic Cell || id:ebi-a-GCST90001459	3410
rs7577824	2	111876763	A	G	0.4757	-0.1227	0.02584	2.14699e-06	Myeloid Dendritic Cell %Dendritic Cell || id:ebi-a-GCST90001459	3410
rs11715127	3	384169	C	G	0.1276	-0.1682	0.03678	4.99505e-06	Myeloid Dendritic Cell %Dendritic Cell || id:ebi-a-GCST90001459	3410
rs62272723	3	151963160	T	G	0.0501	0.2972	0.05987	7.26708e-07	Myeloid Dendritic Cell %Dendritic Cell || id:ebi-a-GCST90001459	3410
rs114586806	6	36323614	T	C	0.0292	0.3577	0.07639	2.93299e-06	Myeloid Dendritic Cell %Dendritic Cell || id:ebi-a-GCST90001459	3410
rs78726632	7	14195723	C	G	0.0097	-0.6159	0.1305	2.44399e-06	Myeloid Dendritic Cell %Dendritic Cell || id:ebi-a-GCST90001459	3410
rs876036	7	50307710	C	T	0.2645	0.1584	0.02961	9.42193e-08	Myeloid Dendritic Cell %Dendritic Cell || id:ebi-a-GCST90001459	3410
rs4921823	8	17810983	T	C	0.0362	-0.3324	0.07035	2.39398e-06	Myeloid Dendritic Cell %Dendritic Cell || id:ebi-a-GCST90001459	3410
rs34547718	8	130647985	G	T	0.2875	-0.1378	0.02808	9.67297e-07	Myeloid Dendritic Cell %Dendritic Cell || id:ebi-a-GCST90001459	3410
rs145330472	9	31374800	A	G	0.0265	-0.3648	0.07932	4.39805e-06	Myeloid Dendritic Cell %Dendritic Cell || id:ebi-a-GCST90001459	3410
rs1330145	9	110467582	G	T	0.5802	0.1193	0.02592	4.35101e-06	Myeloid Dendritic Cell %Dendritic Cell || id:ebi-a-GCST90001459	3410
rs4752481	10	122700529	T	G	0.4535	0.1266	0.02587	1.034e-06	Myeloid Dendritic Cell %Dendritic Cell || id:ebi-a-GCST90001459	3410
rs6079813	20	15407093	A	G	0.0136	-0.5066	0.1102	4.43803e-06	Myeloid Dendritic Cell %Dendritic Cell || id:ebi-a-GCST90001459	3410
rs12628370	22	27665142	T	C	0.1474	-0.1675	0.03597	3.34996e-06	Myeloid Dendritic Cell %Dendritic Cell || id:ebi-a-GCST90001459	3410
rs6708784	2	111927379	G	A	0.4784	0.1169	0.02406	1.243e-06	Plasmacytoid Dendritic Cell Absolute Count || id:ebi-a-GCST90001460	3374
rs12616455	2	85696551	A	G	0.7121	0.1321	0.02633	5.57301e-07	Plasmacytoid Dendritic Cell Absolute Count || id:ebi-a-GCST90001460	3374
rs115638174	2	178694935	T	C	0.0052	-0.7983	0.166	1.59302e-06	Plasmacytoid Dendritic Cell Absolute Count || id:ebi-a-GCST90001460	3374
rs2164210	2	136580287	C	T	0.3244	0.1937	0.02628	2.11787e-13	Plasmacytoid Dendritic Cell Absolute Count || id:ebi-a-GCST90001460	3374
rs77908862	3	104696995	C	T	0.071	0.2251	0.04706	1.79399e-06	Plasmacytoid Dendritic Cell Absolute Count || id:ebi-a-GCST90001460	3374
rs2545798	5	176855627	A	T	0.4813	0.1163	0.02379	1.05201e-06	Plasmacytoid Dendritic Cell Absolute Count || id:ebi-a-GCST90001460	3374
rs62354582	5	36514924	T	C	0.0133	0.5481	0.1034	1.245e-07	Plasmacytoid Dendritic Cell Absolute Count || id:ebi-a-GCST90001460	3374
rs144152085	6	67895544	G	C	0.0009	-1.824	0.3956	4.16601e-06	Plasmacytoid Dendritic Cell Absolute Count || id:ebi-a-GCST90001460	3374
rs186765793	7	11535712	T	C	0.0325	-0.3111	0.06766	4.41804e-06	Plasmacytoid Dendritic Cell Absolute Count || id:ebi-a-GCST90001460	3374
rs876039	7	50308811	C	G	0.2619	-0.1971	0.02752	9.51481e-13	Plasmacytoid Dendritic Cell Absolute Count || id:ebi-a-GCST90001460	3374
rs117039412	8	34472241	A	T	0.0007	2.012	0.4152	1.31701e-06	Plasmacytoid Dendritic Cell Absolute Count || id:ebi-a-GCST90001460	3374
rs11776881	8	131805603	C	A	0.4092	0.1139	0.02439	3.14101e-06	Plasmacytoid Dendritic Cell Absolute Count || id:ebi-a-GCST90001460	3374
rs2862050	10	99691593	T	C	0.818	-0.1453	0.03097	2.81598e-06	Plasmacytoid Dendritic Cell Absolute Count || id:ebi-a-GCST90001460	3374
rs55901425	11	80180769	C	T	0.0028	1.044	0.2255	3.81101e-06	Plasmacytoid Dendritic Cell Absolute Count || id:ebi-a-GCST90001460	3374
rs17582557	13	101828654	C	T	0.0169	0.4301	0.09125	2.54302e-06	Plasmacytoid Dendritic Cell Absolute Count || id:ebi-a-GCST90001460	3374
rs217667	14	62358847	T	C	0.1457	0.1614	0.03341	1.424e-06	Plasmacytoid Dendritic Cell Absolute Count || id:ebi-a-GCST90001460	3374
rs16944211	17	10991039	T	C	0.0027	-1.205	0.2342	2.80899e-07	Plasmacytoid Dendritic Cell Absolute Count || id:ebi-a-GCST90001460	3374
rs10853636	18	51412543	G	A	0.4413	0.1138	0.02422	2.72703e-06	Plasmacytoid Dendritic Cell Absolute Count || id:ebi-a-GCST90001460	3374
rs191217950	1	160940671	A	G	0.0096	0.6722	0.127	1.276e-07	Dendritic Cell Absolute Count || id:ebi-a-GCST90001461	3374
rs911228	1	160145298	A	G	0.5697	0.1199	0.02567	3.08901e-06	Dendritic Cell Absolute Count || id:ebi-a-GCST90001461	3374
rs55971447	1	161515326	T	C	0.2358	0.5889	0.02846	1.19812e-89	Dendritic Cell Absolute Count || id:ebi-a-GCST90001461	3374
rs75072970	1	161058351	C	T	0.0532	0.3483	0.05681	9.7389e-10	Dendritic Cell Absolute Count || id:ebi-a-GCST90001461	3374
rs17017403	2	112435483	C	T	0.098	-0.195	0.04252	4.68296e-06	Dendritic Cell Absolute Count || id:ebi-a-GCST90001461	3374
rs7355664	2	47496463	C	G	0.4502	0.1158	0.0251	4.08498e-06	Dendritic Cell Absolute Count || id:ebi-a-GCST90001461	3374
rs115751481	3	41531792	A	T	0.0258	-0.3782	0.08174	3.843e-06	Dendritic Cell Absolute Count || id:ebi-a-GCST90001461	3374
rs11748731	5	30878060	T	C	0.0362	0.3124	0.06744	3.75396e-06	Dendritic Cell Absolute Count || id:ebi-a-GCST90001461	3374
rs79275634	5	112543958	A	G	0.0107	0.5945	0.1248	1.98299e-06	Dendritic Cell Absolute Count || id:ebi-a-GCST90001461	3374
rs2490034	6	3870889	A	G	0.7432	0.1328	0.02893	4.60596e-06	Dendritic Cell Absolute Count || id:ebi-a-GCST90001461	3374
rs28854187	8	73320315	A	G	0.2964	0.1282	0.02716	2.452e-06	Dendritic Cell Absolute Count || id:ebi-a-GCST90001461	3374
rs62504404	8	38806068	A	G	0.4843	0.125	0.02491	5.47797e-07	Dendritic Cell Absolute Count || id:ebi-a-GCST90001461	3374
rs138192280	9	88411604	T	C	0.1679	0.1545	0.0336	4.39805e-06	Dendritic Cell Absolute Count || id:ebi-a-GCST90001461	3374
rs142917473	12	133840072	C	G	0.3072	-0.1534	0.03214	1.894e-06	Dendritic Cell Absolute Count || id:ebi-a-GCST90001461	3374
rs115102594	17	35251042	G	C	0.0603	-0.252	0.05419	3.434e-06	Dendritic Cell Absolute Count || id:ebi-a-GCST90001461	3374
rs147431504	20	2470273	G	C	0.0039	0.9392	0.2001	2.78298e-06	Dendritic Cell Absolute Count || id:ebi-a-GCST90001461	3374
rs74341264	1	161561151	A	G	0.1219	-0.3652	0.03894	1.18195e-20	CD62L- Dendritic Cell Absolute Count || id:ebi-a-GCST90001462	3387
rs143140559	1	160972255	T	C	0.0094	0.7418	0.1284	8.28209e-09	CD62L- Dendritic Cell Absolute Count || id:ebi-a-GCST90001462	3387
rs71632979	1	161526397	G	A	0.2449	0.7524	0.02735	1.40281e-150	CD62L- Dendritic Cell Absolute Count || id:ebi-a-GCST90001462	3387
rs147678401	1	161035780	A	G	0.0437	0.3283	0.06281	1.82898e-07	CD62L- Dendritic Cell Absolute Count || id:ebi-a-GCST90001462	3387
rs71639910	1	161937774	A	G	0.0686	0.3586	0.05081	2.04692e-12	CD62L- Dendritic Cell Absolute Count || id:ebi-a-GCST90001462	3387
rs17438107	1	162920561	T	A	0.0921	0.2057	0.04421	3.37699e-06	CD62L- Dendritic Cell Absolute Count || id:ebi-a-GCST90001462	3387
rs75055130	2	155187137	C	G	0.0024	-1.139	0.2448	3.39203e-06	CD62L- Dendritic Cell Absolute Count || id:ebi-a-GCST90001462	3387
rs35740507	4	90807488	C	T	0.0001	-4.152	0.8762	2.23599e-06	CD62L- Dendritic Cell Absolute Count || id:ebi-a-GCST90001462	3387
rs116910026	11	19877912	T	C	0.0512	0.2767	0.05667	1.09401e-06	CD62L- Dendritic Cell Absolute Count || id:ebi-a-GCST90001462	3387
rs149812305	11	5480718	C	T	0.0272	-0.36	0.0755	1.94299e-06	CD62L- Dendritic Cell Absolute Count || id:ebi-a-GCST90001462	3387
rs73231298	12	127036033	A	G	0.287	0.1337	0.02799	1.86599e-06	CD62L- Dendritic Cell Absolute Count || id:ebi-a-GCST90001462	3387
rs35519924	15	81119490	A	G	0.3276	0.128	0.02738	3.039e-06	CD62L- Dendritic Cell Absolute Count || id:ebi-a-GCST90001462	3387
rs1515318	1	105108278	A	G	0.435	-0.1257	0.02658	2.34401e-06	CD62L- Dendritic Cell %Dendritic Cell || id:ebi-a-GCST90001463	3410
rs143140559	1	160972255	T	C	0.0094	0.6557	0.1304	5.14802e-07	CD62L- Dendritic Cell %Dendritic Cell || id:ebi-a-GCST90001463	3410
rs74341264	1	161561151	A	G	0.1218	-0.3829	0.03987	1.43285e-21	CD62L- Dendritic Cell %Dendritic Cell || id:ebi-a-GCST90001463	3410
rs143032729	1	160353789	G	A	0.0326	0.4142	0.07525	3.971e-08	CD62L- Dendritic Cell %Dendritic Cell || id:ebi-a-GCST90001463	3410
rs6537835	1	115108914	A	G	0.8488	-0.2072	0.03711	2.54302e-08	CD62L- Dendritic Cell %Dendritic Cell || id:ebi-a-GCST90001463	3410
rs341029	1	77072414	A	G	0.7375	-0.137	0.02939	3.25499e-06	CD62L- Dendritic Cell %Dendritic Cell || id:ebi-a-GCST90001463	3410
rs56199187	1	161520931	T	C	0.2441	0.7548	0.02809	2.11349e-144	CD62L- Dendritic Cell %Dendritic Cell || id:ebi-a-GCST90001463	3410
rs62300075	4	43118540	C	A	0.3707	0.1381	0.027	3.32499e-07	CD62L- Dendritic Cell %Dendritic Cell || id:ebi-a-GCST90001463	3410
rs116473196	5	179543345	T	C	0.0031	-0.9935	0.2113	2.68398e-06	CD62L- Dendritic Cell %Dendritic Cell || id:ebi-a-GCST90001463	3410
rs75220521	6	81660130	G	T	0.0023	1.355	0.2917	3.498e-06	CD62L- Dendritic Cell %Dendritic Cell || id:ebi-a-GCST90001463	3410
rs702185	9	1621830	G	A	0.0783	0.2232	0.04854	4.41205e-06	CD62L- Dendritic Cell %Dendritic Cell || id:ebi-a-GCST90001463	3410
rs149812305	11	5480718	C	T	0.0271	-0.3592	0.07663	2.87799e-06	CD62L- Dendritic Cell %Dendritic Cell || id:ebi-a-GCST90001463	3410
rs7163051	15	68361528	A	G	0.3702	0.1266	0.02752	4.34901e-06	CD62L- Dendritic Cell %Dendritic Cell || id:ebi-a-GCST90001463	3410
rs148188224	16	65149970	G	C	0.0019	-1.426	0.3084	3.94703e-06	CD62L- Dendritic Cell %Dendritic Cell || id:ebi-a-GCST90001463	3410
rs2024391	16	11907102	T	C	0.1736	0.1625	0.0348	3.13098e-06	CD62L- Dendritic Cell %Dendritic Cell || id:ebi-a-GCST90001463	3410
rs72711599	1	162752670	A	G	0.0884	0.2153	0.04595	2.91602e-06	CD86+ myeloid Dendritic Cell Absolute Count || id:ebi-a-GCST90001464	3387
rs12134798	1	120115384	T	C	0.1673	0.1639	0.03471	2.44602e-06	CD86+ myeloid Dendritic Cell Absolute Count || id:ebi-a-GCST90001464	3387
rs147678401	1	161035780	A	G	0.0437	0.3116	0.06427	1.30101e-06	CD86+ myeloid Dendritic Cell Absolute Count || id:ebi-a-GCST90001464	3387
rs139939515	1	163958750	T	C	0.0124	-0.5561	0.1174	2.28202e-06	CD86+ myeloid Dendritic Cell Absolute Count || id:ebi-a-GCST90001464	3387
rs71639910	1	161937774	A	G	0.0686	0.3667	0.05205	2.25476e-12	CD86+ myeloid Dendritic Cell Absolute Count || id:ebi-a-GCST90001464	3387
rs6656063	1	157964856	T	C	0.2499	0.1405	0.02956	2.093e-06	CD86+ myeloid Dendritic Cell Absolute Count || id:ebi-a-GCST90001464	3387
rs71632979	1	161526397	G	A	0.2449	0.8088	0.02785	9.7051e-166	CD86+ myeloid Dendritic Cell Absolute Count || id:ebi-a-GCST90001464	3387
rs113995133	1	163485197	A	G	0.0103	-0.6058	0.1285	2.51102e-06	CD86+ myeloid Dendritic Cell Absolute Count || id:ebi-a-GCST90001464	3387
rs74341264	1	161561151	A	G	0.1219	-0.355	0.04006	1.25401e-18	CD86+ myeloid Dendritic Cell Absolute Count || id:ebi-a-GCST90001464	3387
rs143140559	1	160972255	T	C	0.0094	0.7391	0.1304	1.55299e-08	CD86+ myeloid Dendritic Cell Absolute Count || id:ebi-a-GCST90001464	3387
rs115849513	3	1827937	T	A	0.0245	-0.3927	0.08325	2.495e-06	CD86+ myeloid Dendritic Cell Absolute Count || id:ebi-a-GCST90001464	3387
rs112186537	6	73397623	T	C	0.0075	-0.6969	0.1444	1.45499e-06	CD86+ myeloid Dendritic Cell Absolute Count || id:ebi-a-GCST90001464	3387
rs185312213	14	51937110	G	T	0.0066	-0.7215	0.1571	4.52501e-06	CD86+ myeloid Dendritic Cell Absolute Count || id:ebi-a-GCST90001464	3387
rs140205436	15	25969797	T	C	0.0006	-2.409	0.5106	2.476e-06	CD86+ myeloid Dendritic Cell Absolute Count || id:ebi-a-GCST90001464	3387
rs79497887	16	57725145	G	C	0.0865	-0.2163	0.04565	2.25798e-06	CD86+ myeloid Dendritic Cell Absolute Count || id:ebi-a-GCST90001464	3387
rs143140559	1	160972255	T	C	0.0094	0.6732	0.1308	2.80098e-07	CD86+ myeloid Dendritic Cell %Dendritic Cell || id:ebi-a-GCST90001465	3410
rs6656063	1	157964856	T	C	0.2501	0.1357	0.02958	4.635e-06	CD86+ myeloid Dendritic Cell %Dendritic Cell || id:ebi-a-GCST90001465	3410
rs71639910	1	161937774	A	G	0.0688	0.3612	0.0521	4.9023e-12	CD86+ myeloid Dendritic Cell %Dendritic Cell || id:ebi-a-GCST90001465	3410
rs113995133	1	163485197	A	G	0.0103	-0.6667	0.1287	2.339e-07	CD86+ myeloid Dendritic Cell %Dendritic Cell || id:ebi-a-GCST90001465	3410
rs74341264	1	161561151	A	G	0.1218	-0.3508	0.0401	3.33887e-18	CD86+ myeloid Dendritic Cell %Dendritic Cell || id:ebi-a-GCST90001465	3410
rs139939515	1	163958750	T	C	0.0123	-0.6222	0.1176	1.30299e-07	CD86+ myeloid Dendritic Cell %Dendritic Cell || id:ebi-a-GCST90001465	3410
rs71632979	1	161526397	G	A	0.2447	0.8089	0.02792	4.21697e-165	CD86+ myeloid Dendritic Cell %Dendritic Cell || id:ebi-a-GCST90001465	3410
rs950485	1	82817239	C	A	0.4919	0.1227	0.02577	2.01002e-06	CD86+ myeloid Dendritic Cell %Dendritic Cell || id:ebi-a-GCST90001465	3410
rs114566711	2	191451636	T	A	0.0009	-1.864	0.391	1.948e-06	CD86+ myeloid Dendritic Cell %Dendritic Cell || id:ebi-a-GCST90001465	3410
rs1996740	4	78748977	G	A	0.4776	-0.1204	0.02608	4.06602e-06	CD86+ myeloid Dendritic Cell %Dendritic Cell || id:ebi-a-GCST90001465	3410
rs143512471	5	63081773	A	G	0.026	-0.3741	0.08154	4.62999e-06	CD86+ myeloid Dendritic Cell %Dendritic Cell || id:ebi-a-GCST90001465	3410
rs78169719	7	157588588	C	A	0.0177	-0.443	0.09659	4.67703e-06	CD86+ myeloid Dendritic Cell %Dendritic Cell || id:ebi-a-GCST90001465	3410
rs76522264	8	113032809	C	G	0.0004	-2.6	0.5564	3.079e-06	CD86+ myeloid Dendritic Cell %Dendritic Cell || id:ebi-a-GCST90001465	3410
rs117690664	8	107693714	A	C	0.0007	-2.515	0.5157	1.123e-06	CD86+ myeloid Dendritic Cell %Dendritic Cell || id:ebi-a-GCST90001465	3410
rs75358870	14	30170464	A	C	0.0128	0.5691	0.1186	1.66901e-06	CD86+ myeloid Dendritic Cell %Dendritic Cell || id:ebi-a-GCST90001465	3410
rs72745440	15	67606602	A	C	0.0141	-0.5139	0.11	3.12702e-06	CD86+ myeloid Dendritic Cell %Dendritic Cell || id:ebi-a-GCST90001465	3410
rs56164117	1	45173351	C	T	0.3543	-0.1223	0.02608	2.86603e-06	CD86+ plasmacytoid Dendritic Cell Absolute Count || id:ebi-a-GCST90001466	3374
rs1991164	2	1732855	C	T	0.5529	-0.117	0.02506	3.13798e-06	CD86+ plasmacytoid Dendritic Cell Absolute Count || id:ebi-a-GCST90001466	3374
rs13088702	3	121714019	C	T	0.0252	0.3946	0.07957	7.45401e-07	CD86+ plasmacytoid Dendritic Cell Absolute Count || id:ebi-a-GCST90001466	3374
rs2725015	8	4465101	G	A	0.266	-0.1473	0.02834	2.16601e-07	CD86+ plasmacytoid Dendritic Cell Absolute Count || id:ebi-a-GCST90001466	3374
rs79116372	8	36308379	T	A	0.0375	-0.3011	0.06551	4.44396e-06	CD86+ plasmacytoid Dendritic Cell Absolute Count || id:ebi-a-GCST90001466	3374
rs139557155	9	77583476	G	A	0.0578	0.2575	0.05462	2.52203e-06	CD86+ plasmacytoid Dendritic Cell Absolute Count || id:ebi-a-GCST90001466	3374
rs61852527	10	90380589	G	A	0.0649	-0.2618	0.0509	2.84197e-07	CD86+ plasmacytoid Dendritic Cell Absolute Count || id:ebi-a-GCST90001466	3374
rs9513487	13	99428046	G	T	0.3251	0.1234	0.0269	4.67498e-06	CD86+ plasmacytoid Dendritic Cell Absolute Count || id:ebi-a-GCST90001466	3374
rs142245023	14	69634234	A	G	0.0067	0.7025	0.1505	3.17198e-06	CD86+ plasmacytoid Dendritic Cell Absolute Count || id:ebi-a-GCST90001466	3374
rs11852100	14	36478046	C	A	0.0587	0.2639	0.0548	1.527e-06	CD86+ plasmacytoid Dendritic Cell Absolute Count || id:ebi-a-GCST90001466	3374
rs75070627	15	96560797	C	T	0.0037	0.9624	0.1978	1.18801e-06	CD86+ plasmacytoid Dendritic Cell Absolute Count || id:ebi-a-GCST90001466	3374
rs114468547	16	78055434	G	A	0.0491	-0.2713	0.05921	4.77101e-06	CD86+ plasmacytoid Dendritic Cell Absolute Count || id:ebi-a-GCST90001466	3374
rs118148569	16	13019834	T	C	0.0505	0.2729	0.05772	2.362e-06	CD86+ plasmacytoid Dendritic Cell Absolute Count || id:ebi-a-GCST90001466	3374
rs112496823	17	33829583	C	A	0.1768	0.1603	0.03305	1.286e-06	CD86+ plasmacytoid Dendritic Cell Absolute Count || id:ebi-a-GCST90001466	3374
rs3845548	1	161507448	T	C	0.2345	-0.2739	0.02938	1.98381e-20	CD86+ plasmacytoid Dendritic Cell %Dendritic Cell || id:ebi-a-GCST90001467	3410
rs11811863	1	247577856	T	C	0.2186	-0.1537	0.03086	6.62598e-07	CD86+ plasmacytoid Dendritic Cell %Dendritic Cell || id:ebi-a-GCST90001467	3410
rs10170363	2	15272805	T	C	0.2944	0.1318	0.02687	9.80189e-07	CD86+ plasmacytoid Dendritic Cell %Dendritic Cell || id:ebi-a-GCST90001467	3410
rs66967216	2	190942111	A	G	0.0265	-0.3759	0.07853	1.76799e-06	CD86+ plasmacytoid Dendritic Cell %Dendritic Cell || id:ebi-a-GCST90001467	3410
rs1915087	3	121838791	C	T	0.2025	0.1569	0.03084	3.84601e-07	CD86+ plasmacytoid Dendritic Cell %Dendritic Cell || id:ebi-a-GCST90001467	3410
rs78379738	5	148318809	G	T	0.0364	0.3227	0.06823	2.34202e-06	CD86+ plasmacytoid Dendritic Cell %Dendritic Cell || id:ebi-a-GCST90001467	3410
rs6930632	6	155772981	T	C	0.1789	-0.1504	0.03249	3.80803e-06	CD86+ plasmacytoid Dendritic Cell %Dendritic Cell || id:ebi-a-GCST90001467	3410
rs6463191	7	43492179	A	G	0.3198	-0.1275	0.02658	1.68702e-06	CD86+ plasmacytoid Dendritic Cell %Dendritic Cell || id:ebi-a-GCST90001467	3410
rs116872766	8	77883134	C	G	0.0045	-0.9025	0.1818	7.20195e-07	CD86+ plasmacytoid Dendritic Cell %Dendritic Cell || id:ebi-a-GCST90001467	3410
rs55966096	8	4474949	C	T	0.3085	-0.1321	0.02729	1.36101e-06	CD86+ plasmacytoid Dendritic Cell %Dendritic Cell || id:ebi-a-GCST90001467	3410
rs140090913	8	18584959	A	G	0.0028	-1.154	0.2432	2.174e-06	CD86+ plasmacytoid Dendritic Cell %Dendritic Cell || id:ebi-a-GCST90001467	3410
rs139557155	9	77583476	G	A	0.0578	0.277	0.05451	3.92799e-07	CD86+ plasmacytoid Dendritic Cell %Dendritic Cell || id:ebi-a-GCST90001467	3410
rs61852527	10	90380589	G	A	0.0648	-0.2768	0.05083	5.53694e-08	CD86+ plasmacytoid Dendritic Cell %Dendritic Cell || id:ebi-a-GCST90001467	3410
rs11231693	11	63862612	A	G	0.0554	-0.2631	0.05451	1.44601e-06	CD86+ plasmacytoid Dendritic Cell %Dendritic Cell || id:ebi-a-GCST90001467	3410
rs12311260	12	18094072	G	C	0.0501	0.2649	0.0576	4.38399e-06	CD86+ plasmacytoid Dendritic Cell %Dendritic Cell || id:ebi-a-GCST90001467	3410
rs9513487	13	99428046	G	T	0.326	0.131	0.0268	1.065e-06	CD86+ plasmacytoid Dendritic Cell %Dendritic Cell || id:ebi-a-GCST90001467	3410
rs75070627	15	96560797	C	T	0.0037	0.9606	0.2005	1.73201e-06	CD86+ plasmacytoid Dendritic Cell %Dendritic Cell || id:ebi-a-GCST90001467	3410
rs112496823	17	33829583	C	A	0.1771	0.1585	0.03308	1.72001e-06	CD86+ plasmacytoid Dendritic Cell %Dendritic Cell || id:ebi-a-GCST90001467	3410
rs71381356	17	49908577	C	T	0.0845	-0.2097	0.04494	3.176e-06	CD86+ plasmacytoid Dendritic Cell %Dendritic Cell || id:ebi-a-GCST90001467	3410
rs9607320	22	22202164	T	C	0.6037	0.1192	0.02572	3.67198e-06	CD86+ plasmacytoid Dendritic Cell %Dendritic Cell || id:ebi-a-GCST90001467	3410
rs74341264	1	161561151	A	G	0.1219	-0.4066	0.03995	5.48656e-24	CD62L- myeloid Dendritic Cell Absolute Count || id:ebi-a-GCST90001468	3387
rs71632979	1	161526397	G	A	0.2449	0.8094	0.02787	9.84011e-166	CD62L- myeloid Dendritic Cell Absolute Count || id:ebi-a-GCST90001468	3387
rs17438107	1	162920561	T	A	0.0921	0.2161	0.04523	1.83502e-06	CD62L- myeloid Dendritic Cell Absolute Count || id:ebi-a-GCST90001468	3387
rs143140559	1	160972255	T	C	0.0094	0.8211	0.1303	3.33903e-10	CD62L- myeloid Dendritic Cell Absolute Count || id:ebi-a-GCST90001468	3387
rs71639910	1	161937774	A	G	0.0686	0.401	0.05202	1.66303e-14	CD62L- myeloid Dendritic Cell Absolute Count || id:ebi-a-GCST90001468	3387
rs147678401	1	161035780	A	G	0.0437	0.3306	0.06429	2.86101e-07	CD62L- myeloid Dendritic Cell Absolute Count || id:ebi-a-GCST90001468	3387
rs73172229	3	179194521	T	C	0.1233	-0.1908	0.03986	1.77101e-06	CD62L- myeloid Dendritic Cell Absolute Count || id:ebi-a-GCST90001468	3387
rs13148506	4	43123482	T	C	0.3691	0.1304	0.02714	1.61901e-06	CD62L- myeloid Dendritic Cell Absolute Count || id:ebi-a-GCST90001468	3387
rs116910026	11	19877912	T	C	0.0512	0.2902	0.05778	5.38704e-07	CD62L- myeloid Dendritic Cell Absolute Count || id:ebi-a-GCST90001468	3387
rs4997747	12	127036550	C	T	0.2917	0.1346	0.02844	2.29198e-06	CD62L- myeloid Dendritic Cell Absolute Count || id:ebi-a-GCST90001468	3387
rs74341264	1	161561151	A	G	0.1218	-0.4263	0.03928	5.29176e-27	CD62L- myeloid Dendritic Cell %Dendritic Cell || id:ebi-a-GCST90001469	3410
rs147678401	1	161035780	A	G	0.0437	0.3059	0.06344	1.48102e-06	CD62L- myeloid Dendritic Cell %Dendritic Cell || id:ebi-a-GCST90001469	3410
rs34558449	1	192566347	C	G	0.0846	0.2273	0.04585	7.51208e-07	CD62L- myeloid Dendritic Cell %Dendritic Cell || id:ebi-a-GCST90001469	3410
rs143140559	1	160972255	T	C	0.0094	0.7929	0.1294	1.00501e-09	CD62L- myeloid Dendritic Cell %Dendritic Cell || id:ebi-a-GCST90001469	3410
rs71632979	1	161526397	G	A	0.2447	0.8232	0.02725	8.531e-178	CD62L- myeloid Dendritic Cell %Dendritic Cell || id:ebi-a-GCST90001469	3410
rs71639910	1	161937774	A	G	0.0688	0.4169	0.05126	5.85868e-16	CD62L- myeloid Dendritic Cell %Dendritic Cell || id:ebi-a-GCST90001469	3410
rs10779896	2	4613050	T	A	0.0632	-0.2427	0.05258	4.04297e-06	CD62L- myeloid Dendritic Cell %Dendritic Cell || id:ebi-a-GCST90001469	3410
rs16864449	3	189220585	G	A	0.0026	-1.124	0.2398	2.83903e-06	CD62L- myeloid Dendritic Cell %Dendritic Cell || id:ebi-a-GCST90001469	3410
rs17637703	3	45440721	G	A	0.2437	0.1393	0.03014	3.94103e-06	CD62L- myeloid Dendritic Cell %Dendritic Cell || id:ebi-a-GCST90001469	3410
rs530300575	4	3387723	G	A	0.0038	-1.019	0.2169	2.733e-06	CD62L- myeloid Dendritic Cell %Dendritic Cell || id:ebi-a-GCST90001469	3410
rs62300075	4	43118540	C	A	0.3707	0.1382	0.02676	2.524e-07	CD62L- myeloid Dendritic Cell %Dendritic Cell || id:ebi-a-GCST90001469	3410
rs75220521	6	81660130	G	T	0.0023	1.34	0.289	3.67502e-06	CD62L- myeloid Dendritic Cell %Dendritic Cell || id:ebi-a-GCST90001469	3410
rs116910026	11	19877912	T	C	0.0512	0.273	0.05712	1.82201e-06	CD62L- myeloid Dendritic Cell %Dendritic Cell || id:ebi-a-GCST90001469	3410
rs72743439	15	67410088	T	C	0.0031	1.099	0.2389	4.39602e-06	CD62L- myeloid Dendritic Cell %Dendritic Cell || id:ebi-a-GCST90001469	3410
rs5767014	22	48474288	C	T	0.7776	-0.1514	0.03046	6.94592e-07	CD62L- myeloid Dendritic Cell %Dendritic Cell || id:ebi-a-GCST90001469	3410
rs4462104	1	36975893	C	T	0.2011	-0.1397	0.03017	3.764e-06	CD62L- plasmacytoid Dendritic Cell Absolute Count || id:ebi-a-GCST90001470	3374
rs17224524	2	182346146	C	T	0.2945	-0.129	0.02753	2.87098e-06	CD62L- plasmacytoid Dendritic Cell Absolute Count || id:ebi-a-GCST90001470	3374
rs116054627	2	51168498	A	G	0.0413	0.3356	0.06158	5.38505e-08	CD62L- plasmacytoid Dendritic Cell Absolute Count || id:ebi-a-GCST90001470	3374
rs191779135	4	82502357	G	A	0.0865	-0.2628	0.04325	1.376e-09	CD62L- plasmacytoid Dendritic Cell Absolute Count || id:ebi-a-GCST90001470	3374
rs6535445	4	84151427	C	T	0.3435	-0.2794	0.02525	5.62471e-28	CD62L- plasmacytoid Dendritic Cell Absolute Count || id:ebi-a-GCST90001470	3374
rs1472757	5	6455872	C	T	0.6057	-0.1252	0.02495	5.45306e-07	CD62L- plasmacytoid Dendritic Cell Absolute Count || id:ebi-a-GCST90001470	3374
rs1391986	5	52071311	T	G	0.0061	0.7317	0.1561	2.87402e-06	CD62L- plasmacytoid Dendritic Cell Absolute Count || id:ebi-a-GCST90001470	3374
rs56374915	7	115086436	A	G	0.1119	-0.1835	0.03892	2.52802e-06	CD62L- plasmacytoid Dendritic Cell Absolute Count || id:ebi-a-GCST90001470	3374
rs118054784	8	130658684	A	G	0.0422	0.2985	0.0621	1.59698e-06	CD62L- plasmacytoid Dendritic Cell Absolute Count || id:ebi-a-GCST90001470	3374
rs116894787	10	12240106	C	G	0.0111	0.5376	0.1152	3.18801e-06	CD62L- plasmacytoid Dendritic Cell Absolute Count || id:ebi-a-GCST90001470	3374
rs7114664	11	22793001	C	T	0.1046	0.1874	0.0397	2.44101e-06	CD62L- plasmacytoid Dendritic Cell Absolute Count || id:ebi-a-GCST90001470	3374
rs61936377	12	63530291	C	T	0.2503	0.1364	0.02822	1.39601e-06	CD62L- plasmacytoid Dendritic Cell Absolute Count || id:ebi-a-GCST90001470	3374
rs16957038	13	100542252	A	G	0.0022	1.17	0.2465	2.15298e-06	CD62L- plasmacytoid Dendritic Cell Absolute Count || id:ebi-a-GCST90001470	3374
rs170697	14	83856849	A	G	0.507	0.1127	0.02415	3.16403e-06	CD62L- plasmacytoid Dendritic Cell Absolute Count || id:ebi-a-GCST90001470	3374
rs11659751	18	55736723	A	T	0.0772	0.209	0.04558	4.70804e-06	CD62L- plasmacytoid Dendritic Cell Absolute Count || id:ebi-a-GCST90001470	3374
rs55971447	1	161515326	T	C	0.2352	-0.3011	0.02899	6.69885e-25	CD62L- plasmacytoid Dendritic Cell %Dendritic Cell || id:ebi-a-GCST90001471	3410
rs116054627	2	51168498	A	G	0.0411	0.2959	0.063	2.73602e-06	CD62L- plasmacytoid Dendritic Cell %Dendritic Cell || id:ebi-a-GCST90001471	3410
rs62297340	4	5407389	A	C	0.1132	0.1816	0.03899	3.30803e-06	CD62L- plasmacytoid Dendritic Cell %Dendritic Cell || id:ebi-a-GCST90001471	3410
rs6535445	4	84151427	C	T	0.344	-0.3029	0.02564	1.34803e-31	CD62L- plasmacytoid Dendritic Cell %Dendritic Cell || id:ebi-a-GCST90001471	3410
rs191779135	4	82502357	G	A	0.0867	-0.2664	0.04411	1.721e-09	CD62L- plasmacytoid Dendritic Cell %Dendritic Cell || id:ebi-a-GCST90001471	3410
rs146839224	10	131367364	A	G	0.0025	1.182	0.2447	1.41899e-06	CD62L- plasmacytoid Dendritic Cell %Dendritic Cell || id:ebi-a-GCST90001471	3410
rs11000032	10	73619601	A	G	0.2843	0.1292	0.02767	3.12802e-06	CD62L- plasmacytoid Dendritic Cell %Dendritic Cell || id:ebi-a-GCST90001471	3410
rs182833362	16	27972325	A	G	0.0009	1.949	0.408	1.86299e-06	CD62L- plasmacytoid Dendritic Cell %Dendritic Cell || id:ebi-a-GCST90001471	3410
rs3827963	20	20371744	G	A	0.3408	0.1206	0.02628	4.61902e-06	CD62L- plasmacytoid Dendritic Cell %Dendritic Cell || id:ebi-a-GCST90001471	3410
rs147678401	1	161035780	A	G	0.0437	0.3417	0.06421	1.09901e-07	CD62L- CD86+ myeloid Dendritic Cell Absolute Count || id:ebi-a-GCST90001472	3387
rs74341264	1	161561151	A	G	0.1219	-0.4509	0.03985	3.71535e-29	CD62L- CD86+ myeloid Dendritic Cell Absolute Count || id:ebi-a-GCST90001472	3387
rs2788088	1	2897093	A	G	0.6884	-0.1286	0.02736	2.711e-06	CD62L- CD86+ myeloid Dendritic Cell Absolute Count || id:ebi-a-GCST90001472	3387
rs71639910	1	161937774	A	G	0.0686	0.425	0.05195	3.95913e-16	CD62L- CD86+ myeloid Dendritic Cell Absolute Count || id:ebi-a-GCST90001472	3387
rs113995133	1	163485197	A	G	0.0103	-0.6066	0.1283	2.381e-06	CD62L- CD86+ myeloid Dendritic Cell Absolute Count || id:ebi-a-GCST90001472	3387
rs71632979	1	161526397	G	A	0.2449	0.9207	0.02691	1e-200	CD62L- CD86+ myeloid Dendritic Cell Absolute Count || id:ebi-a-GCST90001472	3387
rs77107932	1	162042160	C	A	0.0279	-0.4223	0.08238	3.13098e-07	CD62L- CD86+ myeloid Dendritic Cell Absolute Count || id:ebi-a-GCST90001472	3387
rs143140559	1	160972255	T	C	0.0094	0.7645	0.1298	4.219e-09	CD62L- CD86+ myeloid Dendritic Cell Absolute Count || id:ebi-a-GCST90001472	3387
rs162588	3	364098	A	G	0.2046	-0.1544	0.03158	1.06101e-06	CD62L- CD86+ myeloid Dendritic Cell Absolute Count || id:ebi-a-GCST90001472	3387
rs112186537	6	73397623	T	C	0.0075	-0.691	0.1441	1.69099e-06	CD62L- CD86+ myeloid Dendritic Cell Absolute Count || id:ebi-a-GCST90001472	3387
rs117690664	8	107693714	A	C	0.0007	-2.339	0.5107	4.80596e-06	CD62L- CD86+ myeloid Dendritic Cell Absolute Count || id:ebi-a-GCST90001472	3387
rs139956891	10	127556162	G	A	0.0616	0.2686	0.05451	8.74601e-07	CD62L- CD86+ myeloid Dendritic Cell Absolute Count || id:ebi-a-GCST90001472	3387
rs135299	22	48479731	A	G	0.2166	0.1435	0.03123	4.46396e-06	CD62L- CD86+ myeloid Dendritic Cell Absolute Count || id:ebi-a-GCST90001472	3387
rs2788088	1	2897093	A	G	0.6886	-0.1283	0.02719	2.488e-06	CD62L- CD86+ myeloid Dendritic Cell %Dendritic Cell || id:ebi-a-GCST90001473	3410
rs147678401	1	161035780	A	G	0.0437	0.3215	0.06383	4.97496e-07	CD62L- CD86+ myeloid Dendritic Cell %Dendritic Cell || id:ebi-a-GCST90001473	3410
rs71639910	1	161937774	A	G	0.0688	0.4245	0.05172	3.15864e-16	CD62L- CD86+ myeloid Dendritic Cell %Dendritic Cell || id:ebi-a-GCST90001473	3410
rs113995133	1	163485197	A	G	0.0103	-0.6516	0.1277	3.53997e-07	CD62L- CD86+ myeloid Dendritic Cell %Dendritic Cell || id:ebi-a-GCST90001473	3410
rs6537835	1	115108914	A	G	0.8488	-0.1706	0.03712	4.48002e-06	CD62L- CD86+ myeloid Dendritic Cell %Dendritic Cell || id:ebi-a-GCST90001473	3410
rs79078281	1	147922051	G	A	0.017	0.5118	0.1119	4.99597e-06	CD62L- CD86+ myeloid Dendritic Cell %Dendritic Cell || id:ebi-a-GCST90001473	3410
rs74341264	1	161561151	A	G	0.1218	-0.4505	0.03971	2.65277e-29	CD62L- CD86+ myeloid Dendritic Cell %Dendritic Cell || id:ebi-a-GCST90001473	3410
rs71632979	1	161526397	G	A	0.2447	0.929	0.0268	1e-200	CD62L- CD86+ myeloid Dendritic Cell %Dendritic Cell || id:ebi-a-GCST90001473	3410
rs77107932	1	162042160	C	A	0.028	-0.4247	0.08194	2.30802e-07	CD62L- CD86+ myeloid Dendritic Cell %Dendritic Cell || id:ebi-a-GCST90001473	3410
rs143140559	1	160972255	T	C	0.0094	0.71	0.1289	3.879e-08	CD62L- CD86+ myeloid Dendritic Cell %Dendritic Cell || id:ebi-a-GCST90001473	3410
rs117690664	8	107693714	A	C	0.0007	-2.506	0.5056	7.49394e-07	CD62L- CD86+ myeloid Dendritic Cell %Dendritic Cell || id:ebi-a-GCST90001473	3410
rs4761369	12	77743499	T	C	0.1861	0.1553	0.03329	3.19198e-06	CD62L- CD86+ myeloid Dendritic Cell %Dendritic Cell || id:ebi-a-GCST90001473	3410
rs500809	20	3013136	A	G	0.5667	0.1195	0.02597	4.37603e-06	CD62L- CD86+ myeloid Dendritic Cell %Dendritic Cell || id:ebi-a-GCST90001473	3410
rs10910893	1	181160955	T	G	0.0707	-0.2262	0.04889	3.85798e-06	Plasmacytoid Dendritic Cell %Dendritic Cell || id:ebi-a-GCST90001474	3410
rs143032729	1	160353789	G	A	0.0326	-0.3966	0.07264	5.11105e-08	Plasmacytoid Dendritic Cell %Dendritic Cell || id:ebi-a-GCST90001474	3410
rs74341264	1	161561151	A	G	0.1218	0.2502	0.03866	1.12001e-10	Plasmacytoid Dendritic Cell %Dendritic Cell || id:ebi-a-GCST90001474	3410
rs56199187	1	161520931	T	C	0.2441	-0.5887	0.02799	1.96517e-92	Plasmacytoid Dendritic Cell %Dendritic Cell || id:ebi-a-GCST90001474	3410
rs7593638	2	111876941	C	A	0.4749	0.1305	0.02526	2.52e-07	Plasmacytoid Dendritic Cell %Dendritic Cell || id:ebi-a-GCST90001474	3410
rs62234997	3	20754619	G	A	0.085	0.2108	0.04552	3.77703e-06	Plasmacytoid Dendritic Cell %Dendritic Cell || id:ebi-a-GCST90001474	3410
rs62272723	3	151963160	T	G	0.0501	-0.2775	0.05854	2.21202e-06	Plasmacytoid Dendritic Cell %Dendritic Cell || id:ebi-a-GCST90001474	3410
rs11715127	3	384169	C	G	0.1276	0.1657	0.03607	4.48198e-06	Plasmacytoid Dendritic Cell %Dendritic Cell || id:ebi-a-GCST90001474	3410
rs196051	6	22056131	G	A	0.3971	-0.1221	0.02607	2.90503e-06	Plasmacytoid Dendritic Cell %Dendritic Cell || id:ebi-a-GCST90001474	3410
rs876036	7	50307710	C	T	0.2645	-0.1835	0.02885	2.25201e-10	Plasmacytoid Dendritic Cell %Dendritic Cell || id:ebi-a-GCST90001474	3410
rs78726632	7	14195723	C	G	0.0097	0.6212	0.1274	1.14101e-06	Plasmacytoid Dendritic Cell %Dendritic Cell || id:ebi-a-GCST90001474	3410
rs4398989	9	110238601	A	G	0.0422	-0.2853	0.06219	4.65897e-06	Plasmacytoid Dendritic Cell %Dendritic Cell || id:ebi-a-GCST90001474	3410
rs4752481	10	122700529	T	G	0.4535	-0.1258	0.0253	6.93107e-07	Plasmacytoid Dendritic Cell %Dendritic Cell || id:ebi-a-GCST90001474	3410
rs79053113	10	133341271	T	C	0.0009	-1.939	0.4161	3.264e-06	Plasmacytoid Dendritic Cell %Dendritic Cell || id:ebi-a-GCST90001474	3410
rs10735429	12	108726677	G	A	0.7411	0.1338	0.02924	4.91802e-06	Plasmacytoid Dendritic Cell %Dendritic Cell || id:ebi-a-GCST90001474	3410
rs203393	20	56242563	A	G	0.5792	-0.1217	0.02505	1.23501e-06	Plasmacytoid Dendritic Cell %Dendritic Cell || id:ebi-a-GCST90001474	3410
rs9439731	1	19059471	C	T	0.3644	-0.1231	0.02626	2.85102e-06	HLA DR++ monocyte %monocyte || id:ebi-a-GCST90001475	3595
rs116670542	2	217877436	A	G	0.0008	-1.812	0.3917	3.84601e-06	HLA DR++ monocyte %monocyte || id:ebi-a-GCST90001475	3595
rs187260865	2	106940570	T	C	0.0185	-0.5052	0.09405	8.30902e-08	HLA DR++ monocyte %monocyte || id:ebi-a-GCST90001475	3595
rs62395272	6	31394424	T	C	0.2819	-0.2295	0.03657	3.90598e-10	HLA DR++ monocyte %monocyte || id:ebi-a-GCST90001475	3595
rs9271281	6	32581059	T	C	0.5808	-0.3029	0.03046	5.37155e-23	HLA DR++ monocyte %monocyte || id:ebi-a-GCST90001475	3595
rs9271768	6	32594188	G	A	0.4356	-0.2475	0.03213	1.68384e-14	HLA DR++ monocyte %monocyte || id:ebi-a-GCST90001475	3595
rs9296042	6	32736005	T	C	0.5013	-0.1923	0.02928	5.86138e-11	HLA DR++ monocyte %monocyte || id:ebi-a-GCST90001475	3595
rs9469094	6	32223191	C	G	0.0861	0.3326	0.05164	1.35101e-10	HLA DR++ monocyte %monocyte || id:ebi-a-GCST90001475	3595
rs116322630	6	15221128	T	C	0.0633	0.2678	0.05377	6.63804e-07	HLA DR++ monocyte %monocyte || id:ebi-a-GCST90001475	3595
rs2113347	8	3175873	C	G	0.2826	-0.1283	0.02784	4.20397e-06	HLA DR++ monocyte %monocyte || id:ebi-a-GCST90001475	3595
rs7953257	12	112684221	T	A	0.531	-0.1366	0.02719	5.34995e-07	HLA DR++ monocyte %monocyte || id:ebi-a-GCST90001475	3595
rs12436392	14	81293101	C	T	0.9897	0.5761	0.123	2.943e-06	HLA DR++ monocyte %monocyte || id:ebi-a-GCST90001475	3595
rs62083470	18	35262843	C	T	0.1305	-0.1742	0.03706	2.68201e-06	HLA DR++ monocyte %monocyte || id:ebi-a-GCST90001475	3595
rs6010756	20	61265397	C	A	0.0243	-0.3757	0.07989	2.67202e-06	HLA DR++ monocyte %monocyte || id:ebi-a-GCST90001475	3595
rs9439732	1	19059473	T	A	0.4732	-0.1324	0.02523	1.62401e-07	HLA DR++ monocyte %leukocyte || id:ebi-a-GCST90001476	3595
rs35478452	1	248035843	C	G	0.0065	-0.7033	0.1514	3.51504e-06	HLA DR++ monocyte %leukocyte || id:ebi-a-GCST90001476	3595
rs115589615	2	106954936	T	C	0.0175	-0.4683	0.09513	8.93203e-07	HLA DR++ monocyte %leukocyte || id:ebi-a-GCST90001476	3595
rs9271768	6	32594188	G	A	0.4356	-0.2168	0.03267	3.71878e-11	HLA DR++ monocyte %leukocyte || id:ebi-a-GCST90001476	3595
rs62395272	6	31394424	T	C	0.2819	-0.1829	0.03742	1.06999e-06	HLA DR++ monocyte %leukocyte || id:ebi-a-GCST90001476	3595
rs9270591	6	32561424	T	C	0.5793	-0.2715	0.03137	7.43875e-18	HLA DR++ monocyte %leukocyte || id:ebi-a-GCST90001476	3595
rs9296042	6	32736005	T	C	0.5013	-0.1611	0.02972	6.34498e-08	HLA DR++ monocyte %leukocyte || id:ebi-a-GCST90001476	3595
rs115589615	2	106954936	T	C	0.0176	-0.4684	0.09367	5.98494e-07	HLA DR++ monocyte Absolute Count || id:ebi-a-GCST90001477	3579
rs138955284	3	154844527	T	G	0.0047	-0.9382	0.1848	4.02504e-07	HLA DR++ monocyte Absolute Count || id:ebi-a-GCST90001477	3579
rs114141703	3	197226213	A	C	0.025	0.3833	0.08005	1.74699e-06	HLA DR++ monocyte Absolute Count || id:ebi-a-GCST90001477	3579
rs74827437	4	109128418	G	A	0.1018	0.1903	0.04129	4.20504e-06	HLA DR++ monocyte Absolute Count || id:ebi-a-GCST90001477	3579
rs73576356	6	147436169	T	A	0.0379	-0.2957	0.06466	4.98001e-06	HLA DR++ monocyte Absolute Count || id:ebi-a-GCST90001477	3579
rs9272459	6	32605578	A	G	0.5423	-0.1649	0.02958	2.66397e-08	HLA DR++ monocyte Absolute Count || id:ebi-a-GCST90001477	3579
rs62395272	6	31394424	T	C	0.2812	-0.1767	0.0353	5.79402e-07	HLA DR++ monocyte Absolute Count || id:ebi-a-GCST90001477	3579
rs9275271	6	32662533	C	T	0.6292	0.2356	0.03057	1.67494e-14	HLA DR++ monocyte Absolute Count || id:ebi-a-GCST90001477	3579
rs28610544	7	106771703	T	C	0.1692	0.1685	0.03275	2.831e-07	HLA DR++ monocyte Absolute Count || id:ebi-a-GCST90001477	3579
rs7310615	12	111865049	G	C	0.5222	-0.1431	0.02641	6.40398e-08	HLA DR++ monocyte Absolute Count || id:ebi-a-GCST90001477	3579
rs11169475	12	50914563	A	G	0.0296	-0.3396	0.07329	3.71604e-06	HLA DR++ monocyte Absolute Count || id:ebi-a-GCST90001477	3579
rs111801150	13	114508277	G	A	0.0013	-1.644	0.3396	1.33999e-06	HLA DR++ monocyte Absolute Count || id:ebi-a-GCST90001477	3579
rs55952218	16	73388512	A	G	0.0807	0.2123	0.04485	2.28402e-06	HLA DR++ monocyte Absolute Count || id:ebi-a-GCST90001477	3579
rs183181627	16	69003214	C	A	0.001	-1.803	0.3795	2.10902e-06	HLA DR++ monocyte Absolute Count || id:ebi-a-GCST90001477	3579
rs34795364	17	34011303	C	G	0.0011	-1.754	0.3818	4.489e-06	HLA DR++ monocyte Absolute Count || id:ebi-a-GCST90001477	3579
rs139181645	17	76469857	G	C	0.0451	-0.2801	0.05887	2.03301e-06	HLA DR++ monocyte Absolute Count || id:ebi-a-GCST90001477	3579
rs61289229	19	46392004	T	C	0.1133	0.1874	0.03947	2.14902e-06	HLA DR++ monocyte Absolute Count || id:ebi-a-GCST90001477	3579
rs5995959	22	22750190	T	C	0.0323	-0.3484	0.07506	3.58798e-06	HLA DR++ monocyte Absolute Count || id:ebi-a-GCST90001477	3579
rs181741769	1	26999658	C	T	0.002	1.241	0.2679	3.73603e-06	CD4 regulatory T cell %CD4+ T cell || id:ebi-a-GCST90001478	3437
rs13410035	2	161139489	T	C	0.0346	-0.3267	0.06743	1.322e-06	CD4 regulatory T cell %CD4+ T cell || id:ebi-a-GCST90001478	3437
rs77142596	6	163753664	T	C	0.0371	-0.307	0.06687	4.57804e-06	CD4 regulatory T cell %CD4+ T cell || id:ebi-a-GCST90001478	3437
rs2187822	6	32449726	C	A	0.3251	-0.1531	0.03337	4.65704e-06	CD4 regulatory T cell %CD4+ T cell || id:ebi-a-GCST90001478	3437
rs191172032	7	148149143	A	G	0.0253	0.3869	0.0825	2.83302e-06	CD4 regulatory T cell %CD4+ T cell || id:ebi-a-GCST90001478	3437
rs77615103	7	37406370	A	C	0.1484	0.1876	0.03743	5.62199e-07	CD4 regulatory T cell %CD4+ T cell || id:ebi-a-GCST90001478	3437
rs1571025	10	6134869	G	A	0.1766	0.2422	0.0339	1.10892e-12	CD4 regulatory T cell %CD4+ T cell || id:ebi-a-GCST90001478	3437
rs6602392	10	6078079	A	C	0.1155	0.2173	0.03926	3.33703e-08	CD4 regulatory T cell %CD4+ T cell || id:ebi-a-GCST90001478	3437
rs77071786	12	23501010	C	G	0.0598	-0.2858	0.05432	1.51901e-07	CD4 regulatory T cell %CD4+ T cell || id:ebi-a-GCST90001478	3437
rs149595513	14	56535269	T	C	0.0031	1.04	0.227	4.78597e-06	CD4 regulatory T cell %CD4+ T cell || id:ebi-a-GCST90001478	3437
rs72821912	17	30183388	T	C	0.045	0.2845	0.06114	3.38197e-06	CD4 regulatory T cell %CD4+ T cell || id:ebi-a-GCST90001478	3437
rs2909902	19	47667326	A	T	0.2784	-0.1357	0.02779	1.08101e-06	CD4 regulatory T cell %CD4+ T cell || id:ebi-a-GCST90001478	3437
rs6016476	20	39570656	G	A	0.3688	0.1213	0.02643	4.56604e-06	CD4 regulatory T cell %CD4+ T cell || id:ebi-a-GCST90001478	3437
rs79327855	3	144158111	T	C	0.0009	-1.849	0.3895	2.14798e-06	CD4 regulatory T cell %T cell || id:ebi-a-GCST90001479	3437
rs76239041	5	153002618	A	G	0.0412	0.3211	0.06468	7.21805e-07	CD4 regulatory T cell %T cell || id:ebi-a-GCST90001479	3437
rs2975007	6	29902327	T	G	0.4342	-0.1628	0.0337	1.42099e-06	CD4 regulatory T cell %T cell || id:ebi-a-GCST90001479	3437
rs971864	6	164597687	T	C	0.4588	0.1181	0.02572	4.56499e-06	CD4 regulatory T cell %T cell || id:ebi-a-GCST90001479	3437
rs6602392	10	6078079	A	C	0.1155	0.1917	0.04025	1.992e-06	CD4 regulatory T cell %T cell || id:ebi-a-GCST90001479	3437
rs1571025	10	6134869	G	A	0.1766	0.2054	0.03486	4.16898e-09	CD4 regulatory T cell %T cell || id:ebi-a-GCST90001479	3437
rs139191636	12	23591661	A	G	0.0634	-0.2479	0.05372	4.05798e-06	CD4 regulatory T cell %T cell || id:ebi-a-GCST90001479	3437
rs146090095	14	25035095	T	A	0.0708	-0.2506	0.04997	5.53796e-07	CD4 regulatory T cell %T cell || id:ebi-a-GCST90001479	3437
rs2526941	14	73155735	C	T	0.0358	0.323	0.06915	3.10599e-06	CD4 regulatory T cell %T cell || id:ebi-a-GCST90001479	3437
rs11869223	17	33775713	G	C	0.4364	-0.1191	0.02574	3.88597e-06	CD4 regulatory T cell %T cell || id:ebi-a-GCST90001479	3437
rs56043453	17	80189590	T	A	0.7704	0.1394	0.03038	4.622e-06	CD4 regulatory T cell %T cell || id:ebi-a-GCST90001479	3437
rs12044365	1	210431761	G	A	0.0248	-0.3482	0.07468	3.23698e-06	Resting CD4 regulatory T cell Absolute Count || id:ebi-a-GCST90001480	3405
rs116794175	1	194010208	C	T	0.0043	0.8994	0.1806	6.68498e-07	Resting CD4 regulatory T cell Absolute Count || id:ebi-a-GCST90001480	3405
rs17583875	1	197924770	A	G	0.0029	1.651	0.2111	6.94225e-15	Resting CD4 regulatory T cell Absolute Count || id:ebi-a-GCST90001480	3405
rs6751481	2	38897810	C	T	0.4699	0.2177	0.02348	3.10099e-20	Resting CD4 regulatory T cell Absolute Count || id:ebi-a-GCST90001480	3405
rs17607399	2	41884212	T	C	0.1084	0.1892	0.03839	8.66204e-07	Resting CD4 regulatory T cell Absolute Count || id:ebi-a-GCST90001480	3405
rs408686	2	39177320	A	C	0.814	-0.2089	0.03078	1.33291e-11	Resting CD4 regulatory T cell Absolute Count || id:ebi-a-GCST90001480	3405
rs979640	4	132525794	G	A	0.7852	-0.1339	0.02833	2.40099e-06	Resting CD4 regulatory T cell Absolute Count || id:ebi-a-GCST90001480	3405
rs247636	5	142990496	A	G	0.0363	-0.3186	0.06187	2.77e-07	Resting CD4 regulatory T cell Absolute Count || id:ebi-a-GCST90001480	3405
rs36058358	6	32636282	A	G	0.2229	-0.1784	0.03687	1.37e-06	Resting CD4 regulatory T cell Absolute Count || id:ebi-a-GCST90001480	3405
rs9272050	6	32599071	A	G	0.7012	0.1633	0.03024	7.09692e-08	Resting CD4 regulatory T cell Absolute Count || id:ebi-a-GCST90001480	3405
rs1618199	6	31275850	A	G	0.3771	0.1509	0.0328	4.37502e-06	Resting CD4 regulatory T cell Absolute Count || id:ebi-a-GCST90001480	3405
rs182630194	7	71331239	A	G	0.0013	1.635	0.3213	3.81399e-07	Resting CD4 regulatory T cell Absolute Count || id:ebi-a-GCST90001480	3405
rs147199078	7	80542211	C	T	0.0295	0.3441	0.06816	4.685e-07	Resting CD4 regulatory T cell Absolute Count || id:ebi-a-GCST90001480	3405
rs7787732	7	151861663	C	T	0.0793	0.1935	0.04143	3.13899e-06	Resting CD4 regulatory T cell Absolute Count || id:ebi-a-GCST90001480	3405
rs7899451	10	118980344	G	C	0.2803	-0.1238	0.02622	2.45002e-06	Resting CD4 regulatory T cell Absolute Count || id:ebi-a-GCST90001480	3405
rs16922479	10	22863004	C	T	0.1094	-0.1773	0.03726	2.02899e-06	Resting CD4 regulatory T cell Absolute Count || id:ebi-a-GCST90001480	3405
rs3016770	11	128694040	G	T	0.89	-0.1819	0.03707	9.74002e-07	Resting CD4 regulatory T cell Absolute Count || id:ebi-a-GCST90001480	3405
rs75958070	11	79203049	C	G	0.1217	-0.2006	0.03612	3.01801e-08	Resting CD4 regulatory T cell Absolute Count || id:ebi-a-GCST90001480	3405
rs8088253	18	64904859	G	A	0.0467	0.2852	0.05469	1.94299e-07	Resting CD4 regulatory T cell Absolute Count || id:ebi-a-GCST90001480	3405
rs111941642	22	28079761	T	C	0.0144	-0.476	0.09652	8.56407e-07	Resting CD4 regulatory T cell Absolute Count || id:ebi-a-GCST90001480	3405
rs187089343	1	182091538	C	A	0.0047	0.9806	0.1707	1.00399e-08	Resting CD4 regulatory T cell %CD4 regulatory T cell || id:ebi-a-GCST90001481	3437
rs150956189	1	214625781	C	T	0.0003	2.691	0.5693	2.36701e-06	Resting CD4 regulatory T cell %CD4 regulatory T cell || id:ebi-a-GCST90001481	3437
rs61828007	1	203502968	G	A	0.0289	0.3706	0.06927	9.34695e-08	Resting CD4 regulatory T cell %CD4 regulatory T cell || id:ebi-a-GCST90001481	3437
rs12133465	1	195430336	G	A	0.0096	0.7179	0.1158	6.33097e-10	Resting CD4 regulatory T cell %CD4 regulatory T cell || id:ebi-a-GCST90001481	3437
rs146899923	1	195919849	C	T	0.0089	0.7278	0.1254	7.07995e-09	Resting CD4 regulatory T cell %CD4 regulatory T cell || id:ebi-a-GCST90001481	3437
rs60220946	1	193505625	T	C	0.0212	0.4297	0.07742	3.079e-08	Resting CD4 regulatory T cell %CD4 regulatory T cell || id:ebi-a-GCST90001481	3437
rs147071297	1	191648600	A	G	0.0039	1.292	0.1788	6.13762e-13	Resting CD4 regulatory T cell %CD4 regulatory T cell || id:ebi-a-GCST90001481	3437
rs7530076	1	195825276	A	G	0.9748	-0.463	0.07456	5.95498e-10	Resting CD4 regulatory T cell %CD4 regulatory T cell || id:ebi-a-GCST90001481	3437
rs17583875	1	197924770	A	G	0.0029	2.714	0.2018	3.21514e-40	Resting CD4 regulatory T cell %CD4 regulatory T cell || id:ebi-a-GCST90001481	3437
rs138915779	1	190079170	A	C	0.0035	1.793	0.2061	4.92833e-18	Resting CD4 regulatory T cell %CD4 regulatory T cell || id:ebi-a-GCST90001481	3437
rs112553628	2	38077329	G	A	0.0352	0.2951	0.06128	1.53801e-06	Resting CD4 regulatory T cell %CD4 regulatory T cell || id:ebi-a-GCST90001481	3437
rs413431	2	39176695	G	A	0.8154	-0.2777	0.02969	1.46791e-20	Resting CD4 regulatory T cell %CD4 regulatory T cell || id:ebi-a-GCST90001481	3437
rs139681117	2	23924920	T	C	0.0528	0.2445	0.05221	2.93697e-06	Resting CD4 regulatory T cell %CD4 regulatory T cell || id:ebi-a-GCST90001481	3437
rs6751481	2	38897810	C	T	0.4709	0.2946	0.02252	3.39782e-38	Resting CD4 regulatory T cell %CD4 regulatory T cell || id:ebi-a-GCST90001481	3437
rs17607399	2	41884212	T	C	0.1084	0.209	0.03723	2.14102e-08	Resting CD4 regulatory T cell %CD4 regulatory T cell || id:ebi-a-GCST90001481	3437
rs10059100	5	120100784	G	A	0.3224	-0.1194	0.02467	1.357e-06	Resting CD4 regulatory T cell %CD4 regulatory T cell || id:ebi-a-GCST90001481	3437
rs9274712	6	32637298	T	C	0.3326	-0.1758	0.03533	6.79908e-07	Resting CD4 regulatory T cell %CD4 regulatory T cell || id:ebi-a-GCST90001481	3437
rs12722496	10	6096667	G	A	0.0611	-0.2244	0.0482	3.34603e-06	Resting CD4 regulatory T cell %CD4 regulatory T cell || id:ebi-a-GCST90001481	3437
rs192123974	11	13923816	T	C	0.0016	1.588	0.3176	5.99501e-07	Resting CD4 regulatory T cell %CD4 regulatory T cell || id:ebi-a-GCST90001481	3437
rs73124650	20	47523429	C	T	0.0249	0.3448	0.07228	1.91501e-06	Resting CD4 regulatory T cell %CD4 regulatory T cell || id:ebi-a-GCST90001481	3437
rs79670457	20	47437969	T	C	0.0541	0.2321	0.04896	2.227e-06	Resting CD4 regulatory T cell %CD4 regulatory T cell || id:ebi-a-GCST90001481	3437
rs147958143	1	238096255	T	A	0.0111	-0.5364	0.1072	5.938e-07	Resting CD4 regulatory T cell %CD4+ T cell || id:ebi-a-GCST90001482	3437
rs7530076	1	195825276	A	G	0.9748	-0.3827	0.07667	6.27697e-07	Resting CD4 regulatory T cell %CD4+ T cell || id:ebi-a-GCST90001482	3437
rs146899923	1	195919849	C	T	0.0089	0.6595	0.129	3.36403e-07	Resting CD4 regulatory T cell %CD4+ T cell || id:ebi-a-GCST90001482	3437
rs12141656	1	189081342	G	T	0.0092	0.6122	0.1213	4.72705e-07	Resting CD4 regulatory T cell %CD4+ T cell || id:ebi-a-GCST90001482	3437
rs147071297	1	191648600	A	G	0.0039	1.123	0.1849	1.40001e-09	Resting CD4 regulatory T cell %CD4+ T cell || id:ebi-a-GCST90001482	3437
rs150956189	1	214625781	C	T	0.0003	2.897	0.5951	1.17999e-06	Resting CD4 regulatory T cell %CD4+ T cell || id:ebi-a-GCST90001482	3437
rs12133465	1	195430336	G	A	0.0096	0.6418	0.1191	7.59801e-08	Resting CD4 regulatory T cell %CD4+ T cell || id:ebi-a-GCST90001482	3437
rs17583875	1	197924770	A	G	0.0029	2.309	0.2094	8.26228e-28	Resting CD4 regulatory T cell %CD4+ T cell || id:ebi-a-GCST90001482	3437
rs138915779	1	190079170	A	C	0.0035	1.439	0.2131	1.72108e-11	Resting CD4 regulatory T cell %CD4+ T cell || id:ebi-a-GCST90001482	3437
rs115383271	2	39367533	A	C	0.0541	0.2552	0.0517	8.37202e-07	Resting CD4 regulatory T cell %CD4+ T cell || id:ebi-a-GCST90001482	3437
rs17607399	2	41884212	T	C	0.1084	0.1996	0.03805	1.64399e-07	Resting CD4 regulatory T cell %CD4+ T cell || id:ebi-a-GCST90001482	3437
rs6751481	2	38897810	C	T	0.4709	0.2762	0.0232	4.7841e-32	Resting CD4 regulatory T cell %CD4+ T cell || id:ebi-a-GCST90001482	3437
rs408686	2	39177320	A	C	0.8142	-0.2655	0.03044	4.21988e-18	Resting CD4 regulatory T cell %CD4+ T cell || id:ebi-a-GCST90001482	3437
rs112553628	2	38077329	G	A	0.0352	0.2882	0.06287	4.72596e-06	Resting CD4 regulatory T cell %CD4+ T cell || id:ebi-a-GCST90001482	3437
rs247636	5	142990496	A	G	0.0361	-0.2906	0.06183	2.69501e-06	Resting CD4 regulatory T cell %CD4+ T cell || id:ebi-a-GCST90001482	3437
rs1084331	6	125213827	G	A	0.8586	-0.1546	0.03375	4.81804e-06	Resting CD4 regulatory T cell %CD4+ T cell || id:ebi-a-GCST90001482	3437
rs4959016	6	31297833	T	C	0.5928	-0.1474	0.03155	3.11903e-06	Resting CD4 regulatory T cell %CD4+ T cell || id:ebi-a-GCST90001482	3437
rs62405562	6	32451834	G	A	0.4537	-0.155	0.02965	1.834e-07	Resting CD4 regulatory T cell %CD4+ T cell || id:ebi-a-GCST90001482	3437
rs192123974	11	13923816	T	C	0.0016	1.539	0.3266	2.53799e-06	Resting CD4 regulatory T cell %CD4+ T cell || id:ebi-a-GCST90001482	3437
rs79505492	11	79167993	G	A	0.09	-0.1913	0.04122	3.61002e-06	Resting CD4 regulatory T cell %CD4+ T cell || id:ebi-a-GCST90001482	3437
rs145833948	12	41804479	A	C	0.0425	0.2778	0.05849	2.11602e-06	Resting CD4 regulatory T cell %CD4+ T cell || id:ebi-a-GCST90001482	3437
rs76384362	12	15365872	T	C	0.0212	0.3703	0.0807	4.617e-06	Resting CD4 regulatory T cell %CD4+ T cell || id:ebi-a-GCST90001482	3437
rs72744142	15	81518947	A	G	0.1507	-0.1499	0.03278	4.93503e-06	Resting CD4 regulatory T cell %CD4+ T cell || id:ebi-a-GCST90001482	3437
rs117680001	17	13652401	A	C	0.0105	0.5355	0.117	4.91496e-06	Resting CD4 regulatory T cell %CD4+ T cell || id:ebi-a-GCST90001482	3437
rs79524476	19	40973561	G	C	0.1477	0.1481	0.03202	3.86296e-06	Resting CD4 regulatory T cell %CD4+ T cell || id:ebi-a-GCST90001482	3437
rs17583875	1	197924770	A	G	0.0029	2.134	0.2233	2.16721e-21	CD39+ resting CD4 regulatory T cell Absolute Count || id:ebi-a-GCST90001483	3405
rs190023756	1	199471227	A	G	0.0101	0.6136	0.1211	4.23701e-07	CD39+ resting CD4 regulatory T cell Absolute Count || id:ebi-a-GCST90001483	3405
rs146899923	1	195919849	C	T	0.009	0.8565	0.1368	4.292e-10	CD39+ resting CD4 regulatory T cell Absolute Count || id:ebi-a-GCST90001483	3405
rs138915779	1	190079170	A	C	0.0034	1.188	0.2275	1.88899e-07	CD39+ resting CD4 regulatory T cell Absolute Count || id:ebi-a-GCST90001483	3405
rs11890666	2	38745822	A	G	0.2875	-0.1566	0.02815	2.88403e-08	CD39+ resting CD4 regulatory T cell Absolute Count || id:ebi-a-GCST90001483	3405
rs78096816	2	53370856	C	A	0.0013	1.521	0.3287	3.84698e-06	CD39+ resting CD4 regulatory T cell Absolute Count || id:ebi-a-GCST90001483	3405
rs12712610	2	38897249	G	A	0.2972	0.1912	0.02749	4.16486e-12	CD39+ resting CD4 regulatory T cell Absolute Count || id:ebi-a-GCST90001483	3405
rs138807420	5	6231929	T	A	0.0034	1.024	0.2041	5.48504e-07	CD39+ resting CD4 regulatory T cell Absolute Count || id:ebi-a-GCST90001483	3405
rs10086961	8	132897157	C	T	0.2797	-0.1276	0.02767	4.09902e-06	CD39+ resting CD4 regulatory T cell Absolute Count || id:ebi-a-GCST90001483	3405
rs111534725	10	98139264	T	G	0.0408	0.7719	0.06357	3.05703e-33	CD39+ resting CD4 regulatory T cell Absolute Count || id:ebi-a-GCST90001483	3405
rs117678654	10	101548054	A	C	0.0107	0.6017	0.1206	6.32397e-07	CD39+ resting CD4 regulatory T cell Absolute Count || id:ebi-a-GCST90001483	3405
rs7079761	10	97842115	A	G	0.0554	0.7212	0.05595	3.74542e-37	CD39+ resting CD4 regulatory T cell Absolute Count || id:ebi-a-GCST90001483	3405
rs35909109	10	98014850	T	C	0.0464	0.3601	0.06066	3.22203e-09	CD39+ resting CD4 regulatory T cell Absolute Count || id:ebi-a-GCST90001483	3405
rs77520132	10	98160835	A	G	0.046	0.5828	0.05899	1.02896e-22	CD39+ resting CD4 regulatory T cell Absolute Count || id:ebi-a-GCST90001483	3405
rs143132810	10	96890004	C	T	0.0263	0.6358	0.0789	1.06709e-15	CD39+ resting CD4 regulatory T cell Absolute Count || id:ebi-a-GCST90001483	3405
rs117572834	10	109896541	G	T	0.0031	-1.021	0.2137	1.82802e-06	CD39+ resting CD4 regulatory T cell Absolute Count || id:ebi-a-GCST90001483	3405
rs192831774	10	95387682	T	A	0.0311	0.4945	0.0724	1.00392e-11	CD39+ resting CD4 regulatory T cell Absolute Count || id:ebi-a-GCST90001483	3405
rs185474383	10	96311553	T	G	0.021	0.5292	0.08658	1.096e-09	CD39+ resting CD4 regulatory T cell Absolute Count || id:ebi-a-GCST90001483	3405
rs4918971	10	97569998	G	C	0.4264	0.8068	0.02149	1e-200	CD39+ resting CD4 regulatory T cell Absolute Count || id:ebi-a-GCST90001483	3405
rs72809762	10	97294154	T	C	0.0675	0.4336	0.04951	3.04299e-18	CD39+ resting CD4 regulatory T cell Absolute Count || id:ebi-a-GCST90001483	3405
rs6488275	12	10379180	T	C	0.8774	-0.1716	0.03738	4.55795e-06	CD39+ resting CD4 regulatory T cell Absolute Count || id:ebi-a-GCST90001483	3405
rs78843390	12	130031612	T	C	0.0094	0.6066	0.1302	3.28799e-06	CD39+ resting CD4 regulatory T cell Absolute Count || id:ebi-a-GCST90001483	3405
rs78654607	16	83070118	G	C	0.0329	-0.3394	0.07017	1.38099e-06	CD39+ resting CD4 regulatory T cell Absolute Count || id:ebi-a-GCST90001483	3405
rs115328872	1	197921246	A	G	0.0036	1.259	0.199	2.81598e-10	CD39+ resting CD4 regulatory T cell %resting CD4 regulatory T cell || id:ebi-a-GCST90001484	3437
rs146899923	1	195919849	C	T	0.0089	0.66	0.1367	1.44901e-06	CD39+ resting CD4 regulatory T cell %resting CD4 regulatory T cell || id:ebi-a-GCST90001484	3437
rs183612488	2	97689175	C	T	0.001	1.767	0.3749	2.52802e-06	CD39+ resting CD4 regulatory T cell %resting CD4 regulatory T cell || id:ebi-a-GCST90001484	3437
rs75834156	2	38911130	T	C	0.1589	-0.1662	0.03462	1.64301e-06	CD39+ resting CD4 regulatory T cell %resting CD4 regulatory T cell || id:ebi-a-GCST90001484	3437
rs77718305	2	85424907	T	C	0.0425	0.2854	0.06134	3.41397e-06	CD39+ resting CD4 regulatory T cell %resting CD4 regulatory T cell || id:ebi-a-GCST90001484	3437
rs11718018	3	60364770	C	T	0.4149	-0.1175	0.02509	2.90402e-06	CD39+ resting CD4 regulatory T cell %resting CD4 regulatory T cell || id:ebi-a-GCST90001484	3437
rs141700904	6	57764436	G	A	0.0124	0.5307	0.1133	2.91099e-06	CD39+ resting CD4 regulatory T cell %resting CD4 regulatory T cell || id:ebi-a-GCST90001484	3437
rs73196633	7	86574111	C	A	0.1977	-0.1457	0.03152	3.93604e-06	CD39+ resting CD4 regulatory T cell %resting CD4 regulatory T cell || id:ebi-a-GCST90001484	3437
rs7077127	10	18717348	T	G	0.2054	-0.1424	0.03091	4.26796e-06	CD39+ resting CD4 regulatory T cell %resting CD4 regulatory T cell || id:ebi-a-GCST90001484	3437
rs192831774	10	95387682	T	A	0.0313	0.5858	0.07135	3.07326e-16	CD39+ resting CD4 regulatory T cell %resting CD4 regulatory T cell || id:ebi-a-GCST90001484	3437
rs118112011	10	97204949	G	A	0.0095	0.647	0.1268	3.49897e-07	CD39+ resting CD4 regulatory T cell %resting CD4 regulatory T cell || id:ebi-a-GCST90001484	3437
rs4918962	10	97475574	C	A	0.5738	-0.8878	0.02028	1e-200	CD39+ resting CD4 regulatory T cell %resting CD4 regulatory T cell || id:ebi-a-GCST90001484	3437
rs1923692	10	98173715	G	T	0.9453	-0.5718	0.0529	8.3888e-27	CD39+ resting CD4 regulatory T cell %resting CD4 regulatory T cell || id:ebi-a-GCST90001484	3437
rs10882701	10	97741071	C	A	0.5141	-0.3681	0.02438	6.65733e-50	CD39+ resting CD4 regulatory T cell %resting CD4 regulatory T cell || id:ebi-a-GCST90001484	3437
rs4293064	10	107757380	A	C	0.0899	0.2434	0.04326	1.97601e-08	CD39+ resting CD4 regulatory T cell %resting CD4 regulatory T cell || id:ebi-a-GCST90001484	3437
rs12778837	10	96998744	C	T	0.3595	0.2009	0.02654	4.84842e-14	CD39+ resting CD4 regulatory T cell %resting CD4 regulatory T cell || id:ebi-a-GCST90001484	3437
rs72809757	10	97285715	G	A	0.0588	0.5451	0.05251	7.06968e-25	CD39+ resting CD4 regulatory T cell %resting CD4 regulatory T cell || id:ebi-a-GCST90001484	3437
rs7963011	12	10389074	T	C	0.2733	0.125	0.02724	4.62104e-06	CD39+ resting CD4 regulatory T cell %resting CD4 regulatory T cell || id:ebi-a-GCST90001484	3437
rs61821998	1	193263354	A	T	0.0215	0.4208	0.08415	6.01395e-07	CD39+ resting CD4 regulatory T cell %CD4 regulatory T cell || id:ebi-a-GCST90001485	3437
rs34645541	1	195875605	A	C	0.0095	0.7843	0.1289	1.293e-09	CD39+ resting CD4 regulatory T cell %CD4 regulatory T cell || id:ebi-a-GCST90001485	3437
rs116794175	1	194010208	C	T	0.0042	1.311	0.1905	6.98232e-12	CD39+ resting CD4 regulatory T cell %CD4 regulatory T cell || id:ebi-a-GCST90001485	3437
rs113435341	1	198151688	G	A	0.0032	2.267	0.2171	3.79315e-25	CD39+ resting CD4 regulatory T cell %CD4 regulatory T cell || id:ebi-a-GCST90001485	3437
rs11579717	1	199999121	A	G	0.0044	1.718	0.1835	1.35114e-20	CD39+ resting CD4 regulatory T cell %CD4 regulatory T cell || id:ebi-a-GCST90001485	3437
rs187089343	1	182091538	C	A	0.0047	0.8819	0.1864	2.31702e-06	CD39+ resting CD4 regulatory T cell %CD4 regulatory T cell || id:ebi-a-GCST90001485	3437
rs78096816	2	53370856	C	A	0.0013	1.581	0.3277	1.46599e-06	CD39+ resting CD4 regulatory T cell %CD4 regulatory T cell || id:ebi-a-GCST90001485	3437
rs12712610	2	38897249	G	A	0.2975	0.201	0.02719	1.82684e-13	CD39+ resting CD4 regulatory T cell %CD4 regulatory T cell || id:ebi-a-GCST90001485	3437
rs115977640	2	160238519	A	C	0.0077	0.6189	0.1337	3.82904e-06	CD39+ resting CD4 regulatory T cell %CD4 regulatory T cell || id:ebi-a-GCST90001485	3437
rs11890666	2	38745822	A	G	0.2866	-0.1612	0.02787	7.94292e-09	CD39+ resting CD4 regulatory T cell %CD4 regulatory T cell || id:ebi-a-GCST90001485	3437
rs150096082	3	126743223	A	G		14.69	2.928	5.53095e-07	CD39+ resting CD4 regulatory T cell %CD4 regulatory T cell || id:ebi-a-GCST90001485	3437
rs12518588	5	85325148	G	T	0.412	0.1241	0.02523	9.15398e-07	CD39+ resting CD4 regulatory T cell %CD4 regulatory T cell || id:ebi-a-GCST90001485	3437
rs10086961	8	132897157	C	T	0.28	-0.1275	0.02736	3.29602e-06	CD39+ resting CD4 regulatory T cell %CD4 regulatory T cell || id:ebi-a-GCST90001485	3437
rs11818051	10	97972294	T	C	0.0317	0.6998	0.0719	4.23741e-22	CD39+ resting CD4 regulatory T cell %CD4 regulatory T cell || id:ebi-a-GCST90001485	3437
rs4918969	10	97562938	A	G	0.4267	0.8426	0.02078	1e-200	CD39+ resting CD4 regulatory T cell %CD4 regulatory T cell || id:ebi-a-GCST90001485	3437
rs35909109	10	98014850	T	C	0.0464	0.3811	0.05993	2.29901e-10	CD39+ resting CD4 regulatory T cell %CD4 regulatory T cell || id:ebi-a-GCST90001485	3437
rs117572834	10	109896541	G	T	0.0031	-1.108	0.2135	2.25299e-07	CD39+ resting CD4 regulatory T cell %CD4 regulatory T cell || id:ebi-a-GCST90001485	3437
rs182702572	10	96658384	A	C	0.0295	0.5464	0.07402	1.95119e-13	CD39+ resting CD4 regulatory T cell %CD4 regulatory T cell || id:ebi-a-GCST90001485	3437
rs1410600	10	97070694	T	C	0.4069	-0.2216	0.02536	3.58922e-18	CD39+ resting CD4 regulatory T cell %CD4 regulatory T cell || id:ebi-a-GCST90001485	3437
rs12778837	10	96998744	C	T	0.3595	0.1965	0.02651	1.5531e-13	CD39+ resting CD4 regulatory T cell %CD4 regulatory T cell || id:ebi-a-GCST90001485	3437
rs111534725	10	98139264	T	G	0.0409	0.8056	0.06291	1.05512e-36	CD39+ resting CD4 regulatory T cell %CD4 regulatory T cell || id:ebi-a-GCST90001485	3437
rs17111341	10	97881031	C	T	0.0666	0.6853	0.05013	1.85909e-41	CD39+ resting CD4 regulatory T cell %CD4 regulatory T cell || id:ebi-a-GCST90001485	3437
rs77520132	10	98160835	A	G	0.0464	0.6067	0.05819	4.4412e-25	CD39+ resting CD4 regulatory T cell %CD4 regulatory T cell || id:ebi-a-GCST90001485	3437
rs78843390	12	130031612	T	C	0.0093	0.6146	0.1296	2.17701e-06	CD39+ resting CD4 regulatory T cell %CD4 regulatory T cell || id:ebi-a-GCST90001485	3437
rs78654607	16	83070118	G	C	0.033	-0.3327	0.06909	1.52999e-06	CD39+ resting CD4 regulatory T cell %CD4 regulatory T cell || id:ebi-a-GCST90001485	3437
rs116988060	18	34080354	T	A	0.0031	1.095	0.2254	1.24799e-06	CD39+ resting CD4 regulatory T cell %CD4 regulatory T cell || id:ebi-a-GCST90001485	3437
rs2326054	20	3033175	C	T	0.0628	-0.2311	0.04963	3.34503e-06	CD39+ resting CD4 regulatory T cell %CD4 regulatory T cell || id:ebi-a-GCST90001485	3437
rs113435341	1	198151688	G	A	0.0032	-1.414	0.2277	5.87801e-10	Activated CD4 regulatory T cell Absolute Count || id:ebi-a-GCST90001486	3405
rs139138505	1	225667295	G	C	0.0085	-0.6234	0.1355	4.38097e-06	Activated CD4 regulatory T cell Absolute Count || id:ebi-a-GCST90001486	3405
rs138915779	1	190079170	A	C	0.0034	-1.288	0.2345	4.23204e-08	Activated CD4 regulatory T cell Absolute Count || id:ebi-a-GCST90001486	3405
rs6901124	6	109035704	T	C	0.0044	0.9001	0.1901	2.27499e-06	Activated CD4 regulatory T cell Absolute Count || id:ebi-a-GCST90001486	3405
rs11593335	10	6160702	T	A	0.4164	-0.1265	0.02623	1.48201e-06	Activated CD4 regulatory T cell Absolute Count || id:ebi-a-GCST90001486	3405
rs148991751	12	53114409	C	A	0.0004	-2.9	0.633	4.78101e-06	Activated CD4 regulatory T cell Absolute Count || id:ebi-a-GCST90001486	3405
rs12626270	21	34223997	T	C	0.1232	0.1817	0.03912	3.55402e-06	Activated CD4 regulatory T cell Absolute Count || id:ebi-a-GCST90001486	3405
rs17583875	1	197924770	A	G	0.0029	-1.532	0.2241	9.63163e-12	Activated CD4 regulatory T cell %CD4 regulatory T cell || id:ebi-a-GCST90001487	3437
rs138915779	1	190079170	A	C	0.0035	-1.347	0.2241	2.06201e-09	Activated CD4 regulatory T cell %CD4 regulatory T cell || id:ebi-a-GCST90001487	3437
rs138751156	1	77300547	C	T	0.0546	0.2723	0.05492	7.49808e-07	Activated CD4 regulatory T cell %CD4 regulatory T cell || id:ebi-a-GCST90001487	3437
rs76151354	1	104827341	A	G	0.0432	-0.2757	0.05999	4.44601e-06	Activated CD4 regulatory T cell %CD4 regulatory T cell || id:ebi-a-GCST90001487	3437
rs7530076	1	195825276	A	G	0.9748	0.4628	0.08043	9.517e-09	Activated CD4 regulatory T cell %CD4 regulatory T cell || id:ebi-a-GCST90001487	3437
rs11185398	1	104762898	G	A	0.0615	-0.2394	0.05089	2.64698e-06	Activated CD4 regulatory T cell %CD4 regulatory T cell || id:ebi-a-GCST90001487	3437
rs147071297	1	191648600	A	G	0.0039	-0.964	0.1968	1.01501e-06	Activated CD4 regulatory T cell %CD4 regulatory T cell || id:ebi-a-GCST90001487	3437
rs115862633	2	229924038	G	T	0.0041	-0.8837	0.192	4.30695e-06	Activated CD4 regulatory T cell %CD4 regulatory T cell || id:ebi-a-GCST90001487	3437
rs34185703	3	94030311	A	G	0.1852	0.1469	0.03152	3.28897e-06	Activated CD4 regulatory T cell %CD4 regulatory T cell || id:ebi-a-GCST90001487	3437
rs75839545	3	174387584	C	T	0.0223	0.3951	0.08349	2.30802e-06	Activated CD4 regulatory T cell %CD4 regulatory T cell || id:ebi-a-GCST90001487	3437
rs9878966	3	14636829	C	T	0.1609	0.1526	0.03307	4.08103e-06	Activated CD4 regulatory T cell %CD4 regulatory T cell || id:ebi-a-GCST90001487	3437
rs368899879	4	29697653	C	G	0.1231	-0.1829	0.03954	3.87097e-06	Activated CD4 regulatory T cell %CD4 regulatory T cell || id:ebi-a-GCST90001487	3437
rs7784817	7	23752731	T	C	0.0889	0.2021	0.04291	2.57602e-06	Activated CD4 regulatory T cell %CD4 regulatory T cell || id:ebi-a-GCST90001487	3437
rs139502175	8	131952722	C	G	0.0335	-0.3153	0.06883	4.78399e-06	Activated CD4 regulatory T cell %CD4 regulatory T cell || id:ebi-a-GCST90001487	3437
rs73697379	8	106542599	A	G	0.1423	0.1611	0.03504	4.44795e-06	Activated CD4 regulatory T cell %CD4 regulatory T cell || id:ebi-a-GCST90001487	3437
rs7035176	9	119577258	C	G	0.1759	0.1524	0.03107	9.78994e-07	Activated CD4 regulatory T cell %CD4 regulatory T cell || id:ebi-a-GCST90001487	3437
rs11066188	12	112610714	A	G	0.4658	-0.1254	0.02574	1.15001e-06	Activated CD4 regulatory T cell %CD4 regulatory T cell || id:ebi-a-GCST90001487	3437
rs117140551	19	23103264	T	A	0.0285	0.3619	0.0751	1.509e-06	Activated CD4 regulatory T cell %CD4 regulatory T cell || id:ebi-a-GCST90001487	3437
rs56295335	1	10062088	A	G	0.0898	0.2145	0.04447	1.47201e-06	Activated CD4 regulatory T cell %CD4+ T cell || id:ebi-a-GCST90001488	3437
rs112009416	1	199163362	C	T	0.0089	-0.6866	0.133	2.556e-07	Activated CD4 regulatory T cell %CD4+ T cell || id:ebi-a-GCST90001488	3437
rs138915779	1	190079170	A	C	0.0035	-1.152	0.2291	5.25001e-07	Activated CD4 regulatory T cell %CD4+ T cell || id:ebi-a-GCST90001488	3437
rs149143064	2	39755475	A	G	0.0276	-0.354	0.07702	4.46303e-06	Activated CD4 regulatory T cell %CD4+ T cell || id:ebi-a-GCST90001488	3437
rs10511150	3	94952474	A	G	0.2376	0.1452	0.03006	1.434e-06	Activated CD4 regulatory T cell %CD4+ T cell || id:ebi-a-GCST90001488	3437
rs4109437	4	190769223	A	G	0.0083	-0.7478	0.1478	4.42099e-07	Activated CD4 regulatory T cell %CD4+ T cell || id:ebi-a-GCST90001488	3437
rs16903407	5	2165975	T	G	0.0156	0.4769	0.09746	1.037e-06	Activated CD4 regulatory T cell %CD4+ T cell || id:ebi-a-GCST90001488	3437
rs7078614	10	6075831	T	G	0.3413	0.1375	0.02638	1.963e-07	Activated CD4 regulatory T cell %CD4+ T cell || id:ebi-a-GCST90001488	3437
rs597808	12	111973358	G	A	0.5349	0.1264	0.02682	2.536e-06	Activated CD4 regulatory T cell %CD4+ T cell || id:ebi-a-GCST90001488	3437
rs117140551	19	23103264	T	A	0.0285	0.3571	0.07653	3.18603e-06	Activated CD4 regulatory T cell %CD4+ T cell || id:ebi-a-GCST90001488	3437
rs7432284	3	186094684	C	A	0.068	0.2441	0.05017	1.196e-06	CD39+ activated CD4 regulatory T cell Absolute Count || id:ebi-a-GCST90001489	3405
rs139015125	4	165512454	C	G	0.0231	-0.401	0.08506	2.52802e-06	CD39+ activated CD4 regulatory T cell Absolute Count || id:ebi-a-GCST90001489	3405
rs12648210	4	89266460	G	A	0.0145	-0.5171	0.1056	1.01801e-06	CD39+ activated CD4 regulatory T cell Absolute Count || id:ebi-a-GCST90001489	3405
rs142422333	5	155375550	T	C	0.0515	-0.2705	0.05905	4.782e-06	CD39+ activated CD4 regulatory T cell Absolute Count || id:ebi-a-GCST90001489	3405
rs78027772	7	126248228	A	G	0.0846	0.2212	0.04672	2.29398e-06	CD39+ activated CD4 regulatory T cell Absolute Count || id:ebi-a-GCST90001489	3405
rs12707040	7	80480551	A	G	0.1783	0.1591	0.03418	3.37404e-06	CD39+ activated CD4 regulatory T cell Absolute Count || id:ebi-a-GCST90001489	3405
rs139577399	7	23203415	C	T	0.0414	-0.3155	0.06457	1.08101e-06	CD39+ activated CD4 regulatory T cell Absolute Count || id:ebi-a-GCST90001489	3405
rs11777493	8	113921646	A	T	0.2395	-0.1467	0.0305	1.57101e-06	CD39+ activated CD4 regulatory T cell Absolute Count || id:ebi-a-GCST90001489	3405
rs35163827	8	9606332	G	A	0.0391	-0.3443	0.07172	1.646e-06	CD39+ activated CD4 regulatory T cell Absolute Count || id:ebi-a-GCST90001489	3405
rs7088584	10	97607644	T	G	0.4687	0.8768	0.02116	1e-200	CD39+ activated CD4 regulatory T cell Absolute Count || id:ebi-a-GCST90001489	3405
rs72809762	10	97294154	T	C	0.0675	0.3373	0.0511	4.74351e-11	CD39+ activated CD4 regulatory T cell Absolute Count || id:ebi-a-GCST90001489	3405
rs2251521	10	109471331	T	C	0.1021	-0.197	0.04279	4.27996e-06	CD39+ activated CD4 regulatory T cell Absolute Count || id:ebi-a-GCST90001489	3405
rs10882701	10	97741071	C	A	0.514	-0.3631	0.02528	1.80094e-45	CD39+ activated CD4 regulatory T cell Absolute Count || id:ebi-a-GCST90001489	3405
rs11188757	10	98205222	C	A	0.2213	-0.2494	0.03146	3.05914e-15	CD39+ activated CD4 regulatory T cell Absolute Count || id:ebi-a-GCST90001489	3405
rs111806244	10	47637202	T	C	0.0476	-0.3653	0.07836	3.26302e-06	CD39+ activated CD4 regulatory T cell Absolute Count || id:ebi-a-GCST90001489	3405
rs10786199	10	97069472	A	G	0.2894	-0.189	0.02875	5.63248e-11	CD39+ activated CD4 regulatory T cell Absolute Count || id:ebi-a-GCST90001489	3405
rs11002579	10	80258836	A	G	0.3366	-0.1316	0.02727	1.46201e-06	CD39+ activated CD4 regulatory T cell Absolute Count || id:ebi-a-GCST90001489	3405
rs202211780	10	97016742	G	A	0.0878	0.4192	0.04585	1.01906e-19	CD39+ activated CD4 regulatory T cell Absolute Count || id:ebi-a-GCST90001489	3405
rs4321083	13	84031916	A	G	0.2137	0.1497	0.03152	2.12398e-06	CD39+ activated CD4 regulatory T cell Absolute Count || id:ebi-a-GCST90001489	3405
rs4441121	13	19650584	G	A	0.3192	0.125	0.02703	3.85496e-06	CD39+ activated CD4 regulatory T cell Absolute Count || id:ebi-a-GCST90001489	3405
rs56197234	15	70222702	A	G	0.0115	0.5601	0.1188	2.536e-06	CD39+ activated CD4 regulatory T cell Absolute Count || id:ebi-a-GCST90001489	3405
rs289708	16	57038162	G	A	0.7573	0.1372	0.02962	3.77303e-06	CD39+ activated CD4 regulatory T cell Absolute Count || id:ebi-a-GCST90001489	3405
rs139917391	16	18152860	T	C	0.0004	2.666	0.5711	3.15697e-06	CD39+ activated CD4 regulatory T cell Absolute Count || id:ebi-a-GCST90001489	3405
rs618250	18	362116	T	C	0.0457	0.3109	0.06017	2.51299e-07	CD39+ activated CD4 regulatory T cell Absolute Count || id:ebi-a-GCST90001489	3405
rs4811602	20	36849088	A	G	0.4019	0.1348	0.02614	2.651e-07	CD39+ activated CD4 regulatory T cell Absolute Count || id:ebi-a-GCST90001489	3405
rs118006237	1	100480230	A	G	0.0007	1.942	0.4013	1.357e-06	CD39+ activated CD4 regulatory T cell %activated CD4 regulatory T cell || id:ebi-a-GCST90001490	3437
rs2171655	2	127229166	C	A	0.0508	0.3024	0.05716	1.297e-07	CD39+ activated CD4 regulatory T cell %activated CD4 regulatory T cell || id:ebi-a-GCST90001490	3437
rs12106894	3	127066325	C	A	0.1079	-0.1875	0.04072	4.30101e-06	CD39+ activated CD4 regulatory T cell %activated CD4 regulatory T cell || id:ebi-a-GCST90001490	3437
rs7681044	4	99477128	A	G	0.5692	-0.125	0.02547	9.69505e-07	CD39+ activated CD4 regulatory T cell %CD4 regulatory T cell || id:ebi-a-GCST90001491	3437
rs12648210	4	89266460	G	A	0.0145	-0.5101	0.1037	9.19094e-07	CD39+ activated CD4 regulatory T cell %CD4 regulatory T cell || id:ebi-a-GCST90001491	3437
rs62390650	6	1652500	A	G	0.23	-0.138	0.02908	2.14299e-06	CD39+ activated CD4 regulatory T cell %CD4 regulatory T cell || id:ebi-a-GCST90001491	3437
rs138483328	6	108484291	T	C	0.0141	0.4874	0.1054	3.86002e-06	CD39+ activated CD4 regulatory T cell %CD4 regulatory T cell || id:ebi-a-GCST90001491	3437
rs7035176	9	119577258	C	G	0.1759	0.1497	0.03193	2.834e-06	CD39+ activated CD4 regulatory T cell %CD4 regulatory T cell || id:ebi-a-GCST90001491	3437
rs72809762	10	97294154	T	C	0.0675	0.3615	0.05014	6.86278e-13	CD39+ activated CD4 regulatory T cell %CD4 regulatory T cell || id:ebi-a-GCST90001491	3437
rs12268044	10	98794615	T	C	0.3439	-0.1886	0.02672	2.04692e-12	CD39+ activated CD4 regulatory T cell %CD4 regulatory T cell || id:ebi-a-GCST90001491	3437
rs202211780	10	97016742	G	A	0.0877	0.4416	0.04511	2.45923e-22	CD39+ activated CD4 regulatory T cell %CD4 regulatory T cell || id:ebi-a-GCST90001491	3437
rs141018090	10	98169221	T	G	0.0528	0.4456	0.05532	1.07597e-15	CD39+ activated CD4 regulatory T cell %CD4 regulatory T cell || id:ebi-a-GCST90001491	3437
rs148430006	10	95923091	T	G	0.0227	0.4454	0.08835	4.86598e-07	CD39+ activated CD4 regulatory T cell %CD4 regulatory T cell || id:ebi-a-GCST90001491	3437
rs10882655	10	97474371	A	G	0.5319	-0.9139	0.02033	1e-200	CD39+ activated CD4 regulatory T cell %CD4 regulatory T cell || id:ebi-a-GCST90001491	3437
rs10882701	10	97741071	C	A	0.5141	-0.3538	0.02489	1.31613e-44	CD39+ activated CD4 regulatory T cell %CD4 regulatory T cell || id:ebi-a-GCST90001491	3437
rs148903835	10	108283818	A	G	0.0106	0.6005	0.1288	3.225e-06	CD39+ activated CD4 regulatory T cell %CD4 regulatory T cell || id:ebi-a-GCST90001491	3437
rs10786199	10	97069472	A	G	0.2888	-0.1864	0.02836	5.61177e-11	CD39+ activated CD4 regulatory T cell %CD4 regulatory T cell || id:ebi-a-GCST90001491	3437
rs117858605	12	81434565	G	A	0.0029	1.041	0.22	2.339e-06	CD39+ activated CD4 regulatory T cell %CD4 regulatory T cell || id:ebi-a-GCST90001491	3437
rs11579717	1	199999121	A	G	0.0044	-1.201	0.1934	5.94005e-10	Secreting CD4 regulatory T cell Absolute Count || id:ebi-a-GCST90001492	3405
rs138915779	1	190079170	A	C	0.0034	-1.455	0.2371	9.40091e-10	Secreting CD4 regulatory T cell Absolute Count || id:ebi-a-GCST90001492	3405
rs113435341	1	198151688	G	A	0.0032	-2.032	0.2282	8.6856e-19	Secreting CD4 regulatory T cell Absolute Count || id:ebi-a-GCST90001492	3405
rs76202906	1	113476831	A	C	0.0301	-0.3478	0.07473	3.37303e-06	Secreting CD4 regulatory T cell Absolute Count || id:ebi-a-GCST90001492	3405
rs138960714	4	123422719	C	A	0.0006	-2.391	0.5194	4.302e-06	Secreting CD4 regulatory T cell Absolute Count || id:ebi-a-GCST90001492	3405
rs114437347	4	86967620	C	G	0.0003	-3.936	0.8431	3.15297e-06	Secreting CD4 regulatory T cell Absolute Count || id:ebi-a-GCST90001492	3405
rs507492	6	109031005	C	G	0.007	0.694	0.1506	4.20901e-06	Secreting CD4 regulatory T cell Absolute Count || id:ebi-a-GCST90001492	3405
rs6942586	7	36530276	A	G	0.6416	-0.1271	0.02687	2.31798e-06	Secreting CD4 regulatory T cell Absolute Count || id:ebi-a-GCST90001492	3405
rs17717645	7	18003774	C	T	0.0267	0.3868	0.08192	2.43798e-06	Secreting CD4 regulatory T cell Absolute Count || id:ebi-a-GCST90001492	3405
rs61839660	10	6094697	T	C	0.0542	0.3436	0.05734	2.274e-09	Secreting CD4 regulatory T cell Absolute Count || id:ebi-a-GCST90001492	3405
rs75596315	12	122520112	T	C	0.0523	0.2636	0.05765	4.97199e-06	Secreting CD4 regulatory T cell Absolute Count || id:ebi-a-GCST90001492	3405
rs3184504	12	111884608	C	T	0.5289	-0.1297	0.0282	4.39805e-06	Secreting CD4 regulatory T cell Absolute Count || id:ebi-a-GCST90001492	3405
rs145600407	13	19280601	T	C	0.0206	-0.5134	0.1045	9.43409e-07	Secreting CD4 regulatory T cell Absolute Count || id:ebi-a-GCST90001492	3405
rs7162344	15	26030485	A	G	0.4314	-0.1209	0.02578	2.857e-06	Secreting CD4 regulatory T cell Absolute Count || id:ebi-a-GCST90001492	3405
rs153054	16	69446054	G	A	0.0019	1.442	0.3132	4.31698e-06	Secreting CD4 regulatory T cell Absolute Count || id:ebi-a-GCST90001492	3405
rs149951966	17	41137136	C	T	0.1035	0.2109	0.04394	1.65501e-06	Secreting CD4 regulatory T cell Absolute Count || id:ebi-a-GCST90001492	3405
rs11579717	1	199999121	A	G	0.0044	-1.776	0.1774	2.93022e-23	Secreting CD4 regulatory T cell %CD4 regulatory T cell || id:ebi-a-GCST90001493	3437
rs116794175	1	194010208	C	T	0.0042	-1.417	0.1841	1.78115e-14	Secreting CD4 regulatory T cell %CD4 regulatory T cell || id:ebi-a-GCST90001493	3437
rs187089343	1	182091538	C	A	0.0047	-0.8547	0.1809	2.38699e-06	Secreting CD4 regulatory T cell %CD4 regulatory T cell || id:ebi-a-GCST90001493	3437
rs11577174	1	230492271	T	C	0.0012	1.612	0.3412	2.38699e-06	Secreting CD4 regulatory T cell %CD4 regulatory T cell || id:ebi-a-GCST90001493	3437
rs34645541	1	195875605	A	C	0.0095	-0.6193	0.125	7.59994e-07	Secreting CD4 regulatory T cell %CD4 regulatory T cell || id:ebi-a-GCST90001493	3437
rs60220946	1	193505625	T	C	0.0212	-0.4131	0.08175	4.56499e-07	Secreting CD4 regulatory T cell %CD4 regulatory T cell || id:ebi-a-GCST90001493	3437
rs12744266	1	248047667	A	G	0.2979	0.1243	0.02583	1.547e-06	Secreting CD4 regulatory T cell %CD4 regulatory T cell || id:ebi-a-GCST90001493	3437
rs113435341	1	198151688	G	A	0.0032	-2.54	0.2093	3.13834e-33	Secreting CD4 regulatory T cell %CD4 regulatory T cell || id:ebi-a-GCST90001493	3437
rs75981740	1	5012020	G	A	0.0711	0.212	0.04589	3.97796e-06	Secreting CD4 regulatory T cell %CD4 regulatory T cell || id:ebi-a-GCST90001493	3437
rs17607399	2	41884212	T	C	0.1084	-0.2213	0.03894	1.43599e-08	Secreting CD4 regulatory T cell %CD4 regulatory T cell || id:ebi-a-GCST90001493	3437
rs413431	2	39176695	G	A	0.8154	0.2955	0.03106	3.30598e-21	Secreting CD4 regulatory T cell %CD4 regulatory T cell || id:ebi-a-GCST90001493	3437
rs6751481	2	38897810	C	T	0.4709	-0.2879	0.02374	3.53021e-33	Secreting CD4 regulatory T cell %CD4 regulatory T cell || id:ebi-a-GCST90001493	3437
rs62322628	4	122780838	T	C	0.0049	-0.814	0.1759	3.82798e-06	Secreting CD4 regulatory T cell %CD4 regulatory T cell || id:ebi-a-GCST90001493	3437
rs11739607	5	27694229	C	T	0.0214	-0.3801	0.08266	4.42497e-06	Secreting CD4 regulatory T cell %CD4 regulatory T cell || id:ebi-a-GCST90001493	3437
rs10059100	5	120100784	G	A	0.3224	0.1188	0.02585	4.48301e-06	Secreting CD4 regulatory T cell %CD4 regulatory T cell || id:ebi-a-GCST90001493	3437
rs273421	8	132542825	C	G	0.8356	0.1507	0.03147	1.75902e-06	Secreting CD4 regulatory T cell %CD4 regulatory T cell || id:ebi-a-GCST90001493	3437
rs79224901	8	3651438	C	G	0.0221	-0.4074	0.08352	1.118e-06	Secreting CD4 regulatory T cell %CD4 regulatory T cell || id:ebi-a-GCST90001493	3437
rs7893324	10	6111075	C	T	0.1562	0.1629	0.03354	1.24799e-06	Secreting CD4 regulatory T cell %CD4 regulatory T cell || id:ebi-a-GCST90001493	3437
rs562562	18	24263725	A	G	0.3714	0.1197	0.02486	1.54e-06	Secreting CD4 regulatory T cell %CD4 regulatory T cell || id:ebi-a-GCST90001493	3437
rs369976766	22	28835840	A	T	0.0035	-1.008	0.2144	2.66999e-06	Secreting CD4 regulatory T cell %CD4 regulatory T cell || id:ebi-a-GCST90001493	3437
rs113435341	1	198151688	G	A	0.0032	-2.18	0.2206	9.94489e-23	Secreting CD4 regulatory T cell %CD4+ T cell || id:ebi-a-GCST90001494	3437
rs143290109	1	103543193	T	C	0.0007	-2.172	0.472	4.345e-06	Secreting CD4 regulatory T cell %CD4+ T cell || id:ebi-a-GCST90001494	3437
rs10925924	1	239767145	G	T	0.8829	-0.1919	0.03875	7.73108e-07	Secreting CD4 regulatory T cell %CD4+ T cell || id:ebi-a-GCST90001494	3437
rs35378667	1	205001095	C	T	0.0141	-0.5212	0.1035	5.03501e-07	Secreting CD4 regulatory T cell %CD4+ T cell || id:ebi-a-GCST90001494	3437
rs11579717	1	199999121	A	G	0.0044	-1.625	0.1865	4.48642e-18	Secreting CD4 regulatory T cell %CD4+ T cell || id:ebi-a-GCST90001494	3437
rs138915779	1	190079170	A	C	0.0035	-1.514	0.2286	4.10677e-11	Secreting CD4 regulatory T cell %CD4+ T cell || id:ebi-a-GCST90001494	3437
rs12712610	2	38897249	G	A	0.2975	-0.1818	0.02763	5.43e-11	Secreting CD4 regulatory T cell %CD4+ T cell || id:ebi-a-GCST90001494	3437
rs11124653	2	39112166	A	C	0.5911	0.1191	0.026	4.79104e-06	Secreting CD4 regulatory T cell %CD4+ T cell || id:ebi-a-GCST90001494	3437
rs6438325	3	116384674	C	A	0.8749	-0.1809	0.03737	1.354e-06	Secreting CD4 regulatory T cell %CD4+ T cell || id:ebi-a-GCST90001494	3437
rs9838548	3	126747367	C	T	0.3134	0.1279	0.0271	2.44298e-06	Secreting CD4 regulatory T cell %CD4+ T cell || id:ebi-a-GCST90001494	3437
rs7651919	3	4597367	T	G	0.4529	-0.1153	0.02483	3.597e-06	Secreting CD4 regulatory T cell %CD4+ T cell || id:ebi-a-GCST90001494	3437
rs2668533	4	54555201	T	C	0.7284	-0.1342	0.02819	1.996e-06	Secreting CD4 regulatory T cell %CD4+ T cell || id:ebi-a-GCST90001494	3437
rs114437347	4	86967620	C	G	0.0003	-3.842	0.8142	2.46099e-06	Secreting CD4 regulatory T cell %CD4+ T cell || id:ebi-a-GCST90001494	3437
rs138960714	4	123422719	C	A	0.0006	-2.942	0.5018	4.97096e-09	Secreting CD4 regulatory T cell %CD4+ T cell || id:ebi-a-GCST90001494	3437
rs74830391	7	37427289	T	C	0.1525	0.1999	0.03637	4.14e-08	Secreting CD4 regulatory T cell %CD4+ T cell || id:ebi-a-GCST90001494	3437
rs6602392	10	6078079	A	C	0.1155	0.2126	0.03897	5.28397e-08	Secreting CD4 regulatory T cell %CD4+ T cell || id:ebi-a-GCST90001494	3437
rs7893324	10	6111075	C	T	0.1562	0.2816	0.03509	1.3671e-15	Secreting CD4 regulatory T cell %CD4+ T cell || id:ebi-a-GCST90001494	3437
rs10905879	10	6177083	T	C	0.1286	0.1904	0.03733	3.54601e-07	Secreting CD4 regulatory T cell %CD4+ T cell || id:ebi-a-GCST90001494	3437
rs149375589	11	67333370	G	T	0.0004	-2.824	0.5982	2.452e-06	Secreting CD4 regulatory T cell %CD4+ T cell || id:ebi-a-GCST90001494	3437
rs138514398	11	66788802	G	T		-9.098	1.973	4.17004e-06	Secreting CD4 regulatory T cell %CD4+ T cell || id:ebi-a-GCST90001494	3437
rs114114791	1	25840181	G	A	0.0304	0.3538	0.07416	1.91399e-06	CD39+ secreting CD4 regulatory T cell Absolute Count || id:ebi-a-GCST90001495	3405
rs76464802	7	67769786	A	G	0.015	-0.4852	0.1056	4.47497e-06	CD39+ secreting CD4 regulatory T cell Absolute Count || id:ebi-a-GCST90001495	3405
rs78027772	7	126248228	A	G	0.0846	0.2257	0.04708	1.71301e-06	CD39+ secreting CD4 regulatory T cell Absolute Count || id:ebi-a-GCST90001495	3405
rs150315125	8	10090715	T	A	0.0295	-0.4106	0.08147	4.89103e-07	CD39+ secreting CD4 regulatory T cell Absolute Count || id:ebi-a-GCST90001495	3405
rs74791100	9	86052403	C	T	0.0123	0.5538	0.1185	3.09001e-06	CD39+ secreting CD4 regulatory T cell Absolute Count || id:ebi-a-GCST90001495	3405
rs10786199	10	97069472	A	G	0.2894	-0.1932	0.02906	3.39313e-11	CD39+ secreting CD4 regulatory T cell Absolute Count || id:ebi-a-GCST90001495	3405
rs11598645	10	68351521	C	T	0.011	-0.6337	0.1381	4.64098e-06	CD39+ secreting CD4 regulatory T cell Absolute Count || id:ebi-a-GCST90001495	3405
rs72809762	10	97294154	T	C	0.0675	0.4322	0.05126	4.98196e-17	CD39+ secreting CD4 regulatory T cell Absolute Count || id:ebi-a-GCST90001495	3405
rs10882655	10	97474371	A	G	0.532	-0.9594	0.02046	1e-200	CD39+ secreting CD4 regulatory T cell Absolute Count || id:ebi-a-GCST90001495	3405
rs11188757	10	98205222	C	A	0.2213	-0.2549	0.03174	1.32801e-15	CD39+ secreting CD4 regulatory T cell Absolute Count || id:ebi-a-GCST90001495	3405
rs202211780	10	97016742	G	A	0.0878	0.4715	0.04614	3.67621e-24	CD39+ secreting CD4 regulatory T cell Absolute Count || id:ebi-a-GCST90001495	3405
rs10882701	10	97741071	C	A	0.514	-0.4069	0.02528	3.19374e-56	CD39+ secreting CD4 regulatory T cell Absolute Count || id:ebi-a-GCST90001495	3405
rs149951966	17	41137136	C	T	0.1035	0.2069	0.04388	2.50599e-06	CD39+ secreting CD4 regulatory T cell Absolute Count || id:ebi-a-GCST90001495	3405
rs11655883	17	75234757	G	A	0.2902	0.1294	0.02794	3.74197e-06	CD39+ secreting CD4 regulatory T cell Absolute Count || id:ebi-a-GCST90001495	3405
rs6005121	22	27065117	G	A	0.8974	-0.2011	0.04185	1.62301e-06	CD39+ secreting CD4 regulatory T cell Absolute Count || id:ebi-a-GCST90001495	3405
rs282011	1	91858207	T	C	0.3099	0.1314	0.02772	2.23301e-06	CD39+ secreting CD4 regulatory T cell %secreting CD4 regulatory T cell || id:ebi-a-GCST90001496	3437
rs147911368	1	97319841	C	T	0.0063	-0.772	0.1665	3.68697e-06	CD39+ secreting CD4 regulatory T cell %secreting CD4 regulatory T cell || id:ebi-a-GCST90001496	3437
rs118006237	1	100480230	A	G	0.0007	1.987	0.4127	1.536e-06	CD39+ secreting CD4 regulatory T cell %secreting CD4 regulatory T cell || id:ebi-a-GCST90001496	3437
rs78458369	2	74164120	T	A	0.0007	2.399	0.5036	1.97601e-06	CD39+ secreting CD4 regulatory T cell %secreting CD4 regulatory T cell || id:ebi-a-GCST90001496	3437
rs2171655	2	127229166	C	A	0.0508	0.2773	0.05858	2.298e-06	CD39+ secreting CD4 regulatory T cell %secreting CD4 regulatory T cell || id:ebi-a-GCST90001496	3437
rs73037918	3	10923961	C	T	0.0451	-0.2836	0.06115	3.64998e-06	CD39+ secreting CD4 regulatory T cell %secreting CD4 regulatory T cell || id:ebi-a-GCST90001496	3437
rs74346764	3	145230069	A	G	0.0102	-0.5969	0.1285	3.52704e-06	CD39+ secreting CD4 regulatory T cell %secreting CD4 regulatory T cell || id:ebi-a-GCST90001496	3437
rs35796547	3	74432399	G	A	0.3363	0.131	0.02663	9.06192e-07	CD39+ secreting CD4 regulatory T cell %secreting CD4 regulatory T cell || id:ebi-a-GCST90001496	3437
rs17571942	5	29581038	G	T	0.0015	1.778	0.3703	1.65501e-06	CD39+ secreting CD4 regulatory T cell %secreting CD4 regulatory T cell || id:ebi-a-GCST90001496	3437
rs114844216	10	98158952	C	T	0.0464	0.6107	0.06018	7.34683e-24	CD39+ secreting CD4 regulatory T cell %secreting CD4 regulatory T cell || id:ebi-a-GCST90001496	3437
rs4918960	10	97472570	A	T	0.4862	-0.9412	0.02027	1e-200	CD39+ secreting CD4 regulatory T cell %secreting CD4 regulatory T cell || id:ebi-a-GCST90001496	3437
rs146426185	10	99452494	C	A	0.0634	-0.3085	0.05356	9.16896e-09	CD39+ secreting CD4 regulatory T cell %secreting CD4 regulatory T cell || id:ebi-a-GCST90001496	3437
rs7910217	10	96999873	A	G	0.2076	0.2459	0.03182	1.422e-14	CD39+ secreting CD4 regulatory T cell %secreting CD4 regulatory T cell || id:ebi-a-GCST90001496	3437
rs147121076	10	95924521	G	T	0.0262	0.4594	0.08235	2.625e-08	CD39+ secreting CD4 regulatory T cell %secreting CD4 regulatory T cell || id:ebi-a-GCST90001496	3437
rs117200502	10	97070990	T	C	0.1114	0.4259	0.0408	3.91291e-25	CD39+ secreting CD4 regulatory T cell %secreting CD4 regulatory T cell || id:ebi-a-GCST90001496	3437
rs145557266	10	95850055	G	A	0.0211	0.7359	0.09042	5.55392e-16	CD39+ secreting CD4 regulatory T cell %secreting CD4 regulatory T cell || id:ebi-a-GCST90001496	3437
rs10882701	10	97741071	C	A	0.5141	-0.4034	0.02502	2.03704e-56	CD39+ secreting CD4 regulatory T cell %secreting CD4 regulatory T cell || id:ebi-a-GCST90001496	3437
rs11188950	10	98619863	G	T	0.0167	0.4852	0.103	2.59298e-06	CD39+ secreting CD4 regulatory T cell %secreting CD4 regulatory T cell || id:ebi-a-GCST90001496	3437
rs118111902	11	19624351	C	G	0.0179	0.466	0.09549	1.11199e-06	CD39+ secreting CD4 regulatory T cell %secreting CD4 regulatory T cell || id:ebi-a-GCST90001496	3437
rs111461378	20	15575550	C	T	0.0028	-1.107	0.2386	3.58699e-06	CD39+ secreting CD4 regulatory T cell %secreting CD4 regulatory T cell || id:ebi-a-GCST90001496	3437
rs5769126	22	47135205	C	A	0.6062	0.1277	0.02586	8.342e-07	CD39+ secreting CD4 regulatory T cell %secreting CD4 regulatory T cell || id:ebi-a-GCST90001496	3437
rs118006237	1	100480230	A	G	0.0007	1.921	0.4076	2.53e-06	CD39+ secreting CD4 regulatory T cell %CD4 regulatory T cell || id:ebi-a-GCST90001497	3437
rs78458369	2	74164120	T	A	0.0007	2.598	0.497	1.81001e-07	CD39+ secreting CD4 regulatory T cell %CD4 regulatory T cell || id:ebi-a-GCST90001497	3437
rs17571942	5	29581038	G	T	0.0015	1.694	0.3658	3.77103e-06	CD39+ secreting CD4 regulatory T cell %CD4 regulatory T cell || id:ebi-a-GCST90001497	3437
rs2569847	6	1651973	G	A	0.2277	-0.1367	0.02941	3.46298e-06	CD39+ secreting CD4 regulatory T cell %CD4 regulatory T cell || id:ebi-a-GCST90001497	3437
rs115364130	7	83238053	A	G	0.0223	-0.4063	0.0857	2.21299e-06	CD39+ secreting CD4 regulatory T cell %CD4 regulatory T cell || id:ebi-a-GCST90001497	3437
rs59428330	9	138051433	T	C	0.0425	0.2934	0.06107	1.62002e-06	CD39+ secreting CD4 regulatory T cell %CD4 regulatory T cell || id:ebi-a-GCST90001497	3437
rs114844216	10	98158952	C	T	0.0464	0.5653	0.05954	3.98474e-21	CD39+ secreting CD4 regulatory T cell %CD4 regulatory T cell || id:ebi-a-GCST90001497	3437
rs117200502	10	97070990	T	C	0.1114	0.4056	0.04033	1.79887e-23	CD39+ secreting CD4 regulatory T cell %CD4 regulatory T cell || id:ebi-a-GCST90001497	3437
rs61873892	10	100118038	T	C	0.0294	-0.3713	0.07665	1.327e-06	CD39+ secreting CD4 regulatory T cell %CD4 regulatory T cell || id:ebi-a-GCST90001497	3437
rs145557266	10	95850055	G	A	0.0211	0.7299	0.08928	4.09261e-16	CD39+ secreting CD4 regulatory T cell %CD4 regulatory T cell || id:ebi-a-GCST90001497	3437
rs7910217	10	96999873	A	G	0.2076	0.2468	0.03142	5.27959e-15	CD39+ secreting CD4 regulatory T cell %CD4 regulatory T cell || id:ebi-a-GCST90001497	3437
rs10882701	10	97741071	C	A	0.5141	-0.3962	0.02472	8.02786e-56	CD39+ secreting CD4 regulatory T cell %CD4 regulatory T cell || id:ebi-a-GCST90001497	3437
rs146426185	10	99452494	C	A	0.0634	-0.3048	0.05289	8.95509e-09	CD39+ secreting CD4 regulatory T cell %CD4 regulatory T cell || id:ebi-a-GCST90001497	3437
rs7080854	10	116367153	A	G	0.684	-0.1276	0.02732	3.12702e-06	CD39+ secreting CD4 regulatory T cell %CD4 regulatory T cell || id:ebi-a-GCST90001497	3437
rs147121076	10	95924521	G	T	0.0262	0.4681	0.0813	9.29009e-09	CD39+ secreting CD4 regulatory T cell %CD4 regulatory T cell || id:ebi-a-GCST90001497	3437
rs4918960	10	97472570	A	T	0.4862	-0.9321	0.01998	1e-200	CD39+ secreting CD4 regulatory T cell %CD4 regulatory T cell || id:ebi-a-GCST90001497	3437
rs144404462	1	198005348	A	G	0.0211	0.4385	0.08542	3.01301e-07	Activated & resting CD4 regulatory T cell Absolute Count || id:ebi-a-GCST90001498	3405
rs6751481	2	38897810	C	T	0.4699	0.1507	0.02494	1.67598e-09	Activated & resting CD4 regulatory T cell Absolute Count || id:ebi-a-GCST90001498	3405
rs408686	2	39177320	A	C	0.814	-0.164	0.03249	4.71303e-07	Activated & resting CD4 regulatory T cell Absolute Count || id:ebi-a-GCST90001498	3405
rs146746694	6	155566192	A	G	0.0101	0.5612	0.121	3.65401e-06	Activated & resting CD4 regulatory T cell Absolute Count || id:ebi-a-GCST90001498	3405
rs9272226	6	32602396	T	C	0.7159	0.1634	0.03206	3.67003e-07	Activated & resting CD4 regulatory T cell Absolute Count || id:ebi-a-GCST90001498	3405
rs147199078	7	80542211	C	T	0.0295	0.354	0.07196	9.08908e-07	Activated & resting CD4 regulatory T cell Absolute Count || id:ebi-a-GCST90001498	3405
rs2108908	7	152112789	C	A	0.0803	0.2204	0.04371	4.854e-07	Activated & resting CD4 regulatory T cell Absolute Count || id:ebi-a-GCST90001498	3405
rs182630194	7	71331239	A	G	0.0013	1.629	0.3406	1.81602e-06	Activated & resting CD4 regulatory T cell Absolute Count || id:ebi-a-GCST90001498	3405
rs1819445	9	96772051	A	G	0.1427	-0.1624	0.03527	4.32096e-06	Activated & resting CD4 regulatory T cell Absolute Count || id:ebi-a-GCST90001498	3405
rs12049737	10	2614502	A	G	0.0548	0.2633	0.05471	1.548e-06	Activated & resting CD4 regulatory T cell Absolute Count || id:ebi-a-GCST90001498	3405
rs78409263	11	79202514	C	G	0.122	-0.2043	0.03808	8.70803e-08	Activated & resting CD4 regulatory T cell Absolute Count || id:ebi-a-GCST90001498	3405
rs11850806	14	78669137	G	T	0.0085	-0.6053	0.1301	3.40596e-06	Activated & resting CD4 regulatory T cell Absolute Count || id:ebi-a-GCST90001498	3405
rs9709738	18	60137303	C	G	0.7336	-0.1302	0.02762	2.53898e-06	Activated & resting CD4 regulatory T cell Absolute Count || id:ebi-a-GCST90001498	3405
rs79684619	18	64907349	G	A	0.0442	0.2954	0.0592	6.32893e-07	Activated & resting CD4 regulatory T cell Absolute Count || id:ebi-a-GCST90001498	3405
rs6074425	20	1295889	A	G	0.2535	0.1319	0.02841	3.57503e-06	Activated & resting CD4 regulatory T cell Absolute Count || id:ebi-a-GCST90001498	3405
rs6587385	1	248047256	C	T	0.7012	0.125	0.02593	1.48201e-06	Activated & resting CD4 regulatory T cell %CD4 regulatory T cell || id:ebi-a-GCST90001499	3437
rs113435341	1	198151688	G	A	0.0032	2.569	0.2103	1.27909e-33	Activated & resting CD4 regulatory T cell %CD4 regulatory T cell || id:ebi-a-GCST90001499	3437
rs11579717	1	199999121	A	G	0.0044	1.815	0.1783	5.32721e-24	Activated & resting CD4 regulatory T cell %CD4 regulatory T cell || id:ebi-a-GCST90001499	3437
rs187089343	1	182091538	C	A	0.0047	0.8446	0.1818	3.52598e-06	Activated & resting CD4 regulatory T cell %CD4 regulatory T cell || id:ebi-a-GCST90001499	3437
rs11577174	1	230492271	T	C	0.0012	-1.588	0.343	3.78303e-06	Activated & resting CD4 regulatory T cell %CD4 regulatory T cell || id:ebi-a-GCST90001499	3437
rs60220946	1	193505625	T	C	0.0212	0.4221	0.08216	2.94897e-07	Activated & resting CD4 regulatory T cell %CD4 regulatory T cell || id:ebi-a-GCST90001499	3437
rs116794175	1	194010208	C	T	0.0042	1.427	0.1851	1.61696e-14	Activated & resting CD4 regulatory T cell %CD4 regulatory T cell || id:ebi-a-GCST90001499	3437
rs34645541	1	195875605	A	C	0.0095	0.6092	0.1257	1.302e-06	Activated & resting CD4 regulatory T cell %CD4 regulatory T cell || id:ebi-a-GCST90001499	3437
rs75981740	1	5012020	G	A	0.0711	-0.2161	0.04613	2.91602e-06	Activated & resting CD4 regulatory T cell %CD4 regulatory T cell || id:ebi-a-GCST90001499	3437
rs6751481	2	38897810	C	T	0.4709	0.2886	0.02387	5.48656e-33	Activated & resting CD4 regulatory T cell %CD4 regulatory T cell || id:ebi-a-GCST90001499	3437
rs17607399	2	41884212	T	C	0.1084	0.218	0.03915	2.76599e-08	Activated & resting CD4 regulatory T cell %CD4 regulatory T cell || id:ebi-a-GCST90001499	3437
rs413431	2	39176695	G	A	0.8154	-0.2936	0.03123	9.54333e-21	Activated & resting CD4 regulatory T cell %CD4 regulatory T cell || id:ebi-a-GCST90001499	3437
rs273421	8	132542825	C	G	0.8356	-0.1485	0.03164	2.81501e-06	Activated & resting CD4 regulatory T cell %CD4 regulatory T cell || id:ebi-a-GCST90001499	3437
rs79224901	8	3651438	C	G	0.0221	0.4155	0.08395	7.79704e-07	Activated & resting CD4 regulatory T cell %CD4 regulatory T cell || id:ebi-a-GCST90001499	3437
rs7893324	10	6111075	C	T	0.1562	-0.1646	0.03371	1.088e-06	Activated & resting CD4 regulatory T cell %CD4 regulatory T cell || id:ebi-a-GCST90001499	3437
rs562562	18	24263725	A	G	0.3714	-0.1195	0.02499	1.81001e-06	Activated & resting CD4 regulatory T cell %CD4 regulatory T cell || id:ebi-a-GCST90001499	3437
rs369976766	22	28835840	A	T	0.0035	1.032	0.2155	1.74201e-06	Activated & resting CD4 regulatory T cell %CD4 regulatory T cell || id:ebi-a-GCST90001499	3437
rs76882749	1	54532130	C	T	0.0141	-0.4841	0.1026	2.47799e-06	Activated & resting CD4 regulatory T cell %CD4+ T cell || id:ebi-a-GCST90001500	3437
rs17583875	1	197924770	A	G	0.0029	1.827	0.2239	4.63981e-16	Activated & resting CD4 regulatory T cell %CD4+ T cell || id:ebi-a-GCST90001500	3437
rs116794175	1	194010208	C	T	0.0042	0.9735	0.1912	3.74602e-07	Activated & resting CD4 regulatory T cell %CD4+ T cell || id:ebi-a-GCST90001500	3437
rs190023756	1	199471227	A	G	0.01	0.5843	0.1214	1.55801e-06	Activated & resting CD4 regulatory T cell %CD4+ T cell || id:ebi-a-GCST90001500	3437
rs572410764	1	239509035	T	A	0.0013	1.603	0.3391	2.36903e-06	Activated & resting CD4 regulatory T cell %CD4+ T cell || id:ebi-a-GCST90001500	3437
rs6751481	2	38897810	C	T	0.4709	0.2086	0.02476	5.19278e-17	Activated & resting CD4 regulatory T cell %CD4+ T cell || id:ebi-a-GCST90001500	3437
rs408686	2	39177320	A	C	0.8142	-0.2228	0.03216	5.06058e-12	Activated & resting CD4 regulatory T cell %CD4+ T cell || id:ebi-a-GCST90001500	3437
rs6724848	2	38678651	A	G	0.4951	0.1161	0.02487	3.145e-06	Activated & resting CD4 regulatory T cell %CD4+ T cell || id:ebi-a-GCST90001500	3437
rs73009664	3	2721613	C	T	0.0147	0.459	0.1	4.60098e-06	Activated & resting CD4 regulatory T cell %CD4+ T cell || id:ebi-a-GCST90001500	3437
rs62285107	4	1731279	T	C	0.0912	-0.1995	0.04243	2.666e-06	Activated & resting CD4 regulatory T cell %CD4+ T cell || id:ebi-a-GCST90001500	3437
rs17780836	5	58622934	T	C	0.1529	0.1562	0.03414	4.93003e-06	Activated & resting CD4 regulatory T cell %CD4+ T cell || id:ebi-a-GCST90001500	3437
rs62390348	6	14892248	T	C	0.0106	0.5437	0.1176	3.89798e-06	Activated & resting CD4 regulatory T cell %CD4+ T cell || id:ebi-a-GCST90001500	3437
rs9269074	6	32440792	A	G	0.0177	0.4712	0.1027	4.63596e-06	Activated & resting CD4 regulatory T cell %CD4+ T cell || id:ebi-a-GCST90001500	3437
rs56090633	7	51393519	T	A	0.4773	-0.1155	0.02511	4.36305e-06	Activated & resting CD4 regulatory T cell %CD4+ T cell || id:ebi-a-GCST90001500	3437
rs76225340	8	3654985	T	G	0.022	0.3934	0.08591	4.81804e-06	Activated & resting CD4 regulatory T cell %CD4+ T cell || id:ebi-a-GCST90001500	3437
rs145165211	8	21371903	A	G	0.0167	-0.5131	0.1022	5.38505e-07	Activated & resting CD4 regulatory T cell %CD4+ T cell || id:ebi-a-GCST90001500	3437
rs514150	10	8084573	C	T	0.6045	-0.1167	0.02507	3.37404e-06	Activated & resting CD4 regulatory T cell %CD4+ T cell || id:ebi-a-GCST90001500	3437
rs1247730	11	79922768	T	C	0.2232	0.1384	0.02948	2.79299e-06	Activated & resting CD4 regulatory T cell %CD4+ T cell || id:ebi-a-GCST90001500	3437
rs61924635	12	25650645	C	T	0.0055	0.7724	0.1664	3.59302e-06	Activated & resting CD4 regulatory T cell %CD4+ T cell || id:ebi-a-GCST90001500	3437
rs77071786	12	23501010	C	G	0.0598	-0.2529	0.05283	1.75902e-06	Activated & resting CD4 regulatory T cell %CD4+ T cell || id:ebi-a-GCST90001500	3437
rs370689709	13	67699975	A	G	0.0081	0.726	0.1559	3.31597e-06	Activated & resting CD4 regulatory T cell %CD4+ T cell || id:ebi-a-GCST90001500	3437
rs113376235	16	75514711	A	C	0.0278	0.352	0.07659	4.454e-06	Activated & resting CD4 regulatory T cell %CD4+ T cell || id:ebi-a-GCST90001500	3437
rs461709	19	47666711	A	G	0.2789	-0.1276	0.02704	2.46598e-06	Activated & resting CD4 regulatory T cell %CD4+ T cell || id:ebi-a-GCST90001500	3437
rs11579717	1	199999121	A	G	0.0044	-1.179	0.1933	1.17501e-09	Activated & secreting CD4 regulatory T cell Absolute Count || id:ebi-a-GCST90001501	3405
rs113435341	1	198151688	G	A	0.0032	-2.018	0.2282	1.46791e-18	Activated & secreting CD4 regulatory T cell Absolute Count || id:ebi-a-GCST90001501	3405
rs76202906	1	113476831	A	C	0.0301	-0.3574	0.07469	1.77701e-06	Activated & secreting CD4 regulatory T cell Absolute Count || id:ebi-a-GCST90001501	3405
rs138915779	1	190079170	A	C	0.0034	-1.518	0.2369	1.67302e-10	Activated & secreting CD4 regulatory T cell Absolute Count || id:ebi-a-GCST90001501	3405
rs138960714	4	123422719	C	A	0.0006	-2.389	0.5191	4.35502e-06	Activated & secreting CD4 regulatory T cell Absolute Count || id:ebi-a-GCST90001501	3405
rs114437347	4	86967620	C	G	0.0003	-3.873	0.8428	4.46797e-06	Activated & secreting CD4 regulatory T cell Absolute Count || id:ebi-a-GCST90001501	3405
rs75280379	6	121512597	C	T	0.0022	1.467	0.3044	1.501e-06	Activated & secreting CD4 regulatory T cell Absolute Count || id:ebi-a-GCST90001501	3405
rs1268153	6	109035696	A	G	0.0053	0.8482	0.1738	1.11199e-06	Activated & secreting CD4 regulatory T cell Absolute Count || id:ebi-a-GCST90001501	3405
rs17717645	7	18003774	C	T	0.0267	0.3923	0.08188	1.72699e-06	Activated & secreting CD4 regulatory T cell Absolute Count || id:ebi-a-GCST90001501	3405
rs61839660	10	6094697	T	C	0.0542	0.3316	0.05733	7.93305e-09	Activated & secreting CD4 regulatory T cell Absolute Count || id:ebi-a-GCST90001501	3405
rs75596315	12	122520112	T	C	0.0523	0.2653	0.05762	4.28499e-06	Activated & secreting CD4 regulatory T cell Absolute Count || id:ebi-a-GCST90001501	3405
rs145600407	13	19280601	T	C	0.0206	-0.5371	0.1044	2.85299e-07	Activated & secreting CD4 regulatory T cell Absolute Count || id:ebi-a-GCST90001501	3405
rs7162344	15	26030485	A	G	0.4314	-0.1207	0.02577	2.90703e-06	Activated & secreting CD4 regulatory T cell Absolute Count || id:ebi-a-GCST90001501	3405
rs147638541	17	66206097	G	A	0.0018	-1.375	0.2938	2.95101e-06	Activated & secreting CD4 regulatory T cell Absolute Count || id:ebi-a-GCST90001501	3405
rs149951966	17	41137136	C	T	0.1035	0.2078	0.04392	2.33297e-06	Activated & secreting CD4 regulatory T cell Absolute Count || id:ebi-a-GCST90001501	3405
rs61828007	1	203502968	G	A	0.0289	-0.356	0.06849	2.12701e-07	Activated & secreting CD4 regulatory T cell %CD4 regulatory T cell || id:ebi-a-GCST90001502	3437
rs11579717	1	199999121	A	G	0.0044	-1.821	0.1663	1.86896e-27	Activated & secreting CD4 regulatory T cell %CD4 regulatory T cell || id:ebi-a-GCST90001502	3437
rs138915779	1	190079170	A	C	0.0035	-1.784	0.2042	3.69828e-18	Activated & secreting CD4 regulatory T cell %CD4 regulatory T cell || id:ebi-a-GCST90001502	3437
rs60220946	1	193505625	T	C	0.0212	-0.4053	0.07676	1.367e-07	Activated & secreting CD4 regulatory T cell %CD4 regulatory T cell || id:ebi-a-GCST90001502	3437
rs150956189	1	214625781	C	T	0.0003	-2.624	0.5683	4.01597e-06	Activated & secreting CD4 regulatory T cell %CD4 regulatory T cell || id:ebi-a-GCST90001502	3437
rs146899923	1	195919849	C	T	0.0089	-0.7496	0.1241	1.67799e-09	Activated & secreting CD4 regulatory T cell %CD4 regulatory T cell || id:ebi-a-GCST90001502	3437
rs187089343	1	182091538	C	A	0.0047	-0.9956	0.1693	4.52397e-09	Activated & secreting CD4 regulatory T cell %CD4 regulatory T cell || id:ebi-a-GCST90001502	3437
rs113435341	1	198151688	G	A	0.0032	-2.621	0.1957	6.32995e-40	Activated & secreting CD4 regulatory T cell %CD4 regulatory T cell || id:ebi-a-GCST90001502	3437
rs3917863	1	169592401	A	G	0.016	-0.4303	0.09161	2.74303e-06	Activated & secreting CD4 regulatory T cell %CD4 regulatory T cell || id:ebi-a-GCST90001502	3437
rs7530076	1	195825276	A	G	0.9748	0.4611	0.07373	4.49904e-10	Activated & secreting CD4 regulatory T cell %CD4 regulatory T cell || id:ebi-a-GCST90001502	3437
rs13000564	2	41596014	C	T	0.2959	0.1141	0.02487	4.61604e-06	Activated & secreting CD4 regulatory T cell %CD4 regulatory T cell || id:ebi-a-GCST90001502	3437
rs413431	2	39176695	G	A	0.8154	0.2748	0.0293	1.16305e-20	Activated & secreting CD4 regulatory T cell %CD4 regulatory T cell || id:ebi-a-GCST90001502	3437
rs112553628	2	38077329	G	A	0.0352	-0.2867	0.0606	2.31499e-06	Activated & secreting CD4 regulatory T cell %CD4 regulatory T cell || id:ebi-a-GCST90001502	3437
rs17607399	2	41884212	T	C	0.1084	-0.2077	0.03673	1.7e-08	Activated & secreting CD4 regulatory T cell %CD4 regulatory T cell || id:ebi-a-GCST90001502	3437
rs6751481	2	38897810	C	T	0.4709	-0.2903	0.02227	6.28782e-38	Activated & secreting CD4 regulatory T cell %CD4 regulatory T cell || id:ebi-a-GCST90001502	3437
rs138960714	4	123422719	C	A	0.0006	-2.124	0.451	2.585e-06	Activated & secreting CD4 regulatory T cell %CD4 regulatory T cell || id:ebi-a-GCST90001502	3437
rs10059100	5	120100784	G	A	0.3224	0.1214	0.02435	6.51493e-07	Activated & secreting CD4 regulatory T cell %CD4 regulatory T cell || id:ebi-a-GCST90001502	3437
rs9274712	6	32637298	T	C	0.3326	0.1731	0.03457	5.80898e-07	Activated & secreting CD4 regulatory T cell %CD4 regulatory T cell || id:ebi-a-GCST90001502	3437
rs192123974	11	13923816	T	C	0.0016	-1.546	0.3144	9.19009e-07	Activated & secreting CD4 regulatory T cell %CD4 regulatory T cell || id:ebi-a-GCST90001502	3437
rs145406940	12	23093493	A	G	0.001	1.967	0.4233	3.51196e-06	Activated & secreting CD4 regulatory T cell %CD4 regulatory T cell || id:ebi-a-GCST90001502	3437
rs116850494	13	60389778	A	G	0.0145	-0.4419	0.09434	2.91998e-06	Activated & secreting CD4 regulatory T cell %CD4 regulatory T cell || id:ebi-a-GCST90001502	3437
rs113000944	20	48836592	T	C	0.063	-0.2336	0.04699	6.944e-07	Activated & secreting CD4 regulatory T cell %CD4 regulatory T cell || id:ebi-a-GCST90001502	3437
rs11579717	1	199999121	A	G	0.0044	-1.573	0.1855	3.3512e-17	Activated & secreting CD4 regulatory T cell %CD4+ T cell || id:ebi-a-GCST90001503	3437
rs10925924	1	239767145	G	T	0.8829	-0.1944	0.03852	4.76903e-07	Activated & secreting CD4 regulatory T cell %CD4+ T cell || id:ebi-a-GCST90001503	3437
rs138915779	1	190079170	A	C	0.0035	-1.565	0.2272	6.75461e-12	Activated & secreting CD4 regulatory T cell %CD4+ T cell || id:ebi-a-GCST90001503	3437
rs113435341	1	198151688	G	A	0.0032	-2.11	0.2195	1.30707e-21	Activated & secreting CD4 regulatory T cell %CD4+ T cell || id:ebi-a-GCST90001503	3437
rs35378667	1	205001095	C	T	0.0141	-0.5302	0.1029	2.717e-07	Activated & secreting CD4 regulatory T cell %CD4+ T cell || id:ebi-a-GCST90001503	3437
rs12712610	2	38897249	G	A	0.2975	-0.1572	0.02752	1.20601e-08	Activated & secreting CD4 regulatory T cell %CD4+ T cell || id:ebi-a-GCST90001503	3437
rs73155096	3	149610852	G	C	0.0063	-0.7413	0.1601	3.77103e-06	Activated & secreting CD4 regulatory T cell %CD4+ T cell || id:ebi-a-GCST90001503	3437
rs6438325	3	116384674	C	A	0.8749	-0.1805	0.03716	1.232e-06	Activated & secreting CD4 regulatory T cell %CD4+ T cell || id:ebi-a-GCST90001503	3437
rs114437347	4	86967620	C	G	0.0003	-3.73	0.8097	4.23097e-06	Activated & secreting CD4 regulatory T cell %CD4+ T cell || id:ebi-a-GCST90001503	3437
rs186715000	4	1589324	G	A	0.0006	-2.136	0.466	4.75094e-06	Activated & secreting CD4 regulatory T cell %CD4+ T cell || id:ebi-a-GCST90001503	3437
rs2668533	4	54555201	T	C	0.7284	-0.131	0.02803	3.093e-06	Activated & secreting CD4 regulatory T cell %CD4+ T cell || id:ebi-a-GCST90001503	3437
rs138960714	4	123422719	C	A	0.0006	-2.923	0.4989	5.13098e-09	Activated & secreting CD4 regulatory T cell %CD4+ T cell || id:ebi-a-GCST90001503	3437
rs74830391	7	37427289	T	C	0.1525	0.1992	0.03616	3.87097e-08	Activated & secreting CD4 regulatory T cell %CD4+ T cell || id:ebi-a-GCST90001503	3437
rs2958568	8	19426186	C	A	0.4751	0.1207	0.02532	1.93798e-06	Activated & secreting CD4 regulatory T cell %CD4+ T cell || id:ebi-a-GCST90001503	3437
rs61839660	10	6094697	T	C	0.0543	0.4097	0.05516	1.38007e-13	Activated & secreting CD4 regulatory T cell %CD4+ T cell || id:ebi-a-GCST90001503	3437
rs11256966	10	6185310	G	C	0.3848	-0.1567	0.02626	2.64101e-09	Activated & secreting CD4 regulatory T cell %CD4+ T cell || id:ebi-a-GCST90001503	3437
rs138514398	11	66788802	G	T		-9.179	1.962	3.004e-06	Activated & secreting CD4 regulatory T cell %CD4+ T cell || id:ebi-a-GCST90001503	3437
rs149375589	11	67333370	G	T	0.0004	-2.841	0.5947	1.84999e-06	Activated & secreting CD4 regulatory T cell %CD4+ T cell || id:ebi-a-GCST90001503	3437
rs17465223	12	23612754	A	G	0.1318	-0.1728	0.03682	2.80899e-06	Activated & secreting CD4 regulatory T cell %CD4+ T cell || id:ebi-a-GCST90001503	3437
rs145444215	14	103258906	A	G	0.0009	-1.986	0.4154	1.82802e-06	Activated & secreting CD4 regulatory T cell %CD4+ T cell || id:ebi-a-GCST90001503	3437
rs4901222	14	38241882	T	C	0.0004	-2.838	0.5947	1.894e-06	Activated & secreting CD4 regulatory T cell %CD4+ T cell || id:ebi-a-GCST90001503	3437
rs6065288	20	39567774	T	C	0.2026	0.1447	0.03148	4.427e-06	Activated & secreting CD4 regulatory T cell %CD4+ T cell || id:ebi-a-GCST90001503	3437
rs147838148	22	47814108	G	T	0.0006	-2.662	0.4776	2.68398e-08	Activated & secreting CD4 regulatory T cell %CD4+ T cell || id:ebi-a-GCST90001503	3437
rs61817905	1	113666355	T	G	0.1154	-0.1911	0.04127	3.80496e-06	CD25++ CD4+ T cell Absolute Count || id:ebi-a-GCST90001504	3405
rs78193200	1	149148053	A	G	0.0167	-0.4772	0.1039	4.53002e-06	CD25++ CD4+ T cell Absolute Count || id:ebi-a-GCST90001504	3405
rs150956240	2	21238984	G	A	0.0091	0.6588	0.1379	1.84001e-06	CD25++ CD4+ T cell Absolute Count || id:ebi-a-GCST90001504	3405
rs507492	6	109031005	C	G	0.007	0.7221	0.1498	1.502e-06	CD25++ CD4+ T cell Absolute Count || id:ebi-a-GCST90001504	3405
rs17717645	7	18003774	C	T	0.0267	0.3864	0.08132	2.09599e-06	CD25++ CD4+ T cell Absolute Count || id:ebi-a-GCST90001504	3405
rs140960913	7	158180337	T	C	0.0276	0.3573	0.07789	4.65704e-06	CD25++ CD4+ T cell Absolute Count || id:ebi-a-GCST90001504	3405
rs61839660	10	6094697	T	C	0.0542	0.4625	0.05656	4.05415e-16	CD25++ CD4+ T cell Absolute Count || id:ebi-a-GCST90001504	3405
rs137903114	11	130770585	C	T	0.0035	-0.9764	0.2119	4.21502e-06	CD25++ CD4+ T cell Absolute Count || id:ebi-a-GCST90001504	3405
rs145600407	13	19280601	T	C	0.0206	-0.4767	0.1041	4.82103e-06	CD25++ CD4+ T cell Absolute Count || id:ebi-a-GCST90001504	3405
rs142289362	16	77778611	A	G	0.016	0.4896	0.1007	1.232e-06	CD25++ CD4+ T cell Absolute Count || id:ebi-a-GCST90001504	3405
rs149951966	17	41137136	C	T	0.1035	0.2152	0.04361	8.48106e-07	CD25++ CD4+ T cell Absolute Count || id:ebi-a-GCST90001504	3405
rs11697981	20	43093014	C	T	0.132	0.1763	0.03779	3.209e-06	CD25++ CD4+ T cell Absolute Count || id:ebi-a-GCST90001504	3405
rs6131700	20	15742230	C	G	0.0311	-0.3605	0.07513	1.67402e-06	CD25++ CD4+ T cell Absolute Count || id:ebi-a-GCST90001504	3405
rs2019002	22	25652094	A	G	0.4972	0.1203	0.02597	3.71604e-06	CD25++ CD4+ T cell Absolute Count || id:ebi-a-GCST90001504	3405
rs140655813	1	163746986	T	C	0.0207	-0.4015	0.08763	4.77002e-06	CD25++ CD4+ T cell %CD4+ T cell || id:ebi-a-GCST90001505	3437
rs115815681	1	149047683	A	C	0.0132	-0.5788	0.12	1.45999e-06	CD25++ CD4+ T cell %CD4+ T cell || id:ebi-a-GCST90001505	3437
rs79327855	3	144158111	T	C	0.0009	-1.787	0.3883	4.30398e-06	CD25++ CD4+ T cell %CD4+ T cell || id:ebi-a-GCST90001505	3437
rs9268791	6	32421073	C	T	0.7472	-0.157	0.03295	1.95398e-06	CD25++ CD4+ T cell %CD4+ T cell || id:ebi-a-GCST90001505	3437
rs7831142	8	1673599	A	G	0.1852	0.1491	0.03212	3.596e-06	CD25++ CD4+ T cell %CD4+ T cell || id:ebi-a-GCST90001505	3437
rs117760133	8	129187397	T	G	0.07	0.2309	0.04892	2.452e-06	CD25++ CD4+ T cell %CD4+ T cell || id:ebi-a-GCST90001505	3437
rs114400243	9	11577096	A	T	0.0198	-0.4481	0.09544	2.76001e-06	CD25++ CD4+ T cell %CD4+ T cell || id:ebi-a-GCST90001505	3437
rs71479760	10	6183872	A	C	0.3695	-0.1358	0.02644	2.96797e-07	CD25++ CD4+ T cell %CD4+ T cell || id:ebi-a-GCST90001505	3437
rs61839660	10	6094697	T	C	0.0543	0.592	0.05509	1.63682e-26	CD25++ CD4+ T cell %CD4+ T cell || id:ebi-a-GCST90001505	3437
rs11603619	11	12094804	A	G	0.0159	-0.476	0.09847	1.39901e-06	CD25++ CD4+ T cell %CD4+ T cell || id:ebi-a-GCST90001505	3437
rs116928928	11	32030595	C	T	0.0407	-0.2994	0.06501	4.27396e-06	CD25++ CD4+ T cell %CD4+ T cell || id:ebi-a-GCST90001505	3437
rs7305147	12	23524261	C	T	0.8718	0.176	0.03798	3.74197e-06	CD25++ CD4+ T cell %CD4+ T cell || id:ebi-a-GCST90001505	3437
rs74553250	17	40063525	T	C	0.1135	-0.1839	0.04016	4.853e-06	CD25++ CD4+ T cell %CD4+ T cell || id:ebi-a-GCST90001505	3437
rs12458491	18	35307820	T	A	0.0188	0.4545	0.09235	9.02298e-07	CD25++ CD4+ T cell %CD4+ T cell || id:ebi-a-GCST90001505	3437
rs80266752	20	52010540	C	G	0.0368	0.3302	0.06621	6.422e-07	CD25++ CD4+ T cell %CD4+ T cell || id:ebi-a-GCST90001505	3437
rs115815681	1	149047683	A	C	0.0132	-0.5916	0.1206	9.73801e-07	CD25++ CD4+ T cell %T cell || id:ebi-a-GCST90001506	3437
rs113339346	2	42801648	T	C	0.0634	0.2544	0.05459	3.27303e-06	CD25++ CD4+ T cell %T cell || id:ebi-a-GCST90001506	3437
rs79327855	3	144158111	T	C	0.0009	-2.022	0.39	2.27698e-07	CD25++ CD4+ T cell %T cell || id:ebi-a-GCST90001506	3437
rs6771179	3	14769598	G	C	0.5601	-0.1174	0.02547	4.20504e-06	CD25++ CD4+ T cell %T cell || id:ebi-a-GCST90001506	3437
rs2403273	4	1760374	G	C	0.1269	-0.1753	0.03831	4.92595e-06	CD25++ CD4+ T cell %T cell || id:ebi-a-GCST90001506	3437
rs419099	5	102089442	G	A	0.2912	-0.1445	0.02961	1.10101e-06	CD25++ CD4+ T cell %T cell || id:ebi-a-GCST90001506	3437
rs117469911	7	79791344	A	C	0.0036	-0.9208	0.1957	2.62803e-06	CD25++ CD4+ T cell %T cell || id:ebi-a-GCST90001506	3437
rs2004605	9	37391292	T	C	0.35	0.1265	0.02692	2.712e-06	CD25++ CD4+ T cell %T cell || id:ebi-a-GCST90001506	3437
rs61839660	10	6094697	T	C	0.0543	0.5156	0.05562	3.2107e-20	CD25++ CD4+ T cell %T cell || id:ebi-a-GCST90001506	3437
rs62626343	10	6128374	G	C	0.214	0.1454	0.0308	2.43899e-06	CD25++ CD4+ T cell %T cell || id:ebi-a-GCST90001506	3437
rs12325554	16	84053417	C	G	0.0147	0.4872	0.1049	3.51399e-06	CD25++ CD4+ T cell %T cell || id:ebi-a-GCST90001506	3437
rs11869223	17	33775713	G	C	0.4364	-0.1182	0.02535	3.21899e-06	CD25++ CD4+ T cell %T cell || id:ebi-a-GCST90001506	3437
rs2702579	18	71659838	T	C	0.049	-0.2661	0.05796	4.54904e-06	CD25++ CD4+ T cell %T cell || id:ebi-a-GCST90001506	3437
rs67691565	20	52169857	A	G	0.134	-0.1757	0.03693	2.03198e-06	CD25++ CD4+ T cell %T cell || id:ebi-a-GCST90001506	3437
rs144350975	1	188000439	A	C	0.0251	0.4366	0.08386	2.03901e-07	CD25++ CD45RA+ CD4 not regulatory T cell Absolute Count || id:ebi-a-GCST90001507	3405
rs141541045	1	182131075	T	A	0.0066	0.7554	0.1582	1.88699e-06	CD25++ CD45RA+ CD4 not regulatory T cell Absolute Count || id:ebi-a-GCST90001507	3405
rs180839256	1	200021804	C	T	0.0078	0.7176	0.1453	8.28095e-07	CD25++ CD45RA+ CD4 not regulatory T cell Absolute Count || id:ebi-a-GCST90001507	3405
rs116794175	1	194010208	C	T	0.0043	1.029	0.1996	2.646e-07	CD25++ CD45RA+ CD4 not regulatory T cell Absolute Count || id:ebi-a-GCST90001507	3405
rs116517602	1	198922068	T	C	0.0041	1.722	0.1913	3.67282e-19	CD25++ CD45RA+ CD4 not regulatory T cell Absolute Count || id:ebi-a-GCST90001507	3405
rs11124653	2	39112166	A	C	0.5907	-0.1861	0.0267	3.74197e-12	CD25++ CD45RA+ CD4 not regulatory T cell Absolute Count || id:ebi-a-GCST90001507	3405
rs12712610	2	38897249	G	A	0.2972	0.2347	0.02843	2.14981e-16	CD25++ CD45RA+ CD4 not regulatory T cell Absolute Count || id:ebi-a-GCST90001507	3405
rs17607399	2	41884212	T	C	0.1084	0.1969	0.04229	3.34203e-06	CD25++ CD45RA+ CD4 not regulatory T cell Absolute Count || id:ebi-a-GCST90001507	3405
rs28446907	5	109149543	G	A	0.0063	-0.8126	0.1618	5.37106e-07	CD25++ CD45RA+ CD4 not regulatory T cell Absolute Count || id:ebi-a-GCST90001507	3405
rs75798204	5	129494174	T	C	0.0043	-0.9619	0.1993	1.457e-06	CD25++ CD45RA+ CD4 not regulatory T cell Absolute Count || id:ebi-a-GCST90001507	3405
rs73777152	5	106225233	T	C	0.0372	-0.3121	0.06802	4.62903e-06	CD25++ CD45RA+ CD4 not regulatory T cell Absolute Count || id:ebi-a-GCST90001507	3405
rs10905719	10	6115171	A	G	0.2093	0.1573	0.03239	1.262e-06	CD25++ CD45RA+ CD4 not regulatory T cell Absolute Count || id:ebi-a-GCST90001507	3405
rs75958070	11	79203049	C	G	0.1217	-0.205	0.03989	2.93697e-07	CD25++ CD45RA+ CD4 not regulatory T cell Absolute Count || id:ebi-a-GCST90001507	3405
rs112238613	11	110766468	C	T	0.0013	1.573	0.3324	2.323e-06	CD25++ CD45RA+ CD4 not regulatory T cell Absolute Count || id:ebi-a-GCST90001507	3405
rs79536602	15	78621679	G	T	0.0175	0.4748	0.09741	1.14501e-06	CD25++ CD45RA+ CD4 not regulatory T cell Absolute Count || id:ebi-a-GCST90001507	3405
rs75952429	19	15750527	G	T	0.0439	0.3096	0.06479	1.84302e-06	CD25++ CD45RA+ CD4 not regulatory T cell Absolute Count || id:ebi-a-GCST90001507	3405
rs148388592	19	16483486	A	G	0.0377	0.3347	0.06838	1.03001e-06	CD25++ CD45RA+ CD4 not regulatory T cell Absolute Count || id:ebi-a-GCST90001507	3405
rs57061667	22	24096941	G	A	0.2043	-0.1531	0.0334	4.77298e-06	CD25++ CD45RA+ CD4 not regulatory T cell Absolute Count || id:ebi-a-GCST90001507	3405
rs182812626	1	189980053	G	C	0.0042	1.067	0.206	2.33099e-07	CD25++ CD45RA+ CD4 not regulatory T cell %CD4+ T cell || id:ebi-a-GCST90001508	3437
rs116517602	1	198922068	T	C	0.0041	1.941	0.1905	4.75554e-24	CD25++ CD45RA+ CD4 not regulatory T cell %CD4+ T cell || id:ebi-a-GCST90001508	3437
rs180839256	1	200021804	C	T	0.0077	0.7622	0.1444	1.37899e-07	CD25++ CD45RA+ CD4 not regulatory T cell %CD4+ T cell || id:ebi-a-GCST90001508	3437
rs61836370	1	188691469	G	A	0.0145	0.6318	0.1074	4.41896e-09	CD25++ CD45RA+ CD4 not regulatory T cell %CD4+ T cell || id:ebi-a-GCST90001508	3437
rs141541045	1	182131075	T	A	0.0065	0.7445	0.1572	2.28102e-06	CD25++ CD45RA+ CD4 not regulatory T cell %CD4+ T cell || id:ebi-a-GCST90001508	3437
rs17022951	2	38807441	A	G	0.0326	0.342	0.07231	2.34698e-06	CD25++ CD45RA+ CD4 not regulatory T cell %CD4+ T cell || id:ebi-a-GCST90001508	3437
rs11124653	2	39112166	A	C	0.5911	-0.2138	0.02624	5.22878e-16	CD25++ CD45RA+ CD4 not regulatory T cell %CD4+ T cell || id:ebi-a-GCST90001508	3437
rs13024840	2	38895920	A	T	0.2587	0.2764	0.02911	4.04762e-21	CD25++ CD45RA+ CD4 not regulatory T cell %CD4+ T cell || id:ebi-a-GCST90001508	3437
rs114780506	2	104762054	T	A	0.0006	3.688	0.7859	2.80899e-06	CD25++ CD45RA+ CD4 not regulatory T cell %CD4+ T cell || id:ebi-a-GCST90001508	3437
rs1430018	2	38132316	C	T	0.9022	-0.2323	0.04369	1.12699e-07	CD25++ CD45RA+ CD4 not regulatory T cell %CD4+ T cell || id:ebi-a-GCST90001508	3437
rs114437347	4	86967620	C	G	0.0003	3.89	0.8453	4.33202e-06	CD25++ CD45RA+ CD4 not regulatory T cell %CD4+ T cell || id:ebi-a-GCST90001508	3437
rs117626397	10	131423918	G	A	0.0004	3.007	0.5864	3.095e-07	CD25++ CD45RA+ CD4 not regulatory T cell %CD4+ T cell || id:ebi-a-GCST90001508	3437
rs10905719	10	6115171	A	G	0.2082	0.1841	0.03172	7.05797e-09	CD25++ CD45RA+ CD4 not regulatory T cell %CD4+ T cell || id:ebi-a-GCST90001508	3437
rs149541387	12	15408104	A	T	0.0212	0.4045	0.08806	4.517e-06	CD25++ CD45RA+ CD4 not regulatory T cell %CD4+ T cell || id:ebi-a-GCST90001508	3437
rs79536602	15	78621679	G	T	0.0175	0.4559	0.09637	2.32097e-06	CD25++ CD45RA+ CD4 not regulatory T cell %CD4+ T cell || id:ebi-a-GCST90001508	3437
rs28592611	16	78381297	T	G	0.3945	0.1378	0.02717	4.108e-07	CD25++ CD45RA+ CD4 not regulatory T cell %CD4+ T cell || id:ebi-a-GCST90001508	3437
rs12958644	18	6060693	C	A	0.0599	0.2701	0.05331	4.25696e-07	CD25++ CD45RA+ CD4 not regulatory T cell %CD4+ T cell || id:ebi-a-GCST90001508	3437
rs149429639	18	42913522	C	T	0.001	1.783	0.3741	1.96499e-06	CD25++ CD45RA+ CD4 not regulatory T cell %CD4+ T cell || id:ebi-a-GCST90001508	3437
rs188418491	19	777304	G	A	0.0006	2.218	0.4847	4.88405e-06	CD25++ CD45RA+ CD4 not regulatory T cell %CD4+ T cell || id:ebi-a-GCST90001508	3437
rs180839256	1	200021804	C	T	0.0077	0.7369	0.1443	3.47896e-07	CD25++ CD45RA+ CD4 not regulatory T cell %T cell || id:ebi-a-GCST90001509	3437
rs61836370	1	188691469	G	A	0.0145	0.6084	0.1074	1.57801e-08	CD25++ CD45RA+ CD4 not regulatory T cell %T cell || id:ebi-a-GCST90001509	3437
rs144350975	1	188000439	A	C	0.0253	0.4042	0.08214	9.02402e-07	CD25++ CD45RA+ CD4 not regulatory T cell %T cell || id:ebi-a-GCST90001509	3437
rs116517602	1	198922068	T	C	0.0041	1.875	0.1906	1.49589e-22	CD25++ CD45RA+ CD4 not regulatory T cell %T cell || id:ebi-a-GCST90001509	3437
rs11124653	2	39112166	A	C	0.5911	-0.1952	0.02627	1.35988e-13	CD25++ CD45RA+ CD4 not regulatory T cell %T cell || id:ebi-a-GCST90001509	3437
rs13024840	2	38895920	A	T	0.2587	0.2465	0.02917	4.21697e-17	CD25++ CD45RA+ CD4 not regulatory T cell %T cell || id:ebi-a-GCST90001509	3437
rs17607399	2	41884212	T	C	0.1084	0.1985	0.0414	1.7e-06	CD25++ CD45RA+ CD4 not regulatory T cell %T cell || id:ebi-a-GCST90001509	3437
rs114780506	2	104762054	T	A	0.0006	3.735	0.7854	2.053e-06	CD25++ CD45RA+ CD4 not regulatory T cell %T cell || id:ebi-a-GCST90001509	3437
rs28446907	5	109149543	G	A	0.0063	-0.7381	0.1609	4.64205e-06	CD25++ CD45RA+ CD4 not regulatory T cell %T cell || id:ebi-a-GCST90001509	3437
rs4876568	8	115299703	T	G	0.0185	-0.4787	0.1023	2.96299e-06	CD25++ CD45RA+ CD4 not regulatory T cell %T cell || id:ebi-a-GCST90001509	3437
rs117626397	10	131423918	G	A	0.0004	2.958	0.5861	4.71802e-07	CD25++ CD45RA+ CD4 not regulatory T cell %T cell || id:ebi-a-GCST90001509	3437
rs10905719	10	6115171	A	G	0.2082	0.1734	0.03172	4.88495e-08	CD25++ CD45RA+ CD4 not regulatory T cell %T cell || id:ebi-a-GCST90001509	3437
rs144105723	10	119138812	G	A	0.0649	0.2382	0.05143	3.743e-06	CD25++ CD45RA+ CD4 not regulatory T cell %T cell || id:ebi-a-GCST90001509	3437
rs75958070	11	79203049	C	G	0.1219	-0.1904	0.03919	1.237e-06	CD25++ CD45RA+ CD4 not regulatory T cell %T cell || id:ebi-a-GCST90001509	3437
rs79536602	15	78621679	G	T	0.0175	0.4553	0.09631	2.36102e-06	CD25++ CD45RA+ CD4 not regulatory T cell %T cell || id:ebi-a-GCST90001509	3437
rs28592611	16	78381297	T	G	0.3945	0.1357	0.02715	6.14795e-07	CD25++ CD45RA+ CD4 not regulatory T cell %T cell || id:ebi-a-GCST90001509	3437
rs149429639	18	42913522	C	T	0.001	1.778	0.3739	2.06201e-06	CD25++ CD45RA+ CD4 not regulatory T cell %T cell || id:ebi-a-GCST90001509	3437
rs117882514	18	6105334	C	A	0.0319	0.3547	0.07102	6.17106e-07	CD25++ CD45RA+ CD4 not regulatory T cell %T cell || id:ebi-a-GCST90001509	3437
rs117520868	19	16580644	A	C	0.0343	0.332	0.0722	4.41499e-06	CD25++ CD45RA+ CD4 not regulatory T cell %T cell || id:ebi-a-GCST90001509	3437
rs78193200	1	149148053	A	G	0.0167	-0.4785	0.1045	4.84295e-06	CD25++ CD45RA- CD4 not regulatory T cell Absolute Count || id:ebi-a-GCST90001510	3405
rs11579717	1	199999121	A	G	0.0044	-1.039	0.1939	8.77102e-08	CD25++ CD45RA- CD4 not regulatory T cell Absolute Count || id:ebi-a-GCST90001510	3405
rs113435341	1	198151688	G	A	0.0032	-1.681	0.2295	3.0311e-13	CD25++ CD45RA- CD4 not regulatory T cell Absolute Count || id:ebi-a-GCST90001510	3405
rs138915779	1	190079170	A	C	0.0034	-1.153	0.2379	1.309e-06	CD25++ CD45RA- CD4 not regulatory T cell Absolute Count || id:ebi-a-GCST90001510	3405
rs150956240	2	21238984	G	A	0.0091	0.6392	0.1387	4.21105e-06	CD25++ CD45RA- CD4 not regulatory T cell Absolute Count || id:ebi-a-GCST90001510	3405
rs115575166	2	38573789	A	G	0.0113	-0.5649	0.1208	3.01599e-06	CD25++ CD45RA- CD4 not regulatory T cell Absolute Count || id:ebi-a-GCST90001510	3405
rs60349936	4	32957041	A	T	0.043	0.3065	0.06374	1.58599e-06	CD25++ CD45RA- CD4 not regulatory T cell Absolute Count || id:ebi-a-GCST90001510	3405
rs2596120	8	76660230	A	G	0.2401	-0.1448	0.03079	2.67399e-06	CD25++ CD45RA- CD4 not regulatory T cell Absolute Count || id:ebi-a-GCST90001510	3405
rs61839660	10	6094697	T	C	0.0542	0.5547	0.05665	2.40326e-22	CD25++ CD45RA- CD4 not regulatory T cell Absolute Count || id:ebi-a-GCST90001510	3405
rs137903114	11	130770585	C	T	0.0035	-0.9749	0.2132	4.96101e-06	CD25++ CD45RA- CD4 not regulatory T cell Absolute Count || id:ebi-a-GCST90001510	3405
rs79596262	13	38859265	A	G	0.0016	1.578	0.345	4.98597e-06	CD25++ CD45RA- CD4 not regulatory T cell Absolute Count || id:ebi-a-GCST90001510	3405
rs144999003	15	33593233	T	C	0.004	0.9382	0.198	2.231e-06	CD25++ CD45RA- CD4 not regulatory T cell Absolute Count || id:ebi-a-GCST90001510	3405
rs143283244	15	94643151	A	G	0.0006	-2.405	0.5001	1.58599e-06	CD25++ CD45RA- CD4 not regulatory T cell Absolute Count || id:ebi-a-GCST90001510	3405
rs142289362	16	77778611	A	G	0.016	0.4965	0.1013	1.006e-06	CD25++ CD45RA- CD4 not regulatory T cell Absolute Count || id:ebi-a-GCST90001510	3405
rs117614870	17	63857170	T	C	0.0085	0.7075	0.144	9.3981e-07	CD25++ CD45RA- CD4 not regulatory T cell Absolute Count || id:ebi-a-GCST90001510	3405
rs72942206	18	55275584	A	G	0.2085	0.1475	0.03153	3.00601e-06	CD25++ CD45RA- CD4 not regulatory T cell Absolute Count || id:ebi-a-GCST90001510	3405
rs187133679	19	34592058	T	A	0.0047	0.88	0.1922	4.87203e-06	CD25++ CD45RA- CD4 not regulatory T cell Absolute Count || id:ebi-a-GCST90001510	3405
rs11697981	20	43093014	C	T	0.132	0.1755	0.03802	4.05602e-06	CD25++ CD45RA- CD4 not regulatory T cell Absolute Count || id:ebi-a-GCST90001510	3405
rs6131700	20	15742230	C	G	0.0311	-0.3793	0.07555	5.431e-07	CD25++ CD45RA- CD4 not regulatory T cell Absolute Count || id:ebi-a-GCST90001510	3405
rs17583875	1	197924770	A	G	0.0029	-1.737	0.2311	7.08272e-14	CD25++ CD45RA- CD4 not regulatory T cell %CD4+ T cell || id:ebi-a-GCST90001511	3437
rs116794175	1	194010208	C	T	0.0042	-1.101	0.1969	2.45901e-08	CD25++ CD45RA- CD4 not regulatory T cell %CD4+ T cell || id:ebi-a-GCST90001511	3437
rs4955262	3	32259389	A	G	0.5921	-0.1201	0.02581	3.42003e-06	CD25++ CD45RA- CD4 not regulatory T cell %CD4+ T cell || id:ebi-a-GCST90001511	3437
rs9268791	6	32421073	C	T	0.7472	-0.1554	0.03307	2.74303e-06	CD25++ CD45RA- CD4 not regulatory T cell %CD4+ T cell || id:ebi-a-GCST90001511	3437
rs76420648	8	24588282	A	G	0.0364	-0.3221	0.0695	3.70297e-06	CD25++ CD45RA- CD4 not regulatory T cell %CD4+ T cell || id:ebi-a-GCST90001511	3437
rs62518962	8	138341531	A	G	0.0298	-0.3386	0.07329	3.99098e-06	CD25++ CD45RA- CD4 not regulatory T cell %CD4+ T cell || id:ebi-a-GCST90001511	3437
rs35825512	9	20167602	T	C	0.1189	0.1893	0.03901	1.268e-06	CD25++ CD45RA- CD4 not regulatory T cell %CD4+ T cell || id:ebi-a-GCST90001511	3437
rs61839660	10	6094697	T	C	0.0543	0.6146	0.05523	2.77588e-28	CD25++ CD45RA- CD4 not regulatory T cell %CD4+ T cell || id:ebi-a-GCST90001511	3437
rs116928928	11	32030595	C	T	0.0407	-0.2998	0.06526	4.517e-06	CD25++ CD45RA- CD4 not regulatory T cell %CD4+ T cell || id:ebi-a-GCST90001511	3437
rs7105186	11	122746450	A	G	0.0662	-0.2286	0.04992	4.81604e-06	CD25++ CD45RA- CD4 not regulatory T cell %CD4+ T cell || id:ebi-a-GCST90001511	3437
rs10785396	12	43312063	A	G	0.6852	-0.1309	0.02734	1.749e-06	CD25++ CD45RA- CD4 not regulatory T cell %CD4+ T cell || id:ebi-a-GCST90001511	3437
rs149406003	13	101206935	A	G	0.0499	-0.2876	0.05719	5.17798e-07	CD25++ CD45RA- CD4 not regulatory T cell %CD4+ T cell || id:ebi-a-GCST90001511	3437
rs143283244	15	94643151	A	G	0.0006	-2.405	0.4952	1.243e-06	CD25++ CD45RA- CD4 not regulatory T cell %CD4+ T cell || id:ebi-a-GCST90001511	3437
rs12458491	18	35307820	T	A	0.0188	0.5009	0.09263	6.82905e-08	CD25++ CD45RA- CD4 not regulatory T cell %CD4+ T cell || id:ebi-a-GCST90001511	3437
rs80266752	20	52010540	C	G	0.0368	0.3191	0.06647	1.64999e-06	CD25++ CD45RA- CD4 not regulatory T cell %CD4+ T cell || id:ebi-a-GCST90001511	3437
rs148871284	20	15546558	T	C	0.0343	0.3478	0.07003	7.13099e-07	CD25++ CD45RA- CD4 not regulatory T cell %CD4+ T cell || id:ebi-a-GCST90001511	3437
rs4497244	1	197997953	A	G	0.0033	-1.396	0.2116	4.85736e-11	CD25++ CD45RA- CD4 not regulatory T cell %T cell || id:ebi-a-GCST90001512	3437
rs116794175	1	194010208	C	T	0.0042	-0.9442	0.197	1.72302e-06	CD25++ CD45RA- CD4 not regulatory T cell %T cell || id:ebi-a-GCST90001512	3437
rs11579717	1	199999121	A	G	0.0044	-1.078	0.1911	1.83202e-08	CD25++ CD45RA- CD4 not regulatory T cell %T cell || id:ebi-a-GCST90001512	3437
rs17666424	1	159187530	A	G	0.0912	0.212	0.04507	2.65797e-06	CD25++ CD45RA- CD4 not regulatory T cell %T cell || id:ebi-a-GCST90001512	3437
rs6771179	3	14769598	G	C	0.5601	-0.119	0.02542	2.94897e-06	CD25++ CD45RA- CD4 not regulatory T cell %T cell || id:ebi-a-GCST90001512	3437
rs139048853	4	69570859	C	T	0.0646	-0.2433	0.05164	2.56201e-06	CD25++ CD45RA- CD4 not regulatory T cell %T cell || id:ebi-a-GCST90001512	3437
rs1558501	4	55482148	C	G	0.2518	-0.1391	0.02923	2.037e-06	CD25++ CD45RA- CD4 not regulatory T cell %T cell || id:ebi-a-GCST90001512	3437
rs419099	5	102089442	G	A	0.2912	-0.1371	0.02955	3.61002e-06	CD25++ CD45RA- CD4 not regulatory T cell %T cell || id:ebi-a-GCST90001512	3437
rs6912413	6	22960927	G	C	0.1263	-0.1789	0.03881	4.17503e-06	CD25++ CD45RA- CD4 not regulatory T cell %T cell || id:ebi-a-GCST90001512	3437
rs7017671	8	128467754	G	C	0.3883	0.1194	0.02605	4.74504e-06	CD25++ CD45RA- CD4 not regulatory T cell %T cell || id:ebi-a-GCST90001512	3437
rs2004605	9	37391292	T	C	0.35	0.1253	0.02686	3.19198e-06	CD25++ CD45RA- CD4 not regulatory T cell %T cell || id:ebi-a-GCST90001512	3437
rs12006014	9	20160505	A	G	0.1158	0.183	0.03935	3.422e-06	CD25++ CD45RA- CD4 not regulatory T cell %T cell || id:ebi-a-GCST90001512	3437
rs61839660	10	6094697	T	C	0.0543	0.5758	0.05532	5.32353e-25	CD25++ CD45RA- CD4 not regulatory T cell %T cell || id:ebi-a-GCST90001512	3437
rs143283244	15	94643151	A	G	0.0006	-2.27	0.4951	4.701e-06	CD25++ CD45RA- CD4 not regulatory T cell %T cell || id:ebi-a-GCST90001512	3437
rs12458491	18	35307820	T	A	0.0188	0.4275	0.09269	4.12601e-06	CD25++ CD45RA- CD4 not regulatory T cell %T cell || id:ebi-a-GCST90001512	3437
rs2702579	18	71659838	T	C	0.049	-0.2771	0.05782	1.72302e-06	CD25++ CD45RA- CD4 not regulatory T cell %T cell || id:ebi-a-GCST90001512	3437
rs148871284	20	15546558	T	C	0.0343	0.3269	0.07002	3.14702e-06	CD25++ CD45RA- CD4 not regulatory T cell %T cell || id:ebi-a-GCST90001512	3437
rs76202906	1	113476831	A	C	0.0301	-0.3536	0.07325	1.44099e-06	CD4 regulatory T cell Absolute Count || id:ebi-a-GCST90001513	3405
rs1268153	6	109035696	A	G	0.0053	0.8168	0.17	1.61202e-06	CD4 regulatory T cell Absolute Count || id:ebi-a-GCST90001513	3405
rs17717645	7	18003774	C	T	0.0267	0.391	0.07969	9.68992e-07	CD4 regulatory T cell Absolute Count || id:ebi-a-GCST90001513	3405
rs11772999	7	113991516	G	T	0.0078	0.6586	0.1437	4.77101e-06	CD4 regulatory T cell Absolute Count || id:ebi-a-GCST90001513	3405
rs140960913	7	158180337	T	C	0.0276	0.3563	0.07657	3.38797e-06	CD4 regulatory T cell Absolute Count || id:ebi-a-GCST90001513	3405
rs61839660	10	6094697	T	C	0.0542	0.2717	0.05567	1.10301e-06	CD4 regulatory T cell Absolute Count || id:ebi-a-GCST90001513	3405
rs145600407	13	19280601	T	C	0.0206	-0.4993	0.1023	1.102e-06	CD4 regulatory T cell Absolute Count || id:ebi-a-GCST90001513	3405
rs78334049	14	93385046	A	G	0.1051	0.1988	0.04067	1.06901e-06	CD4 regulatory T cell Absolute Count || id:ebi-a-GCST90001513	3405
rs7162344	15	26030485	A	G	0.4314	-0.1224	0.02515	1.19501e-06	CD4 regulatory T cell Absolute Count || id:ebi-a-GCST90001513	3405
rs188505795	16	28223373	T	G	0.0388	0.3047	0.065	2.87197e-06	CD4 regulatory T cell Absolute Count || id:ebi-a-GCST90001513	3405
rs149951966	17	41137136	C	T	0.1035	0.2109	0.04275	8.45707e-07	CD4 regulatory T cell Absolute Count || id:ebi-a-GCST90001513	3405
rs72833913	17	5713335	A	C	0.1065	0.1885	0.04072	3.79603e-06	CD4 regulatory T cell Absolute Count || id:ebi-a-GCST90001513	3405
rs9709738	18	60137303	C	G	0.7336	-0.1376	0.02823	1.148e-06	CD4 regulatory T cell Absolute Count || id:ebi-a-GCST90001513	3405
rs76038700	2	135226197	C	T	0.1485	0.2177	0.0451	1.493e-06	Hematopoietic Stem Cell Absolute Count || id:ebi-a-GCST90001514	1858
rs1432243	2	137773206	C	T	0.9771	-0.5029	0.1032	1.20099e-06	Hematopoietic Stem Cell Absolute Count || id:ebi-a-GCST90001514	1858
rs115937242	2	136121922	A	G	0.0086	1.543	0.1747	2.30303e-18	Hematopoietic Stem Cell Absolute Count || id:ebi-a-GCST90001514	1858
rs74529033	2	137747326	G	A	0.0081	1.453	0.1814	1.9971e-15	Hematopoietic Stem Cell Absolute Count || id:ebi-a-GCST90001514	1858
rs112258784	2	191015741	G	A	0.0102	-0.7371	0.1606	4.75094e-06	Hematopoietic Stem Cell Absolute Count || id:ebi-a-GCST90001514	1858
rs2887466	3	131748507	T	C	0.5823	0.152	0.03257	3.24997e-06	Hematopoietic Stem Cell Absolute Count || id:ebi-a-GCST90001514	1858
rs10080768	6	2760245	T	C	0.7374	0.1703	0.03596	2.34202e-06	Hematopoietic Stem Cell Absolute Count || id:ebi-a-GCST90001514	1858
rs142114110	7	82240518	G	A	0.0334	-0.4209	0.08967	2.87402e-06	Hematopoietic Stem Cell Absolute Count || id:ebi-a-GCST90001514	1858
rs77538571	8	4006968	G	C	0.0062	0.9085	0.1977	4.58997e-06	Hematopoietic Stem Cell Absolute Count || id:ebi-a-GCST90001514	1858
rs10809987	9	13585363	C	T	0.1082	0.2534	0.05071	6.39102e-07	Hematopoietic Stem Cell Absolute Count || id:ebi-a-GCST90001514	1858
rs77058454	15	81301816	T	C	0.0038	-1.326	0.2766	1.77501e-06	Hematopoietic Stem Cell Absolute Count || id:ebi-a-GCST90001514	1858
rs74227709	1	247722588	A	G	0.0584	-0.3383	0.07002	1.47201e-06	Immature Myeloid-Derived Suppressor Cells Absolute Count || id:ebi-a-GCST90001515	1857
rs347282	1	162312753	G	T	0.7124	-0.1767	0.03762	2.83602e-06	Immature Myeloid-Derived Suppressor Cells Absolute Count || id:ebi-a-GCST90001515	1857
rs113696385	2	176971968	T	G	0.0293	-0.5264	0.1007	1.90498e-07	Immature Myeloid-Derived Suppressor Cells Absolute Count || id:ebi-a-GCST90001515	1857
rs9829934	3	113575708	T	A	0.0582	-0.3866	0.07377	1.78698e-07	Immature Myeloid-Derived Suppressor Cells Absolute Count || id:ebi-a-GCST90001515	1857
rs1421603	7	131327890	T	C	0.9047	0.2687	0.05618	1.862e-06	Immature Myeloid-Derived Suppressor Cells Absolute Count || id:ebi-a-GCST90001515	1857
rs72841673	10	125501892	T	C	0.0083	-0.8322	0.1774	2.922e-06	Immature Myeloid-Derived Suppressor Cells Absolute Count || id:ebi-a-GCST90001515	1857
rs2420243	10	117921053	T	A	0.0027	-1.55	0.3181	1.18899e-06	Immature Myeloid-Derived Suppressor Cells Absolute Count || id:ebi-a-GCST90001515	1857
rs141792521	16	58686745	G	A	0.0137	-0.7864	0.1448	6.37294e-08	Immature Myeloid-Derived Suppressor Cells Absolute Count || id:ebi-a-GCST90001515	1857
rs17801681	19	51676649	T	C	0.1201	0.278	0.05161	8.12007e-08	Immature Myeloid-Derived Suppressor Cells Absolute Count || id:ebi-a-GCST90001515	1857
rs2455069	19	51728641	G	A	0.5197	0.3938	0.03247	1.24911e-32	Immature Myeloid-Derived Suppressor Cells Absolute Count || id:ebi-a-GCST90001515	1857
rs1654530	19	51476281	G	A	0.1314	0.2453	0.0488	5.45494e-07	Immature Myeloid-Derived Suppressor Cells Absolute Count || id:ebi-a-GCST90001515	1857
rs4499342	19	8786913	T	C	0.1527	-0.2816	0.04685	2.20298e-09	Immature Myeloid-Derived Suppressor Cells Absolute Count || id:ebi-a-GCST90001515	1857
rs12094489	1	247286936	A	G	0.1373	-0.2383	0.04837	9.09097e-07	Immature Myeloid-Derived Suppressor Cells %CD33dim HLA DR- CD66b- || id:ebi-a-GCST90001516	1857
rs72923436	2	176970247	A	C	0.0307	-0.5379	0.09656	2.91897e-08	Immature Myeloid-Derived Suppressor Cells %CD33dim HLA DR- CD66b- || id:ebi-a-GCST90001516	1857
rs9829934	3	113575708	T	A	0.0582	-0.3737	0.07241	2.72402e-07	Immature Myeloid-Derived Suppressor Cells %CD33dim HLA DR- CD66b- || id:ebi-a-GCST90001516	1857
rs469318	5	179340006	C	T	0.3024	-0.167	0.03564	2.98497e-06	Immature Myeloid-Derived Suppressor Cells %CD33dim HLA DR- CD66b- || id:ebi-a-GCST90001516	1857
rs147302158	9	32093300	G	A	0.0369	-0.4335	0.09126	2.19498e-06	Immature Myeloid-Derived Suppressor Cells %CD33dim HLA DR- CD66b- || id:ebi-a-GCST90001516	1857
rs2420243	10	117921053	T	A	0.0027	-1.503	0.3142	1.852e-06	Immature Myeloid-Derived Suppressor Cells %CD33dim HLA DR- CD66b- || id:ebi-a-GCST90001516	1857
rs3829176	10	127752441	T	C	0.0132	-0.675	0.1452	3.58699e-06	Immature Myeloid-Derived Suppressor Cells %CD33dim HLA DR- CD66b- || id:ebi-a-GCST90001516	1857
rs4499342	19	8786913	T	C	0.1527	-0.2163	0.04632	3.24601e-06	Immature Myeloid-Derived Suppressor Cells %CD33dim HLA DR- CD66b- || id:ebi-a-GCST90001516	1857
rs1701958	19	51476715	G	C	0.1314	0.2248	0.04819	3.31101e-06	Immature Myeloid-Derived Suppressor Cells %CD33dim HLA DR- CD66b- || id:ebi-a-GCST90001516	1857
rs2455069	19	51728641	G	A	0.5197	0.2522	0.03266	1.8608e-14	Immature Myeloid-Derived Suppressor Cells %CD33dim HLA DR- CD66b- || id:ebi-a-GCST90001516	1857
rs1537122	21	46598506	T	C	0.5312	-0.1594	0.03332	1.85999e-06	Immature Myeloid-Derived Suppressor Cells %CD33dim HLA DR- CD66b- || id:ebi-a-GCST90001516	1857
rs2703989	1	90495703	T	C	0.0105	0.7558	0.1608	2.80899e-06	CD33+ HLA DR+ Absolute Count || id:ebi-a-GCST90001517	1858
rs11161969	1	87752464	G	A	0.4128	0.1593	0.03298	1.483e-06	CD33+ HLA DR+ Absolute Count || id:ebi-a-GCST90001517	1858
rs5020267	2	147077389	G	A	0.1453	0.2285	0.0465	9.69304e-07	CD33+ HLA DR+ Absolute Count || id:ebi-a-GCST90001517	1858
rs3770997	2	206649338	C	T	0.3103	0.1643	0.03508	3.02002e-06	CD33+ HLA DR+ Absolute Count || id:ebi-a-GCST90001517	1858
rs143438920	3	15416436	A	C	0.01	-0.7744	0.1677	4.14801e-06	CD33+ HLA DR+ Absolute Count || id:ebi-a-GCST90001517	1858
rs115418145	4	130012204	T	G	0.0005	3.847	0.8008	1.67498e-06	CD33+ HLA DR+ Absolute Count || id:ebi-a-GCST90001517	1858
rs73248200	4	27723538	G	T	0.2801	0.1792	0.03652	1.011e-06	CD33+ HLA DR+ Absolute Count || id:ebi-a-GCST90001517	1858
rs505769	5	29036863	A	C	0.2672	0.1809	0.03789	1.93402e-06	CD33+ HLA DR+ Absolute Count || id:ebi-a-GCST90001517	1858
rs77906933	6	125326624	G	A	0.0022	1.586	0.3361	2.54097e-06	CD33+ HLA DR+ Absolute Count || id:ebi-a-GCST90001517	1858
rs182908654	7	141084101	C	T	0.0019	-2.346	0.4382	9.67008e-08	CD33+ HLA DR+ Absolute Count || id:ebi-a-GCST90001517	1858
rs11777538	8	127623130	G	A	0.1889	-0.1958	0.04267	4.77705e-06	CD33+ HLA DR+ Absolute Count || id:ebi-a-GCST90001517	1858
rs182483660	10	90000206	T	C	0.0533	0.3546	0.07364	1.59001e-06	CD33+ HLA DR+ Absolute Count || id:ebi-a-GCST90001517	1858
rs10740011	10	61890937	T	G	0.4594	-0.1538	0.03237	2.15799e-06	CD33+ HLA DR+ Absolute Count || id:ebi-a-GCST90001517	1858
rs143612223	10	112429560	T	A	0.0005	3.416	0.6702	3.79901e-07	CD33+ HLA DR+ Absolute Count || id:ebi-a-GCST90001517	1858
rs61916462	11	101619255	A	G	0.1418	0.2229	0.04674	2e-06	CD33+ HLA DR+ Absolute Count || id:ebi-a-GCST90001517	1858
rs12297491	12	1731406	A	C	0.1671	0.2117	0.0447	2.34801e-06	CD33+ HLA DR+ Absolute Count || id:ebi-a-GCST90001517	1858
rs35948572	16	5666157	T	C	0.1593	0.2079	0.04443	3.09899e-06	CD33+ HLA DR+ Absolute Count || id:ebi-a-GCST90001517	1858
rs13334605	16	8615510	G	C	0.6631	0.1693	0.03482	1.262e-06	CD33+ HLA DR+ Absolute Count || id:ebi-a-GCST90001517	1858
rs74253876	18	5858361	T	C	0.2177	-0.2048	0.0394	2.249e-07	CD33+ HLA DR+ Absolute Count || id:ebi-a-GCST90001517	1858
rs117285079	18	4762780	G	C	0.0401	-0.3814	0.08257	4.12895e-06	CD33+ HLA DR+ Absolute Count || id:ebi-a-GCST90001517	1858
rs3865444	19	51727962	A	C	0.2131	-0.3696	0.03875	4.35913e-21	CD33+ HLA DR+ Absolute Count || id:ebi-a-GCST90001517	1858
rs2703989	1	90495703	T	C	0.0105	0.7944	0.1623	1.06299e-06	CD33+ HLA DR+ CD14- Absolute Count || id:ebi-a-GCST90001518	1858
rs5020267	2	147077389	G	A	0.1453	0.2171	0.04709	4.29101e-06	CD33+ HLA DR+ CD14- Absolute Count || id:ebi-a-GCST90001518	1858
rs9990730	4	183610911	C	A	0.6983	-0.172	0.03553	1.40501e-06	CD33+ HLA DR+ CD14- Absolute Count || id:ebi-a-GCST90001518	1858
rs6858113	4	27713713	A	G	0.3388	0.1616	0.03485	3.76504e-06	CD33+ HLA DR+ CD14- Absolute Count || id:ebi-a-GCST90001518	1858
rs115418145	4	130012204	T	G	0.0005	3.845	0.8059	1.97201e-06	CD33+ HLA DR+ CD14- Absolute Count || id:ebi-a-GCST90001518	1858
rs505806	5	29036851	A	G	0.2672	0.1855	0.03836	1.42899e-06	CD33+ HLA DR+ CD14- Absolute Count || id:ebi-a-GCST90001518	1858
rs77906933	6	125326624	G	A	0.0022	1.56	0.3396	4.65897e-06	CD33+ HLA DR+ CD14- Absolute Count || id:ebi-a-GCST90001518	1858
rs182908654	7	141084101	C	T	0.0019	-2.363	0.4476	1.447e-07	CD33+ HLA DR+ CD14- Absolute Count || id:ebi-a-GCST90001518	1858
rs138272175	9	945397	T	C	0.0355	0.4332	0.0905	1.826e-06	CD33+ HLA DR+ CD14- Absolute Count || id:ebi-a-GCST90001518	1858
rs75873877	10	89722783	C	T	0.0603	0.3336	0.07025	2.201e-06	CD33+ HLA DR+ CD14- Absolute Count || id:ebi-a-GCST90001518	1858
rs143612223	10	112429560	T	A	0.0005	3.174	0.6763	2.89201e-06	CD33+ HLA DR+ CD14- Absolute Count || id:ebi-a-GCST90001518	1858
rs61916496	11	101684475	T	A	0.1674	0.2063	0.04447	3.76504e-06	CD33+ HLA DR+ CD14- Absolute Count || id:ebi-a-GCST90001518	1858
rs4020134	14	78420741	G	A	0.6284	-0.1615	0.03468	3.425e-06	CD33+ HLA DR+ CD14- Absolute Count || id:ebi-a-GCST90001518	1858
rs57812633	16	5690721	G	A	0.152	0.2146	0.04524	2.25398e-06	CD33+ HLA DR+ CD14- Absolute Count || id:ebi-a-GCST90001518	1858
rs13334605	16	8615510	G	C	0.6631	0.1663	0.03526	2.58101e-06	CD33+ HLA DR+ CD14- Absolute Count || id:ebi-a-GCST90001518	1858
rs117019089	16	69342268	T	G	0.0005	3.21	0.6755	2.173e-06	CD33+ HLA DR+ CD14- Absolute Count || id:ebi-a-GCST90001518	1858
rs16988845	19	51549527	A	C	0.5326	0.1559	0.03326	2.97502e-06	CD33+ HLA DR+ CD14- Absolute Count || id:ebi-a-GCST90001518	1858
rs3865444	19	51727962	A	C	0.2131	-0.3767	0.03917	2.12618e-21	CD33+ HLA DR+ CD14- Absolute Count || id:ebi-a-GCST90001518	1858
rs12033128	1	85552939	C	T	0.1389	-0.262	0.04799	5.40194e-08	CD33+ HLA DR+ CD14- %CD33+ HLA DR+ || id:ebi-a-GCST90001519	1858
rs16865573	2	6895049	C	T	0.2199	-0.196	0.04137	2.31601e-06	CD33+ HLA DR+ CD14- %CD33+ HLA DR+ || id:ebi-a-GCST90001519	1858
rs116534482	2	142334140	C	T	0.0342	0.4192	0.09019	3.578e-06	CD33+ HLA DR+ CD14- %CD33+ HLA DR+ || id:ebi-a-GCST90001519	1858
rs218773	4	14437080	G	A	0.937	0.3392	0.06898	9.57304e-07	CD33+ HLA DR+ CD14- %CD33+ HLA DR+ || id:ebi-a-GCST90001519	1858
rs6844114	4	190745892	A	G	0.0269	-0.4891	0.1041	2.83302e-06	CD33+ HLA DR+ CD14- %CD33+ HLA DR+ || id:ebi-a-GCST90001519	1858
rs62350505	4	165304812	G	C	0.0054	1.103	0.236	3.14e-06	CD33+ HLA DR+ CD14- %CD33+ HLA DR+ || id:ebi-a-GCST90001519	1858
rs7116432	11	35244058	G	A	0.2333	-0.1819	0.03952	4.43098e-06	CD33+ HLA DR+ CD14- %CD33+ HLA DR+ || id:ebi-a-GCST90001519	1858
rs2529690	17	12239004	A	G	0.1747	0.2193	0.0438	6.01603e-07	CD33+ HLA DR+ CD14- %CD33+ HLA DR+ || id:ebi-a-GCST90001519	1858
rs113548770	18	70222212	G	A	0.0019	-1.707	0.3645	3.02301e-06	CD33+ HLA DR+ CD14- %CD33+ HLA DR+ || id:ebi-a-GCST90001519	1858
rs7245846	19	51731176	A	G	0.2236	-0.3128	0.03922	2.6339e-15	CD33+ HLA DR+ CD14- %CD33+ HLA DR+ || id:ebi-a-GCST90001519	1858
rs62197298	20	61646108	T	C	0.1173	-0.2378	0.05142	4.018e-06	CD33+ HLA DR+ CD14- %CD33+ HLA DR+ || id:ebi-a-GCST90001519	1858
rs76694877	3	27966223	G	T	0.0492	-0.3759	0.07589	7.955e-07	CD33+ HLA DR+ CD14dim Absolute Count || id:ebi-a-GCST90001520	1858
rs112790132	3	115423600	A	G	0.0118	-0.7381	0.1481	6.81993e-07	CD33+ HLA DR+ CD14dim Absolute Count || id:ebi-a-GCST90001520	1858
rs142786778	6	23419953	A	G	0.0019	-1.725	0.3728	3.96196e-06	CD33+ HLA DR+ CD14dim Absolute Count || id:ebi-a-GCST90001520	1858
rs187876923	6	125217867	T	C	0.0215	0.5732	0.1195	1.74301e-06	CD33+ HLA DR+ CD14dim Absolute Count || id:ebi-a-GCST90001520	1858
rs182908654	7	141084101	C	T	0.0019	-2.178	0.4366	6.68005e-07	CD33+ HLA DR+ CD14dim Absolute Count || id:ebi-a-GCST90001520	1858
rs10112702	8	127626066	G	C	0.2034	-0.2209	0.04185	1.464e-07	CD33+ HLA DR+ CD14dim Absolute Count || id:ebi-a-GCST90001520	1858
rs143612223	10	112429560	T	A	0.0005	3.383	0.6763	6.22702e-07	CD33+ HLA DR+ CD14dim Absolute Count || id:ebi-a-GCST90001520	1858
rs9548748	13	39950178	T	C	0.4774	0.1603	0.03302	1.30599e-06	CD33+ HLA DR+ CD14dim Absolute Count || id:ebi-a-GCST90001520	1858
rs11618675	13	49307675	A	G	0.025	0.4989	0.1078	3.94403e-06	CD33+ HLA DR+ CD14dim Absolute Count || id:ebi-a-GCST90001520	1858
rs7180375	15	79157379	C	T	0.4241	0.158	0.03442	4.72803e-06	CD33+ HLA DR+ CD14dim Absolute Count || id:ebi-a-GCST90001520	1858
rs74253876	18	5858361	T	C	0.2177	-0.2252	0.03955	1.45001e-08	CD33+ HLA DR+ CD14dim Absolute Count || id:ebi-a-GCST90001520	1858
rs113771439	18	5326964	A	G	0.2279	0.1922	0.03902	9.1199e-07	CD33+ HLA DR+ CD14dim Absolute Count || id:ebi-a-GCST90001520	1858
rs3865444	19	51727962	A	C	0.2131	-0.3278	0.03915	1.08493e-16	CD33+ HLA DR+ CD14dim Absolute Count || id:ebi-a-GCST90001520	1858
rs77594041	20	20080535	T	C	0.0065	0.9334	0.2001	3.31703e-06	CD33+ HLA DR+ CD14dim Absolute Count || id:ebi-a-GCST90001520	1858
rs187359230	2	35143865	A	G	0.0038	1.355	0.2671	4.31599e-07	CD33+ HLA DR+ CD14dim %CD33+ HLA DR+ || id:ebi-a-GCST90001521	1858
rs6544660	2	43688496	T	C	0.4451	0.1782	0.03421	2.08901e-07	CD33+ HLA DR+ CD14dim %CD33+ HLA DR+ || id:ebi-a-GCST90001521	1858
rs76092047	2	236068499	C	T	0.0277	-0.4851	0.1021	2.17601e-06	CD33+ HLA DR+ CD14dim %CD33+ HLA DR+ || id:ebi-a-GCST90001521	1858
rs182987179	3	41352496	G	T	0.0024	1.621	0.3364	1.54999e-06	CD33+ HLA DR+ CD14dim %CD33+ HLA DR+ || id:ebi-a-GCST90001521	1858
rs12655500	5	163124522	A	G	0.3251	0.173	0.03528	1.02901e-06	CD33+ HLA DR+ CD14dim %CD33+ HLA DR+ || id:ebi-a-GCST90001521	1858
rs111231787	5	112408670	T	C	0.0057	1.244	0.2236	3.04397e-08	CD33+ HLA DR+ CD14dim %CD33+ HLA DR+ || id:ebi-a-GCST90001521	1858
rs2982905	6	162155632	G	T	0.0705	0.3264	0.06501	5.62704e-07	CD33+ HLA DR+ CD14dim %CD33+ HLA DR+ || id:ebi-a-GCST90001521	1858
rs1504215	6	91006227	A	G	0.4249	0.1629	0.03418	2.01999e-06	CD33+ HLA DR+ CD14dim %CD33+ HLA DR+ || id:ebi-a-GCST90001521	1858
rs6951925	7	108801624	T	G	0.9058	-0.2597	0.0561	3.91904e-06	CD33+ HLA DR+ CD14dim %CD33+ HLA DR+ || id:ebi-a-GCST90001521	1858
rs138834110	8	5338183	A	T	0.0032	1.402	0.294	1.98198e-06	CD33+ HLA DR+ CD14dim %CD33+ HLA DR+ || id:ebi-a-GCST90001521	1858
rs2811828	9	17952241	C	T	0.4467	-0.1645	0.03348	9.81703e-07	CD33+ HLA DR+ CD14dim %CD33+ HLA DR+ || id:ebi-a-GCST90001521	1858
rs72719861	14	72634959	A	G	0.0086	-0.8814	0.1851	2.064e-06	CD33+ HLA DR+ CD14dim %CD33+ HLA DR+ || id:ebi-a-GCST90001521	1858
rs12933012	16	81880726	G	C	0.2317	0.1857	0.03951	2.78702e-06	CD33+ HLA DR+ CD14dim %CD33+ HLA DR+ || id:ebi-a-GCST90001521	1858
rs117734358	18	13088666	T	C	0.0156	0.6437	0.1354	2.13201e-06	CD33+ HLA DR+ CD14dim %CD33+ HLA DR+ || id:ebi-a-GCST90001521	1858
rs73030477	19	28098310	A	G	0.014	-0.7418	0.1619	4.917e-06	CD33+ HLA DR+ CD14dim %CD33+ HLA DR+ || id:ebi-a-GCST90001521	1858
rs59118111	1	4044791	C	G	0.0371	-0.4264	0.08487	5.56506e-07	CD33- HLA DR- Absolute Count || id:ebi-a-GCST90001522	1858
rs145308006	6	103221111	G	A	0.0102	-0.8101	0.1738	3.37303e-06	CD33- HLA DR- Absolute Count || id:ebi-a-GCST90001522	1858
rs2893591	7	105343363	A	G	0.1534	0.2146	0.04597	3.26099e-06	CD33- HLA DR- Absolute Count || id:ebi-a-GCST90001522	1858
rs12276131	11	4839164	A	G	0.5081	-0.1585	0.03347	2.34898e-06	CD33- HLA DR- Absolute Count || id:ebi-a-GCST90001522	1858
rs67418059	15	65664499	T	C	0.0562	0.3374	0.07164	2.66201e-06	CD33- HLA DR- Absolute Count || id:ebi-a-GCST90001522	1858
rs9916257	17	33797371	T	G	0.5737	-0.1904	0.03354	1.591e-08	CD33- HLA DR- Absolute Count || id:ebi-a-GCST90001522	1858
rs150206406	18	35502118	T	A	0.0135	0.6723	0.1447	3.61002e-06	CD33- HLA DR- Absolute Count || id:ebi-a-GCST90001522	1858
rs145540967	19	31193989	G	C	0.0038	-1.312	0.2783	2.60699e-06	CD33- HLA DR- Absolute Count || id:ebi-a-GCST90001522	1858
rs142340400	19	3958937	G	C	0.046	0.4225	0.08113	2.12799e-07	CD33- HLA DR- Absolute Count || id:ebi-a-GCST90001522	1858
rs1205315	19	54838294	G	A	0.3114	-0.1664	0.03605	4.19498e-06	CD33- HLA DR- Absolute Count || id:ebi-a-GCST90001522	1858
rs116851051	20	15544052	C	T	0.014	-0.648	0.1415	4.97096e-06	CD33- HLA DR- Absolute Count || id:ebi-a-GCST90001522	1858
rs11695642	2	43952695	T	G	0.4325	-0.1588	0.03437	4.10299e-06	CD33- HLA DR+ Absolute Count || id:ebi-a-GCST90001523	1858
rs17382372	2	136921761	A	G	0.2008	0.1961	0.04225	3.69301e-06	CD33- HLA DR+ Absolute Count || id:ebi-a-GCST90001523	1858
rs74940075	3	105338298	A	G	0.0011	-2.591	0.5601	3.98602e-06	CD33- HLA DR+ Absolute Count || id:ebi-a-GCST90001523	1858
rs78557978	4	115638601	C	G	0.0059	-1.079	0.2247	1.70298e-06	CD33- HLA DR+ Absolute Count || id:ebi-a-GCST90001523	1858
rs6841247	4	31899436	T	A	0.0786	0.2837	0.06096	3.498e-06	CD33- HLA DR+ Absolute Count || id:ebi-a-GCST90001523	1858
rs149034028	6	138310176	T	C	0.0258	-0.4903	0.104	2.59e-06	CD33- HLA DR+ Absolute Count || id:ebi-a-GCST90001523	1858
rs876036	7	50307710	C	T	0.2635	-0.2533	0.03729	1.48696e-11	CD33- HLA DR+ Absolute Count || id:ebi-a-GCST90001523	1858
rs2705609	7	3560919	T	G	0.2088	-0.2077	0.04099	4.46498e-07	CD33- HLA DR+ Absolute Count || id:ebi-a-GCST90001523	1858
rs140563508	9	140249209	T	C	0.0153	0.6759	0.1402	1.55199e-06	CD33- HLA DR+ Absolute Count || id:ebi-a-GCST90001523	1858
rs139348198	11	14699945	T	C	0.0113	-0.7561	0.16	2.464e-06	CD33- HLA DR+ Absolute Count || id:ebi-a-GCST90001523	1858
rs73023658	11	130596271	T	A	0.0105	0.7644	0.1634	3.09599e-06	CD33- HLA DR+ Absolute Count || id:ebi-a-GCST90001523	1858
rs3916927	13	103927135	A	G	0.2382	-0.1801	0.03841	2.96203e-06	CD33- HLA DR+ Absolute Count || id:ebi-a-GCST90001523	1858
rs118076832	15	52532599	G	C	0.0143	0.678	0.1447	2.986e-06	CD33- HLA DR+ Absolute Count || id:ebi-a-GCST90001523	1858
rs117117531	17	50899429	A	C	0.0032	-1.57	0.3215	1.13099e-06	CD33- HLA DR+ Absolute Count || id:ebi-a-GCST90001523	1858
rs116926801	17	65652250	T	C	0.021	-0.5549	0.1175	2.52098e-06	CD33- HLA DR+ Absolute Count || id:ebi-a-GCST90001523	1858
rs7207960	17	32010983	T	C	0.0977	0.2569	0.05557	4.05798e-06	CD33- HLA DR+ Absolute Count || id:ebi-a-GCST90001523	1858
rs140072356	19	41677568	A	G	0.0048	-1.079	0.2326	3.75699e-06	CD33- HLA DR+ Absolute Count || id:ebi-a-GCST90001523	1858
rs35720624	19	53014851	T	A	0.0721	-0.3009	0.0642	2.97701e-06	CD33- HLA DR+ Absolute Count || id:ebi-a-GCST90001523	1858
rs1697573	19	51718317	A	T	0.5191	-0.4103	0.03231	1.73101e-35	CD33- HLA DR+ Absolute Count || id:ebi-a-GCST90001523	1858
rs34318562	19	52180033	A	G	0.6889	-0.1942	0.03571	6.12802e-08	CD33- HLA DR+ Absolute Count || id:ebi-a-GCST90001523	1858
rs6074118	20	10283445	T	A	0.1792	-0.2049	0.04385	3.17103e-06	CD33- HLA DR+ Absolute Count || id:ebi-a-GCST90001523	1858
rs2070901	1	161185058	T	G	0.2874	0.1662	0.03467	1.754e-06	Granulocytic Myeloid-Derived Suppressor Cells Absolute Count || id:ebi-a-GCST90001524	1856
rs2017989	2	242099961	T	C	0.9801	-0.5272	0.11	1.79498e-06	Granulocytic Myeloid-Derived Suppressor Cells Absolute Count || id:ebi-a-GCST90001524	1856
rs111636975	2	176606506	G	A	0.0075	0.8776	0.18	1.17801e-06	Granulocytic Myeloid-Derived Suppressor Cells Absolute Count || id:ebi-a-GCST90001524	1856
rs2351156	2	50325488	C	T	0.9173	-0.271	0.05667	1.86299e-06	Granulocytic Myeloid-Derived Suppressor Cells Absolute Count || id:ebi-a-GCST90001524	1856
rs10872783	6	96696878	C	T	0.4278	0.1516	0.03215	2.58899e-06	Granulocytic Myeloid-Derived Suppressor Cells Absolute Count || id:ebi-a-GCST90001524	1856
rs72845259	10	132711992	A	G	0.0019	1.784	0.3546	5.34097e-07	Granulocytic Myeloid-Derived Suppressor Cells Absolute Count || id:ebi-a-GCST90001524	1856
rs78384212	14	60291874	T	C	0.0523	0.3493	0.07136	1.071e-06	Granulocytic Myeloid-Derived Suppressor Cells Absolute Count || id:ebi-a-GCST90001524	1856
rs8098513	18	67052180	G	A	0.2163	0.1797	0.03822	2.75702e-06	Granulocytic Myeloid-Derived Suppressor Cells Absolute Count || id:ebi-a-GCST90001524	1856
rs655539	18	54281790	C	T	0.1266	-0.2198	0.04712	3.31299e-06	Granulocytic Myeloid-Derived Suppressor Cells Absolute Count || id:ebi-a-GCST90001524	1856
rs3865444	19	51727962	A	C	0.2128	-0.2687	0.03761	1.28499e-12	Granulocytic Myeloid-Derived Suppressor Cells Absolute Count || id:ebi-a-GCST90001524	1856
rs16988872	19	51580161	T	C	0.2659	-0.2007	0.03572	2.20399e-08	Granulocytic Myeloid-Derived Suppressor Cells Absolute Count || id:ebi-a-GCST90001524	1856
rs1801274	1	161479745	G	A	0.3334	0.2617	0.03479	8.34065e-14	CD33dim HLA DR+ CD11b+ Absolute Count || id:ebi-a-GCST90001525	1858
rs4606283	1	227581017	T	C	0.7274	0.1686	0.03672	4.71205e-06	CD33dim HLA DR+ CD11b+ Absolute Count || id:ebi-a-GCST90001525	1858
rs143383466	3	196068066	T	C	0.0043	1.142	0.2466	3.90499e-06	CD33dim HLA DR+ CD11b+ Absolute Count || id:ebi-a-GCST90001525	1858
rs71596080	4	82676237	C	T	0.0826	0.2853	0.0584	1.12001e-06	CD33dim HLA DR+ CD11b+ Absolute Count || id:ebi-a-GCST90001525	1858
rs10025005	4	181288587	T	G	0.7764	0.1934	0.03857	5.85706e-07	CD33dim HLA DR+ CD11b+ Absolute Count || id:ebi-a-GCST90001525	1858
rs10011663	4	190338080	G	A	0.2411	0.1837	0.03783	1.29799e-06	CD33dim HLA DR+ CD11b+ Absolute Count || id:ebi-a-GCST90001525	1858
rs78173101	5	148830537	G	C	0.0167	-0.5888	0.1268	3.68502e-06	CD33dim HLA DR+ CD11b+ Absolute Count || id:ebi-a-GCST90001525	1858
rs62362950	5	83003910	T	C	0.0597	-0.3383	0.0679	6.87005e-07	CD33dim HLA DR+ CD11b+ Absolute Count || id:ebi-a-GCST90001525	1858
rs74851637	5	144893255	T	G	0.0091	0.8135	0.1725	2.60597e-06	CD33dim HLA DR+ CD11b+ Absolute Count || id:ebi-a-GCST90001525	1858
rs17721845	6	149234718	T	C	0.2511	0.1862	0.03754	7.67892e-07	CD33dim HLA DR+ CD11b+ Absolute Count || id:ebi-a-GCST90001525	1858
rs73716755	7	116308013	C	G	0.0455	-0.3748	0.078	1.67598e-06	CD33dim HLA DR+ CD11b+ Absolute Count || id:ebi-a-GCST90001525	1858
rs144894656	9	118222268	C	A	0.0094	-0.7728	0.1667	3.77998e-06	CD33dim HLA DR+ CD11b+ Absolute Count || id:ebi-a-GCST90001525	1858
rs11594395	10	2817998	G	C	0.024	0.514	0.1111	3.94403e-06	CD33dim HLA DR+ CD11b+ Absolute Count || id:ebi-a-GCST90001525	1858
rs192715019	12	83087530	T	C	0.0277	-0.5266	0.09953	1.36301e-07	CD33dim HLA DR+ CD11b+ Absolute Count || id:ebi-a-GCST90001525	1858
rs74638799	12	11652069	G	A	0.0797	0.2768	0.05971	3.81303e-06	CD33dim HLA DR+ CD11b+ Absolute Count || id:ebi-a-GCST90001525	1858
rs9524403	13	94940936	C	T	0.0057	1.043	0.2214	2.65601e-06	CD33dim HLA DR+ CD11b+ Absolute Count || id:ebi-a-GCST90001525	1858
rs9510371	13	23410009	T	C	0.158	0.2146	0.04513	2.133e-06	CD33dim HLA DR+ CD11b+ Absolute Count || id:ebi-a-GCST90001525	1858
rs141080550	13	111287945	A	G	0.0307	0.4746	0.09273	3.40997e-07	CD33dim HLA DR+ CD11b+ Absolute Count || id:ebi-a-GCST90001525	1858
rs11631677	15	86647805	T	C	0.5509	-0.1627	0.03297	8.79205e-07	CD33dim HLA DR+ CD11b+ Absolute Count || id:ebi-a-GCST90001525	1858
rs145231100	18	33141890	A	G	0.0137	-0.6579	0.1354	1.28399e-06	CD33dim HLA DR+ CD11b+ Absolute Count || id:ebi-a-GCST90001525	1858
rs76640602	22	39737217	A	G	0.0202	0.5875	0.1154	3.94503e-07	CD33dim HLA DR+ CD11b+ Absolute Count || id:ebi-a-GCST90001525	1858
rs3820097	1	161049358	A	G	0.9459	-0.4313	0.07416	7.10608e-09	CD33dim HLA DR+ CD11b+ %CD33dim HLA DR+ || id:ebi-a-GCST90001526	1858
rs1801274	1	161479745	G	A	0.3334	0.5511	0.03437	2.76822e-54	CD33dim HLA DR+ CD11b+ %CD33dim HLA DR+ || id:ebi-a-GCST90001526	1858
rs35006063	1	105261254	T	C	0.0073	-0.9307	0.1901	1.06601e-06	CD33dim HLA DR+ CD11b+ %CD33dim HLA DR+ || id:ebi-a-GCST90001526	1858
rs75239369	2	180132004	G	A	0.0439	-0.3897	0.08076	1.51401e-06	CD33dim HLA DR+ CD11b+ %CD33dim HLA DR+ || id:ebi-a-GCST90001526	1858
rs139393711	3	113287778	G	C	0.0355	-0.4467	0.09624	3.69598e-06	CD33dim HLA DR+ CD11b+ %CD33dim HLA DR+ || id:ebi-a-GCST90001526	1858
rs263715	3	6504785	A	G	0.0237	-0.5334	0.1126	2.33701e-06	CD33dim HLA DR+ CD11b+ %CD33dim HLA DR+ || id:ebi-a-GCST90001526	1858
rs6820873	4	31077545	C	A	0.4255	-0.1689	0.03421	8.65107e-07	CD33dim HLA DR+ CD11b+ %CD33dim HLA DR+ || id:ebi-a-GCST90001526	1858
rs115483539	5	50273359	A	G	0.053	-0.3509	0.07502	3.11903e-06	CD33dim HLA DR+ CD11b+ %CD33dim HLA DR+ || id:ebi-a-GCST90001526	1858
rs7754966	6	151449284	T	A	0.292	0.1728	0.03744	4.20301e-06	CD33dim HLA DR+ CD11b+ %CD33dim HLA DR+ || id:ebi-a-GCST90001526	1858
rs4641163	9	130194536	C	G	0.5353	0.1619	0.03385	1.854e-06	CD33dim HLA DR+ CD11b+ %CD33dim HLA DR+ || id:ebi-a-GCST90001526	1858
[truncated: 9,864 more rows]

## Sheet: Supplement Table2
Supplement Table 2 MR analysis results of 731 Plasma Immune Cells with OS in Stage III CRC Patients
id.exposure	id.outcome	exposure	method	nsnp	b	se	pval
ebi-a-GCST90001391	OS in Stage III CRC Patients	IgD+ B cell %B cell || id:ebi-a-GCST90001391	Inverse variance weighted	4	-0.1236	0.456821	0.786726
ebi-a-GCST90001391	OS in Stage III CRC Patients	IgD+ B cell %B cell || id:ebi-a-GCST90001391	MR Egger	4	0.213709	0.771552	0.807793
ebi-a-GCST90001391	OS in Stage III CRC Patients	IgD+ B cell %B cell || id:ebi-a-GCST90001391	Constrained maximum likelihood	4	-0.212366	0.49358	0.667009
ebi-a-GCST90001391	OS in Stage III CRC Patients	IgD+ B cell %B cell || id:ebi-a-GCST90001391	Robust adjusted profile score (RAPS)	4	-0.124674	0.499175	0.802773
ebi-a-GCST90001391	OS in Stage III CRC Patients	IgD+ B cell %B cell || id:ebi-a-GCST90001391	Bayesian Weighted Mendelian Randomization	4	-0.152671	0.514417	0.766631
ebi-a-GCST90001392	OS in Stage III CRC Patients	IgD+ CD38+ B cell Absolute Count || id:ebi-a-GCST90001392	Inverse variance weighted	8	0.134536	0.528655	0.79912
ebi-a-GCST90001392	OS in Stage III CRC Patients	IgD+ CD38+ B cell Absolute Count || id:ebi-a-GCST90001392	MR Egger	8	-0.299049	2.4178	0.905603
ebi-a-GCST90001392	OS in Stage III CRC Patients	IgD+ CD38+ B cell Absolute Count || id:ebi-a-GCST90001392	Constrained maximum likelihood	8	0.162111	0.620099	0.793763
ebi-a-GCST90001392	OS in Stage III CRC Patients	IgD+ CD38+ B cell Absolute Count || id:ebi-a-GCST90001392	Robust adjusted profile score (RAPS)	8	0.164498	0.56994	0.772869
ebi-a-GCST90001392	OS in Stage III CRC Patients	IgD+ CD38+ B cell Absolute Count || id:ebi-a-GCST90001392	Bayesian Weighted Mendelian Randomization	8	0.140008	0.550856	0.799368
ebi-a-GCST90001393	OS in Stage III CRC Patients	IgD+ CD38dim B cell %B cell || id:ebi-a-GCST90001393	Inverse variance weighted	5	0.70128	0.981466	0.474904
ebi-a-GCST90001393	OS in Stage III CRC Patients	IgD+ CD38dim B cell %B cell || id:ebi-a-GCST90001393	MR Egger	5	2.35767	8.99638	0.810233
ebi-a-GCST90001393	OS in Stage III CRC Patients	IgD+ CD38dim B cell %B cell || id:ebi-a-GCST90001393	Constrained maximum likelihood	5	0.174932	0.891578	0.84445
ebi-a-GCST90001393	OS in Stage III CRC Patients	IgD+ CD38dim B cell %B cell || id:ebi-a-GCST90001393	Robust adjusted profile score (RAPS)	5	0.435439	0.849699	0.608327
ebi-a-GCST90001393	OS in Stage III CRC Patients	IgD+ CD38dim B cell %B cell || id:ebi-a-GCST90001393	Bayesian Weighted Mendelian Randomization	5	0.744445	1.03616	0.472472
ebi-a-GCST90001394	OS in Stage III CRC Patients	IgD+ CD38dim B cell Absolute Count || id:ebi-a-GCST90001394	Inverse variance weighted	5	-0.00967114	0.773948	0.99003
ebi-a-GCST90001394	OS in Stage III CRC Patients	IgD+ CD38dim B cell Absolute Count || id:ebi-a-GCST90001394	MR Egger	5	-3.97122	2.78767	0.249492
ebi-a-GCST90001394	OS in Stage III CRC Patients	IgD+ CD38dim B cell Absolute Count || id:ebi-a-GCST90001394	Constrained maximum likelihood	5	-0.0513547	0.782304	0.94766
ebi-a-GCST90001394	OS in Stage III CRC Patients	IgD+ CD38dim B cell Absolute Count || id:ebi-a-GCST90001394	Robust adjusted profile score (RAPS)	5	-0.163306	0.749996	0.82763
ebi-a-GCST90001394	OS in Stage III CRC Patients	IgD+ CD38dim B cell Absolute Count || id:ebi-a-GCST90001394	Bayesian Weighted Mendelian Randomization	5	-0.130023	0.857785	0.879518
ebi-a-GCST90001395	OS in Stage III CRC Patients	IgD+ CD38- B cell %B cell || id:ebi-a-GCST90001395	Inverse variance weighted	2	0.154229	0.979838	0.874927
ebi-a-GCST90001395	OS in Stage III CRC Patients	IgD+ CD38- B cell %B cell || id:ebi-a-GCST90001395	Constrained maximum likelihood	2	0.147781	1.05056	0.888131
ebi-a-GCST90001395	OS in Stage III CRC Patients	IgD+ CD38- B cell %B cell || id:ebi-a-GCST90001395	Robust adjusted profile score (RAPS)	2	0.155659	1.07162	0.884509
ebi-a-GCST90001395	OS in Stage III CRC Patients	IgD+ CD38- B cell %B cell || id:ebi-a-GCST90001395	Bayesian Weighted Mendelian Randomization	2	0.180992	1.03992	0.86183
ebi-a-GCST90001396	OS in Stage III CRC Patients	IgD+ CD38- B cell Absolute Count || id:ebi-a-GCST90001396	Inverse variance weighted	3	1.80075	0.791765	0.022945
ebi-a-GCST90001396	OS in Stage III CRC Patients	IgD+ CD38- B cell Absolute Count || id:ebi-a-GCST90001396	MR Egger	3	5.45689	4.50391	0.439277
ebi-a-GCST90001396	OS in Stage III CRC Patients	IgD+ CD38- B cell Absolute Count || id:ebi-a-GCST90001396	Constrained maximum likelihood	3	1.83824	0.83287	0.0273062
ebi-a-GCST90001396	OS in Stage III CRC Patients	IgD+ CD38- B cell Absolute Count || id:ebi-a-GCST90001396	Robust adjusted profile score (RAPS)	3	1.80523	0.900391	0.0449689
ebi-a-GCST90001396	OS in Stage III CRC Patients	IgD+ CD38- B cell Absolute Count || id:ebi-a-GCST90001396	Bayesian Weighted Mendelian Randomization	3	1.8334	0.856094	0.0322264
ebi-a-GCST90001397	OS in Stage III CRC Patients	Unswitched memory B cell %B cell || id:ebi-a-GCST90001397	Inverse variance weighted	8	0.00968941	0.519039	0.985106
ebi-a-GCST90001397	OS in Stage III CRC Patients	Unswitched memory B cell %B cell || id:ebi-a-GCST90001397	MR Egger	8	1.03372	1.9998	0.623712
ebi-a-GCST90001397	OS in Stage III CRC Patients	Unswitched memory B cell %B cell || id:ebi-a-GCST90001397	Constrained maximum likelihood	8	-0.020319	0.586509	0.972364
ebi-a-GCST90001397	OS in Stage III CRC Patients	Unswitched memory B cell %B cell || id:ebi-a-GCST90001397	Robust adjusted profile score (RAPS)	8	0.0398342	0.563365	0.94363
ebi-a-GCST90001397	OS in Stage III CRC Patients	Unswitched memory B cell %B cell || id:ebi-a-GCST90001397	Bayesian Weighted Mendelian Randomization	8	0.00372882	0.546799	0.994559
ebi-a-GCST90001398	OS in Stage III CRC Patients	Unswitched memory B cell Absolute Count || id:ebi-a-GCST90001398	Inverse variance weighted	5	0.175241	0.677891	0.796014
ebi-a-GCST90001398	OS in Stage III CRC Patients	Unswitched memory B cell Absolute Count || id:ebi-a-GCST90001398	MR Egger	5	0.0101236	2.5676	0.997102
ebi-a-GCST90001398	OS in Stage III CRC Patients	Unswitched memory B cell Absolute Count || id:ebi-a-GCST90001398	Constrained maximum likelihood	5	0.155178	0.774386	0.841177
ebi-a-GCST90001398	OS in Stage III CRC Patients	Unswitched memory B cell Absolute Count || id:ebi-a-GCST90001398	Robust adjusted profile score (RAPS)	5	0.138197	0.733146	0.850485
ebi-a-GCST90001398	OS in Stage III CRC Patients	Unswitched memory B cell Absolute Count || id:ebi-a-GCST90001398	Bayesian Weighted Mendelian Randomization	5	0.176726	0.727249	0.808
ebi-a-GCST90001399	OS in Stage III CRC Patients	IgD- CD27- B cell %B cell || id:ebi-a-GCST90001399	Inverse variance weighted	5	0.351264	0.410544	0.392216
ebi-a-GCST90001399	OS in Stage III CRC Patients	IgD- CD27- B cell %B cell || id:ebi-a-GCST90001399	MR Egger	5	0.898286	0.865769	0.375762
ebi-a-GCST90001399	OS in Stage III CRC Patients	IgD- CD27- B cell %B cell || id:ebi-a-GCST90001399	Constrained maximum likelihood	5	0.353466	0.432178	0.413431
ebi-a-GCST90001399	OS in Stage III CRC Patients	IgD- CD27- B cell %B cell || id:ebi-a-GCST90001399	Robust adjusted profile score (RAPS)	5	0.390765	0.429777	0.363231
ebi-a-GCST90001399	OS in Stage III CRC Patients	IgD- CD27- B cell %B cell || id:ebi-a-GCST90001399	Bayesian Weighted Mendelian Randomization	5	0.361684	0.435938	0.406726
ebi-a-GCST90001400	OS in Stage III CRC Patients	IgD+ B cell Absolute Count || id:ebi-a-GCST90001400	Inverse variance weighted	6	0.110379	0.592259	0.852156
ebi-a-GCST90001400	OS in Stage III CRC Patients	IgD+ B cell Absolute Count || id:ebi-a-GCST90001400	MR Egger	6	-1.08835	1.81232	0.580521
ebi-a-GCST90001400	OS in Stage III CRC Patients	IgD+ B cell Absolute Count || id:ebi-a-GCST90001400	Constrained maximum likelihood	6	0.130572	0.591911	0.825409
ebi-a-GCST90001400	OS in Stage III CRC Patients	IgD+ B cell Absolute Count || id:ebi-a-GCST90001400	Robust adjusted profile score (RAPS)	6	0.111978	0.643393	0.861832
ebi-a-GCST90001400	OS in Stage III CRC Patients	IgD+ B cell Absolute Count || id:ebi-a-GCST90001400	Bayesian Weighted Mendelian Randomization	6	0.123004	0.621101	0.843013
ebi-a-GCST90001401	OS in Stage III CRC Patients	IgD- CD27- B cell Absolute Count || id:ebi-a-GCST90001401	Inverse variance weighted	5	0.489567	0.488824	0.316576
ebi-a-GCST90001401	OS in Stage III CRC Patients	IgD- CD27- B cell Absolute Count || id:ebi-a-GCST90001401	MR Egger	5	1.12246	1.87749	0.592063
ebi-a-GCST90001401	OS in Stage III CRC Patients	IgD- CD27- B cell Absolute Count || id:ebi-a-GCST90001401	Constrained maximum likelihood	5	0.502576	0.509505	0.323937
ebi-a-GCST90001401	OS in Stage III CRC Patients	IgD- CD27- B cell Absolute Count || id:ebi-a-GCST90001401	Robust adjusted profile score (RAPS)	5	0.500426	0.518057	0.334061
ebi-a-GCST90001401	OS in Stage III CRC Patients	IgD- CD27- B cell Absolute Count || id:ebi-a-GCST90001401	Bayesian Weighted Mendelian Randomization	5	0.512621	0.508465	0.313372
ebi-a-GCST90001402	OS in Stage III CRC Patients	Switched memory B cell %B cell || id:ebi-a-GCST90001402	Inverse variance weighted	4	-0.397697	0.476831	0.404258
ebi-a-GCST90001402	OS in Stage III CRC Patients	Switched memory B cell %B cell || id:ebi-a-GCST90001402	MR Egger	4	0.00904106	0.937447	0.993181
ebi-a-GCST90001402	OS in Stage III CRC Patients	Switched memory B cell %B cell || id:ebi-a-GCST90001402	Constrained maximum likelihood	4	-0.373867	0.539491	0.48831
ebi-a-GCST90001402	OS in Stage III CRC Patients	Switched memory B cell %B cell || id:ebi-a-GCST90001402	Robust adjusted profile score (RAPS)	4	-0.374697	0.511344	0.463699
ebi-a-GCST90001402	OS in Stage III CRC Patients	Switched memory B cell %B cell || id:ebi-a-GCST90001402	Bayesian Weighted Mendelian Randomization	4	-0.505538	0.5498	0.357837
ebi-a-GCST90001403	OS in Stage III CRC Patients	Switched memory B cell Absolute Count || id:ebi-a-GCST90001403	Inverse variance weighted	5	0.124296	0.645399	0.847282
ebi-a-GCST90001403	OS in Stage III CRC Patients	Switched memory B cell Absolute Count || id:ebi-a-GCST90001403	MR Egger	5	-8.77126	9.34487	0.417171
ebi-a-GCST90001403	OS in Stage III CRC Patients	Switched memory B cell Absolute Count || id:ebi-a-GCST90001403	Constrained maximum likelihood	5	0.100534	0.676947	0.88194
ebi-a-GCST90001403	OS in Stage III CRC Patients	Switched memory B cell Absolute Count || id:ebi-a-GCST90001403	Robust adjusted profile score (RAPS)	5	0.126591	0.697571	0.855995
ebi-a-GCST90001403	OS in Stage III CRC Patients	Switched memory B cell Absolute Count || id:ebi-a-GCST90001403	Bayesian Weighted Mendelian Randomization	5	0.13079	0.672351	0.845763
ebi-a-GCST90001404	OS in Stage III CRC Patients	Plasma Blast-Plasma Cell %B cell || id:ebi-a-GCST90001404	Inverse variance weighted	3	0.472218	0.873099	0.588609
ebi-a-GCST90001404	OS in Stage III CRC Patients	Plasma Blast-Plasma Cell %B cell || id:ebi-a-GCST90001404	MR Egger	3	7.66031	10.12	0.587512
ebi-a-GCST90001404	OS in Stage III CRC Patients	Plasma Blast-Plasma Cell %B cell || id:ebi-a-GCST90001404	Constrained maximum likelihood	3	0.54748	0.866946	0.527711
ebi-a-GCST90001404	OS in Stage III CRC Patients	Plasma Blast-Plasma Cell %B cell || id:ebi-a-GCST90001404	Robust adjusted profile score (RAPS)	3	0.478692	0.948134	0.613644
ebi-a-GCST90001404	OS in Stage III CRC Patients	Plasma Blast-Plasma Cell %B cell || id:ebi-a-GCST90001404	Bayesian Weighted Mendelian Randomization	3	0.475342	0.915229	0.603503
ebi-a-GCST90001405	OS in Stage III CRC Patients	Plasma Blast-Plasma Cell Absolute Count || id:ebi-a-GCST90001405	Inverse variance weighted	3	-1.09142	0.884489	0.217221
ebi-a-GCST90001405	OS in Stage III CRC Patients	Plasma Blast-Plasma Cell Absolute Count || id:ebi-a-GCST90001405	MR Egger	3	-5.40692	4.77402	0.460475
ebi-a-GCST90001405	OS in Stage III CRC Patients	Plasma Blast-Plasma Cell Absolute Count || id:ebi-a-GCST90001405	Constrained maximum likelihood	3	-0.931003	1.00641	0.354928
ebi-a-GCST90001405	OS in Stage III CRC Patients	Plasma Blast-Plasma Cell Absolute Count || id:ebi-a-GCST90001405	Robust adjusted profile score (RAPS)	3	-1.10595	0.976192	0.257249
ebi-a-GCST90001405	OS in Stage III CRC Patients	Plasma Blast-Plasma Cell Absolute Count || id:ebi-a-GCST90001405	Bayesian Weighted Mendelian Randomization	3	-1.11395	0.943206	0.237592
ebi-a-GCST90001406	OS in Stage III CRC Patients	Memory B cell %B cell || id:ebi-a-GCST90001406	Inverse variance weighted	7	0.139405	0.479863	0.771427
ebi-a-GCST90001406	OS in Stage III CRC Patients	Memory B cell %B cell || id:ebi-a-GCST90001406	MR Egger	7	-1.87554	2.91188	0.547889
ebi-a-GCST90001406	OS in Stage III CRC Patients	Memory B cell %B cell || id:ebi-a-GCST90001406	Constrained maximum likelihood	7	0.15953	0.492142	0.745821
ebi-a-GCST90001406	OS in Stage III CRC Patients	Memory B cell %B cell || id:ebi-a-GCST90001406	Robust adjusted profile score (RAPS)	7	0.14145	0.520438	0.785783
ebi-a-GCST90001406	OS in Stage III CRC Patients	Memory B cell %B cell || id:ebi-a-GCST90001406	Bayesian Weighted Mendelian Randomization	7	0.148898	0.498541	0.765193
ebi-a-GCST90001407	OS in Stage III CRC Patients	Memory B cell Absolute Count || id:ebi-a-GCST90001407	Inverse variance weighted	2	1.12872	1.11124	0.309758
ebi-a-GCST90001407	OS in Stage III CRC Patients	Memory B cell Absolute Count || id:ebi-a-GCST90001407	Constrained maximum likelihood	2	1.28796	1.17022	0.271064
ebi-a-GCST90001407	OS in Stage III CRC Patients	Memory B cell Absolute Count || id:ebi-a-GCST90001407	Robust adjusted profile score (RAPS)	2	1.13931	1.23378	0.355781
ebi-a-GCST90001407	OS in Stage III CRC Patients	Memory B cell Absolute Count || id:ebi-a-GCST90001407	Bayesian Weighted Mendelian Randomization	2	1.16438	1.18836	0.327176
ebi-a-GCST90001408	OS in Stage III CRC Patients	Naive-mature B cell %B cell || id:ebi-a-GCST90001408	Inverse variance weighted	9	0.0661026	0.445263	0.881982
ebi-a-GCST90001408	OS in Stage III CRC Patients	Naive-mature B cell %B cell || id:ebi-a-GCST90001408	MR Egger	9	0.577407	2.13269	0.794399
ebi-a-GCST90001408	OS in Stage III CRC Patients	Naive-mature B cell %B cell || id:ebi-a-GCST90001408	Constrained maximum likelihood	9	0.0686038	0.503204	0.891557
ebi-a-GCST90001408	OS in Stage III CRC Patients	Naive-mature B cell %B cell || id:ebi-a-GCST90001408	Robust adjusted profile score (RAPS)	9	0.0199071	0.48056	0.966957
ebi-a-GCST90001408	OS in Stage III CRC Patients	Naive-mature B cell %B cell || id:ebi-a-GCST90001408	Bayesian Weighted Mendelian Randomization	9	0.0641539	0.466244	0.890559
ebi-a-GCST90001409	OS in Stage III CRC Patients	Naive-mature B cell Absolute Count || id:ebi-a-GCST90001409	Inverse variance weighted	7	-0.0253905	0.506367	0.960009
ebi-a-GCST90001409	OS in Stage III CRC Patients	Naive-mature B cell Absolute Count || id:ebi-a-GCST90001409	MR Egger	7	-2.06809	1.71943	0.282905
ebi-a-GCST90001409	OS in Stage III CRC Patients	Naive-mature B cell Absolute Count || id:ebi-a-GCST90001409	Constrained maximum likelihood	7	-0.0379605	0.580636	0.947873
ebi-a-GCST90001409	OS in Stage III CRC Patients	Naive-mature B cell Absolute Count || id:ebi-a-GCST90001409	Robust adjusted profile score (RAPS)	7	-0.0261842	0.546975	0.961819
ebi-a-GCST90001409	OS in Stage III CRC Patients	Naive-mature B cell Absolute Count || id:ebi-a-GCST90001409	Bayesian Weighted Mendelian Randomization	7	-0.00420325	0.539103	0.993779
ebi-a-GCST90001410	OS in Stage III CRC Patients	IgD- CD38+ B cell %B cell || id:ebi-a-GCST90001410	Inverse variance weighted	6	0.180094	0.618245	0.770823
ebi-a-GCST90001410	OS in Stage III CRC Patients	IgD- CD38+ B cell %B cell || id:ebi-a-GCST90001410	MR Egger	6	0.267472	4.82285	0.958432
ebi-a-GCST90001410	OS in Stage III CRC Patients	IgD- CD38+ B cell %B cell || id:ebi-a-GCST90001410	Constrained maximum likelihood	6	0.179093	0.672974	0.790146
ebi-a-GCST90001410	OS in Stage III CRC Patients	IgD- CD38+ B cell %B cell || id:ebi-a-GCST90001410	Robust adjusted profile score (RAPS)	6	0.247228	0.659325	0.707682
ebi-a-GCST90001410	OS in Stage III CRC Patients	IgD- CD38+ B cell %B cell || id:ebi-a-GCST90001410	Bayesian Weighted Mendelian Randomization	6	0.183465	0.682476	0.788066
ebi-a-GCST90001411	OS in Stage III CRC Patients	IgD+ CD24+ B cell %B cell || id:ebi-a-GCST90001411	Inverse variance weighted	3	0.206529	0.852595	0.808598
ebi-a-GCST90001411	OS in Stage III CRC Patients	IgD+ CD24+ B cell %B cell || id:ebi-a-GCST90001411	MR Egger	3	11.4346	17.1397	0.625456
ebi-a-GCST90001411	OS in Stage III CRC Patients	IgD+ CD24+ B cell %B cell || id:ebi-a-GCST90001411	Constrained maximum likelihood	3	0.304734	0.869499	0.725986
ebi-a-GCST90001411	OS in Stage III CRC Patients	IgD+ CD24+ B cell %B cell || id:ebi-a-GCST90001411	Robust adjusted profile score (RAPS)	3	0.209004	0.932042	0.822568
ebi-a-GCST90001411	OS in Stage III CRC Patients	IgD+ CD24+ B cell %B cell || id:ebi-a-GCST90001411	Bayesian Weighted Mendelian Randomization	3	0.212248	0.894165	0.81237
ebi-a-GCST90001412	OS in Stage III CRC Patients	IgD+ CD24+ B cell Absolute Count || id:ebi-a-GCST90001412	Inverse variance weighted	5	0.806659	0.777347	0.299406
ebi-a-GCST90001412	OS in Stage III CRC Patients	IgD+ CD24+ B cell Absolute Count || id:ebi-a-GCST90001412	MR Egger	5	-5.52909	3.18679	0.181148
ebi-a-GCST90001412	OS in Stage III CRC Patients	IgD+ CD24+ B cell Absolute Count || id:ebi-a-GCST90001412	Constrained maximum likelihood	5	0.754943	0.816142	0.354958
ebi-a-GCST90001412	OS in Stage III CRC Patients	IgD+ CD24+ B cell Absolute Count || id:ebi-a-GCST90001412	Robust adjusted profile score (RAPS)	5	0.751246	0.790478	0.341925
ebi-a-GCST90001412	OS in Stage III CRC Patients	IgD+ CD24+ B cell Absolute Count || id:ebi-a-GCST90001412	Bayesian Weighted Mendelian Randomization	5	0.821791	0.817317	0.314669
ebi-a-GCST90001413	OS in Stage III CRC Patients	IgD- CD24- B cell %B cell || id:ebi-a-GCST90001413	Inverse variance weighted	3	-0.236915	0.705699	0.737084
ebi-a-GCST90001413	OS in Stage III CRC Patients	IgD- CD24- B cell %B cell || id:ebi-a-GCST90001413	MR Egger	3	3.11235	3.30553	0.519156
ebi-a-GCST90001413	OS in Stage III CRC Patients	IgD- CD24- B cell %B cell || id:ebi-a-GCST90001413	Constrained maximum likelihood	3	-0.324995	0.730452	0.656376
ebi-a-GCST90001413	OS in Stage III CRC Patients	IgD- CD24- B cell %B cell || id:ebi-a-GCST90001413	Robust adjusted profile score (RAPS)	3	-0.242284	0.759914	0.749854
ebi-a-GCST90001413	OS in Stage III CRC Patients	IgD- CD24- B cell %B cell || id:ebi-a-GCST90001413	Bayesian Weighted Mendelian Randomization	3	-0.195435	0.788815	0.804322
ebi-a-GCST90001414	OS in Stage III CRC Patients	IgD- CD24- B cell Absolute Count || id:ebi-a-GCST90001414	Inverse variance weighted	5	-0.353135	0.6338	0.57741
ebi-a-GCST90001414	OS in Stage III CRC Patients	IgD- CD24- B cell Absolute Count || id:ebi-a-GCST90001414	MR Egger	5	-2.62012	2.99212	0.445666
ebi-a-GCST90001414	OS in Stage III CRC Patients	IgD- CD24- B cell Absolute Count || id:ebi-a-GCST90001414	Constrained maximum likelihood	5	-0.340127	0.720882	0.637055
ebi-a-GCST90001414	OS in Stage III CRC Patients	IgD- CD24- B cell Absolute Count || id:ebi-a-GCST90001414	Robust adjusted profile score (RAPS)	5	-0.361487	0.688711	0.599671
ebi-a-GCST90001414	OS in Stage III CRC Patients	IgD- CD24- B cell Absolute Count || id:ebi-a-GCST90001414	Bayesian Weighted Mendelian Randomization	5	-0.350647	0.669195	0.60029
ebi-a-GCST90001415	OS in Stage III CRC Patients	IgD+ CD24- B cell %B cell || id:ebi-a-GCST90001415	Inverse variance weighted	3	-1.38473	1.09936	0.207819
ebi-a-GCST90001415	OS in Stage III CRC Patients	IgD+ CD24- B cell %B cell || id:ebi-a-GCST90001415	MR Egger	3	-5.49052	8.36801	0.630332
ebi-a-GCST90001415	OS in Stage III CRC Patients	IgD+ CD24- B cell %B cell || id:ebi-a-GCST90001415	Constrained maximum likelihood	3	-1.43508	0.881943	0.103698
ebi-a-GCST90001415	OS in Stage III CRC Patients	IgD+ CD24- B cell %B cell || id:ebi-a-GCST90001415	Robust adjusted profile score (RAPS)	3	-1.53255	1.02223	0.133817
ebi-a-GCST90001415	OS in Stage III CRC Patients	IgD+ CD24- B cell %B cell || id:ebi-a-GCST90001415	Bayesian Weighted Mendelian Randomization	3	-1.59231	1.17656	0.175942
ebi-a-GCST90001416	OS in Stage III CRC Patients	IgD+ CD24- B cell Absolute Count || id:ebi-a-GCST90001416	Inverse variance weighted	6	-0.285599	0.612967	0.641267
ebi-a-GCST90001416	OS in Stage III CRC Patients	IgD+ CD24- B cell Absolute Count || id:ebi-a-GCST90001416	MR Egger	6	-0.0329222	2.03444	0.987864
ebi-a-GCST90001416	OS in Stage III CRC Patients	IgD+ CD24- B cell Absolute Count || id:ebi-a-GCST90001416	Constrained maximum likelihood	6	-0.231047	0.653966	0.723863
ebi-a-GCST90001416	OS in Stage III CRC Patients	IgD+ CD24- B cell Absolute Count || id:ebi-a-GCST90001416	Robust adjusted profile score (RAPS)	6	-0.289727	0.669007	0.664964
ebi-a-GCST90001416	OS in Stage III CRC Patients	IgD+ CD24- B cell Absolute Count || id:ebi-a-GCST90001416	Bayesian Weighted Mendelian Randomization	6	-0.299472	0.645205	0.642541
ebi-a-GCST90001417	OS in Stage III CRC Patients	CD24+ CD27+ B cell %B cell || id:ebi-a-GCST90001417	Inverse variance weighted	4	-0.19389	0.685847	0.777405
ebi-a-GCST90001417	OS in Stage III CRC Patients	CD24+ CD27+ B cell %B cell || id:ebi-a-GCST90001417	MR Egger	4	-0.661108	3.68351	0.8741
ebi-a-GCST90001417	OS in Stage III CRC Patients	CD24+ CD27+ B cell %B cell || id:ebi-a-GCST90001417	Constrained maximum likelihood	4	-0.229032	0.680285	0.736365
ebi-a-GCST90001417	OS in Stage III CRC Patients	CD24+ CD27+ B cell %B cell || id:ebi-a-GCST90001417	Robust adjusted profile score (RAPS)	4	-0.194576	0.750401	0.795407
ebi-a-GCST90001417	OS in Stage III CRC Patients	CD24+ CD27+ B cell %B cell || id:ebi-a-GCST90001417	Bayesian Weighted Mendelian Randomization	4	-0.194884	0.712369	0.784413
ebi-a-GCST90001418	OS in Stage III CRC Patients	CD24+ CD27+ B cell Absolute Count || id:ebi-a-GCST90001418	Inverse variance weighted	2	0.618131	0.983878	0.529834
ebi-a-GCST90001418	OS in Stage III CRC Patients	CD24+ CD27+ B cell Absolute Count || id:ebi-a-GCST90001418	Constrained maximum likelihood	2	0.601244	1.04178	0.563849
ebi-a-GCST90001418	OS in Stage III CRC Patients	CD24+ CD27+ B cell Absolute Count || id:ebi-a-GCST90001418	Robust adjusted profile score (RAPS)	2	0.61828	1.08164	0.567583
ebi-a-GCST90001418	OS in Stage III CRC Patients	CD24+ CD27+ B cell Absolute Count || id:ebi-a-GCST90001418	Bayesian Weighted Mendelian Randomization	2	0.631722	1.03568	0.541891
ebi-a-GCST90001419	OS in Stage III CRC Patients	CD20- B cell %B cell || id:ebi-a-GCST90001419	Inverse variance weighted	3	1.48699	0.944374	0.115354
ebi-a-GCST90001419	OS in Stage III CRC Patients	CD20- B cell %B cell || id:ebi-a-GCST90001419	MR Egger	3	5.08814	4.88097	0.486772
ebi-a-GCST90001419	OS in Stage III CRC Patients	CD20- B cell %B cell || id:ebi-a-GCST90001419	Constrained maximum likelihood	3	1.43645	0.921397	0.118997
ebi-a-GCST90001419	OS in Stage III CRC Patients	CD20- B cell %B cell || id:ebi-a-GCST90001419	Robust adjusted profile score (RAPS)	3	1.50336	1.06	0.156114
ebi-a-GCST90001419	OS in Stage III CRC Patients	CD20- B cell %B cell || id:ebi-a-GCST90001419	Bayesian Weighted Mendelian Randomization	3	1.50538	1.00918	0.13578
ebi-a-GCST90001420	OS in Stage III CRC Patients	IgD- CD38+ B cell Absolute Count || id:ebi-a-GCST90001420	Inverse variance weighted	4	0.266745	0.691062	0.699501
ebi-a-GCST90001420	OS in Stage III CRC Patients	IgD- CD38+ B cell Absolute Count || id:ebi-a-GCST90001420	MR Egger	4	1.74119	2.65171	0.578874
ebi-a-GCST90001420	OS in Stage III CRC Patients	IgD- CD38+ B cell Absolute Count || id:ebi-a-GCST90001420	Constrained maximum likelihood	4	0.194352	0.707576	0.783567
ebi-a-GCST90001420	OS in Stage III CRC Patients	IgD- CD38+ B cell Absolute Count || id:ebi-a-GCST90001420	Robust adjusted profile score (RAPS)	4	0.276695	0.747388	0.711222
ebi-a-GCST90001420	OS in Stage III CRC Patients	IgD- CD38+ B cell Absolute Count || id:ebi-a-GCST90001420	Bayesian Weighted Mendelian Randomization	4	0.255906	0.733255	0.727089
ebi-a-GCST90001421	OS in Stage III CRC Patients	CD20- B cell Absolute Count || id:ebi-a-GCST90001421	Inverse variance weighted	6	-1.36138	0.831775	0.10169
ebi-a-GCST90001421	OS in Stage III CRC Patients	CD20- B cell Absolute Count || id:ebi-a-GCST90001421	MR Egger	6	-0.145667	3.75963	0.97095
ebi-a-GCST90001421	OS in Stage III CRC Patients	CD20- B cell Absolute Count || id:ebi-a-GCST90001421	Constrained maximum likelihood	6	-1.45367	0.8203	0.076375
ebi-a-GCST90001421	OS in Stage III CRC Patients	CD20- B cell Absolute Count || id:ebi-a-GCST90001421	Robust adjusted profile score (RAPS)	6	-1.63632	0.703654	0.0200474
ebi-a-GCST90001421	OS in Stage III CRC Patients	CD20- B cell Absolute Count || id:ebi-a-GCST90001421	Bayesian Weighted Mendelian Randomization	6	-1.51503	0.713802	0.0337978
ebi-a-GCST90001422	OS in Stage III CRC Patients	CD20- CD38- B cell %B cell || id:ebi-a-GCST90001422	Inverse variance weighted	3	-0.179187	0.787813	0.820075
ebi-a-GCST90001422	OS in Stage III CRC Patients	CD20- CD38- B cell %B cell || id:ebi-a-GCST90001422	MR Egger	3	0.620309	3.67483	0.893543
ebi-a-GCST90001422	OS in Stage III CRC Patients	CD20- CD38- B cell %B cell || id:ebi-a-GCST90001422	Constrained maximum likelihood	3	-0.0420748	0.882515	0.961974
ebi-a-GCST90001422	OS in Stage III CRC Patients	CD20- CD38- B cell %B cell || id:ebi-a-GCST90001422	Robust adjusted profile score (RAPS)	3	-0.181775	0.858773	0.832366
ebi-a-GCST90001422	OS in Stage III CRC Patients	CD20- CD38- B cell %B cell || id:ebi-a-GCST90001422	Bayesian Weighted Mendelian Randomization	3	-0.192894	0.832454	0.816758
ebi-a-GCST90001423	OS in Stage III CRC Patients	CD20- CD38- B cell Absolute Count || id:ebi-a-GCST90001423	Inverse variance weighted	5	0.199139	0.864388	0.817795
ebi-a-GCST90001423	OS in Stage III CRC Patients	CD20- CD38- B cell Absolute Count || id:ebi-a-GCST90001423	MR Egger	5	-7.11191	8.06038	0.442572
ebi-a-GCST90001423	OS in Stage III CRC Patients	CD20- CD38- B cell Absolute Count || id:ebi-a-GCST90001423	Constrained maximum likelihood	5	0.140329	0.798595	0.860514
ebi-a-GCST90001423	OS in Stage III CRC Patients	CD20- CD38- B cell Absolute Count || id:ebi-a-GCST90001423	Robust adjusted profile score (RAPS)	5	0.171247	0.880151	0.845733
ebi-a-GCST90001423	OS in Stage III CRC Patients	CD20- CD38- B cell Absolute Count || id:ebi-a-GCST90001423	Bayesian Weighted Mendelian Randomization	5	0.235876	0.931617	0.800122
ebi-a-GCST90001424	OS in Stage III CRC Patients	IgD+ B cell %Lymphocyte || id:ebi-a-GCST90001424	Inverse variance weighted	8	-0.884362	0.525773	0.0925647
ebi-a-GCST90001424	OS in Stage III CRC Patients	IgD+ B cell %Lymphocyte || id:ebi-a-GCST90001424	MR Egger	8	-3.0366	2.57049	0.282169
ebi-a-GCST90001424	OS in Stage III CRC Patients	IgD+ B cell %Lymphocyte || id:ebi-a-GCST90001424	Constrained maximum likelihood	8	-0.785766	0.538025	0.144163
ebi-a-GCST90001424	OS in Stage III CRC Patients	IgD+ B cell %Lymphocyte || id:ebi-a-GCST90001424	Robust adjusted profile score (RAPS)	8	-0.891677	0.574994	0.12096
ebi-a-GCST90001424	OS in Stage III CRC Patients	IgD+ B cell %Lymphocyte || id:ebi-a-GCST90001424	Bayesian Weighted Mendelian Randomization	8	-0.891439	0.547421	0.103433
ebi-a-GCST90001425	OS in Stage III CRC Patients	IgD- CD38+ B cell %lymphocyte || id:ebi-a-GCST90001425	Inverse variance weighted	6	-0.178655	0.6081	0.768917
ebi-a-GCST90001425	OS in Stage III CRC Patients	IgD- CD38+ B cell %lymphocyte || id:ebi-a-GCST90001425	MR Egger	6	0.83866	2.42237	0.746625
ebi-a-GCST90001425	OS in Stage III CRC Patients	IgD- CD38+ B cell %lymphocyte || id:ebi-a-GCST90001425	Constrained maximum likelihood	6	-0.193726	0.650414	0.765817
ebi-a-GCST90001425	OS in Stage III CRC Patients	IgD- CD38+ B cell %lymphocyte || id:ebi-a-GCST90001425	Robust adjusted profile score (RAPS)	6	-0.181711	0.661287	0.783482
ebi-a-GCST90001425	OS in Stage III CRC Patients	IgD- CD38+ B cell %lymphocyte || id:ebi-a-GCST90001425	Bayesian Weighted Mendelian Randomization	6	-0.200831	0.638854	0.753246
ebi-a-GCST90001426	OS in Stage III CRC Patients	IgD- CD38dim B cell %lymphocyte || id:ebi-a-GCST90001426	Inverse variance weighted	6	-0.404227	0.568536	0.477086
ebi-a-GCST90001426	OS in Stage III CRC Patients	IgD- CD38dim B cell %lymphocyte || id:ebi-a-GCST90001426	MR Egger	6	-1.91189	2.5055	0.487939
ebi-a-GCST90001426	OS in Stage III CRC Patients	IgD- CD38dim B cell %lymphocyte || id:ebi-a-GCST90001426	Constrained maximum likelihood	6	-0.411003	0.551284	0.455947
ebi-a-GCST90001426	OS in Stage III CRC Patients	IgD- CD38dim B cell %lymphocyte || id:ebi-a-GCST90001426	Robust adjusted profile score (RAPS)	6	-0.410772	0.614112	0.503567
ebi-a-GCST90001426	OS in Stage III CRC Patients	IgD- CD38dim B cell %lymphocyte || id:ebi-a-GCST90001426	Bayesian Weighted Mendelian Randomization	6	-0.400745	0.594334	0.500136
ebi-a-GCST90001427	OS in Stage III CRC Patients	IgD- CD38- B cell %lymphocyte || id:ebi-a-GCST90001427	Inverse variance weighted	5	0.161328	0.649682	0.803889
ebi-a-GCST90001427	OS in Stage III CRC Patients	IgD- CD38- B cell %lymphocyte || id:ebi-a-GCST90001427	MR Egger	5	-0.434845	3.71407	0.914195
ebi-a-GCST90001427	OS in Stage III CRC Patients	IgD- CD38- B cell %lymphocyte || id:ebi-a-GCST90001427	Constrained maximum likelihood	5	0.139307	0.667144	0.834595
ebi-a-GCST90001427	OS in Stage III CRC Patients	IgD- CD38- B cell %lymphocyte || id:ebi-a-GCST90001427	Robust adjusted profile score (RAPS)	5	0.16275	0.709136	0.818477
ebi-a-GCST90001427	OS in Stage III CRC Patients	IgD- CD38- B cell %lymphocyte || id:ebi-a-GCST90001427	Bayesian Weighted Mendelian Randomization	5	0.164218	0.675071	0.807803
ebi-a-GCST90001428	OS in Stage III CRC Patients	IgD- CD38dim B cell %B cell || id:ebi-a-GCST90001428	Inverse variance weighted	6	-0.213757	0.430607	0.619605
ebi-a-GCST90001428	OS in Stage III CRC Patients	IgD- CD38dim B cell %B cell || id:ebi-a-GCST90001428	MR Egger	6	-0.0622609	0.74526	0.937434
ebi-a-GCST90001428	OS in Stage III CRC Patients	IgD- CD38dim B cell %B cell || id:ebi-a-GCST90001428	Constrained maximum likelihood	6	-0.20489	0.498179	0.680869
ebi-a-GCST90001428	OS in Stage III CRC Patients	IgD- CD38dim B cell %B cell || id:ebi-a-GCST90001428	Robust adjusted profile score (RAPS)	6	-0.215849	0.470575	0.646455
ebi-a-GCST90001428	OS in Stage III CRC Patients	IgD- CD38dim B cell %B cell || id:ebi-a-GCST90001428	Bayesian Weighted Mendelian Randomization	6	-0.256188	0.490386	0.601378
ebi-a-GCST90001429	OS in Stage III CRC Patients	IgD+ CD38+ B cell %lymphocyte || id:ebi-a-GCST90001429	Inverse variance weighted	8	-0.195256	0.531178	0.713179
ebi-a-GCST90001429	OS in Stage III CRC Patients	IgD+ CD38+ B cell %lymphocyte || id:ebi-a-GCST90001429	MR Egger	8	-2.15425	3.14688	0.519172
ebi-a-GCST90001429	OS in Stage III CRC Patients	IgD+ CD38+ B cell %lymphocyte || id:ebi-a-GCST90001429	Constrained maximum likelihood	8	-0.168326	0.566973	0.766555
ebi-a-GCST90001429	OS in Stage III CRC Patients	IgD+ CD38+ B cell %lymphocyte || id:ebi-a-GCST90001429	Robust adjusted profile score (RAPS)	8	-0.199245	0.576805	0.729773
ebi-a-GCST90001429	OS in Stage III CRC Patients	IgD+ CD38+ B cell %lymphocyte || id:ebi-a-GCST90001429	Bayesian Weighted Mendelian Randomization	8	-0.192549	0.55279	0.727599
ebi-a-GCST90001430	OS in Stage III CRC Patients	IgD+ CD38dim B cell %lymphocyte || id:ebi-a-GCST90001430	Inverse variance weighted	8	-0.871372	0.519827	0.0936844
ebi-a-GCST90001430	OS in Stage III CRC Patients	IgD+ CD38dim B cell %lymphocyte || id:ebi-a-GCST90001430	MR Egger	8	-2.67145	2.30661	0.290808
ebi-a-GCST90001430	OS in Stage III CRC Patients	IgD+ CD38dim B cell %lymphocyte || id:ebi-a-GCST90001430	Constrained maximum likelihood	8	-0.868183	0.534949	0.104605
ebi-a-GCST90001430	OS in Stage III CRC Patients	IgD+ CD38dim B cell %lymphocyte || id:ebi-a-GCST90001430	Robust adjusted profile score (RAPS)	8	-0.887271	0.569242	0.11907
ebi-a-GCST90001430	OS in Stage III CRC Patients	IgD+ CD38dim B cell %lymphocyte || id:ebi-a-GCST90001430	Bayesian Weighted Mendelian Randomization	8	-0.878297	0.546044	0.107731
ebi-a-GCST90001431	OS in Stage III CRC Patients	IgD+ CD38- B cell %lymphocyte || id:ebi-a-GCST90001431	Inverse variance weighted	3	0.721596	0.857185	0.399889
ebi-a-GCST90001431	OS in Stage III CRC Patients	IgD+ CD38- B cell %lymphocyte || id:ebi-a-GCST90001431	MR Egger	3	-3.00397	5.85565	0.698245
ebi-a-GCST90001431	OS in Stage III CRC Patients	IgD+ CD38- B cell %lymphocyte || id:ebi-a-GCST90001431	Constrained maximum likelihood	3	0.858151	0.962723	0.372726
ebi-a-GCST90001431	OS in Stage III CRC Patients	IgD+ CD38- B cell %lymphocyte || id:ebi-a-GCST90001431	Robust adjusted profile score (RAPS)	3	0.725153	0.946537	0.44361
ebi-a-GCST90001431	OS in Stage III CRC Patients	IgD+ CD38- B cell %lymphocyte || id:ebi-a-GCST90001431	Bayesian Weighted Mendelian Randomization	3	0.744467	0.898252	0.40722
ebi-a-GCST90001432	OS in Stage III CRC Patients	Unswitched memory B cell %lymphocyte || id:ebi-a-GCST90001432	Inverse variance weighted	5	0.267342	0.638561	0.675463
ebi-a-GCST90001432	OS in Stage III CRC Patients	Unswitched memory B cell %lymphocyte || id:ebi-a-GCST90001432	MR Egger	5	-8.92945	6.03509	0.235541
ebi-a-GCST90001432	OS in Stage III CRC Patients	Unswitched memory B cell %lymphocyte || id:ebi-a-GCST90001432	Constrained maximum likelihood	5	0.24355	0.6541	0.709637
ebi-a-GCST90001432	OS in Stage III CRC Patients	Unswitched memory B cell %lymphocyte || id:ebi-a-GCST90001432	Robust adjusted profile score (RAPS)	5	0.259898	0.684896	0.704339
ebi-a-GCST90001432	OS in Stage III CRC Patients	Unswitched memory B cell %lymphocyte || id:ebi-a-GCST90001432	Bayesian Weighted Mendelian Randomization	5	0.279	0.670954	0.677538
ebi-a-GCST90001433	OS in Stage III CRC Patients	IgD- CD27- B cell %lymphocyte || id:ebi-a-GCST90001433	Inverse variance weighted	2	0.410306	0.554326	0.459186
ebi-a-GCST90001433	OS in Stage III CRC Patients	IgD- CD27- B cell %lymphocyte || id:ebi-a-GCST90001433	Constrained maximum likelihood	2	0.366678	0.581303	0.52818
ebi-a-GCST90001433	OS in Stage III CRC Patients	IgD- CD27- B cell %lymphocyte || id:ebi-a-GCST90001433	Robust adjusted profile score (RAPS)	2	0.410931	0.579493	0.478248
ebi-a-GCST90001433	OS in Stage III CRC Patients	IgD- CD27- B cell %lymphocyte || id:ebi-a-GCST90001433	Bayesian Weighted Mendelian Randomization	2	0.415518	0.563731	0.46107
ebi-a-GCST90001434	OS in Stage III CRC Patients	Switched memory B cell %lymphocyte || id:ebi-a-GCST90001434	Inverse variance weighted	6	-0.146165	0.5574	0.793147
ebi-a-GCST90001434	OS in Stage III CRC Patients	Switched memory B cell %lymphocyte || id:ebi-a-GCST90001434	MR Egger	6	-3.00887	7.74024	0.717281
ebi-a-GCST90001434	OS in Stage III CRC Patients	Switched memory B cell %lymphocyte || id:ebi-a-GCST90001434	Constrained maximum likelihood	6	-0.150177	0.538835	0.78047
ebi-a-GCST90001434	OS in Stage III CRC Patients	Switched memory B cell %lymphocyte || id:ebi-a-GCST90001434	Robust adjusted profile score (RAPS)	6	-0.148135	0.597762	0.804276
ebi-a-GCST90001434	OS in Stage III CRC Patients	Switched memory B cell %lymphocyte || id:ebi-a-GCST90001434	Bayesian Weighted Mendelian Randomization	6	-0.147934	0.575672	0.797198
ebi-a-GCST90001435	OS in Stage III CRC Patients	Plasma Blast-Plasma Cell %lymphocyte || id:ebi-a-GCST90001435	Inverse variance weighted	3	-0.759662	0.846328	0.3694
ebi-a-GCST90001435	OS in Stage III CRC Patients	Plasma Blast-Plasma Cell %lymphocyte || id:ebi-a-GCST90001435	MR Egger	3	-0.24804	2.86616	0.945043
ebi-a-GCST90001435	OS in Stage III CRC Patients	Plasma Blast-Plasma Cell %lymphocyte || id:ebi-a-GCST90001435	Constrained maximum likelihood	3	-0.742098	0.850391	0.382851
ebi-a-GCST90001435	OS in Stage III CRC Patients	Plasma Blast-Plasma Cell %lymphocyte || id:ebi-a-GCST90001435	Robust adjusted profile score (RAPS)	3	-0.761594	0.93343	0.414552
ebi-a-GCST90001435	OS in Stage III CRC Patients	Plasma Blast-Plasma Cell %lymphocyte || id:ebi-a-GCST90001435	Bayesian Weighted Mendelian Randomization	3	-0.787912	0.898754	0.380665
ebi-a-GCST90001436	OS in Stage III CRC Patients	Memory B cell %lymphocyte || id:ebi-a-GCST90001436	Inverse variance weighted	6	0.53067	0.590927	0.36917
ebi-a-GCST90001436	OS in Stage III CRC Patients	Memory B cell %lymphocyte || id:ebi-a-GCST90001436	MR Egger	6	2.02589	6.33062	0.764976
ebi-a-GCST90001436	OS in Stage III CRC Patients	Memory B cell %lymphocyte || id:ebi-a-GCST90001436	Constrained maximum likelihood	6	0.477089	0.659195	0.469222
ebi-a-GCST90001436	OS in Stage III CRC Patients	Memory B cell %lymphocyte || id:ebi-a-GCST90001436	Robust adjusted profile score (RAPS)	6	0.538986	0.645339	0.403606
ebi-a-GCST90001436	OS in Stage III CRC Patients	Memory B cell %lymphocyte || id:ebi-a-GCST90001436	Bayesian Weighted Mendelian Randomization	6	0.541788	0.616864	0.379784
ebi-a-GCST90001437	OS in Stage III CRC Patients	Naive-mature B cell %lymphocyte || id:ebi-a-GCST90001437	Inverse variance weighted	4	0.321367	0.725272	0.657694
ebi-a-GCST90001437	OS in Stage III CRC Patients	Naive-mature B cell %lymphocyte || id:ebi-a-GCST90001437	MR Egger	4	-5.51532	5.34446	0.41054
ebi-a-GCST90001437	OS in Stage III CRC Patients	Naive-mature B cell %lymphocyte || id:ebi-a-GCST90001437	Constrained maximum likelihood	4	0.211223	0.778675	0.786191
ebi-a-GCST90001437	OS in Stage III CRC Patients	Naive-mature B cell %lymphocyte || id:ebi-a-GCST90001437	Robust adjusted profile score (RAPS)	4	0.326497	0.786209	0.677937
ebi-a-GCST90001437	OS in Stage III CRC Patients	Naive-mature B cell %lymphocyte || id:ebi-a-GCST90001437	Bayesian Weighted Mendelian Randomization	4	0.341673	0.756153	0.651372
ebi-a-GCST90001438	OS in Stage III CRC Patients	IgD- CD38dim B cell Absolute Count || id:ebi-a-GCST90001438	Inverse variance weighted	4	0.511731	0.776747	0.510016
ebi-a-GCST90001438	OS in Stage III CRC Patients	IgD- CD38dim B cell Absolute Count || id:ebi-a-GCST90001438	MR Egger	4	10.7666	11.5943	0.451126
ebi-a-GCST90001438	OS in Stage III CRC Patients	IgD- CD38dim B cell Absolute Count || id:ebi-a-GCST90001438	Constrained maximum likelihood	4	0.591145	0.802064	0.461105
ebi-a-GCST90001438	OS in Stage III CRC Patients	IgD- CD38dim B cell Absolute Count || id:ebi-a-GCST90001438	Robust adjusted profile score (RAPS)	4	0.517	0.847039	0.541622
ebi-a-GCST90001438	OS in Stage III CRC Patients	IgD- CD38dim B cell Absolute Count || id:ebi-a-GCST90001438	Bayesian Weighted Mendelian Randomization	4	0.520866	0.810121	0.520257
ebi-a-GCST90001439	OS in Stage III CRC Patients	IgD+ CD24+ B cell %lymphocyte || id:ebi-a-GCST90001439	Constrained maximum likelihood	1	-0.16545	1.17499	0.88802
ebi-a-GCST90001439	OS in Stage III CRC Patients	IgD+ CD24+ B cell %lymphocyte || id:ebi-a-GCST90001439	Robust adjusted profile score (RAPS)	1	-0.179972	1.35314	0.894191
ebi-a-GCST90001440	OS in Stage III CRC Patients	IgD- CD24- B cell %lymphocyte || id:ebi-a-GCST90001440	Inverse variance weighted	3	0.769382	0.859417	0.37066
ebi-a-GCST90001440	OS in Stage III CRC Patients	IgD- CD24- B cell %lymphocyte || id:ebi-a-GCST90001440	MR Egger	3	1.89853	2.7811	0.618671
ebi-a-GCST90001440	OS in Stage III CRC Patients	IgD- CD24- B cell %lymphocyte || id:ebi-a-GCST90001440	Constrained maximum likelihood	3	0.642564	0.859048	0.454463
ebi-a-GCST90001440	OS in Stage III CRC Patients	IgD- CD24- B cell %lymphocyte || id:ebi-a-GCST90001440	Robust adjusted profile score (RAPS)	3	0.772601	0.94993	0.416033
ebi-a-GCST90001440	OS in Stage III CRC Patients	IgD- CD24- B cell %lymphocyte || id:ebi-a-GCST90001440	Bayesian Weighted Mendelian Randomization	3	0.770397	0.902767	0.393452
ebi-a-GCST90001441	OS in Stage III CRC Patients	IgD+ CD24- B cell %lymphocyte || id:ebi-a-GCST90001441	Inverse variance weighted	7	-0.303507	0.547742	0.579507
ebi-a-GCST90001441	OS in Stage III CRC Patients	IgD+ CD24- B cell %lymphocyte || id:ebi-a-GCST90001441	MR Egger	7	-3.89263	2.67256	0.205028
ebi-a-GCST90001441	OS in Stage III CRC Patients	IgD+ CD24- B cell %lymphocyte || id:ebi-a-GCST90001441	Constrained maximum likelihood	7	-0.298461	0.592308	0.614335
ebi-a-GCST90001441	OS in Stage III CRC Patients	IgD+ CD24- B cell %lymphocyte || id:ebi-a-GCST90001441	Robust adjusted profile score (RAPS)	7	-0.364644	0.588787	0.53571
ebi-a-GCST90001441	OS in Stage III CRC Patients	IgD+ CD24- B cell %lymphocyte || id:ebi-a-GCST90001441	Bayesian Weighted Mendelian Randomization	7	-0.301639	0.579975	0.603002
ebi-a-GCST90001442	OS in Stage III CRC Patients	CD24+ CD27+ B cell %lymphocyte || id:ebi-a-GCST90001442	Inverse variance weighted	3	0.833323	0.832161	0.316635
ebi-a-GCST90001442	OS in Stage III CRC Patients	CD24+ CD27+ B cell %lymphocyte || id:ebi-a-GCST90001442	MR Egger	3	-9.714	11.0102	0.539766
ebi-a-GCST90001442	OS in Stage III CRC Patients	CD24+ CD27+ B cell %lymphocyte || id:ebi-a-GCST90001442	Constrained maximum likelihood	3	0.718902	0.856911	0.4015
ebi-a-GCST90001442	OS in Stage III CRC Patients	CD24+ CD27+ B cell %lymphocyte || id:ebi-a-GCST90001442	Robust adjusted profile score (RAPS)	3	0.852015	0.902937	0.345372
ebi-a-GCST90001442	OS in Stage III CRC Patients	CD24+ CD27+ B cell %lymphocyte || id:ebi-a-GCST90001442	Bayesian Weighted Mendelian Randomization	3	0.861041	0.878528	0.327039
ebi-a-GCST90001443	OS in Stage III CRC Patients	CD20- B cell %lymphocyte || id:ebi-a-GCST90001443	Inverse variance weighted	2	-0.219653	1.35268	0.871004
ebi-a-GCST90001443	OS in Stage III CRC Patients	CD20- B cell %lymphocyte || id:ebi-a-GCST90001443	Constrained maximum likelihood	2	-0.132385	1.16672	0.90966
ebi-a-GCST90001443	OS in Stage III CRC Patients	CD20- B cell %lymphocyte || id:ebi-a-GCST90001443	Robust adjusted profile score (RAPS)	2	-0.228188	1.14397	0.841895
ebi-a-GCST90001443	OS in Stage III CRC Patients	CD20- B cell %lymphocyte || id:ebi-a-GCST90001443	Bayesian Weighted Mendelian Randomization	2	-0.429654	1.46157	0.768784
ebi-a-GCST90001444	OS in Stage III CRC Patients	CD20- CD38- B cell %lymphocyte || id:ebi-a-GCST90001444	Inverse variance weighted	2	-0.353788	1.08217	0.743726
ebi-a-GCST90001444	OS in Stage III CRC Patients	CD20- CD38- B cell %lymphocyte || id:ebi-a-GCST90001444	Constrained maximum likelihood	2	-0.245294	1.11522	0.825909
ebi-a-GCST90001444	OS in Stage III CRC Patients	CD20- CD38- B cell %lymphocyte || id:ebi-a-GCST90001444	Robust adjusted profile score (RAPS)	2	-0.361708	1.12385	0.747569
ebi-a-GCST90001444	OS in Stage III CRC Patients	CD20- CD38- B cell %lymphocyte || id:ebi-a-GCST90001444	Bayesian Weighted Mendelian Randomization	2	-0.355522	1.16369	0.759976
ebi-a-GCST90001445	OS in Stage III CRC Patients	IgD- CD38- B cell %B cell || id:ebi-a-GCST90001445	Inverse variance weighted	3	-0.624673	0.835685	0.454763
ebi-a-GCST90001445	OS in Stage III CRC Patients	IgD- CD38- B cell %B cell || id:ebi-a-GCST90001445	MR Egger	3	-0.234082	7.04445	0.978853
ebi-a-GCST90001445	OS in Stage III CRC Patients	IgD- CD38- B cell %B cell || id:ebi-a-GCST90001445	Constrained maximum likelihood	3	-0.689292	0.797023	0.38713
ebi-a-GCST90001445	OS in Stage III CRC Patients	IgD- CD38- B cell %B cell || id:ebi-a-GCST90001445	Robust adjusted profile score (RAPS)	3	-0.631403	0.918469	0.491798
ebi-a-GCST90001445	OS in Stage III CRC Patients	IgD- CD38- B cell %B cell || id:ebi-a-GCST90001445	Bayesian Weighted Mendelian Randomization	3	-0.64359	0.881287	0.465217
ebi-a-GCST90001446	OS in Stage III CRC Patients	IgD- CD38- B cell Absolute Count || id:ebi-a-GCST90001446	Inverse variance weighted	2	0.368354	1.01574	0.716869
ebi-a-GCST90001446	OS in Stage III CRC Patients	IgD- CD38- B cell Absolute Count || id:ebi-a-GCST90001446	Constrained maximum likelihood	2	0.227943	1.08512	0.833618
ebi-a-GCST90001446	OS in Stage III CRC Patients	IgD- CD38- B cell Absolute Count || id:ebi-a-GCST90001446	Robust adjusted profile score (RAPS)	2	0.371024	1.10812	0.737758
ebi-a-GCST90001446	OS in Stage III CRC Patients	IgD- CD38- B cell Absolute Count || id:ebi-a-GCST90001446	Bayesian Weighted Mendelian Randomization	2	0.381544	1.06836	0.720995
ebi-a-GCST90001447	OS in Stage III CRC Patients	IgD+ CD38+ B cell %B cell || id:ebi-a-GCST90001447	Inverse variance weighted	5	0.338266	0.60417	0.575557
ebi-a-GCST90001447	OS in Stage III CRC Patients	IgD+ CD38+ B cell %B cell || id:ebi-a-GCST90001447	MR Egger	5	0.80422	1.7582	0.678468
ebi-a-GCST90001447	OS in Stage III CRC Patients	IgD+ CD38+ B cell %B cell || id:ebi-a-GCST90001447	Constrained maximum likelihood	5	0.316544	0.618784	0.60896
ebi-a-GCST90001447	OS in Stage III CRC Patients	IgD+ CD38+ B cell %B cell || id:ebi-a-GCST90001447	Robust adjusted profile score (RAPS)	5	0.34365	0.657972	0.601471
ebi-a-GCST90001447	OS in Stage III CRC Patients	IgD+ CD38+ B cell %B cell || id:ebi-a-GCST90001447	Bayesian Weighted Mendelian Randomization	5	0.334124	0.645468	0.604705
ebi-a-GCST90001448	OS in Stage III CRC Patients	CD11c+ monocyte Absolute Count || id:ebi-a-GCST90001448	Constrained maximum likelihood	1	-0.822592	1.36701	0.547342
ebi-a-GCST90001448	OS in Stage III CRC Patients	CD11c+ monocyte Absolute Count || id:ebi-a-GCST90001448	Robust adjusted profile score (RAPS)	1	-0.826452	1.5994	0.605346
ebi-a-GCST90001449	OS in Stage III CRC Patients	CD11c+ monocyte %monocyte || id:ebi-a-GCST90001449	Inverse variance weighted	4	1.01251	0.424617	0.0171008
ebi-a-GCST90001449	OS in Stage III CRC Patients	CD11c+ monocyte %monocyte || id:ebi-a-GCST90001449	MR Egger	4	1.65608	0.879737	0.200481
ebi-a-GCST90001449	OS in Stage III CRC Patients	CD11c+ monocyte %monocyte || id:ebi-a-GCST90001449	Constrained maximum likelihood	4	0.957655	0.493327	0.052232
ebi-a-GCST90001449	OS in Stage III CRC Patients	CD11c+ monocyte %monocyte || id:ebi-a-GCST90001449	Robust adjusted profile score (RAPS)	4	1.00787	0.479729	0.0356481
ebi-a-GCST90001449	OS in Stage III CRC Patients	CD11c+ monocyte %monocyte || id:ebi-a-GCST90001449	Bayesian Weighted Mendelian Randomization	4	1.0332	0.460655	0.0249035
ebi-a-GCST90001450	OS in Stage III CRC Patients	CD62L- monocyte Absolute Count || id:ebi-a-GCST90001450	Inverse variance weighted	6	0.401764	0.491159	0.413362
ebi-a-GCST90001450	OS in Stage III CRC Patients	CD62L- monocyte Absolute Count || id:ebi-a-GCST90001450	MR Egger	6	1.4423	2.73325	0.625631
ebi-a-GCST90001450	OS in Stage III CRC Patients	CD62L- monocyte Absolute Count || id:ebi-a-GCST90001450	Constrained maximum likelihood	6	0.355216	0.512045	0.487858
ebi-a-GCST90001450	OS in Stage III CRC Patients	CD62L- monocyte Absolute Count || id:ebi-a-GCST90001450	Robust adjusted profile score (RAPS)	6	0.452253	0.540745	0.402958
ebi-a-GCST90001450	OS in Stage III CRC Patients	CD62L- monocyte Absolute Count || id:ebi-a-GCST90001450	Bayesian Weighted Mendelian Randomization	6	0.428139	0.512154	0.403178
ebi-a-GCST90001451	OS in Stage III CRC Patients	CD62L- monocyte %monocyte || id:ebi-a-GCST90001451	Inverse variance weighted	10	0.0408713	0.319437	0.89819
ebi-a-GCST90001451	OS in Stage III CRC Patients	CD62L- monocyte %monocyte || id:ebi-a-GCST90001451	MR Egger	10	-0.302786	0.981963	0.765694
ebi-a-GCST90001451	OS in Stage III CRC Patients	CD62L- monocyte %monocyte || id:ebi-a-GCST90001451	Constrained maximum likelihood	10	0.048405	0.356234	0.891916
ebi-a-GCST90001451	OS in Stage III CRC Patients	CD62L- monocyte %monocyte || id:ebi-a-GCST90001451	Robust adjusted profile score (RAPS)	10	0.0836238	0.335863	0.803375
ebi-a-GCST90001451	OS in Stage III CRC Patients	CD62L- monocyte %monocyte || id:ebi-a-GCST90001451	Bayesian Weighted Mendelian Randomization	10	0.0521807	0.331048	0.874754
ebi-a-GCST90001452	OS in Stage III CRC Patients	CD11c+ CD62L- monocyte Absolute Count || id:ebi-a-GCST90001452	Inverse variance weighted	3	0.0403499	0.806326	0.960089
ebi-a-GCST90001452	OS in Stage III CRC Patients	CD11c+ CD62L- monocyte Absolute Count || id:ebi-a-GCST90001452	MR Egger	3	-3.3974	3.86881	0.541245
ebi-a-GCST90001452	OS in Stage III CRC Patients	CD11c+ CD62L- monocyte Absolute Count || id:ebi-a-GCST90001452	Constrained maximum likelihood	3	0.0608515	0.83897	0.942179
ebi-a-GCST90001452	OS in Stage III CRC Patients	CD11c+ CD62L- monocyte Absolute Count || id:ebi-a-GCST90001452	Robust adjusted profile score (RAPS)	3	0.0409085	0.884804	0.963123
ebi-a-GCST90001452	OS in Stage III CRC Patients	CD11c+ CD62L- monocyte Absolute Count || id:ebi-a-GCST90001452	Bayesian Weighted Mendelian Randomization	3	0.0603036	0.857339	0.943925
ebi-a-GCST90001453	OS in Stage III CRC Patients	CD11c+ CD62L- monocyte %monocyte || id:ebi-a-GCST90001453	Inverse variance weighted	4	0.522394	0.513806	0.309289
ebi-a-GCST90001453	OS in Stage III CRC Patients	CD11c+ CD62L- monocyte %monocyte || id:ebi-a-GCST90001453	MR Egger	4	1.97894	1.24388	0.252602
ebi-a-GCST90001453	OS in Stage III CRC Patients	CD11c+ CD62L- monocyte %monocyte || id:ebi-a-GCST90001453	Constrained maximum likelihood	4	0.438268	0.577386	0.447819
ebi-a-GCST90001453	OS in Stage III CRC Patients	CD11c+ CD62L- monocyte %monocyte || id:ebi-a-GCST90001453	Robust adjusted profile score (RAPS)	4	0.532291	0.554531	0.337108
ebi-a-GCST90001453	OS in Stage III CRC Patients	CD11c+ CD62L- monocyte %monocyte || id:ebi-a-GCST90001453	Bayesian Weighted Mendelian Randomization	4	0.521632	0.54694	0.340221
ebi-a-GCST90001454	OS in Stage III CRC Patients	CD62L- HLA DR++ monocyte Absolute Count || id:ebi-a-GCST90001454	Inverse variance weighted	3	-0.410046	0.76535	0.592122
ebi-a-GCST90001454	OS in Stage III CRC Patients	CD62L- HLA DR++ monocyte Absolute Count || id:ebi-a-GCST90001454	MR Egger	3	-0.490589	2.99982	0.896801
ebi-a-GCST90001454	OS in Stage III CRC Patients	CD62L- HLA DR++ monocyte Absolute Count || id:ebi-a-GCST90001454	Constrained maximum likelihood	3	-0.530503	0.869357	0.541713
ebi-a-GCST90001454	OS in Stage III CRC Patients	CD62L- HLA DR++ monocyte Absolute Count || id:ebi-a-GCST90001454	Robust adjusted profile score (RAPS)	3	-0.414323	0.837329	0.62073
ebi-a-GCST90001454	OS in Stage III CRC Patients	CD62L- HLA DR++ monocyte Absolute Count || id:ebi-a-GCST90001454	Bayesian Weighted Mendelian Randomization	3	-0.417658	0.804011	0.603435
ebi-a-GCST90001455	OS in Stage III CRC Patients	CD62L- HLA DR++ monocyte %monocyte || id:ebi-a-GCST90001455	Inverse variance weighted	2	0.133907	0.719962	0.852452
ebi-a-GCST90001455	OS in Stage III CRC Patients	CD62L- HLA DR++ monocyte %monocyte || id:ebi-a-GCST90001455	Constrained maximum likelihood	2	0.0572419	0.775687	0.941173
ebi-a-GCST90001455	OS in Stage III CRC Patients	CD62L- HLA DR++ monocyte %monocyte || id:ebi-a-GCST90001455	Robust adjusted profile score (RAPS)	2	0.135623	0.789876	0.863672
ebi-a-GCST90001455	OS in Stage III CRC Patients	CD62L- HLA DR++ monocyte %monocyte || id:ebi-a-GCST90001455	Bayesian Weighted Mendelian Randomization	2	0.167117	0.783239	0.831041
ebi-a-GCST90001456	OS in Stage III CRC Patients	CD11c+ HLA DR++ monocyte Absolute Count || id:ebi-a-GCST90001456	Inverse variance weighted	4	-0.664841	1.01724	0.513386
ebi-a-GCST90001456	OS in Stage III CRC Patients	CD11c+ HLA DR++ monocyte Absolute Count || id:ebi-a-GCST90001456	MR Egger	4	-12.4001	5.14752	0.137627
ebi-a-GCST90001456	OS in Stage III CRC Patients	CD11c+ HLA DR++ monocyte Absolute Count || id:ebi-a-GCST90001456	Constrained maximum likelihood	4	-0.539143	0.965797	0.576683
ebi-a-GCST90001456	OS in Stage III CRC Patients	CD11c+ HLA DR++ monocyte Absolute Count || id:ebi-a-GCST90001456	Robust adjusted profile score (RAPS)	4	-0.956588	1.10526	0.386771
ebi-a-GCST90001456	OS in Stage III CRC Patients	CD11c+ HLA DR++ monocyte Absolute Count || id:ebi-a-GCST90001456	Bayesian Weighted Mendelian Randomization	4	-1.00269	1.19644	0.401996
ebi-a-GCST90001457	OS in Stage III CRC Patients	CD11c+ HLA DR++ monocyte %monocyte || id:ebi-a-GCST90001457	Inverse variance weighted	5	0.850699	0.518676	0.100977
ebi-a-GCST90001457	OS in Stage III CRC Patients	CD11c+ HLA DR++ monocyte %monocyte || id:ebi-a-GCST90001457	MR Egger	5	1.36027	1.34297	0.38571
ebi-a-GCST90001457	OS in Stage III CRC Patients	CD11c+ HLA DR++ monocyte %monocyte || id:ebi-a-GCST90001457	Constrained maximum likelihood	5	0.835298	0.564308	0.138815
ebi-a-GCST90001457	OS in Stage III CRC Patients	CD11c+ HLA DR++ monocyte %monocyte || id:ebi-a-GCST90001457	Robust adjusted profile score (RAPS)	5	0.861469	0.570702	0.131174
ebi-a-GCST90001457	OS in Stage III CRC Patients	CD11c+ HLA DR++ monocyte %monocyte || id:ebi-a-GCST90001457	Bayesian Weighted Mendelian Randomization	5	0.865257	0.550924	0.116286
ebi-a-GCST90001458	OS in Stage III CRC Patients	Myeloid Dendritic Cell Absolute Count || id:ebi-a-GCST90001458	Inverse variance weighted	3	-0.172231	0.780136	0.825271
ebi-a-GCST90001458	OS in Stage III CRC Patients	Myeloid Dendritic Cell Absolute Count || id:ebi-a-GCST90001458	MR Egger	3	-3.92531	5.14871	0.585317
ebi-a-GCST90001458	OS in Stage III CRC Patients	Myeloid Dendritic Cell Absolute Count || id:ebi-a-GCST90001458	Constrained maximum likelihood	3	-0.167992	0.761899	0.825488
ebi-a-GCST90001458	OS in Stage III CRC Patients	Myeloid Dendritic Cell Absolute Count || id:ebi-a-GCST90001458	Robust adjusted profile score (RAPS)	3	-0.174047	0.844861	0.836785
ebi-a-GCST90001458	OS in Stage III CRC Patients	Myeloid Dendritic Cell Absolute Count || id:ebi-a-GCST90001458	Bayesian Weighted Mendelian Randomization	3	-0.162197	0.812973	0.841863
ebi-a-GCST90001459	OS in Stage III CRC Patients	Myeloid Dendritic Cell %Dendritic Cell || id:ebi-a-GCST90001459	Inverse variance weighted	7	-0.684809	0.49323	0.16501
ebi-a-GCST90001459	OS in Stage III CRC Patients	Myeloid Dendritic Cell %Dendritic Cell || id:ebi-a-GCST90001459	MR Egger	7	0.835215	2.61993	0.76277
ebi-a-GCST90001459	OS in Stage III CRC Patients	Myeloid Dendritic Cell %Dendritic Cell || id:ebi-a-GCST90001459	Constrained maximum likelihood	7	-0.66969	0.523753	0.201025
ebi-a-GCST90001459	OS in Stage III CRC Patients	Myeloid Dendritic Cell %Dendritic Cell || id:ebi-a-GCST90001459	Robust adjusted profile score (RAPS)	7	-0.783352	0.537311	0.144865
ebi-a-GCST90001459	OS in Stage III CRC Patients	Myeloid Dendritic Cell %Dendritic Cell || id:ebi-a-GCST90001459	Bayesian Weighted Mendelian Randomization	7	-0.721537	0.537402	0.179389
ebi-a-GCST90001460	OS in Stage III CRC Patients	Plasmacytoid Dendritic Cell Absolute Count || id:ebi-a-GCST90001460	Inverse variance weighted	7	1.25086	0.501561	0.0126335
ebi-a-GCST90001460	OS in Stage III CRC Patients	Plasmacytoid Dendritic Cell Absolute Count || id:ebi-a-GCST90001460	MR Egger	7	-1.55719	2.00015	0.471471
ebi-a-GCST90001460	OS in Stage III CRC Patients	Plasmacytoid Dendritic Cell Absolute Count || id:ebi-a-GCST90001460	Constrained maximum likelihood	7	1.19709	0.521587	0.0217278
ebi-a-GCST90001460	OS in Stage III CRC Patients	Plasmacytoid Dendritic Cell Absolute Count || id:ebi-a-GCST90001460	Robust adjusted profile score (RAPS)	7	1.2771	0.550086	0.0202526
ebi-a-GCST90001460	OS in Stage III CRC Patients	Plasmacytoid Dendritic Cell Absolute Count || id:ebi-a-GCST90001460	Bayesian Weighted Mendelian Randomization	7	1.30777	0.532726	0.0140936
ebi-a-GCST90001461	OS in Stage III CRC Patients	Dendritic Cell Absolute Count || id:ebi-a-GCST90001461	Inverse variance weighted	4	-0.99429	0.764091	0.193165
ebi-a-GCST90001461	OS in Stage III CRC Patients	Dendritic Cell Absolute Count || id:ebi-a-GCST90001461	MR Egger	4	-4.49597	4.46016	0.419572
ebi-a-GCST90001461	OS in Stage III CRC Patients	Dendritic Cell Absolute Count || id:ebi-a-GCST90001461	Constrained maximum likelihood	4	-1.13354	0.771909	0.141971
ebi-a-GCST90001461	OS in Stage III CRC Patients	Dendritic Cell Absolute Count || id:ebi-a-GCST90001461	Robust adjusted profile score (RAPS)	4	-1.01215	0.844926	0.230951
ebi-a-GCST90001461	OS in Stage III CRC Patients	Dendritic Cell Absolute Count || id:ebi-a-GCST90001461	Bayesian Weighted Mendelian Randomization	4	-1.01366	0.810069	0.210815
ebi-a-GCST90001463	OS in Stage III CRC Patients	CD62L- Dendritic Cell %Dendritic Cell || id:ebi-a-GCST90001463	Inverse variance weighted	6	0.0877583	0.574446	0.878579
ebi-a-GCST90001463	OS in Stage III CRC Patients	CD62L- Dendritic Cell %Dendritic Cell || id:ebi-a-GCST90001463	MR Egger	6	-0.0301414	3.60987	0.993738
ebi-a-GCST90001463	OS in Stage III CRC Patients	CD62L- Dendritic Cell %Dendritic Cell || id:ebi-a-GCST90001463	Constrained maximum likelihood	6	0.0675108	0.550217	0.902346
ebi-a-GCST90001463	OS in Stage III CRC Patients	CD62L- Dendritic Cell %Dendritic Cell || id:ebi-a-GCST90001463	Robust adjusted profile score (RAPS)	6	0.0879054	0.629178	0.888886
ebi-a-GCST90001463	OS in Stage III CRC Patients	CD62L- Dendritic Cell %Dendritic Cell || id:ebi-a-GCST90001463	Bayesian Weighted Mendelian Randomization	6	0.0886771	0.592864	0.881101
ebi-a-GCST90001464	OS in Stage III CRC Patients	CD86+ myeloid Dendritic Cell Absolute Count || id:ebi-a-GCST90001464	Inverse variance weighted	2	0.159664	0.934391	0.864322
ebi-a-GCST90001464	OS in Stage III CRC Patients	CD86+ myeloid Dendritic Cell Absolute Count || id:ebi-a-GCST90001464	Constrained maximum likelihood	2	0.0323833	1.01826	0.97463
ebi-a-GCST90001464	OS in Stage III CRC Patients	CD86+ myeloid Dendritic Cell Absolute Count || id:ebi-a-GCST90001464	Robust adjusted profile score (RAPS)	2	0.160386	1.02672	0.875866
ebi-a-GCST90001464	OS in Stage III CRC Patients	CD86+ myeloid Dendritic Cell Absolute Count || id:ebi-a-GCST90001464	Bayesian Weighted Mendelian Randomization	2	0.168507	0.985585	0.864246
ebi-a-GCST90001465	OS in Stage III CRC Patients	CD86+ myeloid Dendritic Cell %Dendritic Cell || id:ebi-a-GCST90001465	Inverse variance weighted	3	0.152224	0.852348	0.858257
ebi-a-GCST90001465	OS in Stage III CRC Patients	CD86+ myeloid Dendritic Cell %Dendritic Cell || id:ebi-a-GCST90001465	MR Egger	3	8.70813	16.277	0.687259
ebi-a-GCST90001465	OS in Stage III CRC Patients	CD86+ myeloid Dendritic Cell %Dendritic Cell || id:ebi-a-GCST90001465	Constrained maximum likelihood	3	0.0259615	0.861809	0.975968
ebi-a-GCST90001465	OS in Stage III CRC Patients	CD86+ myeloid Dendritic Cell %Dendritic Cell || id:ebi-a-GCST90001465	Robust adjusted profile score (RAPS)	3	0.153943	0.935164	0.869246
ebi-a-GCST90001465	OS in Stage III CRC Patients	CD86+ myeloid Dendritic Cell %Dendritic Cell || id:ebi-a-GCST90001465	Bayesian Weighted Mendelian Randomization	3	0.154553	0.895187	0.862927
ebi-a-GCST90001466	OS in Stage III CRC Patients	CD86+ plasmacytoid Dendritic Cell Absolute Count || id:ebi-a-GCST90001466	Inverse variance weighted	6	0.284526	0.584393	0.626347
ebi-a-GCST90001466	OS in Stage III CRC Patients	CD86+ plasmacytoid Dendritic Cell Absolute Count || id:ebi-a-GCST90001466	MR Egger	6	1.58681	1.67285	0.396555
ebi-a-GCST90001466	OS in Stage III CRC Patients	CD86+ plasmacytoid Dendritic Cell Absolute Count || id:ebi-a-GCST90001466	Constrained maximum likelihood	6	0.289051	0.651251	0.657158
ebi-a-GCST90001466	OS in Stage III CRC Patients	CD86+ plasmacytoid Dendritic Cell Absolute Count || id:ebi-a-GCST90001466	Robust adjusted profile score (RAPS)	6	0.309764	0.633592	0.624912
ebi-a-GCST90001466	OS in Stage III CRC Patients	CD86+ plasmacytoid Dendritic Cell Absolute Count || id:ebi-a-GCST90001466	Bayesian Weighted Mendelian Randomization	6	0.260195	0.61529	0.672382
ebi-a-GCST90001467	OS in Stage III CRC Patients	CD86+ plasmacytoid Dendritic Cell %Dendritic Cell || id:ebi-a-GCST90001467	Inverse variance weighted	7	-0.307263	0.5246	0.558071
ebi-a-GCST90001467	OS in Stage III CRC Patients	CD86+ plasmacytoid Dendritic Cell %Dendritic Cell || id:ebi-a-GCST90001467	MR Egger	7	-1.34771	5.99471	0.831021
ebi-a-GCST90001467	OS in Stage III CRC Patients	CD86+ plasmacytoid Dendritic Cell %Dendritic Cell || id:ebi-a-GCST90001467	Constrained maximum likelihood	7	-0.316622	0.517964	0.541012
ebi-a-GCST90001467	OS in Stage III CRC Patients	CD86+ plasmacytoid Dendritic Cell %Dendritic Cell || id:ebi-a-GCST90001467	Robust adjusted profile score (RAPS)	7	-0.310335	0.572557	0.587808
ebi-a-GCST90001467	OS in Stage III CRC Patients	CD86+ plasmacytoid Dendritic Cell %Dendritic Cell || id:ebi-a-GCST90001467	Bayesian Weighted Mendelian Randomization	7	-0.310825	0.543994	0.567745
ebi-a-GCST90001468	OS in Stage III CRC Patients	CD62L- myeloid Dendritic Cell Absolute Count || id:ebi-a-GCST90001468	Inverse variance weighted	3	0.911344	0.837092	0.276285
ebi-a-GCST90001468	OS in Stage III CRC Patients	CD62L- myeloid Dendritic Cell Absolute Count || id:ebi-a-GCST90001468	MR Egger	3	1.24675	5.14464	0.84864
ebi-a-GCST90001468	OS in Stage III CRC Patients	CD62L- myeloid Dendritic Cell Absolute Count || id:ebi-a-GCST90001468	Constrained maximum likelihood	3	0.871572	0.841539	0.300348
ebi-a-GCST90001468	OS in Stage III CRC Patients	CD62L- myeloid Dendritic Cell Absolute Count || id:ebi-a-GCST90001468	Robust adjusted profile score (RAPS)	3	0.914729	0.927405	0.32397
ebi-a-GCST90001468	OS in Stage III CRC Patients	CD62L- myeloid Dendritic Cell Absolute Count || id:ebi-a-GCST90001468	Bayesian Weighted Mendelian Randomization	3	0.929382	0.88184	0.291923
ebi-a-GCST90001469	OS in Stage III CRC Patients	CD62L- myeloid Dendritic Cell %Dendritic Cell || id:ebi-a-GCST90001469	Inverse variance weighted	3	0.202008	0.686072	0.768421
ebi-a-GCST90001469	OS in Stage III CRC Patients	CD62L- myeloid Dendritic Cell %Dendritic Cell || id:ebi-a-GCST90001469	MR Egger	3	0.855221	2.61777	0.798976
ebi-a-GCST90001469	OS in Stage III CRC Patients	CD62L- myeloid Dendritic Cell %Dendritic Cell || id:ebi-a-GCST90001469	Constrained maximum likelihood	3	0.117761	0.686553	0.863811
ebi-a-GCST90001469	OS in Stage III CRC Patients	CD62L- myeloid Dendritic Cell %Dendritic Cell || id:ebi-a-GCST90001469	Robust adjusted profile score (RAPS)	3	0.202332	0.754171	0.788481
ebi-a-GCST90001469	OS in Stage III CRC Patients	CD62L- myeloid Dendritic Cell %Dendritic Cell || id:ebi-a-GCST90001469	Bayesian Weighted Mendelian Randomization	3	0.201422	0.724276	0.780935
ebi-a-GCST90001470	OS in Stage III CRC Patients	CD62L- plasmacytoid Dendritic Cell Absolute Count || id:ebi-a-GCST90001470	Inverse variance weighted	8	0.291638	0.476049	0.540127
ebi-a-GCST90001470	OS in Stage III CRC Patients	CD62L- plasmacytoid Dendritic Cell Absolute Count || id:ebi-a-GCST90001470	MR Egger	8	-1.86478	1.06278	0.129857
ebi-a-GCST90001470	OS in Stage III CRC Patients	CD62L- plasmacytoid Dendritic Cell Absolute Count || id:ebi-a-GCST90001470	Constrained maximum likelihood	8	0.160104	0.458646	0.72703
ebi-a-GCST90001470	OS in Stage III CRC Patients	CD62L- plasmacytoid Dendritic Cell Absolute Count || id:ebi-a-GCST90001470	Robust adjusted profile score (RAPS)	8	0.161837	0.428855	0.705899
ebi-a-GCST90001470	OS in Stage III CRC Patients	CD62L- plasmacytoid Dendritic Cell Absolute Count || id:ebi-a-GCST90001470	Bayesian Weighted Mendelian Randomization	8	0.207926	0.519518	0.688988
ebi-a-GCST90001471	OS in Stage III CRC Patients	CD62L- plasmacytoid Dendritic Cell %Dendritic Cell || id:ebi-a-GCST90001471	Inverse variance weighted	5	0.00872814	0.427287	0.983703
ebi-a-GCST90001471	OS in Stage III CRC Patients	CD62L- plasmacytoid Dendritic Cell %Dendritic Cell || id:ebi-a-GCST90001471	MR Egger	5	0.47856	1.16375	0.708521
ebi-a-GCST90001471	OS in Stage III CRC Patients	CD62L- plasmacytoid Dendritic Cell %Dendritic Cell || id:ebi-a-GCST90001471	Constrained maximum likelihood	5	0.0283041	0.419714	0.946234
ebi-a-GCST90001471	OS in Stage III CRC Patients	CD62L- plasmacytoid Dendritic Cell %Dendritic Cell || id:ebi-a-GCST90001471	Robust adjusted profile score (RAPS)	5	0.00881161	0.45406	0.984517
ebi-a-GCST90001471	OS in Stage III CRC Patients	CD62L- plasmacytoid Dendritic Cell %Dendritic Cell || id:ebi-a-GCST90001471	Bayesian Weighted Mendelian Randomization	5	0.0206899	0.441149	0.962593
ebi-a-GCST90001472	OS in Stage III CRC Patients	CD62L- CD86+ myeloid Dendritic Cell Absolute Count || id:ebi-a-GCST90001472	Constrained maximum likelihood	1	-1.81225	1.37725	0.188226
ebi-a-GCST90001472	OS in Stage III CRC Patients	CD62L- CD86+ myeloid Dendritic Cell Absolute Count || id:ebi-a-GCST90001472	Robust adjusted profile score (RAPS)	1	-1.81153	1.58504	0.253084
ebi-a-GCST90001473	OS in Stage III CRC Patients	CD62L- CD86+ myeloid Dendritic Cell %Dendritic Cell || id:ebi-a-GCST90001473	Inverse variance weighted	2	0.490756	1.12636	0.663054
ebi-a-GCST90001473	OS in Stage III CRC Patients	CD62L- CD86+ myeloid Dendritic Cell %Dendritic Cell || id:ebi-a-GCST90001473	Constrained maximum likelihood	2	0.467247	1.20683	0.698632
ebi-a-GCST90001473	OS in Stage III CRC Patients	CD62L- CD86+ myeloid Dendritic Cell %Dendritic Cell || id:ebi-a-GCST90001473	Robust adjusted profile score (RAPS)	2	0.494326	1.24073	0.690323
ebi-a-GCST90001473	OS in Stage III CRC Patients	CD62L- CD86+ myeloid Dendritic Cell %Dendritic Cell || id:ebi-a-GCST90001473	Bayesian Weighted Mendelian Randomization	2	0.509377	1.19326	0.669468
ebi-a-GCST90001474	OS in Stage III CRC Patients	Plasmacytoid Dendritic Cell %Dendritic Cell || id:ebi-a-GCST90001474	Inverse variance weighted	6	0.305264	0.470714	0.516653
ebi-a-GCST90001474	OS in Stage III CRC Patients	Plasmacytoid Dendritic Cell %Dendritic Cell || id:ebi-a-GCST90001474	MR Egger	6	0.830437	2.32023	0.738498
ebi-a-GCST90001474	OS in Stage III CRC Patients	Plasmacytoid Dendritic Cell %Dendritic Cell || id:ebi-a-GCST90001474	Constrained maximum likelihood	6	0.276152	0.544263	0.611883
ebi-a-GCST90001474	OS in Stage III CRC Patients	Plasmacytoid Dendritic Cell %Dendritic Cell || id:ebi-a-GCST90001474	Robust adjusted profile score (RAPS)	6	0.326237	0.507391	0.520243
ebi-a-GCST90001474	OS in Stage III CRC Patients	Plasmacytoid Dendritic Cell %Dendritic Cell || id:ebi-a-GCST90001474	Bayesian Weighted Mendelian Randomization	6	0.318598	0.528089	0.546306
ebi-a-GCST90001475	OS in Stage III CRC Patients	HLA DR++ monocyte %monocyte || id:ebi-a-GCST90001475	Inverse variance weighted	4	-0.358615	0.69631	0.606538
ebi-a-GCST90001475	OS in Stage III CRC Patients	HLA DR++ monocyte %monocyte || id:ebi-a-GCST90001475	MR Egger	4	-4.05752	3.48234	0.364122
ebi-a-GCST90001475	OS in Stage III CRC Patients	HLA DR++ monocyte %monocyte || id:ebi-a-GCST90001475	Constrained maximum likelihood	4	-0.186781	0.713929	0.793611
ebi-a-GCST90001475	OS in Stage III CRC Patients	HLA DR++ monocyte %monocyte || id:ebi-a-GCST90001475	Robust adjusted profile score (RAPS)	4	-0.289762	0.749096	0.698893
ebi-a-GCST90001475	OS in Stage III CRC Patients	HLA DR++ monocyte %monocyte || id:ebi-a-GCST90001475	Bayesian Weighted Mendelian Randomization	4	-0.247766	0.800322	0.756878
ebi-a-GCST90001476	OS in Stage III CRC Patients	HLA DR++ monocyte %leukocyte || id:ebi-a-GCST90001476	Inverse variance weighted	2	-1.35402	0.915524	0.139151
ebi-a-GCST90001476	OS in Stage III CRC Patients	HLA DR++ monocyte %leukocyte || id:ebi-a-GCST90001476	Constrained maximum likelihood	2	-1.27135	0.940352	0.176379
ebi-a-GCST90001476	OS in Stage III CRC Patients	HLA DR++ monocyte %leukocyte || id:ebi-a-GCST90001476	Robust adjusted profile score (RAPS)	2	-1.35741	1.00114	0.175142
ebi-a-GCST90001476	OS in Stage III CRC Patients	HLA DR++ monocyte %leukocyte || id:ebi-a-GCST90001476	Bayesian Weighted Mendelian Randomization	2	-1.36798	0.998997	0.170889
ebi-a-GCST90001477	OS in Stage III CRC Patients	HLA DR++ monocyte Absolute Count || id:ebi-a-GCST90001477	Inverse variance weighted	4	-0.481315	0.713515	0.49995
ebi-a-GCST90001477	OS in Stage III CRC Patients	HLA DR++ monocyte Absolute Count || id:ebi-a-GCST90001477	MR Egger	4	-14.6504	8.77292	0.236879
ebi-a-GCST90001477	OS in Stage III CRC Patients	HLA DR++ monocyte Absolute Count || id:ebi-a-GCST90001477	Constrained maximum likelihood	4	-0.441205	0.760197	0.561657
ebi-a-GCST90001477	OS in Stage III CRC Patients	HLA DR++ monocyte Absolute Count || id:ebi-a-GCST90001477	Robust adjusted profile score (RAPS)	4	-0.482569	0.770945	0.531351
ebi-a-GCST90001477	OS in Stage III CRC Patients	HLA DR++ monocyte Absolute Count || id:ebi-a-GCST90001477	Bayesian Weighted Mendelian Randomization	4	-0.490788	0.766462	0.521959
ebi-a-GCST90001478	OS in Stage III CRC Patients	CD4 regulatory T cell %CD4+ T cell || id:ebi-a-GCST90001478	Inverse variance weighted	2	1.16673	0.882527	0.186157
ebi-a-GCST90001478	OS in Stage III CRC Patients	CD4 regulatory T cell %CD4+ T cell || id:ebi-a-GCST90001478	Constrained maximum likelihood	2	1.07014	0.930604	0.250169
ebi-a-GCST90001478	OS in Stage III CRC Patients	CD4 regulatory T cell %CD4+ T cell || id:ebi-a-GCST90001478	Robust adjusted profile score (RAPS)	2	1.1776	0.950295	0.215275
ebi-a-GCST90001478	OS in Stage III CRC Patients	CD4 regulatory T cell %CD4+ T cell || id:ebi-a-GCST90001478	Bayesian Weighted Mendelian Randomization	2	1.19618	0.925419	0.196156
ebi-a-GCST90001479	OS in Stage III CRC Patients	CD4 regulatory T cell %T cell || id:ebi-a-GCST90001479	Inverse variance weighted	4	0.169782	0.628798	0.787152
ebi-a-GCST90001479	OS in Stage III CRC Patients	CD4 regulatory T cell %T cell || id:ebi-a-GCST90001479	MR Egger	4	-1.25254	1.7477	0.547964
ebi-a-GCST90001479	OS in Stage III CRC Patients	CD4 regulatory T cell %T cell || id:ebi-a-GCST90001479	Constrained maximum likelihood	4	0.114007	0.725967	0.875213
ebi-a-GCST90001479	OS in Stage III CRC Patients	CD4 regulatory T cell %T cell || id:ebi-a-GCST90001479	Robust adjusted profile score (RAPS)	4	0.171601	0.692191	0.804204
ebi-a-GCST90001479	OS in Stage III CRC Patients	CD4 regulatory T cell %T cell || id:ebi-a-GCST90001479	Bayesian Weighted Mendelian Randomization	4	0.221503	0.660658	0.737416
ebi-a-GCST90001480	OS in Stage III CRC Patients	Resting CD4 regulatory T cell Absolute Count || id:ebi-a-GCST90001480	Inverse variance weighted	9	-0.143091	0.391863	0.714996
ebi-a-GCST90001480	OS in Stage III CRC Patients	Resting CD4 regulatory T cell Absolute Count || id:ebi-a-GCST90001480	MR Egger	9	0.41457	1.48402	0.788045
ebi-a-GCST90001480	OS in Stage III CRC Patients	Resting CD4 regulatory T cell Absolute Count || id:ebi-a-GCST90001480	Constrained maximum likelihood	9	-0.159303	0.435506	0.714524
ebi-a-GCST90001480	OS in Stage III CRC Patients	Resting CD4 regulatory T cell Absolute Count || id:ebi-a-GCST90001480	Robust adjusted profile score (RAPS)	9	-0.146835	0.419146	0.726099
ebi-a-GCST90001480	OS in Stage III CRC Patients	Resting CD4 regulatory T cell Absolute Count || id:ebi-a-GCST90001480	Bayesian Weighted Mendelian Randomization	9	-0.173573	0.41405	0.675065
ebi-a-GCST90001481	OS in Stage III CRC Patients	Resting CD4 regulatory T cell %CD4 regulatory T cell || id:ebi-a-GCST90001481	Inverse variance weighted	4	-0.615438	0.461266	0.182126
ebi-a-GCST90001481	OS in Stage III CRC Patients	Resting CD4 regulatory T cell %CD4 regulatory T cell || id:ebi-a-GCST90001481	MR Egger	4	-4.06111	3.7628	0.393323
ebi-a-GCST90001481	OS in Stage III CRC Patients	Resting CD4 regulatory T cell %CD4 regulatory T cell || id:ebi-a-GCST90001481	Constrained maximum likelihood	4	-0.591993	0.469558	0.207401
ebi-a-GCST90001481	OS in Stage III CRC Patients	Resting CD4 regulatory T cell %CD4 regulatory T cell || id:ebi-a-GCST90001481	Robust adjusted profile score (RAPS)	4	-0.61833	0.484269	0.201662
ebi-a-GCST90001481	OS in Stage III CRC Patients	Resting CD4 regulatory T cell %CD4 regulatory T cell || id:ebi-a-GCST90001481	Bayesian Weighted Mendelian Randomization	4	-0.624674	0.470195	0.183999
ebi-a-GCST90001482	OS in Stage III CRC Patients	Resting CD4 regulatory T cell %CD4+ T cell || id:ebi-a-GCST90001482	Inverse variance weighted	4	-0.751424	0.489232	0.124557
ebi-a-GCST90001482	OS in Stage III CRC Patients	Resting CD4 regulatory T cell %CD4+ T cell || id:ebi-a-GCST90001482	MR Egger	4	-4.90057	3.46961	0.29334
ebi-a-GCST90001482	OS in Stage III CRC Patients	Resting CD4 regulatory T cell %CD4+ T cell || id:ebi-a-GCST90001482	Constrained maximum likelihood	4	-0.797933	0.493262	0.105735
ebi-a-GCST90001482	OS in Stage III CRC Patients	Resting CD4 regulatory T cell %CD4+ T cell || id:ebi-a-GCST90001482	Robust adjusted profile score (RAPS)	4	-0.757028	0.513752	0.140609
ebi-a-GCST90001482	OS in Stage III CRC Patients	Resting CD4 regulatory T cell %CD4+ T cell || id:ebi-a-GCST90001482	Bayesian Weighted Mendelian Randomization	4	-0.764131	0.500639	0.126932
ebi-a-GCST90001483	OS in Stage III CRC Patients	CD39+ resting CD4 regulatory T cell Absolute Count || id:ebi-a-GCST90001483	Inverse variance weighted	4	1.29785	0.80093	0.105139
ebi-a-GCST90001483	OS in Stage III CRC Patients	CD39+ resting CD4 regulatory T cell Absolute Count || id:ebi-a-GCST90001483	MR Egger	4	-5.38069	4.31944	0.339018
ebi-a-GCST90001483	OS in Stage III CRC Patients	CD39+ resting CD4 regulatory T cell Absolute Count || id:ebi-a-GCST90001483	Constrained maximum likelihood	4	1.23163	0.793061	0.120422
ebi-a-GCST90001483	OS in Stage III CRC Patients	CD39+ resting CD4 regulatory T cell Absolute Count || id:ebi-a-GCST90001483	Robust adjusted profile score (RAPS)	4	1.45706	0.758675	0.0547898
ebi-a-GCST90001483	OS in Stage III CRC Patients	CD39+ resting CD4 regulatory T cell Absolute Count || id:ebi-a-GCST90001483	Bayesian Weighted Mendelian Randomization	4	1.30341	0.872779	0.13533
ebi-a-GCST90001484	OS in Stage III CRC Patients	CD39+ resting CD4 regulatory T cell %resting CD4 regulatory T cell || id:ebi-a-GCST90001484	Inverse variance weighted	7	0.416953	0.180286	0.0207378
ebi-a-GCST90001484	OS in Stage III CRC Patients	CD39+ resting CD4 regulatory T cell %resting CD4 regulatory T cell || id:ebi-a-GCST90001484	MR Egger	7	0.326382	0.270466	0.281506
ebi-a-GCST90001484	OS in Stage III CRC Patients	CD39+ resting CD4 regulatory T cell %resting CD4 regulatory T cell || id:ebi-a-GCST90001484	Constrained maximum likelihood	7	0.427228	0.181477	0.018564
ebi-a-GCST90001484	OS in Stage III CRC Patients	CD39+ resting CD4 regulatory T cell %resting CD4 regulatory T cell || id:ebi-a-GCST90001484	Robust adjusted profile score (RAPS)	7	0.417194	0.186236	0.0250822
ebi-a-GCST90001484	OS in Stage III CRC Patients	CD39+ resting CD4 regulatory T cell %resting CD4 regulatory T cell || id:ebi-a-GCST90001484	Bayesian Weighted Mendelian Randomization	7	0.416936	0.181188	0.0213845
ebi-a-GCST90001485	OS in Stage III CRC Patients	CD39+ resting CD4 regulatory T cell %CD4 regulatory T cell || id:ebi-a-GCST90001485	Inverse variance weighted	7	0.143658	0.223929	0.521175
ebi-a-GCST90001485	OS in Stage III CRC Patients	CD39+ resting CD4 regulatory T cell %CD4 regulatory T cell || id:ebi-a-GCST90001485	MR Egger	7	-0.311683	0.288238	0.328918
ebi-a-GCST90001485	OS in Stage III CRC Patients	CD39+ resting CD4 regulatory T cell %CD4 regulatory T cell || id:ebi-a-GCST90001485	Constrained maximum likelihood	7	0.12742	0.187496	0.496765
ebi-a-GCST90001485	OS in Stage III CRC Patients	CD39+ resting CD4 regulatory T cell %CD4 regulatory T cell || id:ebi-a-GCST90001485	Robust adjusted profile score (RAPS)	7	0.148686	0.243097	0.540781
ebi-a-GCST90001485	OS in Stage III CRC Patients	CD39+ resting CD4 regulatory T cell %CD4 regulatory T cell || id:ebi-a-GCST90001485	Bayesian Weighted Mendelian Randomization	7	0.153266	0.230898	0.506829
ebi-a-GCST90001486	OS in Stage III CRC Patients	Activated CD4 regulatory T cell Absolute Count || id:ebi-a-GCST90001486	Constrained maximum likelihood	1	-3.93887	1.99598	0.0484502
ebi-a-GCST90001486	OS in Stage III CRC Patients	Activated CD4 regulatory T cell Absolute Count || id:ebi-a-GCST90001486	Robust adjusted profile score (RAPS)	1	-3.55586	1.8307	0.0520945
ebi-a-GCST90001487	OS in Stage III CRC Patients	Activated CD4 regulatory T cell %CD4 regulatory T cell || id:ebi-a-GCST90001487	Inverse variance weighted	7	0.529785	0.587852	0.36747
ebi-a-GCST90001487	OS in Stage III CRC Patients	Activated CD4 regulatory T cell %CD4 regulatory T cell || id:ebi-a-GCST90001487	MR Egger	7	3.97268	2.84453	0.221362
ebi-a-GCST90001487	OS in Stage III CRC Patients	Activated CD4 regulatory T cell %CD4 regulatory T cell || id:ebi-a-GCST90001487	Constrained maximum likelihood	7	0.466201	0.581908	0.423039
ebi-a-GCST90001487	OS in Stage III CRC Patients	Activated CD4 regulatory T cell %CD4 regulatory T cell || id:ebi-a-GCST90001487	Robust adjusted profile score (RAPS)	7	0.667431	0.610359	0.274172
ebi-a-GCST90001487	OS in Stage III CRC Patients	Activated CD4 regulatory T cell %CD4 regulatory T cell || id:ebi-a-GCST90001487	Bayesian Weighted Mendelian Randomization	7	0.58036	0.599639	0.33312
ebi-a-GCST90001488	OS in Stage III CRC Patients	Activated CD4 regulatory T cell %CD4+ T cell || id:ebi-a-GCST90001488	Inverse variance weighted	3	-0.477833	0.835026	0.567161
ebi-a-GCST90001488	OS in Stage III CRC Patients	Activated CD4 regulatory T cell %CD4+ T cell || id:ebi-a-GCST90001488	MR Egger	3	11.442	15.0782	0.586746
ebi-a-GCST90001488	OS in Stage III CRC Patients	Activated CD4 regulatory T cell %CD4+ T cell || id:ebi-a-GCST90001488	Constrained maximum likelihood	3	-0.614793	0.956983	0.520595
ebi-a-GCST90001488	OS in Stage III CRC Patients	Activated CD4 regulatory T cell %CD4+ T cell || id:ebi-a-GCST90001488	Robust adjusted profile score (RAPS)	3	-0.48362	0.908941	0.594678
ebi-a-GCST90001488	OS in Stage III CRC Patients	Activated CD4 regulatory T cell %CD4+ T cell || id:ebi-a-GCST90001488	Bayesian Weighted Mendelian Randomization	3	-0.494227	0.87365	0.571595
ebi-a-GCST90001489	OS in Stage III CRC Patients	CD39+ activated CD4 regulatory T cell Absolute Count || id:ebi-a-GCST90001489	Inverse variance weighted	8	0.26167	0.172078	0.128347
ebi-a-GCST90001489	OS in Stage III CRC Patients	CD39+ activated CD4 regulatory T cell Absolute Count || id:ebi-a-GCST90001489	MR Egger	8	0.512556	0.272094	0.10859
ebi-a-GCST90001489	OS in Stage III CRC Patients	CD39+ activated CD4 regulatory T cell Absolute Count || id:ebi-a-GCST90001489	Constrained maximum likelihood	8	0.240859	0.202571	0.234434
ebi-a-GCST90001489	OS in Stage III CRC Patients	CD39+ activated CD4 regulatory T cell Absolute Count || id:ebi-a-GCST90001489	Robust adjusted profile score (RAPS)	8	0.280727	0.177861	0.114484
ebi-a-GCST90001489	OS in Stage III CRC Patients	CD39+ activated CD4 regulatory T cell Absolute Count || id:ebi-a-GCST90001489	Bayesian Weighted Mendelian Randomization	8	0.264178	0.173505	0.12786
ebi-a-GCST90001490	OS in Stage III CRC Patients	CD39+ activated CD4 regulatory T cell %activated CD4 regulatory T cell || id:ebi-a-GCST90001490	Constrained maximum likelihood	1	-1.98315	1.11319	0.0748306
ebi-a-GCST90001490	OS in Stage III CRC Patients	CD39+ activated CD4 regulatory T cell %activated CD4 regulatory T cell || id:ebi-a-GCST90001490	Robust adjusted profile score (RAPS)	1	-1.9712	1.27495	0.122081
ebi-a-GCST90001491	OS in Stage III CRC Patients	CD39+ activated CD4 regulatory T cell %CD4 regulatory T cell || id:ebi-a-GCST90001491	Inverse variance weighted	6	0.129408	0.171677	0.450975
ebi-a-GCST90001491	OS in Stage III CRC Patients	CD39+ activated CD4 regulatory T cell %CD4 regulatory T cell || id:ebi-a-GCST90001491	MR Egger	6	-0.0607213	0.264944	0.829966
ebi-a-GCST90001491	OS in Stage III CRC Patients	CD39+ activated CD4 regulatory T cell %CD4 regulatory T cell || id:ebi-a-GCST90001491	Constrained maximum likelihood	6	0.1394	0.166394	0.402159
ebi-a-GCST90001491	OS in Stage III CRC Patients	CD39+ activated CD4 regulatory T cell %CD4 regulatory T cell || id:ebi-a-GCST90001491	Robust adjusted profile score (RAPS)	6	0.129565	0.177032	0.464246
ebi-a-GCST90001491	OS in Stage III CRC Patients	CD39+ activated CD4 regulatory T cell %CD4 regulatory T cell || id:ebi-a-GCST90001491	Bayesian Weighted Mendelian Randomization	6	0.12935	0.172373	0.453009
ebi-a-GCST90001492	OS in Stage III CRC Patients	Secreting CD4 regulatory T cell Absolute Count || id:ebi-a-GCST90001492	Inverse variance weighted	3	0.224536	0.647164	0.728625
ebi-a-GCST90001492	OS in Stage III CRC Patients	Secreting CD4 regulatory T cell Absolute Count || id:ebi-a-GCST90001492	MR Egger	3	-0.274772	1.57086	0.889759
ebi-a-GCST90001492	OS in Stage III CRC Patients	Secreting CD4 regulatory T cell Absolute Count || id:ebi-a-GCST90001492	Constrained maximum likelihood	3	0.123167	0.651234	0.849992
ebi-a-GCST90001492	OS in Stage III CRC Patients	Secreting CD4 regulatory T cell Absolute Count || id:ebi-a-GCST90001492	Robust adjusted profile score (RAPS)	3	0.2264	0.701828	0.747009
ebi-a-GCST90001492	OS in Stage III CRC Patients	Secreting CD4 regulatory T cell Absolute Count || id:ebi-a-GCST90001492	Bayesian Weighted Mendelian Randomization	3	0.236202	0.676457	0.726958
ebi-a-GCST90001493	OS in Stage III CRC Patients	Secreting CD4 regulatory T cell %CD4 regulatory T cell || id:ebi-a-GCST90001493	Inverse variance weighted	7	0.403325	0.367993	0.273074
ebi-a-GCST90001493	OS in Stage III CRC Patients	Secreting CD4 regulatory T cell %CD4 regulatory T cell || id:ebi-a-GCST90001493	MR Egger	7	1.0957	0.979398	0.314097
ebi-a-GCST90001493	OS in Stage III CRC Patients	Secreting CD4 regulatory T cell %CD4 regulatory T cell || id:ebi-a-GCST90001493	Constrained maximum likelihood	7	0.425776	0.387947	0.272418
ebi-a-GCST90001493	OS in Stage III CRC Patients	Secreting CD4 regulatory T cell %CD4 regulatory T cell || id:ebi-a-GCST90001493	Robust adjusted profile score (RAPS)	7	0.406952	0.393784	0.301399
ebi-a-GCST90001493	OS in Stage III CRC Patients	Secreting CD4 regulatory T cell %CD4 regulatory T cell || id:ebi-a-GCST90001493	Bayesian Weighted Mendelian Randomization	7	0.423233	0.384331	0.270801
ebi-a-GCST90001494	OS in Stage III CRC Patients	Secreting CD4 regulatory T cell %CD4+ T cell || id:ebi-a-GCST90001494	Inverse variance weighted	11	0.302005	0.383641	0.43116
ebi-a-GCST90001494	OS in Stage III CRC Patients	Secreting CD4 regulatory T cell %CD4+ T cell || id:ebi-a-GCST90001494	MR Egger	11	1.4777	1.39287	0.316372
ebi-a-GCST90001494	OS in Stage III CRC Patients	Secreting CD4 regulatory T cell %CD4+ T cell || id:ebi-a-GCST90001494	Constrained maximum likelihood	11	0.276345	0.418805	0.509355
ebi-a-GCST90001494	OS in Stage III CRC Patients	Secreting CD4 regulatory T cell %CD4+ T cell || id:ebi-a-GCST90001494	Robust adjusted profile score (RAPS)	11	0.318935	0.411819	0.438662
ebi-a-GCST90001494	OS in Stage III CRC Patients	Secreting CD4 regulatory T cell %CD4+ T cell || id:ebi-a-GCST90001494	Bayesian Weighted Mendelian Randomization	11	0.304405	0.396776	0.442965
ebi-a-GCST90001495	OS in Stage III CRC Patients	CD39+ secreting CD4 regulatory T cell Absolute Count || id:ebi-a-GCST90001495	Inverse variance weighted	6	0.0957382	0.161583	0.553515
ebi-a-GCST90001495	OS in Stage III CRC Patients	CD39+ secreting CD4 regulatory T cell Absolute Count || id:ebi-a-GCST90001495	MR Egger	6	0.0265846	0.2689	0.926002
ebi-a-GCST90001495	OS in Stage III CRC Patients	CD39+ secreting CD4 regulatory T cell Absolute Count || id:ebi-a-GCST90001495	Constrained maximum likelihood	6	0.106373	0.157487	0.499399
ebi-a-GCST90001495	OS in Stage III CRC Patients	CD39+ secreting CD4 regulatory T cell Absolute Count || id:ebi-a-GCST90001495	Robust adjusted profile score (RAPS)	6	0.0958325	0.16652	0.564952
ebi-a-GCST90001495	OS in Stage III CRC Patients	CD39+ secreting CD4 regulatory T cell Absolute Count || id:ebi-a-GCST90001495	Bayesian Weighted Mendelian Randomization	6	0.0957306	0.162186	0.555022
ebi-a-GCST90001496	OS in Stage III CRC Patients	CD39+ secreting CD4 regulatory T cell %secreting CD4 regulatory T cell || id:ebi-a-GCST90001496	Inverse variance weighted	5	-0.0501442	0.38693	0.896887
ebi-a-GCST90001496	OS in Stage III CRC Patients	CD39+ secreting CD4 regulatory T cell %secreting CD4 regulatory T cell || id:ebi-a-GCST90001496	MR Egger	5	0.718535	0.82361	0.447185
ebi-a-GCST90001496	OS in Stage III CRC Patients	CD39+ secreting CD4 regulatory T cell %secreting CD4 regulatory T cell || id:ebi-a-GCST90001496	Constrained maximum likelihood	5	-0.0575685	0.369484	0.876184
ebi-a-GCST90001496	OS in Stage III CRC Patients	CD39+ secreting CD4 regulatory T cell %secreting CD4 regulatory T cell || id:ebi-a-GCST90001496	Robust adjusted profile score (RAPS)	5	-0.0186637	0.385355	0.961372
ebi-a-GCST90001496	OS in Stage III CRC Patients	CD39+ secreting CD4 regulatory T cell %secreting CD4 regulatory T cell || id:ebi-a-GCST90001496	Bayesian Weighted Mendelian Randomization	5	-0.0476865	0.40047	0.905215
ebi-a-GCST90001497	OS in Stage III CRC Patients	CD39+ secreting CD4 regulatory T cell %CD4 regulatory T cell || id:ebi-a-GCST90001497	Inverse variance weighted	3	0.133102	0.402658	0.740978
ebi-a-GCST90001497	OS in Stage III CRC Patients	CD39+ secreting CD4 regulatory T cell %CD4 regulatory T cell || id:ebi-a-GCST90001497	MR Egger	3	0.41046	1.06717	0.766245
ebi-a-GCST90001497	OS in Stage III CRC Patients	CD39+ secreting CD4 regulatory T cell %CD4 regulatory T cell || id:ebi-a-GCST90001497	Constrained maximum likelihood	3	0.144185	0.38916	0.711007
ebi-a-GCST90001497	OS in Stage III CRC Patients	CD39+ secreting CD4 regulatory T cell %CD4 regulatory T cell || id:ebi-a-GCST90001497	Robust adjusted profile score (RAPS)	3	0.133562	0.419054	0.749936
ebi-a-GCST90001497	OS in Stage III CRC Patients	CD39+ secreting CD4 regulatory T cell %CD4 regulatory T cell || id:ebi-a-GCST90001497	Bayesian Weighted Mendelian Randomization	3	0.134818	0.407528	0.740781
ebi-a-GCST90001498	OS in Stage III CRC Patients	Activated & resting CD4 regulatory T cell Absolute Count || id:ebi-a-GCST90001498	Inverse variance weighted	7	0.207358	0.559232	0.710793
ebi-a-GCST90001498	OS in Stage III CRC Patients	Activated & resting CD4 regulatory T cell Absolute Count || id:ebi-a-GCST90001498	MR Egger	7	1.26815	2.60231	0.646646
ebi-a-GCST90001498	OS in Stage III CRC Patients	Activated & resting CD4 regulatory T cell Absolute Count || id:ebi-a-GCST90001498	Constrained maximum likelihood	7	0.225562	0.604438	0.709017
ebi-a-GCST90001498	OS in Stage III CRC Patients	Activated & resting CD4 regulatory T cell Absolute Count || id:ebi-a-GCST90001498	Robust adjusted profile score (RAPS)	7	0.326429	0.537324	0.543514
ebi-a-GCST90001498	OS in Stage III CRC Patients	Activated & resting CD4 regulatory T cell Absolute Count || id:ebi-a-GCST90001498	Bayesian Weighted Mendelian Randomization	7	0.25054	0.594972	0.673685
ebi-a-GCST90001499	OS in Stage III CRC Patients	Activated & resting CD4 regulatory T cell %CD4 regulatory T cell || id:ebi-a-GCST90001499	Inverse variance weighted	6	-0.515634	0.432376	0.233041
ebi-a-GCST90001499	OS in Stage III CRC Patients	Activated & resting CD4 regulatory T cell %CD4 regulatory T cell || id:ebi-a-GCST90001499	MR Egger	6	-1.87343	1.24821	0.207782
ebi-a-GCST90001499	OS in Stage III CRC Patients	Activated & resting CD4 regulatory T cell %CD4 regulatory T cell || id:ebi-a-GCST90001499	Constrained maximum likelihood	6	-0.50322	0.43218	0.244272
ebi-a-GCST90001499	OS in Stage III CRC Patients	Activated & resting CD4 regulatory T cell %CD4 regulatory T cell || id:ebi-a-GCST90001499	Robust adjusted profile score (RAPS)	6	-0.518483	0.455649	0.255162
ebi-a-GCST90001499	OS in Stage III CRC Patients	Activated & resting CD4 regulatory T cell %CD4 regulatory T cell || id:ebi-a-GCST90001499	Bayesian Weighted Mendelian Randomization	6	-0.52088	0.440443	0.236956
ebi-a-GCST90001500	OS in Stage III CRC Patients	Activated & resting CD4 regulatory T cell %CD4+ T cell || id:ebi-a-GCST90001500	Inverse variance weighted	4	-0.484009	0.771084	0.530201
ebi-a-GCST90001500	OS in Stage III CRC Patients	Activated & resting CD4 regulatory T cell %CD4+ T cell || id:ebi-a-GCST90001500	MR Egger	4	-5.56885	2.25163	0.131897
ebi-a-GCST90001500	OS in Stage III CRC Patients	Activated & resting CD4 regulatory T cell %CD4+ T cell || id:ebi-a-GCST90001500	Constrained maximum likelihood	4	-0.558639	0.60784	0.358066
ebi-a-GCST90001500	OS in Stage III CRC Patients	Activated & resting CD4 regulatory T cell %CD4+ T cell || id:ebi-a-GCST90001500	Robust adjusted profile score (RAPS)	4	-0.574175	0.742609	0.439413
ebi-a-GCST90001500	OS in Stage III CRC Patients	Activated & resting CD4 regulatory T cell %CD4+ T cell || id:ebi-a-GCST90001500	Bayesian Weighted Mendelian Randomization	4	-0.565746	0.807809	0.483711
ebi-a-GCST90001501	OS in Stage III CRC Patients	Activated & secreting CD4 regulatory T cell Absolute Count || id:ebi-a-GCST90001501	Inverse variance weighted	2	0.0466885	0.750768	0.950413
ebi-a-GCST90001501	OS in Stage III CRC Patients	Activated & secreting CD4 regulatory T cell Absolute Count || id:ebi-a-GCST90001501	Constrained maximum likelihood	2	-0.0715029	0.805174	0.929237
ebi-a-GCST90001501	OS in Stage III CRC Patients	Activated & secreting CD4 regulatory T cell Absolute Count || id:ebi-a-GCST90001501	Robust adjusted profile score (RAPS)	2	0.0470453	0.811864	0.953791
ebi-a-GCST90001501	OS in Stage III CRC Patients	Activated & secreting CD4 regulatory T cell Absolute Count || id:ebi-a-GCST90001501	Bayesian Weighted Mendelian Randomization	2	0.0476822	0.786524	0.951659
ebi-a-GCST90001502	OS in Stage III CRC Patients	Activated & secreting CD4 regulatory T cell %CD4 regulatory T cell || id:ebi-a-GCST90001502	Inverse variance weighted	4	0.72108	0.482497	0.135052
ebi-a-GCST90001502	OS in Stage III CRC Patients	Activated & secreting CD4 regulatory T cell %CD4 regulatory T cell || id:ebi-a-GCST90001502	MR Egger	4	1.24507	1.41281	0.471129
ebi-a-GCST90001502	OS in Stage III CRC Patients	Activated & secreting CD4 regulatory T cell %CD4 regulatory T cell || id:ebi-a-GCST90001502	Constrained maximum likelihood	4	0.690305	0.482716	0.152704
ebi-a-GCST90001502	OS in Stage III CRC Patients	Activated & secreting CD4 regulatory T cell %CD4 regulatory T cell || id:ebi-a-GCST90001502	Robust adjusted profile score (RAPS)	4	0.721587	0.505531	0.153469
ebi-a-GCST90001502	OS in Stage III CRC Patients	Activated & secreting CD4 regulatory T cell %CD4 regulatory T cell || id:ebi-a-GCST90001502	Bayesian Weighted Mendelian Randomization	4	0.725034	0.489784	0.13879
ebi-a-GCST90001503	OS in Stage III CRC Patients	Activated & secreting CD4 regulatory T cell %CD4+ T cell || id:ebi-a-GCST90001503	Inverse variance weighted	10	0.323187	0.404456	0.424252
ebi-a-GCST90001503	OS in Stage III CRC Patients	Activated & secreting CD4 regulatory T cell %CD4+ T cell || id:ebi-a-GCST90001503	MR Egger	10	0.508278	1.15584	0.671758
ebi-a-GCST90001503	OS in Stage III CRC Patients	Activated & secreting CD4 regulatory T cell %CD4+ T cell || id:ebi-a-GCST90001503	Constrained maximum likelihood	10	0.328126	0.457014	0.472771
ebi-a-GCST90001503	OS in Stage III CRC Patients	Activated & secreting CD4 regulatory T cell %CD4+ T cell || id:ebi-a-GCST90001503	Robust adjusted profile score (RAPS)	10	0.346309	0.433631	0.424508
ebi-a-GCST90001503	OS in Stage III CRC Patients	Activated & secreting CD4 regulatory T cell %CD4+ T cell || id:ebi-a-GCST90001503	Bayesian Weighted Mendelian Randomization	10	0.335352	0.422882	0.427768
ebi-a-GCST90001504	OS in Stage III CRC Patients	CD25++ CD4+ T cell Absolute Count || id:ebi-a-GCST90001504	Constrained maximum likelihood	1	0.291234	0.675564	0.666397
ebi-a-GCST90001504	OS in Stage III CRC Patients	CD25++ CD4+ T cell Absolute Count || id:ebi-a-GCST90001504	Robust adjusted profile score (RAPS)	1	0.301622	0.712319	0.671977
ebi-a-GCST90001505	OS in Stage III CRC Patients	CD25++ CD4+ T cell %CD4+ T cell || id:ebi-a-GCST90001505	Inverse variance weighted	4	-0.0204481	0.419318	0.961106
ebi-a-GCST90001505	OS in Stage III CRC Patients	CD25++ CD4+ T cell %CD4+ T cell || id:ebi-a-GCST90001505	MR Egger	4	-0.0433531	0.753655	0.959358
ebi-a-GCST90001505	OS in Stage III CRC Patients	CD25++ CD4+ T cell %CD4+ T cell || id:ebi-a-GCST90001505	Constrained maximum likelihood	4	-0.0135167	0.428444	0.974832
ebi-a-GCST90001505	OS in Stage III CRC Patients	CD25++ CD4+ T cell %CD4+ T cell || id:ebi-a-GCST90001505	Robust adjusted profile score (RAPS)	4	-0.0206283	0.442327	0.962803
ebi-a-GCST90001505	OS in Stage III CRC Patients	CD25++ CD4+ T cell %CD4+ T cell || id:ebi-a-GCST90001505	Bayesian Weighted Mendelian Randomization	4	-0.0129211	0.432181	0.976149
ebi-a-GCST90001506	OS in Stage III CRC Patients	CD25++ CD4+ T cell %T cell || id:ebi-a-GCST90001506	Inverse variance weighted	8	-0.349923	0.376188	0.352277
ebi-a-GCST90001506	OS in Stage III CRC Patients	CD25++ CD4+ T cell %T cell || id:ebi-a-GCST90001506	MR Egger	8	0.725446	0.751866	0.371877
ebi-a-GCST90001506	OS in Stage III CRC Patients	CD25++ CD4+ T cell %T cell || id:ebi-a-GCST90001506	Constrained maximum likelihood	8	-0.334881	0.404426	0.407648
ebi-a-GCST90001506	OS in Stage III CRC Patients	CD25++ CD4+ T cell %T cell || id:ebi-a-GCST90001506	Robust adjusted profile score (RAPS)	8	-0.355286	0.404386	0.379628
ebi-a-GCST90001506	OS in Stage III CRC Patients	CD25++ CD4+ T cell %T cell || id:ebi-a-GCST90001506	Bayesian Weighted Mendelian Randomization	8	-0.376482	0.394637	0.340086
ebi-a-GCST90001507	OS in Stage III CRC Patients	CD25++ CD45RA+ CD4 not regulatory T cell Absolute Count || id:ebi-a-GCST90001507	Inverse variance weighted	6	0.333961	0.458888	0.466759
ebi-a-GCST90001507	OS in Stage III CRC Patients	CD25++ CD45RA+ CD4 not regulatory T cell Absolute Count || id:ebi-a-GCST90001507	MR Egger	6	0.114573	2.34161	0.963321
ebi-a-GCST90001507	OS in Stage III CRC Patients	CD25++ CD45RA+ CD4 not regulatory T cell Absolute Count || id:ebi-a-GCST90001507	Constrained maximum likelihood	6	0.357763	0.498876	0.47329
ebi-a-GCST90001507	OS in Stage III CRC Patients	CD25++ CD45RA+ CD4 not regulatory T cell Absolute Count || id:ebi-a-GCST90001507	Robust adjusted profile score (RAPS)	6	0.336713	0.491415	0.493224
ebi-a-GCST90001507	OS in Stage III CRC Patients	CD25++ CD45RA+ CD4 not regulatory T cell Absolute Count || id:ebi-a-GCST90001507	Bayesian Weighted Mendelian Randomization	6	0.329163	0.472505	0.486032
ebi-a-GCST90001508	OS in Stage III CRC Patients	CD25++ CD45RA+ CD4 not regulatory T cell %CD4+ T cell || id:ebi-a-GCST90001508	Inverse variance weighted	3	0.232214	0.528241	0.660228
ebi-a-GCST90001508	OS in Stage III CRC Patients	CD25++ CD45RA+ CD4 not regulatory T cell %CD4+ T cell || id:ebi-a-GCST90001508	MR Egger	3	-2.73868	5.92329	0.724291
ebi-a-GCST90001508	OS in Stage III CRC Patients	CD25++ CD45RA+ CD4 not regulatory T cell %CD4+ T cell || id:ebi-a-GCST90001508	Constrained maximum likelihood	3	0.29025	0.514749	0.572845
ebi-a-GCST90001508	OS in Stage III CRC Patients	CD25++ CD45RA+ CD4 not regulatory T cell %CD4+ T cell || id:ebi-a-GCST90001508	Robust adjusted profile score (RAPS)	3	0.233063	0.561749	0.678224
ebi-a-GCST90001508	OS in Stage III CRC Patients	CD25++ CD45RA+ CD4 not regulatory T cell %CD4+ T cell || id:ebi-a-GCST90001508	Bayesian Weighted Mendelian Randomization	3	0.233268	0.541343	0.666537
ebi-a-GCST90001509	OS in Stage III CRC Patients	CD25++ CD45RA+ CD4 not regulatory T cell %T cell || id:ebi-a-GCST90001509	Inverse variance weighted	4	0.448542	0.56566	0.427805
ebi-a-GCST90001509	OS in Stage III CRC Patients	CD25++ CD45RA+ CD4 not regulatory T cell %T cell || id:ebi-a-GCST90001509	MR Egger	4	-5.00106	10.3173	0.675766
ebi-a-GCST90001509	OS in Stage III CRC Patients	CD25++ CD45RA+ CD4 not regulatory T cell %T cell || id:ebi-a-GCST90001509	Constrained maximum likelihood	4	0.417414	0.543367	0.44237
ebi-a-GCST90001509	OS in Stage III CRC Patients	CD25++ CD45RA+ CD4 not regulatory T cell %T cell || id:ebi-a-GCST90001509	Robust adjusted profile score (RAPS)	4	0.452001	0.605907	0.455672
ebi-a-GCST90001509	OS in Stage III CRC Patients	CD25++ CD45RA+ CD4 not regulatory T cell %T cell || id:ebi-a-GCST90001509	Bayesian Weighted Mendelian Randomization	4	0.450763	0.58351	0.439817
ebi-a-GCST90001510	OS in Stage III CRC Patients	CD25++ CD45RA- CD4 not regulatory T cell Absolute Count || id:ebi-a-GCST90001510	Inverse variance weighted	2	0.634074	1.07794	0.55638
ebi-a-GCST90001510	OS in Stage III CRC Patients	CD25++ CD45RA- CD4 not regulatory T cell Absolute Count || id:ebi-a-GCST90001510	Constrained maximum likelihood	2	0.590021	0.585337	0.313453
ebi-a-GCST90001510	OS in Stage III CRC Patients	CD25++ CD45RA- CD4 not regulatory T cell Absolute Count || id:ebi-a-GCST90001510	Robust adjusted profile score (RAPS)	2	0.542755	0.639532	0.396062
ebi-a-GCST90001510	OS in Stage III CRC Patients	CD25++ CD45RA- CD4 not regulatory T cell Absolute Count || id:ebi-a-GCST90001510	Bayesian Weighted Mendelian Randomization	2	0.530606	0.950742	0.576778
ebi-a-GCST90001511	OS in Stage III CRC Patients	CD25++ CD45RA- CD4 not regulatory T cell %CD4+ T cell || id:ebi-a-GCST90001511	Inverse variance weighted	4	0.0383615	0.393586	0.922356
ebi-a-GCST90001511	OS in Stage III CRC Patients	CD25++ CD45RA- CD4 not regulatory T cell %CD4+ T cell || id:ebi-a-GCST90001511	MR Egger	4	-0.293566	0.712341	0.720228
ebi-a-GCST90001511	OS in Stage III CRC Patients	CD25++ CD45RA- CD4 not regulatory T cell %CD4+ T cell || id:ebi-a-GCST90001511	Constrained maximum likelihood	4	-0.000899837	0.402375	0.998216
ebi-a-GCST90001511	OS in Stage III CRC Patients	CD25++ CD45RA- CD4 not regulatory T cell %CD4+ T cell || id:ebi-a-GCST90001511	Robust adjusted profile score (RAPS)	4	0.0387273	0.414986	0.925648
ebi-a-GCST90001511	OS in Stage III CRC Patients	CD25++ CD45RA- CD4 not regulatory T cell %CD4+ T cell || id:ebi-a-GCST90001511	Bayesian Weighted Mendelian Randomization	4	0.0474294	0.404963	0.906765
ebi-a-GCST90001512	OS in Stage III CRC Patients	CD25++ CD45RA- CD4 not regulatory T cell %T cell || id:ebi-a-GCST90001512	Inverse variance weighted	7	-0.0485182	0.399026	0.903223
ebi-a-GCST90001512	OS in Stage III CRC Patients	CD25++ CD45RA- CD4 not regulatory T cell %T cell || id:ebi-a-GCST90001512	MR Egger	7	0.224399	0.839533	0.799921
ebi-a-GCST90001512	OS in Stage III CRC Patients	CD25++ CD45RA- CD4 not regulatory T cell %T cell || id:ebi-a-GCST90001512	Constrained maximum likelihood	7	-0.104751	0.388746	0.787577
ebi-a-GCST90001512	OS in Stage III CRC Patients	CD25++ CD45RA- CD4 not regulatory T cell %T cell || id:ebi-a-GCST90001512	Robust adjusted profile score (RAPS)	7	-0.109287	0.384848	0.776431
ebi-a-GCST90001512	OS in Stage III CRC Patients	CD25++ CD45RA- CD4 not regulatory T cell %T cell || id:ebi-a-GCST90001512	Bayesian Weighted Mendelian Randomization	7	-0.0436454	0.407653	0.914737
ebi-a-GCST90001513	OS in Stage III CRC Patients	CD4 regulatory T cell Absolute Count || id:ebi-a-GCST90001513	Inverse variance weighted	4	0.592226	0.617979	0.337898
ebi-a-GCST90001513	OS in Stage III CRC Patients	CD4 regulatory T cell Absolute Count || id:ebi-a-GCST90001513	MR Egger	4	0.995579	2.66447	0.744555
ebi-a-GCST90001513	OS in Stage III CRC Patients	CD4 regulatory T cell Absolute Count || id:ebi-a-GCST90001513	Constrained maximum likelihood	4	0.553459	0.686819	0.420341
ebi-a-GCST90001513	OS in Stage III CRC Patients	CD4 regulatory T cell Absolute Count || id:ebi-a-GCST90001513	Robust adjusted profile score (RAPS)	4	0.603598	0.676695	0.372404
ebi-a-GCST90001513	OS in Stage III CRC Patients	CD4 regulatory T cell Absolute Count || id:ebi-a-GCST90001513	Bayesian Weighted Mendelian Randomization	4	0.612146	0.653679	0.349035
ebi-a-GCST90001514	OS in Stage III CRC Patients	Hematopoietic Stem Cell Absolute Count || id:ebi-a-GCST90001514	Inverse variance weighted	4	-0.0516344	0.36646	0.887949
ebi-a-GCST90001514	OS in Stage III CRC Patients	Hematopoietic Stem Cell Absolute Count || id:ebi-a-GCST90001514	MR Egger	4	-0.0746849	0.753365	0.930072
ebi-a-GCST90001514	OS in Stage III CRC Patients	Hematopoietic Stem Cell Absolute Count || id:ebi-a-GCST90001514	Constrained maximum likelihood	4	-0.00331172	0.378185	0.993013
ebi-a-GCST90001514	OS in Stage III CRC Patients	Hematopoietic Stem Cell Absolute Count || id:ebi-a-GCST90001514	Robust adjusted profile score (RAPS)	4	-0.0519794	0.400334	0.896693
ebi-a-GCST90001514	OS in Stage III CRC Patients	Hematopoietic Stem Cell Absolute Count || id:ebi-a-GCST90001514	Bayesian Weighted Mendelian Randomization	4	-0.0491586	0.4035	0.903033
ebi-a-GCST90001515	OS in Stage III CRC Patients	Immature Myeloid-Derived Suppressor Cells Absolute Count || id:ebi-a-GCST90001515	Inverse variance weighted	5	-0.238413	0.322794	0.460154
ebi-a-GCST90001515	OS in Stage III CRC Patients	Immature Myeloid-Derived Suppressor Cells Absolute Count || id:ebi-a-GCST90001515	MR Egger	5	-1.19134	1.12099	0.365855
ebi-a-GCST90001515	OS in Stage III CRC Patients	Immature Myeloid-Derived Suppressor Cells Absolute Count || id:ebi-a-GCST90001515	Constrained maximum likelihood	5	-0.229021	0.338385	0.498528
ebi-a-GCST90001515	OS in Stage III CRC Patients	Immature Myeloid-Derived Suppressor Cells Absolute Count || id:ebi-a-GCST90001515	Robust adjusted profile score (RAPS)	5	-0.24196	0.341448	0.478555
ebi-a-GCST90001515	OS in Stage III CRC Patients	Immature Myeloid-Derived Suppressor Cells Absolute Count || id:ebi-a-GCST90001515	Bayesian Weighted Mendelian Randomization	5	-0.244044	0.331669	0.461849
ebi-a-GCST90001516	OS in Stage III CRC Patients	Immature Myeloid-Derived Suppressor Cells %CD33dim HLA DR- CD66b- || id:ebi-a-GCST90001516	Inverse variance weighted	5	-0.43864	0.59347	0.45984
ebi-a-GCST90001516	OS in Stage III CRC Patients	Immature Myeloid-Derived Suppressor Cells %CD33dim HLA DR- CD66b- || id:ebi-a-GCST90001516	MR Egger	5	2.20271	0.966563	0.107042
ebi-a-GCST90001516	OS in Stage III CRC Patients	Immature Myeloid-Derived Suppressor Cells %CD33dim HLA DR- CD66b- || id:ebi-a-GCST90001516	Constrained maximum likelihood	5	-0.415165	0.521843	0.42628
ebi-a-GCST90001516	OS in Stage III CRC Patients	Immature Myeloid-Derived Suppressor Cells %CD33dim HLA DR- CD66b- || id:ebi-a-GCST90001516	Robust adjusted profile score (RAPS)	5	0.000756176	0.722793	0.999165
ebi-a-GCST90001516	OS in Stage III CRC Patients	Immature Myeloid-Derived Suppressor Cells %CD33dim HLA DR- CD66b- || id:ebi-a-GCST90001516	Bayesian Weighted Mendelian Randomization	5	-0.210298	0.602434	0.727028
ebi-a-GCST90001517	OS in Stage III CRC Patients	CD33+ HLA DR+ Absolute Count || id:ebi-a-GCST90001517	Inverse variance weighted	12	0.21627	0.284161	0.446609
ebi-a-GCST90001517	OS in Stage III CRC Patients	CD33+ HLA DR+ Absolute Count || id:ebi-a-GCST90001517	MR Egger	12	0.661163	1.01536	0.529623
ebi-a-GCST90001517	OS in Stage III CRC Patients	CD33+ HLA DR+ Absolute Count || id:ebi-a-GCST90001517	Constrained maximum likelihood	12	0.163845	0.33608	0.625891
ebi-a-GCST90001517	OS in Stage III CRC Patients	CD33+ HLA DR+ Absolute Count || id:ebi-a-GCST90001517	Robust adjusted profile score (RAPS)	12	0.160971	0.30311	0.595373
ebi-a-GCST90001517	OS in Stage III CRC Patients	CD33+ HLA DR+ Absolute Count || id:ebi-a-GCST90001517	Bayesian Weighted Mendelian Randomization	12	0.213856	0.296925	0.471379
ebi-a-GCST90001518	OS in Stage III CRC Patients	CD33+ HLA DR+ CD14- Absolute Count || id:ebi-a-GCST90001518	Inverse variance weighted	9	0.0577369	0.352404	0.869859
ebi-a-GCST90001518	OS in Stage III CRC Patients	CD33+ HLA DR+ CD14- Absolute Count || id:ebi-a-GCST90001518	MR Egger	9	0.767968	1.15984	0.529074
ebi-a-GCST90001518	OS in Stage III CRC Patients	CD33+ HLA DR+ CD14- Absolute Count || id:ebi-a-GCST90001518	Constrained maximum likelihood	9	-0.0459129	0.369371	0.901078
ebi-a-GCST90001518	OS in Stage III CRC Patients	CD33+ HLA DR+ CD14- Absolute Count || id:ebi-a-GCST90001518	Robust adjusted profile score (RAPS)	9	-0.0327727	0.345335	0.924393
ebi-a-GCST90001518	OS in Stage III CRC Patients	CD33+ HLA DR+ CD14- Absolute Count || id:ebi-a-GCST90001518	Bayesian Weighted Mendelian Randomization	9	0.0448843	0.343742	0.896111
ebi-a-GCST90001519	OS in Stage III CRC Patients	CD33+ HLA DR+ CD14- %CD33+ HLA DR+ || id:ebi-a-GCST90001519	Inverse variance weighted	5	0.0397021	0.375519	0.9158
ebi-a-GCST90001519	OS in Stage III CRC Patients	CD33+ HLA DR+ CD14- %CD33+ HLA DR+ || id:ebi-a-GCST90001519	MR Egger	5	-0.142616	1.61281	0.935109
ebi-a-GCST90001519	OS in Stage III CRC Patients	CD33+ HLA DR+ CD14- %CD33+ HLA DR+ || id:ebi-a-GCST90001519	Constrained maximum likelihood	5	0.0459183	0.362708	0.899258
ebi-a-GCST90001519	OS in Stage III CRC Patients	CD33+ HLA DR+ CD14- %CD33+ HLA DR+ || id:ebi-a-GCST90001519	Robust adjusted profile score (RAPS)	5	0.0401598	0.402496	0.920521
ebi-a-GCST90001519	OS in Stage III CRC Patients	CD33+ HLA DR+ CD14- %CD33+ HLA DR+ || id:ebi-a-GCST90001519	Bayesian Weighted Mendelian Randomization	5	0.0447787	0.38846	0.908229
ebi-a-GCST90001520	OS in Stage III CRC Patients	CD33+ HLA DR+ CD14dim Absolute Count || id:ebi-a-GCST90001520	Inverse variance weighted	5	0.0394821	0.413648	0.923959
ebi-a-GCST90001520	OS in Stage III CRC Patients	CD33+ HLA DR+ CD14dim Absolute Count || id:ebi-a-GCST90001520	MR Egger	5	0.900496	1.54829	0.60165
ebi-a-GCST90001520	OS in Stage III CRC Patients	CD33+ HLA DR+ CD14dim Absolute Count || id:ebi-a-GCST90001520	Constrained maximum likelihood	5	0.051365	0.420261	0.902723
ebi-a-GCST90001520	OS in Stage III CRC Patients	CD33+ HLA DR+ CD14dim Absolute Count || id:ebi-a-GCST90001520	Robust adjusted profile score (RAPS)	5	0.10886	0.428601	0.799504
ebi-a-GCST90001520	OS in Stage III CRC Patients	CD33+ HLA DR+ CD14dim Absolute Count || id:ebi-a-GCST90001520	Bayesian Weighted Mendelian Randomization	5	0.0519316	0.448821	0.907885
ebi-a-GCST90001521	OS in Stage III CRC Patients	CD33+ HLA DR+ CD14dim %CD33+ HLA DR+ || id:ebi-a-GCST90001521	Inverse variance weighted	7	0.428218	0.54795	0.434514
ebi-a-GCST90001521	OS in Stage III CRC Patients	CD33+ HLA DR+ CD14dim %CD33+ HLA DR+ || id:ebi-a-GCST90001521	MR Egger	7	2.40122	2.40474	0.36386
ebi-a-GCST90001521	OS in Stage III CRC Patients	CD33+ HLA DR+ CD14dim %CD33+ HLA DR+ || id:ebi-a-GCST90001521	Constrained maximum likelihood	7	0.154493	0.49353	0.754252
ebi-a-GCST90001521	OS in Stage III CRC Patients	CD33+ HLA DR+ CD14dim %CD33+ HLA DR+ || id:ebi-a-GCST90001521	Robust adjusted profile score (RAPS)	7	0.565061	0.650654	0.385148
ebi-a-GCST90001521	OS in Stage III CRC Patients	CD33+ HLA DR+ CD14dim %CD33+ HLA DR+ || id:ebi-a-GCST90001521	Bayesian Weighted Mendelian Randomization	7	0.521851	0.570252	0.360127
ebi-a-GCST90001522	OS in Stage III CRC Patients	CD33- HLA DR- Absolute Count || id:ebi-a-GCST90001522	Inverse variance weighted	4	0.27155	0.401874	0.499225
ebi-a-GCST90001522	OS in Stage III CRC Patients	CD33- HLA DR- Absolute Count || id:ebi-a-GCST90001522	MR Egger	4	0.3905	1.05041	0.745764
ebi-a-GCST90001522	OS in Stage III CRC Patients	CD33- HLA DR- Absolute Count || id:ebi-a-GCST90001522	Constrained maximum likelihood	4	0.325614	0.399462	0.414997
ebi-a-GCST90001522	OS in Stage III CRC Patients	CD33- HLA DR- Absolute Count || id:ebi-a-GCST90001522	Robust adjusted profile score (RAPS)	4	0.271795	0.439737	0.536519
ebi-a-GCST90001522	OS in Stage III CRC Patients	CD33- HLA DR- Absolute Count || id:ebi-a-GCST90001522	Bayesian Weighted Mendelian Randomization	4	0.279997	0.42724	0.512235
ebi-a-GCST90001523	OS in Stage III CRC Patients	CD33- HLA DR+ Absolute Count || id:ebi-a-GCST90001523	Inverse variance weighted	6	0.396042	0.4482	0.376897
ebi-a-GCST90001523	OS in Stage III CRC Patients	CD33- HLA DR+ Absolute Count || id:ebi-a-GCST90001523	MR Egger	6	-0.715846	2.67042	0.801905
ebi-a-GCST90001523	OS in Stage III CRC Patients	CD33- HLA DR+ Absolute Count || id:ebi-a-GCST90001523	Constrained maximum likelihood	6	0.307708	0.501135	0.539201
ebi-a-GCST90001523	OS in Stage III CRC Patients	CD33- HLA DR+ Absolute Count || id:ebi-a-GCST90001523	Robust adjusted profile score (RAPS)	6	0.322261	0.461509	0.485004
ebi-a-GCST90001523	OS in Stage III CRC Patients	CD33- HLA DR+ Absolute Count || id:ebi-a-GCST90001523	Bayesian Weighted Mendelian Randomization	6	0.35071	0.499822	0.482884
ebi-a-GCST90001524	OS in Stage III CRC Patients	Granulocytic Myeloid-Derived Suppressor Cells Absolute Count || id:ebi-a-GCST90001524	Inverse variance weighted	5	-0.0297513	0.442752	0.946425
ebi-a-GCST90001524	OS in Stage III CRC Patients	Granulocytic Myeloid-Derived Suppressor Cells Absolute Count || id:ebi-a-GCST90001524	MR Egger	5	2.05223	1.76382	0.328751
ebi-a-GCST90001524	OS in Stage III CRC Patients	Granulocytic Myeloid-Derived Suppressor Cells Absolute Count || id:ebi-a-GCST90001524	Constrained maximum likelihood	5	-0.0112452	0.495905	0.981909
ebi-a-GCST90001524	OS in Stage III CRC Patients	Granulocytic Myeloid-Derived Suppressor Cells Absolute Count || id:ebi-a-GCST90001524	Robust adjusted profile score (RAPS)	5	-0.00201494	0.47336	0.996604
ebi-a-GCST90001524	OS in Stage III CRC Patients	Granulocytic Myeloid-Derived Suppressor Cells Absolute Count || id:ebi-a-GCST90001524	Bayesian Weighted Mendelian Randomization	5	-0.0422405	0.464862	0.927599
ebi-a-GCST90001525	OS in Stage III CRC Patients	CD33dim HLA DR+ CD11b+ Absolute Count || id:ebi-a-GCST90001525	Inverse variance weighted	8	0.351666	0.342612	0.304691
ebi-a-GCST90001525	OS in Stage III CRC Patients	CD33dim HLA DR+ CD11b+ Absolute Count || id:ebi-a-GCST90001525	MR Egger	8	-1.59488	1.61229	0.360761
ebi-a-GCST90001525	OS in Stage III CRC Patients	CD33dim HLA DR+ CD11b+ Absolute Count || id:ebi-a-GCST90001525	Constrained maximum likelihood	8	0.340139	0.345464	0.324827
ebi-a-GCST90001525	OS in Stage III CRC Patients	CD33dim HLA DR+ CD11b+ Absolute Count || id:ebi-a-GCST90001525	Robust adjusted profile score (RAPS)	8	0.359693	0.368296	0.328747
ebi-a-GCST90001525	OS in Stage III CRC Patients	CD33dim HLA DR+ CD11b+ Absolute Count || id:ebi-a-GCST90001525	Bayesian Weighted Mendelian Randomization	8	0.366562	0.357243	0.304851
ebi-a-GCST90001526	OS in Stage III CRC Patients	CD33dim HLA DR+ CD11b+ %CD33dim HLA DR+ || id:ebi-a-GCST90001526	Inverse variance weighted	7	0.0192731	0.25771	0.940385
ebi-a-GCST90001526	OS in Stage III CRC Patients	CD33dim HLA DR+ CD11b+ %CD33dim HLA DR+ || id:ebi-a-GCST90001526	MR Egger	7	-0.410623	0.570279	0.503744
ebi-a-GCST90001526	OS in Stage III CRC Patients	CD33dim HLA DR+ CD11b+ %CD33dim HLA DR+ || id:ebi-a-GCST90001526	Constrained maximum likelihood	7	-0.0220897	0.234293	0.924885
ebi-a-GCST90001526	OS in Stage III CRC Patients	CD33dim HLA DR+ CD11b+ %CD33dim HLA DR+ || id:ebi-a-GCST90001526	Robust adjusted profile score (RAPS)	7	-0.00793196	0.252822	0.974972
ebi-a-GCST90001526	OS in Stage III CRC Patients	CD33dim HLA DR+ CD11b+ %CD33dim HLA DR+ || id:ebi-a-GCST90001526	Bayesian Weighted Mendelian Randomization	7	0.014446	0.272787	0.957766
ebi-a-GCST90001527	OS in Stage III CRC Patients	CD33dim HLA DR+ CD11b- Absolute Count || id:ebi-a-GCST90001527	Inverse variance weighted	6	-0.131515	0.360883	0.71554
ebi-a-GCST90001527	OS in Stage III CRC Patients	CD33dim HLA DR+ CD11b- Absolute Count || id:ebi-a-GCST90001527	MR Egger	6	-0.602997	1.0381	0.592487
ebi-a-GCST90001527	OS in Stage III CRC Patients	CD33dim HLA DR+ CD11b- Absolute Count || id:ebi-a-GCST90001527	Constrained maximum likelihood	6	-0.124664	0.364409	0.732276
ebi-a-GCST90001527	OS in Stage III CRC Patients	CD33dim HLA DR+ CD11b- Absolute Count || id:ebi-a-GCST90001527	Robust adjusted profile score (RAPS)	6	-0.132374	0.388283	0.733163
ebi-a-GCST90001527	OS in Stage III CRC Patients	CD33dim HLA DR+ CD11b- Absolute Count || id:ebi-a-GCST90001527	Bayesian Weighted Mendelian Randomization	6	-0.137284	0.373225	0.712998
ebi-a-GCST90001528	OS in Stage III CRC Patients	CD33dim HLA DR+ CD11b- %CD33dim HLA DR+ || id:ebi-a-GCST90001528	Inverse variance weighted	5	0.131217	0.241333	0.586634
ebi-a-GCST90001528	OS in Stage III CRC Patients	CD33dim HLA DR+ CD11b- %CD33dim HLA DR+ || id:ebi-a-GCST90001528	MR Egger	5	-0.211004	0.595668	0.746601
ebi-a-GCST90001528	OS in Stage III CRC Patients	CD33dim HLA DR+ CD11b- %CD33dim HLA DR+ || id:ebi-a-GCST90001528	Constrained maximum likelihood	5	0.120497	0.238018	0.612681
ebi-a-GCST90001528	OS in Stage III CRC Patients	CD33dim HLA DR+ CD11b- %CD33dim HLA DR+ || id:ebi-a-GCST90001528	Robust adjusted profile score (RAPS)	5	0.132096	0.251732	0.599759
ebi-a-GCST90001528	OS in Stage III CRC Patients	CD33dim HLA DR+ CD11b- %CD33dim HLA DR+ || id:ebi-a-GCST90001528	Bayesian Weighted Mendelian Randomization	5	0.130616	0.245159	0.594185
ebi-a-GCST90001529	OS in Stage III CRC Patients	CD66b++ myeloid cell Absolute Count || id:ebi-a-GCST90001529	Inverse variance weighted	5	-0.338709	0.447269	0.44888
ebi-a-GCST90001529	OS in Stage III CRC Patients	CD66b++ myeloid cell Absolute Count || id:ebi-a-GCST90001529	MR Egger	5	2.33982	2.44661	0.409446
ebi-a-GCST90001529	OS in Stage III CRC Patients	CD66b++ myeloid cell Absolute Count || id:ebi-a-GCST90001529	Constrained maximum likelihood	5	-0.333078	0.479003	0.486833
ebi-a-GCST90001529	OS in Stage III CRC Patients	CD66b++ myeloid cell Absolute Count || id:ebi-a-GCST90001529	Robust adjusted profile score (RAPS)	5	-0.347855	0.485252	0.473463
ebi-a-GCST90001529	OS in Stage III CRC Patients	CD66b++ myeloid cell Absolute Count || id:ebi-a-GCST90001529	Bayesian Weighted Mendelian Randomization	5	-0.364629	0.471545	0.439365
ebi-a-GCST90001530	OS in Stage III CRC Patients	Monocytic Myeloid-Derived Suppressor Cells Absolute Count || id:ebi-a-GCST90001530	Inverse variance weighted	5	-0.219301	0.32591	0.501019
ebi-a-GCST90001530	OS in Stage III CRC Patients	Monocytic Myeloid-Derived Suppressor Cells Absolute Count || id:ebi-a-GCST90001530	MR Egger	5	0.756635	0.809873	0.419087
ebi-a-GCST90001530	OS in Stage III CRC Patients	Monocytic Myeloid-Derived Suppressor Cells Absolute Count || id:ebi-a-GCST90001530	Constrained maximum likelihood	5	-0.200999	0.315304	0.523814
ebi-a-GCST90001530	OS in Stage III CRC Patients	Monocytic Myeloid-Derived Suppressor Cells Absolute Count || id:ebi-a-GCST90001530	Robust adjusted profile score (RAPS)	5	-0.222479	0.342842	0.516385
ebi-a-GCST90001530	OS in Stage III CRC Patients	Monocytic Myeloid-Derived Suppressor Cells Absolute Count || id:ebi-a-GCST90001530	Bayesian Weighted Mendelian Randomization	5	-0.224429	0.335225	0.503184
ebi-a-GCST90001531	OS in Stage III CRC Patients	CD33dim HLA DR- Absolute Count || id:ebi-a-GCST90001531	Inverse variance weighted	6	-0.0688586	0.321105	0.830202
ebi-a-GCST90001531	OS in Stage III CRC Patients	CD33dim HLA DR- Absolute Count || id:ebi-a-GCST90001531	MR Egger	6	0.470417	0.714006	0.545992
ebi-a-GCST90001531	OS in Stage III CRC Patients	CD33dim HLA DR- Absolute Count || id:ebi-a-GCST90001531	Constrained maximum likelihood	6	-0.0684403	0.323259	0.832325
ebi-a-GCST90001531	OS in Stage III CRC Patients	CD33dim HLA DR- Absolute Count || id:ebi-a-GCST90001531	Robust adjusted profile score (RAPS)	6	-0.064361	0.339152	0.849489
ebi-a-GCST90001531	OS in Stage III CRC Patients	CD33dim HLA DR- Absolute Count || id:ebi-a-GCST90001531	Bayesian Weighted Mendelian Randomization	6	-0.0703024	0.328688	0.830635
ebi-a-GCST90001532	OS in Stage III CRC Patients	Basophil Absolute Count || id:ebi-a-GCST90001532	Inverse variance weighted	6	-0.253514	0.31514	0.421138
ebi-a-GCST90001532	OS in Stage III CRC Patients	Basophil Absolute Count || id:ebi-a-GCST90001532	MR Egger	6	0.469345	0.676688	0.52611
ebi-a-GCST90001532	OS in Stage III CRC Patients	Basophil Absolute Count || id:ebi-a-GCST90001532	Constrained maximum likelihood	6	-0.222396	0.316499	0.482258
ebi-a-GCST90001532	OS in Stage III CRC Patients	Basophil Absolute Count || id:ebi-a-GCST90001532	Robust adjusted profile score (RAPS)	6	-0.256249	0.332543	0.44096
ebi-a-GCST90001532	OS in Stage III CRC Patients	Basophil Absolute Count || id:ebi-a-GCST90001532	Bayesian Weighted Mendelian Randomization	6	-0.258153	0.323122	0.424329
ebi-a-GCST90001533	OS in Stage III CRC Patients	Basophil %CD33dim HLA DR- CD66b- || id:ebi-a-GCST90001533	Inverse variance weighted	7	0.205811	0.28902	0.476404
ebi-a-GCST90001533	OS in Stage III CRC Patients	Basophil %CD33dim HLA DR- CD66b- || id:ebi-a-GCST90001533	MR Egger	7	-0.145207	0.630911	0.827091
ebi-a-GCST90001533	OS in Stage III CRC Patients	Basophil %CD33dim HLA DR- CD66b- || id:ebi-a-GCST90001533	Constrained maximum likelihood	7	0.159283	0.305506	0.602108
ebi-a-GCST90001533	OS in Stage III CRC Patients	Basophil %CD33dim HLA DR- CD66b- || id:ebi-a-GCST90001533	Robust adjusted profile score (RAPS)	7	0.207088	0.303706	0.495321
ebi-a-GCST90001533	OS in Stage III CRC Patients	Basophil %CD33dim HLA DR- CD66b- || id:ebi-a-GCST90001533	Bayesian Weighted Mendelian Randomization	7	0.208185	0.302811	0.491762
ebi-a-GCST90001534	OS in Stage III CRC Patients	CD45RA- CD4+ T cell Absolute Count || id:ebi-a-GCST90001534	Inverse variance weighted	5	0.664499	0.523337	0.204179
ebi-a-GCST90001534	OS in Stage III CRC Patients	CD45RA- CD4+ T cell Absolute Count || id:ebi-a-GCST90001534	MR Egger	5	2.12427	1.76123	0.314212
ebi-a-GCST90001534	OS in Stage III CRC Patients	CD45RA- CD4+ T cell Absolute Count || id:ebi-a-GCST90001534	Constrained maximum likelihood	5	0.643736	0.517236	0.21329
ebi-a-GCST90001534	OS in Stage III CRC Patients	CD45RA- CD4+ T cell Absolute Count || id:ebi-a-GCST90001534	Robust adjusted profile score (RAPS)	5	0.667737	0.57035	0.2417
ebi-a-GCST90001534	OS in Stage III CRC Patients	CD45RA- CD4+ T cell Absolute Count || id:ebi-a-GCST90001534	Bayesian Weighted Mendelian Randomization	5	0.665921	0.548256	0.224512
ebi-a-GCST90001535	OS in Stage III CRC Patients	CD45RA- CD4+ T cell %CD4+ T cell || id:ebi-a-GCST90001535	Inverse variance weighted	3	0.0134267	0.736132	0.985448
ebi-a-GCST90001535	OS in Stage III CRC Patients	CD45RA- CD4+ T cell %CD4+ T cell || id:ebi-a-GCST90001535	MR Egger	3	2.43963	3.68374	0.627608
ebi-a-GCST90001535	OS in Stage III CRC Patients	CD45RA- CD4+ T cell %CD4+ T cell || id:ebi-a-GCST90001535	Constrained maximum likelihood	3	0.0962279	0.725803	0.894525
ebi-a-GCST90001535	OS in Stage III CRC Patients	CD45RA- CD4+ T cell %CD4+ T cell || id:ebi-a-GCST90001535	Robust adjusted profile score (RAPS)	3	0.0135083	0.788569	0.986333
ebi-a-GCST90001535	OS in Stage III CRC Patients	CD45RA- CD4+ T cell %CD4+ T cell || id:ebi-a-GCST90001535	Bayesian Weighted Mendelian Randomization	3	0.0132336	0.757321	0.986058
ebi-a-GCST90001536	OS in Stage III CRC Patients	CD45RA- CD4+ T cell %T cell || id:ebi-a-GCST90001536	Inverse variance weighted	5	-0.848172	0.872576	0.331034
ebi-a-GCST90001536	OS in Stage III CRC Patients	CD45RA- CD4+ T cell %T cell || id:ebi-a-GCST90001536	MR Egger	5	5.1129	6.37615	0.481261
ebi-a-GCST90001536	OS in Stage III CRC Patients	CD45RA- CD4+ T cell %T cell || id:ebi-a-GCST90001536	Constrained maximum likelihood	5	-0.717657	0.757113	0.343187
ebi-a-GCST90001536	OS in Stage III CRC Patients	CD45RA- CD4+ T cell %T cell || id:ebi-a-GCST90001536	Robust adjusted profile score (RAPS)	5	-0.770297	0.809287	0.341187
ebi-a-GCST90001536	OS in Stage III CRC Patients	CD45RA- CD4+ T cell %T cell || id:ebi-a-GCST90001536	Bayesian Weighted Mendelian Randomization	5	-0.813221	0.921393	0.377452
ebi-a-GCST90001537	OS in Stage III CRC Patients	Central Memory CD4+ T cell Absolute Count || id:ebi-a-GCST90001537	Inverse variance weighted	3	0.113478	0.725051	0.875631
ebi-a-GCST90001537	OS in Stage III CRC Patients	Central Memory CD4+ T cell Absolute Count || id:ebi-a-GCST90001537	MR Egger	3	2.34948	2.83225	0.559142
ebi-a-GCST90001537	OS in Stage III CRC Patients	Central Memory CD4+ T cell Absolute Count || id:ebi-a-GCST90001537	Constrained maximum likelihood	3	0.140978	0.727168	0.846275
ebi-a-GCST90001537	OS in Stage III CRC Patients	Central Memory CD4+ T cell Absolute Count || id:ebi-a-GCST90001537	Robust adjusted profile score (RAPS)	3	0.115056	0.782131	0.883048
ebi-a-GCST90001537	OS in Stage III CRC Patients	Central Memory CD4+ T cell Absolute Count || id:ebi-a-GCST90001537	Bayesian Weighted Mendelian Randomization	3	0.108198	0.758789	0.886611
ebi-a-GCST90001538	OS in Stage III CRC Patients	Central Memory CD4+ T cell %CD4+ T cell || id:ebi-a-GCST90001538	Inverse variance weighted	10	0.0861374	0.459847	0.851412
ebi-a-GCST90001538	OS in Stage III CRC Patients	Central Memory CD4+ T cell %CD4+ T cell || id:ebi-a-GCST90001538	MR Egger	10	-0.554415	1.48774	0.719083
ebi-a-GCST90001538	OS in Stage III CRC Patients	Central Memory CD4+ T cell %CD4+ T cell || id:ebi-a-GCST90001538	Constrained maximum likelihood	10	0.121321	0.435035	0.78034
ebi-a-GCST90001538	OS in Stage III CRC Patients	Central Memory CD4+ T cell %CD4+ T cell || id:ebi-a-GCST90001538	Robust adjusted profile score (RAPS)	10	0.0861357	0.45653	0.850348
ebi-a-GCST90001538	OS in Stage III CRC Patients	Central Memory CD4+ T cell %CD4+ T cell || id:ebi-a-GCST90001538	Bayesian Weighted Mendelian Randomization	10	-0.0142183	0.490078	0.976855
ebi-a-GCST90001539	OS in Stage III CRC Patients	Central Memory CD4+ T cell %T cell || id:ebi-a-GCST90001539	Inverse variance weighted	4	0.161259	0.717095	0.822074
ebi-a-GCST90001539	OS in Stage III CRC Patients	Central Memory CD4+ T cell %T cell || id:ebi-a-GCST90001539	MR Egger	4	-0.246542	6.60506	0.973616
ebi-a-GCST90001539	OS in Stage III CRC Patients	Central Memory CD4+ T cell %T cell || id:ebi-a-GCST90001539	Constrained maximum likelihood	4	0.0933729	0.760574	0.902292
ebi-a-GCST90001539	OS in Stage III CRC Patients	Central Memory CD4+ T cell %T cell || id:ebi-a-GCST90001539	Robust adjusted profile score (RAPS)	4	0.166112	0.77216	0.829669
ebi-a-GCST90001539	OS in Stage III CRC Patients	Central Memory CD4+ T cell %T cell || id:ebi-a-GCST90001539	Bayesian Weighted Mendelian Randomization	4	0.157229	0.782231	0.840698
ebi-a-GCST90001540	OS in Stage III CRC Patients	Naive CD4+ T cell Absolute Count || id:ebi-a-GCST90001540	Inverse variance weighted	6	0.142151	0.526359	0.787111
ebi-a-GCST90001540	OS in Stage III CRC Patients	Naive CD4+ T cell Absolute Count || id:ebi-a-GCST90001540	MR Egger	6	-0.17287	2.53988	0.949003
ebi-a-GCST90001540	OS in Stage III CRC Patients	Naive CD4+ T cell Absolute Count || id:ebi-a-GCST90001540	Constrained maximum likelihood	6	0.154746	0.571441	0.786546
ebi-a-GCST90001540	OS in Stage III CRC Patients	Naive CD4+ T cell Absolute Count || id:ebi-a-GCST90001540	Robust adjusted profile score (RAPS)	6	0.128782	0.626614	0.837166
ebi-a-GCST90001540	OS in Stage III CRC Patients	Naive CD4+ T cell Absolute Count || id:ebi-a-GCST90001540	Bayesian Weighted Mendelian Randomization	6	0.155193	0.54332	0.775156
ebi-a-GCST90001541	OS in Stage III CRC Patients	Naive CD4+ T cell %CD4+ T cell || id:ebi-a-GCST90001541	Inverse variance weighted	8	-0.475828	0.482272	0.32382
ebi-a-GCST90001541	OS in Stage III CRC Patients	Naive CD4+ T cell %CD4+ T cell || id:ebi-a-GCST90001541	MR Egger	8	-2.61615	1.87094	0.211522
ebi-a-GCST90001541	OS in Stage III CRC Patients	Naive CD4+ T cell %CD4+ T cell || id:ebi-a-GCST90001541	Constrained maximum likelihood	8	-0.485943	0.538267	0.366637
ebi-a-GCST90001541	OS in Stage III CRC Patients	Naive CD4+ T cell %CD4+ T cell || id:ebi-a-GCST90001541	Robust adjusted profile score (RAPS)	8	-0.495777	0.525073	0.345064
ebi-a-GCST90001541	OS in Stage III CRC Patients	Naive CD4+ T cell %CD4+ T cell || id:ebi-a-GCST90001541	Bayesian Weighted Mendelian Randomization	8	-0.47217	0.506163	0.350901
ebi-a-GCST90001542	OS in Stage III CRC Patients	Effector Memory CD4+ T cell Absolute Count || id:ebi-a-GCST90001542	Inverse variance weighted	3	0.987661	0.625484	0.114328
ebi-a-GCST90001542	OS in Stage III CRC Patients	Effector Memory CD4+ T cell Absolute Count || id:ebi-a-GCST90001542	MR Egger	3	1.74024	3.6581	0.717317
ebi-a-GCST90001542	OS in Stage III CRC Patients	Effector Memory CD4+ T cell Absolute Count || id:ebi-a-GCST90001542	Constrained maximum likelihood	3	0.966542	0.61021	0.113205
ebi-a-GCST90001542	OS in Stage III CRC Patients	Effector Memory CD4+ T cell Absolute Count || id:ebi-a-GCST90001542	Robust adjusted profile score (RAPS)	3	0.986909	0.69758	0.157139
ebi-a-GCST90001542	OS in Stage III CRC Patients	Effector Memory CD4+ T cell Absolute Count || id:ebi-a-GCST90001542	Bayesian Weighted Mendelian Randomization	3	1.00739	0.665944	0.130349
ebi-a-GCST90001543	OS in Stage III CRC Patients	Effector Memory CD4+ T cell %CD4+ T cell || id:ebi-a-GCST90001543	Inverse variance weighted	5	0.097215	0.944678	0.918036
ebi-a-GCST90001543	OS in Stage III CRC Patients	Effector Memory CD4+ T cell %CD4+ T cell || id:ebi-a-GCST90001543	MR Egger	5	1.89863	4.70893	0.713818
ebi-a-GCST90001543	OS in Stage III CRC Patients	Effector Memory CD4+ T cell %CD4+ T cell || id:ebi-a-GCST90001543	Constrained maximum likelihood	5	0.217553	0.918754	0.812819
ebi-a-GCST90001543	OS in Stage III CRC Patients	Effector Memory CD4+ T cell %CD4+ T cell || id:ebi-a-GCST90001543	Robust adjusted profile score (RAPS)	5	0.503413	1.03454	0.626538
ebi-a-GCST90001543	OS in Stage III CRC Patients	Effector Memory CD4+ T cell %CD4+ T cell || id:ebi-a-GCST90001543	Bayesian Weighted Mendelian Randomization	5	0.316737	0.990785	0.749209
ebi-a-GCST90001544	OS in Stage III CRC Patients	Effector Memory CD4+ T cell %T cell || id:ebi-a-GCST90001544	Inverse variance weighted	7	0.175283	0.556754	0.75289
ebi-a-GCST90001544	OS in Stage III CRC Patients	Effector Memory CD4+ T cell %T cell || id:ebi-a-GCST90001544	MR Egger	7	2.19697	1.39132	0.175156
ebi-a-GCST90001544	OS in Stage III CRC Patients	Effector Memory CD4+ T cell %T cell || id:ebi-a-GCST90001544	Constrained maximum likelihood	7	0.210915	0.562258	0.70757
ebi-a-GCST90001544	OS in Stage III CRC Patients	Effector Memory CD4+ T cell %T cell || id:ebi-a-GCST90001544	Robust adjusted profile score (RAPS)	7	0.394799	0.554121	0.476169
ebi-a-GCST90001544	OS in Stage III CRC Patients	Effector Memory CD4+ T cell %T cell || id:ebi-a-GCST90001544	Bayesian Weighted Mendelian Randomization	7	0.210971	0.590195	0.720748
ebi-a-GCST90001545	OS in Stage III CRC Patients	Terminally Differentiated CD4+ T cell Absolute Count || id:ebi-a-GCST90001545	Inverse variance weighted	3	-0.851665	0.702785	0.225572
ebi-a-GCST90001545	OS in Stage III CRC Patients	Terminally Differentiated CD4+ T cell Absolute Count || id:ebi-a-GCST90001545	MR Egger	3	-1.168	2.1721	0.685909
ebi-a-GCST90001545	OS in Stage III CRC Patients	Terminally Differentiated CD4+ T cell Absolute Count || id:ebi-a-GCST90001545	Constrained maximum likelihood	3	-0.775168	0.694452	0.264324
ebi-a-GCST90001545	OS in Stage III CRC Patients	Terminally Differentiated CD4+ T cell Absolute Count || id:ebi-a-GCST90001545	Robust adjusted profile score (RAPS)	3	-0.851925	0.766052	0.266096
ebi-a-GCST90001545	OS in Stage III CRC Patients	Terminally Differentiated CD4+ T cell Absolute Count || id:ebi-a-GCST90001545	Bayesian Weighted Mendelian Randomization	3	-0.858773	0.733442	0.241646
ebi-a-GCST90001546	OS in Stage III CRC Patients	Terminally Differentiated CD4+ T cell %CD4+ T cell || id:ebi-a-GCST90001546	Inverse variance weighted	6	-0.102807	0.589796	0.861623
ebi-a-GCST90001546	OS in Stage III CRC Patients	Terminally Differentiated CD4+ T cell %CD4+ T cell || id:ebi-a-GCST90001546	MR Egger	6	-1.65689	2.11611	0.477396
ebi-a-GCST90001546	OS in Stage III CRC Patients	Terminally Differentiated CD4+ T cell %CD4+ T cell || id:ebi-a-GCST90001546	Constrained maximum likelihood	6	-0.120525	0.641672	0.85101
ebi-a-GCST90001546	OS in Stage III CRC Patients	Terminally Differentiated CD4+ T cell %CD4+ T cell || id:ebi-a-GCST90001546	Robust adjusted profile score (RAPS)	6	-0.218735	0.617617	0.723219
ebi-a-GCST90001546	OS in Stage III CRC Patients	Terminally Differentiated CD4+ T cell %CD4+ T cell || id:ebi-a-GCST90001546	Bayesian Weighted Mendelian Randomization	6	-0.0944196	0.613751	0.877736
ebi-a-GCST90001547	OS in Stage III CRC Patients	Terminally Differentiated CD4+ T cell %T cell || id:ebi-a-GCST90001547	Inverse variance weighted	4	-0.541233	0.682642	0.427865
ebi-a-GCST90001547	OS in Stage III CRC Patients	Terminally Differentiated CD4+ T cell %T cell || id:ebi-a-GCST90001547	MR Egger	4	-2.66976	2.099	0.331288
ebi-a-GCST90001547	OS in Stage III CRC Patients	Terminally Differentiated CD4+ T cell %T cell || id:ebi-a-GCST90001547	Constrained maximum likelihood	4	-0.485372	0.691983	0.48304
ebi-a-GCST90001547	OS in Stage III CRC Patients	Terminally Differentiated CD4+ T cell %T cell || id:ebi-a-GCST90001547	Robust adjusted profile score (RAPS)	4	-0.548766	0.74036	0.458562
ebi-a-GCST90001547	OS in Stage III CRC Patients	Terminally Differentiated CD4+ T cell %T cell || id:ebi-a-GCST90001547	Bayesian Weighted Mendelian Randomization	4	-0.541561	0.71935	0.451542
ebi-a-GCST90001548	OS in Stage III CRC Patients	Central Memory CD8+ T cell Absolute Count || id:ebi-a-GCST90001548	Inverse variance weighted	3	0.191815	0.87691	0.826853
ebi-a-GCST90001548	OS in Stage III CRC Patients	Central Memory CD8+ T cell Absolute Count || id:ebi-a-GCST90001548	MR Egger	3	0.803933	2.41654	0.795542
ebi-a-GCST90001548	OS in Stage III CRC Patients	Central Memory CD8+ T cell Absolute Count || id:ebi-a-GCST90001548	Constrained maximum likelihood	3	0.138898	0.806712	0.863298
ebi-a-GCST90001548	OS in Stage III CRC Patients	Central Memory CD8+ T cell Absolute Count || id:ebi-a-GCST90001548	Robust adjusted profile score (RAPS)	3	0.192225	0.962051	0.841631
ebi-a-GCST90001548	OS in Stage III CRC Patients	Central Memory CD8+ T cell Absolute Count || id:ebi-a-GCST90001548	Bayesian Weighted Mendelian Randomization	3	0.191965	0.918632	0.834473
ebi-a-GCST90001549	OS in Stage III CRC Patients	Central Memory CD8+ T cell %CD8+ T cell || id:ebi-a-GCST90001549	Inverse variance weighted	7	0.61247	0.545835	0.261829
ebi-a-GCST90001549	OS in Stage III CRC Patients	Central Memory CD8+ T cell %CD8+ T cell || id:ebi-a-GCST90001549	MR Egger	7	5.20298	3.40346	0.186874
ebi-a-GCST90001549	OS in Stage III CRC Patients	Central Memory CD8+ T cell %CD8+ T cell || id:ebi-a-GCST90001549	Constrained maximum likelihood	7	0.631661	0.590352	0.284632
ebi-a-GCST90001549	OS in Stage III CRC Patients	Central Memory CD8+ T cell %CD8+ T cell || id:ebi-a-GCST90001549	Robust adjusted profile score (RAPS)	7	0.589369	0.596292	0.322961
ebi-a-GCST90001549	OS in Stage III CRC Patients	Central Memory CD8+ T cell %CD8+ T cell || id:ebi-a-GCST90001549	Bayesian Weighted Mendelian Randomization	7	0.613786	0.572896	0.284001
ebi-a-GCST90001550	OS in Stage III CRC Patients	Central Memory CD8+ T cell %T cell || id:ebi-a-GCST90001550	Inverse variance weighted	6	0.440566	0.654681	0.500981
ebi-a-GCST90001550	OS in Stage III CRC Patients	Central Memory CD8+ T cell %T cell || id:ebi-a-GCST90001550	MR Egger	6	1.24859	2.12335	0.588109
ebi-a-GCST90001550	OS in Stage III CRC Patients	Central Memory CD8+ T cell %T cell || id:ebi-a-GCST90001550	Constrained maximum likelihood	6	0.451094	0.667559	0.499208
ebi-a-GCST90001550	OS in Stage III CRC Patients	Central Memory CD8+ T cell %T cell || id:ebi-a-GCST90001550	Robust adjusted profile score (RAPS)	6	0.446057	0.716743	0.533719
ebi-a-GCST90001550	OS in Stage III CRC Patients	Central Memory CD8+ T cell %T cell || id:ebi-a-GCST90001550	Bayesian Weighted Mendelian Randomization	6	0.446563	0.687128	0.515758
ebi-a-GCST90001551	OS in Stage III CRC Patients	Naive CD8+ T cell Absolute Count || id:ebi-a-GCST90001551	Inverse variance weighted	8	0.474699	0.657096	0.470037
ebi-a-GCST90001551	OS in Stage III CRC Patients	Naive CD8+ T cell Absolute Count || id:ebi-a-GCST90001551	MR Egger	8	-0.925981	3.60144	0.805681
ebi-a-GCST90001551	OS in Stage III CRC Patients	Naive CD8+ T cell Absolute Count || id:ebi-a-GCST90001551	Constrained maximum likelihood	8	0.567635	0.69069	0.411169
ebi-a-GCST90001551	OS in Stage III CRC Patients	Naive CD8+ T cell Absolute Count || id:ebi-a-GCST90001551	Robust adjusted profile score (RAPS)	8	0.569738	0.712636	0.424012
ebi-a-GCST90001551	OS in Stage III CRC Patients	Naive CD8+ T cell Absolute Count || id:ebi-a-GCST90001551	Bayesian Weighted Mendelian Randomization	8	0.499869	0.690137	0.468879
ebi-a-GCST90001552	OS in Stage III CRC Patients	Naive CD8+ T cell %CD8+ T cell || id:ebi-a-GCST90001552	Inverse variance weighted	9	-0.358721	0.481611	0.456371
ebi-a-GCST90001552	OS in Stage III CRC Patients	Naive CD8+ T cell %CD8+ T cell || id:ebi-a-GCST90001552	MR Egger	9	-2.02202	0.85926	0.050847
ebi-a-GCST90001552	OS in Stage III CRC Patients	Naive CD8+ T cell %CD8+ T cell || id:ebi-a-GCST90001552	Constrained maximum likelihood	9	-0.155878	0.695249	0.822598
ebi-a-GCST90001552	OS in Stage III CRC Patients	Naive CD8+ T cell %CD8+ T cell || id:ebi-a-GCST90001552	Robust adjusted profile score (RAPS)	9	-0.571437	0.597012	0.338486
ebi-a-GCST90001552	OS in Stage III CRC Patients	Naive CD8+ T cell %CD8+ T cell || id:ebi-a-GCST90001552	Bayesian Weighted Mendelian Randomization	9	-0.198209	0.586629	0.735456
ebi-a-GCST90001553	OS in Stage III CRC Patients	Naive CD8+ T cell %T cell || id:ebi-a-GCST90001553	Inverse variance weighted	11	0.251671	0.683983	0.712911
ebi-a-GCST90001553	OS in Stage III CRC Patients	Naive CD8+ T cell %T cell || id:ebi-a-GCST90001553	MR Egger	11	2.35501	4.18192	0.587092
ebi-a-GCST90001553	OS in Stage III CRC Patients	Naive CD8+ T cell %T cell || id:ebi-a-GCST90001553	Constrained maximum likelihood	11	0.142369	0.78515	0.856111
ebi-a-GCST90001553	OS in Stage III CRC Patients	Naive CD8+ T cell %T cell || id:ebi-a-GCST90001553	Robust adjusted profile score (RAPS)	11	0.18481	0.680544	0.785959
ebi-a-GCST90001553	OS in Stage III CRC Patients	Naive CD8+ T cell %T cell || id:ebi-a-GCST90001553	Bayesian Weighted Mendelian Randomization	11	0.252188	0.735741	0.731773
ebi-a-GCST90001554	OS in Stage III CRC Patients	Effector Memory CD8+ T cell Absolute Count || id:ebi-a-GCST90001554	Inverse variance weighted	9	0.662253	0.331517	0.0457556
ebi-a-GCST90001554	OS in Stage III CRC Patients	Effector Memory CD8+ T cell Absolute Count || id:ebi-a-GCST90001554	MR Egger	9	1.22605	0.601887	0.0810692
ebi-a-GCST90001554	OS in Stage III CRC Patients	Effector Memory CD8+ T cell Absolute Count || id:ebi-a-GCST90001554	Constrained maximum likelihood	9	0.617188	0.374218	0.0990914
ebi-a-GCST90001554	OS in Stage III CRC Patients	Effector Memory CD8+ T cell Absolute Count || id:ebi-a-GCST90001554	Robust adjusted profile score (RAPS)	9	0.665073	0.359028	0.0639649
ebi-a-GCST90001554	OS in Stage III CRC Patients	Effector Memory CD8+ T cell Absolute Count || id:ebi-a-GCST90001554	Bayesian Weighted Mendelian Randomization	9	0.670812	0.370014	0.0698411
ebi-a-GCST90001555	OS in Stage III CRC Patients	Effector Memory CD8+ T cell %CD8+ T cell || id:ebi-a-GCST90001555	Inverse variance weighted	5	-0.497284	0.71685	0.487866
ebi-a-GCST90001555	OS in Stage III CRC Patients	Effector Memory CD8+ T cell %CD8+ T cell || id:ebi-a-GCST90001555	MR Egger	5	3.63539	1.84326	0.143132
ebi-a-GCST90001555	OS in Stage III CRC Patients	Effector Memory CD8+ T cell %CD8+ T cell || id:ebi-a-GCST90001555	Constrained maximum likelihood	5	-0.494978	0.641889	0.440631
ebi-a-GCST90001555	OS in Stage III CRC Patients	Effector Memory CD8+ T cell %CD8+ T cell || id:ebi-a-GCST90001555	Robust adjusted profile score (RAPS)	5	-0.433504	0.722271	0.548376
ebi-a-GCST90001555	OS in Stage III CRC Patients	Effector Memory CD8+ T cell %CD8+ T cell || id:ebi-a-GCST90001555	Bayesian Weighted Mendelian Randomization	5	-0.422589	0.729387	0.562335
ebi-a-GCST90001556	OS in Stage III CRC Patients	Effector Memory CD8+ T cell %T cell || id:ebi-a-GCST90001556	Inverse variance weighted	5	0.441549	0.490107	0.367628
ebi-a-GCST90001556	OS in Stage III CRC Patients	Effector Memory CD8+ T cell %T cell || id:ebi-a-GCST90001556	MR Egger	5	1.49731	0.707418	0.124586
ebi-a-GCST90001556	OS in Stage III CRC Patients	Effector Memory CD8+ T cell %T cell || id:ebi-a-GCST90001556	Constrained maximum likelihood	5	0.304222	0.561701	0.588088
ebi-a-GCST90001556	OS in Stage III CRC Patients	Effector Memory CD8+ T cell %T cell || id:ebi-a-GCST90001556	Robust adjusted profile score (RAPS)	5	0.553056	0.52634	0.29337
ebi-a-GCST90001556	OS in Stage III CRC Patients	Effector Memory CD8+ T cell %T cell || id:ebi-a-GCST90001556	Bayesian Weighted Mendelian Randomization	5	0.488923	0.496556	0.324807
ebi-a-GCST90001557	OS in Stage III CRC Patients	Terminally Differentiated CD8+ T cell Absolute Count || id:ebi-a-GCST90001557	Inverse variance weighted	4	-0.117782	0.64127	0.854272
ebi-a-GCST90001557	OS in Stage III CRC Patients	Terminally Differentiated CD8+ T cell Absolute Count || id:ebi-a-GCST90001557	MR Egger	4	2.38012	6.55878	0.75145
ebi-a-GCST90001557	OS in Stage III CRC Patients	Terminally Differentiated CD8+ T cell Absolute Count || id:ebi-a-GCST90001557	Constrained maximum likelihood	4	-0.156336	0.685329	0.819555
ebi-a-GCST90001557	OS in Stage III CRC Patients	Terminally Differentiated CD8+ T cell Absolute Count || id:ebi-a-GCST90001557	Robust adjusted profile score (RAPS)	4	-0.119028	0.695258	0.864067
ebi-a-GCST90001557	OS in Stage III CRC Patients	Terminally Differentiated CD8+ T cell Absolute Count || id:ebi-a-GCST90001557	Bayesian Weighted Mendelian Randomization	4	-0.12251	0.666954	0.85426
ebi-a-GCST90001558	OS in Stage III CRC Patients	Terminally Differentiated CD8+ T cell %CD8+ T cell || id:ebi-a-GCST90001558	Inverse variance weighted	3	0.576984	0.637206	0.365206
[truncated: 2,688 more rows]

## Sheet: Supplement Table3
Supplement Table 3 MR analysis results of 731 Plasma Immune Cells with PFS in Stage III CRC Patients
[truncated: 3,488 more rows]

## Sheet: Supplement Table4
Supplement Table 4 Sensitivity analysis (Cochran’s Q test) results of 731 Plasma Immune Cells with OS in Stage III CRC Patients
[truncated: 1,341 more rows]

[truncated: 9 more sheets: Supplement Table5, Supplement Table6, Supplement Table7, Supplement Table8, Supplement Table9, Supplement Table10, Supplement Table11, Supplement Table12, Supplement Table13]
